# Supplementary material
Source: publisher figshare collection journal article supplement (https://gsapubs.figshare.com/ndownloader/files/34070900)
Supplement: Supplementary file 1 [file 34070900]

## Sheet: Pluton area calculation
Area of CC is given to the model							Thickness	L:W		Average length			Pluton Length	Pluton Width	Average of L and W	Pluton Volume		Top pluton	Center of pluton	Base of pluton	Rand. Line	Random line dist from centter of pluton	Is random line shallower than top of pluton?	Pluton sampled?		Cross sectional "average" length	Cross Sectional Width	Cross sectional Length	Cross Sectional area	Cross sectional area		Core complex L:W	Core complex W	Core complex L	Core complex Area	% area of pluton	% area of pluton	% volume of crust	Est. Volume of magmatic complexes
			Half Thickness	km		A	3.5	1.5		divide by	exponent	Avg length						15			12											1.5	35
Half Thickness	km		LS	3.5		B	6.3	3.5										22			28											7	50
LS	3.5		HS	6.3		a	2.71429	2.5										2.71429			7.4											2.89091	3.13333
HS	6.3		ML	4.7		b	3.28571	5										3.28571			4											6.09091	2.86667
ML	4.7																						0.9486	0.9443									43					0.147605				% area of pluton						% volume of pluton
			L:W				Pluton Thickness	Pluton L:W	Pluton Avg radius													y'				x'	W'	L'	A'									0.298927				Bins			Cumulative %	Relative %		Bins
Core complex L:W			LS				4.84242	2.43635	1.71817	0.540773	1.703	41.815	71.8455	29.489	50.6672	32230.8		18.2215	23.064	27.9064	20.4824	2.58152	1	1		42.867	24.9491	60.7848	4764.31	4764.31		4.37387	42.5758	186.221	7928.51	0.600908	0.600908	0.254074	40288.5			0	0	0	0	0		0	0
LS	1.5		HS				4.93943	2.53294	1.76647	0.571886	1.65132	35.1758	62.1369	24.5316	43.3342	23653.8		19.7807	24.7201	29.6595	24.8293	0.109165	1	1		43.3237	24.5256	62.1217	4786.44	4786.44		4.42642	42.1916	186.758	7879.62	0.607446	0.607446	0.187619	29567.3			0.01	64	64	0.00748626	0.00748626		0.01	2
HS	7		ML				5.53252	2.37445	1.68722	0.642318	1.69958	38.851	65.5503	27.6066	46.5784	31452.9		20.6638	26.1963	31.7288	24.9692	1.2271	1	1		45.4183	26.919	63.9177	5405.41	5405.41		3.83913	47.3137	181.644	8594.24	0.628958	0.628958	0.228735	39316.1			0.02	127	63	0.0148555	0.00736928		0.02	122
ML	4.1						5.1757	2.09632	1.54816	0.592181	1.58113	30.8075	47.6949	22.7517	35.2233	17644.3		19.0695	24.2452	29.4209	20.7664	3.47885	1	1		26.0798	16.8457	35.314	1868.9	1868.9		3.95538	43.8609	173.487	7609.28	0.245608	0.245608	0.144924	22055.4			0.03	212	85	0.0247982	0.00994268		0.03	462
			Top pluton depth				5.08593	2.22389	1.61195	0.597918	1.61791	31.9311	51.4712	23.1446	37.3079	19034.2		18.4664	23.5523	28.6383	22.0633	1.48901	1	1		35.6732	22.1305	49.2158	3421.73	3421.73		3.20312	39.8829	127.75	5095.03	0.671583	0.671583	0.23349	23792.7			0.04	314	102	0.0367294	0.0119312		0.04	1014
			LS	15			4.99208	2.51408	1.75704	0.621217	1.51945	23.7224	41.6813	16.5791	29.1302	10837.6		18.5038	23.4958	28.4879	21.144	2.35186	1	1		25.6949	14.6239	36.7658	1689.11	1689.11		3.57927	46.7963	167.497	7838.23	0.215497	0.215497	0.0864165	13547			0.05	419	105	0.0490116	0.0122821		0.05	1613
			HS	22			5.42216	1.94545	1.47272	0.651233	1.67285	34.6541	51.0359	26.2335	38.6347	22806.3		17.7772	23.1994	28.6215	22.8349	0.364526	1	1		38.5473	26.1742	50.9204	4187.11	4187.11		2.85063	42.566	121.34	5164.96	0.810677	0.810677	0.275974	28507.8			0.06	538	119	0.0629313	0.0139198		0.06	2262
			ML	18			4.15135	2.14998	1.57499	0.659287	1.48168	15.2769	24.0609	11.1912	17.6261	3511.79		19.1613	23.3127	27.464	21.1511	2.16153	1	1		15.0483	9.55452	20.542	616.597	616.597		4.84929	47.9479	232.513	11148.5	0.0553075	0.0553075	0.0196875	4389.74			0.07	671	133	0.0784887	0.0155574		0.07	2911
Area of CC nomralised to pluton							4.56027	2.6261	1.81305	0.633547	1.38317	15.3346	27.8024	10.5869	19.1947	4216.91		20.5982	25.1585	29.7188	23.3106	1.84789	1	1		17.5482	9.67881	25.4176	772.87	772.87		2.02756	46.0069	93.2818	4291.61	0.180088	0.180088	0.0614121	5271.14			0.08	827	156	0.0967365	0.0182477		0.08	3576
Half Thickness	km		Random line				5.17225	2.37664	1.68832	0.716956	1.74303	31.3215	52.8808	22.2502	37.5655	19118.8		20.5687	25.741	30.9132	24.7353	1.00565	1	1		36.8486	21.8256	51.8716	3556.68	3556.68		2.70571	40.9068	110.682	4527.64	0.785548	0.785548	0.263918	23898.5			0.09	1002	175	0.117207	0.0204702		0.09	4162
LS	1.5		LS				3.8793	2.04187	1.52094	0.638732	1.55434	16.5091	25.1093	12.2972	18.7033	3763.09		17.6225	21.5018	25.3811	22.4583	0.956506	1	1		18.1258	11.9175	24.3341	911.068	911.068		3.02531	47.7676	144.512	6902.99	0.131982	0.131982	0.0340712	4703.86			0.1	1202	200	0.140601	0.0233945		0.1	4680
HS	7		HS				4.74824	2.616	1.808	0.704574	1.54368	19.0155	34.3799	13.1422	23.7611	6739.94		17.1365	21.8848	26.633	15.9313	5.95347	0	0		#NUM!	#NUM!	#NUM!	#NUM!			2.61782	47.0509	123.171	5795.31	#VALUE!		0.0726874	8424.92			0.11	1372	170	0.160487	0.0198854		0.11	5189
ML	1.8		ML				4.40943	2.05681	1.52841	0.627475	1.70196	27.6182	42.2118	20.5229	31.3673	12000.6		19.7703	24.1797	28.5891	19.7795	4.40023	1	1		2.02514	1.325	2.72528	11.3443	11.3443		2.80241	46.85	131.293	6151.08	0.00184428	0.00184428	0.121936	15000.8			0.12	1565	193	0.183062	0.0225757		0.12	5632
							4.70357	1.93886	1.46943	0.652345	1.64767	25.9192	38.0865	19.6437	28.8651	11055.3		17.6735	22.3771	27.0807	23.8298	1.45271	1	1		27.4539	18.6833	36.2245	2126.21	2126.21		1.89074	39.1056	73.9386	2891.41	0.735354	0.735354	0.23897	13819.2			0.13	1782	217	0.208445	0.0253831		0.13	6053
Core complex L:W							4.85681	2.48792	1.74396	0.722357	1.58783	20.6103	35.9435	14.4472	25.1954	7923.28		17.3064	22.1632	27.02	23.6116	1.44843	1	1		24.0489	13.7898	34.3079	1486.28	1486.28		4.4551	43.5199	193.886	8437.87	0.176144	0.176144	0.0586884	9904.1			0.14	2024	242	0.236753	0.0283074		0.14	6393
LS	1.5		Core complex L:W				4.28763	1.62723	1.31362	0.661488	1.6554	22.0638	28.9833	17.8114	23.3974	6953.67		17.9779	22.2655	26.5531	23.7506	1.48509	1	1		21.9491	16.7089	27.1892	1427.23	1427.23		2.89506	41.709	120.75	5036.36	0.283385	0.283385	0.0862933	8692.09			0.15	2226	202	0.260381	0.0236285		0.15	6724
HS	8		LS	1.5			4.31596	2.2674	1.6337	0.656906	1.50318	16.9419	27.6781	12.2069	19.9425	4581.1		19.311	23.627	27.9429	21.8938	1.7332	1	1		18.2638	11.1794	25.3482	890.26	890.26		4.37489	47.7529	208.914	9976.25	0.0892379	0.0892379	0.0287001	5726.38			0.16	2430	204	0.284244	0.0238624		0.16	7009
ML	4.8		HS	7			4.198	1.65335	1.32668	0.786571	1.68254	16.7386	22.2067	13.4313	17.819	3933.62		18.5947	22.7927	26.9907	25.7926	2.99991	1	1		12.4649	9.39558	15.5342	458.525	458.525		2.39955	43.3461	104.011	4508.5	0.101702	0.101702	0.0545307	4917.03			0.17	2617	187	0.306118	0.0218739		0.17	7251
			ML	4.1			5.40379	1.93609	1.46804	0.657274	1.6343	31.2825	45.924	23.72	34.822	18492.8		18.3475	23.7513	29.1551	21.5081	2.24324	1	1		31.6798	21.5796	41.7801	2832.45	2832.45		3.9344	44.6147	175.532	7831.31	0.361683	0.361683	0.147587	23116			0.18	2825	208	0.330448	0.0243303		0.18	7463
							5.04161	2.26774	1.63387	0.75164	1.53875	18.701	30.5549	13.4737	22.0143	6520.61		19.3201	24.3617	29.4033	25.4397	1.07796	1	1		21.5052	13.1622	29.8483	1234.23	1234.23		3.5558	40.5487	144.183	5846.42	0.211109	0.211109	0.0697073	8150.77			0.19	3037	212	0.355246	0.0247982		0.19	7693
							4.42825	2.10599	1.553	0.617727	1.6343	25.0057	38.8337	18.4396	28.6367	9961.91		18.7559	23.1842	27.6124	21.7692	1.41496	1	1		27.1354	17.4729	36.7979	2019.94	2019.94		3.11535	44.472	138.546	6161.42	0.327837	0.327837	0.101051	12452.4			0.2	3256	219	0.380863	0.025617		0.2	7881
				0.0238153			4.3146	2.36968	1.68484	0.647275	1.5454	18.7578	31.604	13.3368	22.4704	5713.24		17.8758	22.1904	26.505	23.0217	0.831346	1	1		22.0493	13.0869	31.0118	1275.01	1275.01		2.98019	39.0987	116.522	4555.84	0.279862	0.279862	0.078378	7141.56			0.21	3482	226	0.407299	0.0264358		0.21	8060
							4.82075	2.14651	1.57325	0.469605	1.45528	29.6379	46.628	21.7227	34.1754	15340		16.9702	21.7909	26.6117	25.6072	3.8163	1	1		20.8808	13.2723	28.4892	1187.89	1187.89		4.33056	41.8922	181.417	7599.94	0.156303	0.156303	0.126153	19175			0.22	3665	183	0.428705	0.021406		0.22	8202
							4.45207	2.61486	1.80743	0.610808	1.56523	22.4007	40.4877	15.4837	27.9857	8768.18		17.0975	21.5496	26.0017	22.5313	0.981631	1	1		27.2969	15.1026	39.4913	1873.71	1873.71		3.13646	46.2606	145.095	6712.18	0.279151	0.279151	0.0816443	10960.2			0.23	3856	191	0.451047	0.0223418		0.23	8347
							4.6431	1.82636	1.41318	0.738943	1.70668	23.0286	32.5437	17.8188	25.1812	8458.7		17.6011	22.2442	26.8873	23.3347	1.09049	1	1		24.4769	17.3204	31.6334	1721.29	1721.29		4.10359	40.6746	166.912	6789.07	0.253538	0.253538	0.0778706	10573.4			0.24	4054	198	0.474208	0.0231606		0.24	8453
							5.34586	2.56951	1.78475	0.533403	1.57884	38.0503	67.9105	26.4294	47.1699	30143.3		17.8835	23.2294	28.5752	22.5702	0.659198	1	1		46.8099	26.2277	67.3922	5552.89	5552.89		3.47204	44.9008	155.897	6999.92	0.79328	0.79328	0.26914	37679.1			0.25	4213	159	0.492806	0.0185987		0.25	8565
							5.44218	2.06335	1.53168	0.624032	1.53413	27.7299	42.4733	20.5846	31.529	14947.9		20.997	26.4392	31.8814	24.0799	2.35935	1	1		28.412	18.5496	38.2744	2230.45	2230.45		3.59219	42.087	151.185	6362.91	0.350539	0.350539	0.146827	18684.9			0.26	4379	166	0.512224	0.0194175		0.26	8672
							4.66437	2.71306	1.85653	0.634769	1.68418	28.7605	53.3947	19.6806	36.5376	15398.5		16.1039	20.7682	25.4326	21.2802	0.511932	1	1		36.3169	19.5617	53.0721	3261.54	3261.54		3.55397	39.4653	140.258	5535.34	0.589221	0.589221	0.173866	19248.2			0.27	4540	161	0.531056	0.0188326		0.27	8777
							5.12794	1.77913	1.38956	0.657492	1.56796	25.0438	34.8	19.5601	27.18	10965.9		19.2748	24.4028	29.5307	20.1209	4.28183	1	1		14.9558	10.7629	19.1486	647.466	647.466		2.529	44.7269	113.114	5059.25	0.127977	0.127977	0.135468	13707.3			0.28	4713	173	0.551293	0.0202363		0.28	8865
							4.62268	2.21744	1.60872	0.714148	1.56467	18.5829	29.8948	13.4817	21.6882	5853.05		18.8495	23.4721	28.0948	23.4293	0.0427999	1	1		21.6873	13.4811	29.8935	1266.05	1266.05		2.04478	45.5135	93.0649	4235.71	0.298899	0.298899	0.0863646	7316.31			0.29	4863	150	0.568838	0.0175459		0.29	8937
							4.90856	2.14197	1.57099	0.748796	1.688	23.9005	37.5474	17.5294	27.5384	10149.6		19.2661	24.1747	29.0833	23.6004	0.574275	1	1		27.3493	17.409	37.2896	2039.44	2039.44		2.58294	40.7347	105.215	4285.91	0.475848	0.475848	0.148009	12687			0.3	5002	139	0.585098	0.0162592		0.3	9006
							5.10607	2.2376	1.6188	0.614	1.58462	28.6895	46.4426	20.7555	33.599	15462.8		17.9477	23.0538	28.1599	17.702	5.35176	0	1		#NUM!	#NUM!	#NUM!	#NUM!			2.7854	40.8268	113.719	4642.79	#VALUE!		0.208155	19328.4			0.31	5143	141	0.601591	0.0164932		0.31	9069
							4.64998	1.96381	1.48191	0.737699	1.58369	18.4617	27.3585	13.9313	20.6449	5567.81		19.4523	24.1023	28.7523	15.7889	8.31338	0	0		#NUM!	#NUM!	#NUM!	#NUM!			3.04148	40.8365	124.204	5072.04	#VALUE!		0.0686091	6959.76			0.32	5310	167	0.621125	0.0195344		0.32	9132
							4.83396	1.87771	1.43885	0.571059	1.54474	27.0975	38.9894	20.7643	29.8769	12294.7		18.7141	23.548	28.382	22.4738	1.07424	1	1		29.1298	20.2451	38.0145	2417.79	2417.79		2.55403	36.2749	92.647	3360.76	0.71942	0.71942	0.228645	15368.4			0.33	5451	141	0.637618	0.0164932		0.33	9181
							4.20501	1.79931	1.39966	0.580721	1.58201	22.9196	32.0796	17.8288	24.9542	7555.6		16.3933	20.5983	24.8033	25.0312	4.43294	1	1		#NUM!	#NUM!	#NUM!	#NUM!			4.94031	43.6164	215.479	9398.4	#VALUE!		0.0502452	9444.5			0.34	5584	133	0.653176	0.0155574		0.34	9240
							4.63416	2.07599	1.538	0.687519	1.78973	30.4174	46.7818	22.5347	34.6582	15347.9		20.4493	25.0834	29.7176	21.473	3.61046	1	1		21.7273	14.127	29.3276	1301.6	1301.6		2.11484	41.6501	88.0832	3668.68	0.354788	0.354788	0.261469	19184.9			0.35	5726	142	0.669786	0.0166101		0.35	9288
							5.5901	2.19337	1.59669	0.625582	1.73186	44.385	70.869	32.3105	51.5898	40213.3		16.4088	21.9989	27.589	21.757	0.241961	1	1		51.5414	32.2802	70.8026	7180.18	7180.18		4.80547	44.5509	214.088	9537.83	0.752811	0.752811	0.263512	50266.6			0.36	5839	113	0.683004	0.0132179		0.36	9338
							5.85901	1.90012	1.45006	0.549243	1.57837	41.9424	60.819	32.008	46.4135	35832.1		16.9909	22.8499	28.7089	22.8014	0.0485566	1	1		46.4119	32.0069	60.8169	6115.31	6115.31		4.33017	39.6958	171.89	6823.29			0.328215	44790.1			0.37	5966	127	0.697859	0.0148555		0.37	9380
							4.20781	2.60198	1.80099	0.511418	1.73406	38.6502	69.6086	26.7522	48.1804	24616.6		18.6056	22.8134	27.0212	22.2604	0.553052	1	1		47.7624	26.5201	69.0047	5749.15	5749.15		4.00305	39.6231	158.613	6284.75			0.244805	30770.7			0.38	6089	123	0.712247	0.0143876		0.38	9415
							4.95875	2.26527	1.63264	0.649088	1.70715	32.1759	52.5315	23.1899	37.8607	18977.6		20.5644	25.5232	30.4819	23.2569	2.26631	1	1		33.6752	20.6263	46.7241	3027.69	3027.69		2.82061	40.5519	114.381	4638.38	0.652748	0.652748	0.255715	23722			0.39	6193	104	0.724412	0.0121652		0.39	9451
							4.41192	1.95255	1.47627	0.464617	1.46127	26.8188	39.5919	20.2771	29.9345	11127.3		17.5472	21.9591	26.371	24.3171	2.35807	1	1		25.3001	17.1378	33.4624	1801.62	1801.62		2.95426	43.84	129.515	5677.93	0.317302	0.317302	0.122484	13909.1			0.4	6297	104	0.736577	0.0121652		0.4	9490
							3.89245	1.87982	1.43991	0.467933	1.61008	30.2928	43.6189	23.2038	33.4113	12376.7		17.8226	21.7151	25.6075	21.1296	0.585441	1	1		33.0313	22.9398	43.1227	3107.75	3107.75		3.26642	43.8317	143.173	6275.52	0.495218	0.495218	0.123264	15470.9			0.41	6395	98	0.748041	0.0114633		0.41	9525
							5.66289	1.74761	1.37381	0.625637	1.54823	30.2844	41.6049	23.8067	32.7058	17621		20.2875	25.9503	31.6132	25.0721	0.878215	1	1		32.3101	23.5187	41.1015	3036.83	3036.83		2.74176	41.7749	114.537	4784.75	0.63469	0.63469	0.230172	22026.3			0.42	6485	90	0.758568	0.0105275		0.42	9545
							4.5643	1.64807	1.32404	0.71118	1.78294	27.513	36.4281	22.1035	29.2658	11545.8		17.4126	21.9769	26.5412	22.4696	0.492719	1	1		29.0948	21.9743	36.2153	2500.1	2500.1		4.12977	40.3323	166.563	6717.89	0.372155	0.372155	0.107416	14432.2			0.43	6594	109	0.771318	0.01275		0.43	9562
							4.18899	2.39315	1.69658	0.641089	1.61389	20.6837	35.0915	14.6633	24.8774	6771.63		19.7523	23.9413	28.1303	24.206	0.264719	1	1		24.8277	14.634	35.0214	1610.08	1610.08		3.91862	43.5583	170.688	7434.9	0.216556	0.216556	0.0569244	8464.54			0.44	6671	77	0.780325	0.0090069		0.44	9586
							5.61483	1.8224	1.4112	0.688015	1.53544	25.1145	35.4415	19.4477	27.4446	12158.1		18.6338	24.2487	29.8635	22.6787	1.56996	1	1		26.35	18.672	34.0279	1996.07	1996.07		2.89566	38.6445	111.901	4324.37	0.461587	0.461587	0.175721	15197.7			0.45	6753	82	0.789917	0.00959177		0.45	9610
							3.68052	2.21817	1.60909	0.529102	1.68799	26.4188	42.5101	19.1645	30.8373	9419.95		18.5116	22.1921	25.8726	17.202	4.99014	0	0		#NUM!	#NUM!	#NUM!	#NUM!			2.69444	44.1887	119.064	5261.28	#VALUE!		0.111902	11774.9			0.46	6836	83	0.799626	0.00970874		0.46	9635
							5.07999	2.01494	1.50747	0.56018	1.39044	21.4483	32.3326	16.0464	24.1895	8280.04		19.6594	24.7394	29.8194	24.3784	0.361009	1	1		24.1284	16.0059	32.2508	1621.7	1621.7		2.45311	47.4302	116.352	5518.58	0.293862	0.293862	0.0937745	10350			0.47	6929	93	0.810504	0.0108785		0.47	9654
							5.6173	2.4187	1.70935	0.678304	1.47857	22.7761	38.9323	16.0964	27.5143	11059		17.4791	23.0964	28.7137	21.6252	1.4712	1	1		26.5539	15.5345	37.5733	1833.69	1833.69		3.14129	44.6547	140.273	6263.87	0.292741	0.292741	0.110345	13823.7			0.48	7008	79	0.819745	0.00924085		0.48	9667
							5.07243	1.93309	1.46655	0.696621	1.75368	32.5132	47.6821	24.6662	36.1741	18742.4		19.3575	24.4299	29.5024	23.7836	0.646345	1	1		35.8793	24.4652	47.2934	3634.95	3634.95		2.66271	46.952	125.02	5869.94	0.619248	0.619248	0.199559	23427.9			0.49	7087	79	0.828986	0.00924085		0.49	9685
							5.86748	2.17081	1.58541	0.628134	1.63877	38.9283	61.7171	28.4304	45.0738	32343.8		17.09	22.9575	28.825	22.5672	0.390345	1	1		44.9739	28.3675	61.5804	5487.98	5487.98		3.60993	48.3701	174.613	8446.03	0.649771	0.649771	0.239342	40429.7			0.5	7144	57	0.835653	0.00666745		0.5	9701
							4.40723	2.64589	1.82294	0.501935	1.65302	36.2792	66.1351	24.9954	45.5652	22888		17.2254	21.6326	26.0399	18.9564	2.67626	1	1		36.2023	19.8593	52.5454	3278.29	3278.29		4.36445	42.0534	183.54	7718.47	0.424734	0.424734	0.185335	28610			0.51	7219	75	0.844426	0.00877296
							5.09919	2.23753	1.61876	0.722949	1.72962	29.3356	47.4875	21.2232	34.3553	16145.1		17.2414	22.3406	27.4398	22.6769	0.336355	1	1		34.2805	21.177	47.3841	3152.43	3152.43		2.7399	43.7919	119.986	5254.4	0.599961	0.599961	0.192043	20181.4			0.52	7281	62	0.851679	0.00725231
					0.116307		4.42867	2.42731	1.71365	0.709218	1.56766	17.6629	30.2681	12.4698	21.369	5251.33		16.3795	20.8082	25.2368	20.7553	0.0528761	1	1		21.3674	12.4689	30.2659	1185.59	1185.59		4.31037	43.4109	187.117	8122.91	0.145956	0.145956	0.0404052	6564.16			0.53	7348	67	0.859516	0.00783717
							4.5099	1.86032	1.43016	0.71308	1.49538	15.7705	22.5543	12.1239	17.3391	3874.24		17.4371	21.947	26.4569	24.4291	2.48211	1	1		14.4768	10.1225	18.831	598.84	598.84		3.48567	40.0004	139.428	5577.19	0.107373	0.107373	0.0434162	4842.8			0.54	7404	56	0.866066	0.00655047
							4.0748	2.00995	1.50498	0.755419	1.53164	13.2141	19.8869	9.8942	14.8905	2518.85		16.7991	20.8739	24.9487	23.8507	2.97673	1	1		10.1686	6.75662	13.5805	288.267	288.267		2.65108	40.6543	107.778	4381.63	0.0657899	0.0657899	0.0359291	3148.57			0.55	7482	78	0.87519	0.00912387
							4.34756	2.09162	1.54581	0.655093	1.62634	21.7149	33.5671	16.0484	24.8077	7357.67		20.5453	24.8928	29.2404	24.7257	0.167118	1	1		24.7894	16.0365	33.5423	1689.87	1689.87		2.68599	41.3933	111.182	4602.17	0.367189	0.367189	0.0999212	9197.09			0.56	7537	55	0.881624	0.0064335
							4.28139	2.28446	1.64223	0.657967	1.6691	22.783	37.4149	16.378	26.8965	8242.18		20.1866	24.468	28.7494	21.0057	3.46226	1	1		15.8219	9.63442	22.0094	666.169	666.169		2.65393	40.2114	106.719	4291.31	0.155237	0.155237	0.120042	10302.7			0.57	7591	54	0.88794	0.00631653
							5.64198	1.95926	1.47963	0.635937	1.61636	34.0676	50.4074	25.7278	38.0676	22986.7		19.4354	25.0774	30.7194	25.5858	0.508391	1	1		37.9127	25.6231	50.2024	4041.15	4041.15		2.65629	41.824	111.096	4646.5			0.309194	28733.4			0.58	7646	55	0.894374	0.0064335
							5.03239	2.49937	1.74969	0.640797	1.65444	30.2564	52.9392	21.181	37.0601	17727.6		18.5252	23.5576	28.59	24.6915	1.13391	1	1		36.1071	20.6363	51.5779	3343.84	3343.84		3.54166	47.0745	166.722	7848.36	0.426056	0.426056	0.141172	22159.4			0.59	7698	52	0.900456	0.00608258
							4.2955	1.91369	1.45684	0.607949	1.51011	19.1561	27.9074	14.583	21.2452	5492		19.4373	23.7328	28.0283	21.4982	2.23458	1	1		18.1442	12.4545	23.8339	932.546	932.546		3.36079	38.0485	127.873	4865.37	0.19167	0.19167	0.0705496	6865			0.6	7742	44	0.905603	0.0051468
							5.01254	2.09003	1.54501	0.561106	1.79305	50.7239	78.3691	37.4967	57.9329	46275		19.3765	24.3891	29.4016	19.5509	4.83814	1	1		15.1488	9.805	20.4927	631.243	631.243		3.44688	44.2786	152.623	6757.91	0.0934079	0.0934079	0.42797	57843.7			0.61	7791	49	0.911335	0.00573166
							3.88088	1.99695	1.49847	0.632184	1.59495	18.0701	27.0776	13.5595	20.3186	4476.46		17.0557	20.9366	24.8175	24.3098	3.37317	1	1		10.0476	6.70523	13.39	282.062	282.062		4.25023	41.7979	177.651	7425.43	0.037986	0.037986	0.0376785	5595.58			0.62	7836	45	0.916598	0.00526377
							4.79596	2.3134	1.6567	0.652921	1.6165	25.1138	41.6061	17.9848	29.7955	11274.3		16.647	21.4429	26.2389	21.0103	0.432644	1	1		29.674	17.9115	41.4365	2331.66	2331.66		4.34976	46.141	200.702	9260.59	0.251783	0.251783	0.0760905	14092.9			0.63	7884	48	0.922213	0.00561469
							4.91625	2.15458	1.57729	0.593502	1.64711	32.5383	51.3223	23.8201	37.5712	18881.3		19.105	24.0212	28.9375	18.6582	5.36301	0	0		#NUM!	#NUM!	#NUM!	#NUM!			2.93651	44.69	131.233	5864.8	#VALUE!		0.201215	23601.7			0.64	7931	47	0.927711	0.00549772
							4.35191	1.68018	1.34009	0.761638	1.53315	14.4708	19.3922	11.5417	15.467	3060.04		16.2007	20.5526	24.9045	22.6424	2.08977	1	1		13.567	10.1239	17.0101	541.011	541.011		3.85063	41.9996	161.725	6792.38	0.0796497	0.0796497	0.0281569	3825.05			0.65	7967	36	0.931922	0.00421102
							4.76611	2.00918	1.50459	0.721454	1.57046	19.3958	29.1828	14.5247	21.8537	6346.7		17.3917	22.1578	26.9239	24.915	2.75727	1	1		17.8255	11.8474	23.8035	885.959	885.959		3.30533	38.5894	127.551	4922.11	0.179996	0.179996	0.0805892	7933.38			0.66	8001	34	0.935899	0.00397707
							4.06623	1.99417	1.49708	0.646162	1.67532	21.7937	32.6271	16.3612	24.4942	6819.24		19.9949	24.0611	28.1273	19.4544	4.60671	0	0		#NUM!	#NUM!	#NUM!	#NUM!			2.23345	41.3004	92.2422	3809.63	#VALUE!		0.111875	8524.06			0.67	8035	34	0.939876	0.00397707
							5.67459	2.30471	1.65235	0.626299	1.50565	27.6146	45.6291	19.7982	32.7136	16104.6		17.9859	23.6604	29.335	25.2215	1.56101	1	1		31.4515	19.0344	43.8687	2623.27	2623.27		3.99949	38.0847	152.32	5801.05	0.452206	0.452206	0.17351	20130.8			0.68	8066	31	0.943502	0.00362616
							5.41812	2.13846	1.56923	0.632054	1.82352	50.2941	78.9231	36.9065	57.9148	49579.9		16.051	21.4691	26.8872	24.2632	2.7941	1	1		49.6198	31.6205	67.6192	6717.2	6717.2		3.73849	43.6797	163.296	7132.73			0.434441	61974.9			0.69	8096	30	0.947011	0.00350918
							5.37399	2.83141	1.91571	0.656164	1.52719	24.8175	47.543	16.7913	32.1672	13477.8		17.7267	23.1007	28.4747	23.4718	0.37107	1	1		32.0904	16.7512	47.4296	2496.01	2496.01		3.58546	45.4754	163.05	7414.78	0.336626	0.336626	0.113606	16847.2			0.7	8137	41	0.951807	0.00479588
							5.19933	2.82479	1.91239	0.608188	1.68437	37.1261	70.9996	25.1345	48.0671	29149		18.9064	24.1057	29.3051	27.4191	3.31337	1	1		37.0425	19.3697	54.7153	3329.52	3329.52		4.3028	40.1696	172.842	6942.97	0.479552	0.479552	0.262396	36436.2			0.71	8170	33	0.955667	0.0038601
							3.86279	2.16308	1.58154	0.688652	1.61876	16.304	25.7854	11.9207	18.853	3730.14		17.2013	21.0641	24.9269	21.9147	0.850619	1	1		18.3902	11.628	25.1524	918.833	918.833		2.47468	41.434	102.536	4248.46	0.216274	0.216274	0.0548749	4662.68			0.72	8200	30	0.959177	0.00350918
							4.52599	2.20323	1.60161	0.55297	1.62474	30.4371	48.7485	22.126	35.4372	15336.5		19.2144	23.7404	28.2664	25.046	1.30554	1	1		33.9309	21.1855	46.6764	3106.6	3106.6		2.09136	41.9587	87.7507	3681.91	0.843747	0.843747	0.260336	19170.7			0.73	8227	27	0.962335	0.00315826
							4.67182	2.16148	1.58074	0.785911	1.40941	12.3322	19.494	9.0188	14.2564	2580.39		20.1898	24.8616	29.5334	22.6523	2.20935	1	1		12.5615	7.94657	17.1764	428.806	428.806		2.64347	41.546	109.826	4562.82	0.0939782	0.0939782	0.0353453	3225.49			0.74	8261	34	0.966312	0.00397707
							4.50345	2.27281	1.6364	0.590536	1.48034	20.235	33.1127	14.5691	23.8409	6825.29		17.1838	21.6872	26.1907	24.5848	2.89758	1	1		18.2506	11.1529	25.3484	888.152	888.152		2.29526	40.692	93.3987	3800.58	0.233688	0.233688	0.112241	8531.61			0.75	8286	25	0.969236	0.00292432
							4.44653	2.96196	1.98098	0.691189	1.58161	18.994	37.6267	12.7033	25.165	6677.06		17.1346	21.5812	26.0277	22.6279	1.0467	1	1		24.4579	12.3463	36.5694	1418.42	1418.42		3.26411	41.8477	136.595	5716.19	0.248141	0.248141	0.073006	8346.32			0.76	8318	32	0.972979	0.00374313
							5.399	1.88619	1.4431	0.652067	1.54542	26.2259	37.8466	20.065	28.9558	12880.4		18.3237	23.7227	29.1217	24.0214	0.298663	1	1		28.9115	20.0343	37.7886	2378.4	2378.4		3.3875	48.5175	164.353	7974	0.298269	0.298269	0.100956	16100.5			0.77	8353	35	0.977073	0.00409405
							4.26543	2.70749	1.85374	0.603394	1.76744	31.7099	58.782	21.7109	40.2464	17101.5		18.3487	22.6141	26.8795	21.341	1.27309	1	1		38.412	20.7213	56.1027	3652.17	3652.17		5.61589	44.4111	249.408	11076.5	0.329723	0.329723	0.0964967	21376.9			0.78	8384	31	0.980699	0.00362616
							5.37942	1.69339	1.3467	0.693481	1.4808	20.7714	27.9727	16.5188	22.2458	7809.06		19.379	24.7584	30.1379	25.1315	0.373032	1	1		22.1922	16.479	27.9054	1444.67	1444.67		3.43126	38.2933	131.394	5031.51	0.287125	0.287125	0.097002	9761.32			0.79	8412	28	0.983975	0.00327524
							5.02748	2.1336	1.5668	0.669028	1.6511	27.9386	43.7741	20.5166	32.1453	14184.8		18.4253	23.4528	28.4802	23.885	0.432232	1	1		32.0263	20.4406	43.612	2800.59	2800.59		2.65585	40.0698	106.419	4264.2	0.656768	0.656768	0.207905	17730.9			0.8	8451	39	0.988537	0.00456194
							5.6048	1.98487	1.49243	0.724663	1.80711	40.3161	60.1691	30.3139	45.2415	32116.2		18.971	24.5758	30.1806	24.9683	0.392458	1	1		45.1304	30.2395	60.0214	5702.04	5702.04		3.58684	39.4456	141.485	5580.97			0.359663	40145.3			0.81	8473	22	0.99111	0.0025734
							4.24787	1.77448	1.38724	0.58062	1.68152	28.3989	39.3961	22.2015	30.7988	11672.3		18.295	22.5428	26.7907	24.23	1.68718	1	1		28.2653	20.3752	36.1554	2314.33	2314.33		3.5247	44.0727	155.343	6846.4	0.338036	0.338036	0.106555	14590.4			0.82	8490	17	0.993099	0.00198854
							4.12229	2.69891	1.84946	0.85977	1.65757	13.4401	24.8568	9.20995	17.0334	2964.77		19.0118	23.1341	27.2564	23.2078	0.0736751	1	1		17.0307	9.20847	24.8529	718.975	718.975		3.60251	42.6587	153.678	6555.7	0.109672	0.109672	0.0282652	3705.97			0.83	8509	19	0.995321	0.00222248
							4.86455	2.34704	1.67352	0.69065	1.35758	14.1557	23.6899	10.0935	16.8917	3654.25		17.2973	22.1619	27.0264	20.7474	1.41448	1	1		16.1619	9.65739	22.6663	687.687	687.687		3.61103	40.8987	147.687	6040.19	0.113852	0.113852	0.0378118	4567.81			0.84	8530	21	0.997778	0.00245643
							5.668	1.90357	1.45178	0.825082	1.68394	25.6654	37.2607	19.5741	28.4174	12987.1		18.3617	24.0297	29.6977	23.8202	0.209495	1	1		28.398	19.5607	37.2352	2288.17	2288.17		3.04725	48.5919	148.072	7195.08	0.318019	0.318019	0.112812	16233.9			0.85	8549	19	1	0.00222248
							4.21731	2.70862	1.85431	0.611845	1.45657	16.6409	30.8573	11.3923	21.1248	4657.5		18.4269	22.6442	26.8615	23.3815	0.737214	1	1		20.7995	11.2168	30.3822	1070.63	1070.63		3.39268	47.2239	160.216	7566.01	0.141505	0.141505	0.0384739	5821.88			0.86	8549	0	1	0
							4.9355	2.65823	1.82912	0.637641	1.60161	26.5117	48.4929	18.2425	33.3677	13716.5		16.8758	21.8113	26.7468	22.9803	1.16894	1	1		32.4183	17.7235	47.1132	2623.26	2623.26		4.20568	45.2751	190.412	8620.94	0.30429	0.30429	0.099442	17145.7			0.87	8549	0	1	0
							4.62642	2.07513	1.53756	0.697825	1.63177	21.9025	33.6764	16.2286	24.9525	7943.33		20.0795	24.706	29.3324	19.1594	5.54653	0	0		#NUM!	#NUM!	#NUM!	#NUM!			3.34085	43.9653	146.881	6457.67	#VALUE!		0.0768789	9929.17			0.88	8549	0	1	0
							5.88167	2.18106	1.59053	0.782651	1.54889	22.7363	36.1627	16.5804	26.3715	11079.1		19.1947	25.0764	30.9581	19.4165	5.65994	1	1		7.17273	4.50966	9.83581	139.349	139.349		4.5121	40.4119	182.342	7368.8	0.0189107	0.0189107	0.0939699	13848.9			0.89	8549	0	1	0
							4.88991	2.03075	1.51538	0.710424	1.58299	21.1937	32.1164	15.815	23.9657	7802.73		17.7882	22.6781	27.568	20.3194	2.35875	1	1		20.9931	13.8534	28.1329	1224.39	1224.39		2.87905	45.2878	130.386	5904.88	0.207353	0.207353	0.0825877	9753.41			0.9	8549	0	1	0
							4.65175	2.18444	1.59222	0.52705	1.65755	36.9529	58.8371	26.9347	42.8859	23159.5		18.3218	22.9735	27.6253	19.623	3.3505	1	1		29.7499	18.6845	40.8152	2395.82	2395.82		2.97354	45.2441	134.535	6086.93	0.393601	0.393601	0.2378	28949.4			0.91	8549	0	1	0
							5.53592	2.06436	1.53218	0.764545	1.47985	18.722	28.6855	13.8956	21.2905	6932.33		16.6831	22.219	27.7549	25.0725	2.85347	1	1		18.2443	11.9074	24.5812	919.541	919.541		5.01815	41.5791	208.65	8675.5	0.105993	0.105993	0.0499418	8665.41			0.92	8549	0	1	0
							4.84691	1.88136	1.44068	0.721561	1.76729	28.9659	41.7305	22.1811	31.9558	14094.6		17.3577	22.2046	27.0515	24.592	2.38741	1	1		27.8104	19.3037	36.3171	2202.42	2202.42		3.94604	38.7766	153.014	5933.37	0.371193	0.371193	0.148467	17618.2			0.93	8549	0	1	0
							3.92154	2.06922	1.53461	0.709987	1.49656	12.9049	19.804	9.57077	14.6874	2335.11		15.5792	19.5007	23.4223	21.6188	2.1181	1	1		12.3607	8.05464	16.6668	421.745	421.745		3.77525	44.3186	167.314	7415.11	0.0568764	0.0568764	0.019682	2918.88			0.94	8549	0	1	0
							5.34406	1.73095	1.36547	0.601529	1.61328	33.9142	46.3089	26.7535	36.5312	20800.2		18.8399	24.184	29.528	24.3803	0.196328	1	1		36.5066	26.7355	46.2777	3886.95	3886.95		3.5763	44.5494	159.322	7097.69	0.547636	0.547636	0.18316	26000.2			0.95	8549	0	1	0
							4.18966	2.64788	1.82394	0.632885	1.35827	13.0299	23.7658	8.97542	16.3706	2807.61		19.6376	23.8272	28.0169	19.733	4.09422	1	1		3.47435	1.90486	5.04383	30.1838	30.1838		3.0319	46.8574	142.067	6656.9	0.00453421	0.00453421	0.02636	3509.51			0.96	8549	0	1	0
							5.29559	2.0364	1.5182	0.546281	1.62822	40.3864	61.3148	30.1093	45.7121	30713.6		18.3838	23.6793	28.9749	25.3775	1.69818	1	1		43.2979	28.5192	58.0766	5203.42	5203.42		3.95008	38.1108	150.541	5737.22			0.334587	38392			0.97	8549	0	1	0
							4.77464	2.02925	1.51462	0.654893	1.5898	23.5305	35.6399	17.5631	26.6015	9389.2		19.7663	24.5409	29.3155	24.0422	0.498744	1	1		26.456	17.467	35.4449	1945.02	1945.02		2.26027	45.4373	102.701	4666.43	0.41681	0.41681	0.125754	11736.5			0.98	8549	0	1	0
							4.48733	1.57948	1.28974	0.680204	1.5137	17.3879	22.4259	14.1983	18.3121	4488.72		16.7065	21.1939	25.6812	25.0477	3.8538	1	1		9.38094	7.2735	11.4884	262.514	262.514		2.50045	40.2385	100.615	4048.58	0.064841	0.064841	0.0692948	5610.9			0.99	8549	0	1	0
							4.57386	2.09906	1.54953	0.657146	1.5385	19.7866	30.66	14.6065	22.6333	6435.05		17.9809	22.5548	27.1287	21.9662	0.588556	1	1		22.4451	14.4851	30.4051	1383.62	1383.62		3.86946	45.6526	176.651	8064.57	0.171568	0.171568	0.0498713	8043.82			1	8549	0	1	0
							5.68058	2.55819	1.7791	0.725838	1.49915	21.8558	38.8836	15.1996	27.0416	10547.3		16.9629	22.6434	28.324	23.9876	1.34417	1	1		26.2737	14.768	37.7794	1752.77	1752.77		2.85748	39.2997	112.298	4413.29	0.397158	0.397158	0.149369	13184.2
							4.92968	2.42151	1.71075	0.686532	1.53926	20.7897	35.566	14.6875	25.1268	8090.08		20.6913	25.621	30.5507	20.6409	4.98013	0	1		#NUM!	#NUM!	#NUM!	#NUM!			4.27401	46.4544	198.546	9223.34	#VALUE!		0.0548207	10112.6
							4.80063	2.21175	1.60588	0.66072	1.56501	22.28	35.779	16.1767	25.9779	8729.05		15.9139	20.7146	25.5152	21.4129	0.698287	1	1		25.7016	16.0047	35.3984	1779.84	1779.84		2.60874	41.2228	107.539	4433.07	0.401492	0.401492	0.123067	10911.3
							4.54131	2.28802	1.64401	0.613378	1.51481	20.7517	34.1161	14.9107	24.5134	7257.53		17.9303	22.4716	27.0129	22.1349	0.336731	1	1		24.4459	14.8697	34.0221	1589.33	1589.33		4.18102	45.0537	188.37	8486.78	0.187271	0.187271	0.0534474	9071.92
							5.92684	2.21984	1.60992	0.644939	1.73038	46.439	74.7631	33.6795	54.2213	46884.1		17.1605	23.0874	29.0142	24.0552	0.967782	1	1		53.4936	33.2275	73.7597	7699.56	7699.56		2.52339	41.8501	105.604	4419.55			0.663023	58605.2
							5.41218	2.6493	1.82465	0.53559	1.51677	33.3927	60.9301	22.9985	41.9643	23826.1		16.8831	22.2952	27.7074	22.9341	0.638839	1	1		41.6709	22.8377	60.5041	4340.98	4340.98		2.77965	39.3927	109.498	4313.41			0.345233	29782.7
							4.74966	2.15175	1.57587	0.615007	1.72774	34.1867	53.8738	25.0373	39.4556	20126.9		16.3804	21.1301	25.8798	24.2243	3.09422	1	1		29.9342	18.9953	40.8731	2439.13	2439.13		4.86289	42.406	206.216	8744.8	0.278923	0.278923	0.143849	25158.7
							5.05008	2.68712	1.84356	0.702863	1.54471	21.0346	38.7786	14.4313	26.6049	8878.62		15.8542	20.9043	25.9544	22.9054	2.00105	1	1		24.4272	13.25	35.6044	1482.08	1482.08		3.44892	43.1279	148.745	6415.05	0.231031	0.231031	0.0865019	11098.3
							4.82871	2.18968	1.59484	0.58092	1.49935	23.9316	38.167	17.4304	27.7987	10092		18.5684	23.3971	28.2258	26.3605	2.96344	1	1		21.9479	13.7619	30.134	1302.82	1302.82		3.25404	42.593	138.599	5903.36	0.220691	0.220691	0.106846	12615
							4.32559	2.39139	1.6957	0.874031	1.45163	10.1902	17.2795	7.22571	12.2526	1696.71		16.6817	21.0073	25.3329	22.6378	1.63049	1	1		11.3488	6.69272	16.0049	336.517	336.517		1.86627	46.047	85.9361	3957.09	0.0850414	0.0850414	0.0267985	2120.88
							5.4813	2.68979	1.84489	0.687226	1.63836	30.0224	55.3882	20.592	37.9901	19640.4		16.517	21.9983	27.4796	25.249	3.25078	1	1		30.5879	16.5797	44.596	2322.86	2322.86		2.55251	47.8268	122.078	5838.62	0.397845	0.397845	0.210243	24550.5
							4.42377	2.14235	1.57117	0.593642	1.44664	18.2751	28.7134	13.4028	21.0581	5348.38		17.625	22.0488	26.4726	22.1252	0.0764427	1	1		21.055	13.4008	28.7091	1208.65	1208.65		4.65221	47.0208	218.751	10285.8	0.117506	0.117506	0.0324985	6685.48
							4.23577	1.82275	1.41138	0.573874	1.46548	18.7159	26.4151	14.4919	20.4535	5094.01		17.5693	21.805	26.0408	23.0381	1.23312	1	1		19.5676	13.8642	25.271	1100.69	1100.69		2.48836	44.6516	111.109	4961.2	0.22186	0.22186	0.064173	6367.51
							4.5649	1.90416	1.45208	0.674775	1.53128	18.6801	27.125	14.2451	20.6851	5541.38		17.3058	21.8707	26.4356	24.0881	2.21744	1	1		18.0807	12.4516	23.7098	927.474	927.474		2.47693	45.6713	113.125	5166.54	0.179515	0.179515	0.0670344	6926.73
							4.50005	2.32993	1.66497	0.548392	1.63606	31.3013	52.1157	22.3679	37.2418	16480.1		20.0397	24.5397	29.0398	25.3669	0.827225	1	1		36.6071	21.9867	51.2276	3538.46	3538.46		5.3816	43.8524	235.996	10349	0.341913	0.341913	0.0995275	20600.2
							4.68172	1.81031	1.40515	0.57768	1.70251	35.2455	49.5253	27.3574	38.4413	19927.7		20.5948	25.2765	29.9582	25.7053	0.42874	1	1		38.2798	27.2424	49.3172	4220.79	4220.79		2.98782	47.2026	141.033	6657.14	0.634025	0.634025	0.187089	24909.6
							3.83429	2.10411	1.55206	0.657102	1.5822	16.2948	25.2905	12.0196	18.655	3661.69		17.9259	21.7601	25.5944	25.2837	3.52358	1	1		7.35643	4.73979	9.97306	148.504	148.504		4.34361	47.1008	204.587	9636.22	0.015411	0.015411	0.0237495	4577.11
							5.7736	2.38923	1.69462	0.592248	1.63425	41.3221	70.0252	29.3086	49.6669	37226		17.4941	23.2677	29.0413	23.1297	0.138045	1	1		49.6527	29.3003	70.0052	6443.94	6443.94		3.20027	43.6812	139.792	6106.26			0.381023	46532.5
							4.35426	2.81302	1.90651	0.736545	1.55047	15.7226	29.9753	10.6559	20.3156	4369.36		18.178	22.5322	26.8865	24.0835	1.55126	1	1		18.9826	9.95674	28.0085	876.107	876.107		2.71712	48.8323	132.683	6479.23	0.135218	0.135218	0.0421478	5461.71
							4.43856	2.30823	1.65411	0.700623	1.61481	19.7102	32.6029	14.1246	23.3638	6421.33		19.434	23.8725	28.3111	21.6777	2.19477	1	1		20.3075	12.277	28.3381	1092.98	1092.98		3.08542	43.6296	134.616	5873.24	0.186095	0.186095	0.0683325	8026.66
							5.3372	2.40591	1.70295	0.634681	1.6271	31.9652	54.4353	22.6257	38.5305	20651.2		17.6409	22.9781	28.3152	23.4957	0.517635	1	1		38.3488	22.519	54.1786	3832.9	3832.9		1.80308	43.6691	78.7387	3438.45			0.375373	25814
							4.88575	1.58475	1.29237	0.591656	1.62752	31.0608	40.1422	25.3303	32.7362	15607.1		18.2969	23.1827	28.0684	20.7419	2.4408	1	1		28.3584	21.9429	34.774	2397.17	2397.17		4.54184	42.1007	191.215	8050.28	0.297774	0.297774	0.121169	19508.9
							5.24577	2.24209	1.62105	0.711276	1.7156	30.814	49.9509	22.2787	36.1148	18339.7		16.3232	21.5689	26.8147	25.473	3.9041	1	1		24.1216	14.8802	33.3629	1559.64	1559.64		2.02435	40.7586	82.5095	3362.97	0.463768	0.463768	0.340838	22924.6
							4.65071	2.90033	1.95017	0.697575	1.71786	26.0251	50.7533	17.4991	34.1262	12976.3		19.1682	23.8189	28.4696	19.4893	4.3296	1	1		12.4606	6.38953	18.5318	371.994	371.994		3.49536	38.6666	135.154	5225.94	0.0711822	0.0711822	0.155191	16220.4
							5.96066	1.94919	1.47459	0.608102	1.54253	33.8173	49.8668	25.5834	37.7251	23889.9		20.2297	26.1904	32.1511	18.576	7.61443	0	0		#NUM!	#NUM!	#NUM!	#NUM!			4.59506	39.1002	179.668	7025.04	#VALUE!		0.212543	29862.4
							5.7204	2.46537	1.73269	0.682258	1.61374	30.9208	53.576	21.7314	37.6537	20923.5		20.5135	26.2339	31.9542	22.002	4.23189	1	1		25.3348	14.6217	36.048	1655.88	1655.88		3.49253	41.456	144.787	6002.28	0.275876	0.275876	0.217871	26154.4
							4.50867	2.22093	1.61046	0.608919	1.51345	20.698	33.3334	15.0088	24.1711	7086.38		16.722	21.2306	25.7393	24.8247	3.59411	1	1		14.5939	9.06194	20.1259	572.962	572.962		2.89664	40.201	116.448	4681.32	0.122393	0.122393	0.0946098	8857.97
							4.54538	1.75662	1.37831	0.589643	1.57274	24.8309	34.2248	19.4833	26.854	9521.87		18.1784	22.7238	27.2692	21.8508	0.87296	1	1		26.3541	19.1206	33.5877	2017.58	2017.58		4.65733	42.8705	199.662	8559.62	0.235709	0.235709	0.0695261	11902.3
							4.02157	2.10503	1.55251	0.744242	1.71175	17.9542	27.8742	13.2417	20.558	4663.29		18.7524	22.774	26.7956	19.2134	3.56063	1	1		9.55657	6.15555	12.9576	250.577	250.577		2.91177	45.0834	131.273	5918.21	0.04234	0.04234	0.0492472	5829.11
							4.66574	1.76612	1.38306	0.557935	1.72179	38.732	53.5688	30.3313	41.95	23816.2		17.3734	22.0392	26.7049	20.579	1.4602	1	1		39.8427	28.8076	50.8777	4604.53	4604.53		2.9992	42.7782	128.301	5488.47	0.838946	0.838946	0.271208	29770.3
							4.50636	1.85749	1.42874	0.636425	1.52336	19.723	28.1792	15.1706	21.6749	6052.09		19.9407	24.4471	28.9534	25.4138	0.966674	1	1		21.1703	14.8174	27.5232	1281.21	1281.21		3.55943	43.1859	153.717	6638.42	0.193	0.193	0.0569798	7565.12
							4.20831	2.32609	1.66305	0.675389	1.63111	19.77	32.8784	14.1346	23.5065	6144.03		17.2158	21.4241	25.6324	22.6734	1.24925	1	1		22.4469	13.4975	31.3964	1331.32	1331.32		4.50759	45.2513	203.974	9230.12	0.144236	0.144236	0.0416031	7680.03
							4.84456	1.86407	1.43204	0.80813	1.42143	12.7512	18.2602	9.79586	14.028	2722.4		15.7744	20.6189	25.4635	20.9437	0.324739	1	1		13.9965	9.77383	18.2191	559.425	559.425		2.46083	46.1119	113.474	5232.49	0.106914	0.106914	0.032518	3403
							4.6032	1.96081	1.4804	0.62469	1.61745	25.2913	37.4414	19.0949	28.2681	10339		18.854	23.4572	28.0604	21.2621	2.19512	1	1		24.847	16.7839	32.91	1735.29	1735.29		2.17832	44.5706	97.089	4327.32	0.401009	0.401009	0.149328	12923.8
							4.18323	2.00816	1.50408	0.629168	1.5909	20.3659	30.632	15.2538	22.9429	6140.63		17.9817	22.1649	26.3481	25.6799	3.51502	1	1		12.4391	8.27024	16.608	431.503	431.503		2.30559	38.1527	87.9645	3356.08	0.128574	0.128574	0.114356	7675.79
							5.38139	2.04889	1.52444	0.539205	1.68685	48.4621	73.8778	36.0575	54.9676	45035.4		17.5049	22.8863	28.2677	23.2973	0.410998	1	1		54.8071	35.9522	73.662	8319.9	8319.9		2.36054	45.0927	106.443	4799.81			0.586422	56294.2
							4.59599	2.0945	1.54725	0.777716	1.67208	19.5034	30.1767	14.4076	22.2921	6277.58		16.448	21.044	25.64	19.5693	1.47464	1	1		21.1135	13.6458	28.5812	1225.27	1225.27		3.74472	44.7889	167.722	7512.07	0.163106	0.163106	0.0522291	7846.97
							4.84139	1.78961	1.39481	0.69252	1.56028	20.7832	28.9885	16.1982	22.5933	7141.88		15.706	20.5474	25.3888	23.278	2.73061	1	1		18.6568	13.3759	23.9377	1005.9	1005.9		2.02705	44.6975	90.6038	4049.76	0.248385	0.248385	0.110221	8927.35
							4.49819	2.00611	1.50306	0.661899	1.58472	20.839	31.3222	15.6134	23.4678	6910.96		18.3506	22.8488	27.347	23.5403	0.691449	1	1		23.1889	15.4278	30.95	1500.08	1500.08		2.42886	44.0083	106.89	4704.05	0.318892	0.318892	0.091822	8638.7
							5.04338	2.27533	1.63766	0.611888	1.60165	29.3217	48.0191	21.1042	34.5617	16056.7		18.6931	23.7364	28.7798	22.7319	1.00452	1	1		33.8692	20.6814	47.057	3057.41	3057.41		3.12283	48.0416	150.026	7207.49	0.424199	0.424199	0.139236	20070.8
							4.19738	1.94438	1.47219	0.655127	1.63442	20.8166	30.646	15.7613	23.2037	6369.33		16.0332	20.2306	24.4279	22.194	1.96339	1	1		20.5086	13.9307	27.0866	1185.43	1185.43		2.73007	44.7987	122.304	5479.05	0.216357	0.216357	0.0726555	7961.66
							4.10787	1.65221	1.3261	0.514922	1.6852	33.1011	43.8955	26.5678	35.2317	15050.2		17.6054	21.7132	25.8211	25.3039	3.5907	1	1		17.1135	12.9051	21.3219	864.446	864.446		4.37307	47.6297	208.288	9920.69	0.0871356	0.0871356	0.0948158	18812.8
							4.61635	2.36781	1.68391	0.697606	1.62761	21.6649	36.4817	15.4073	25.9445	8151.75		19.5847	24.2011	28.8174	19.1154	5.08566	0	0		#NUM!	#NUM!	#NUM!	#NUM!			2.50043	38.5609	96.4187	3717.99	#VALUE!		0.137032	10189.7
							4.6279	2.17776	1.58888	0.569382	1.70946	35.9401	57.1045	26.2217	41.6631	21770.3		16.4256	21.0535	25.6814	19.9305	1.12301	1	1		40.4178	25.4379	55.3977	4427.14	4427.14		2.28282	40.3869	92.1959	3723.51			0.36542	27212.9
							5.45291	1.81574	1.40787	0.666577	1.61227	29.6241	41.7069	22.9696	32.3383	16411.2		18.1236	23.5765	29.0294	24.0944	0.517904	1	1		32.1921	22.8658	41.5184	2982.47	2982.47		2.81379	40.2301	113.199	4554.02	0.65491	0.65491	0.22523	20514
							5.49356	2.14754	1.57377	0.626502	1.5281	27.5991	43.4346	20.2253	31.83	15161.2		19.5212	25.0147	30.5083	25.0715	0.0567619	1	1		31.8283	20.2242	43.4323	2759.52	2759.52		3.94773	47.9915	189.457	9092.35	0.303499	0.303499	0.104217	18951.5
							4.96425	1.97221	1.4861	0.790291	1.47674	15.0848	22.4176	11.3668	16.8922	3974.01		17.6111	22.5754	27.5396	19.4279	3.14748	1	1		13.0629	8.79002	17.3357	478.72	478.72		2.69622	41.1675	110.997	4569.46	0.104765	0.104765	0.0543555	4967.51
							5.17585	1.99549	1.49775	0.614107	1.79424	45.8139	68.6177	34.3863	51.502	38366.6		17.9691	23.145	28.3208	20.5851	2.55992	1	1		44.7617	29.886	59.6374	5599.35	5599.35		5.03403	39.6609	199.654	7918.47	0.707125	0.707125	0.302825	47958.2
							5.10052	1.91949	1.45975	0.689688	1.71095	30.6726	44.7741	23.326	34.0501	16735.3		18.591	23.6915	28.792	21.2004	2.49111	1	1		29.7127	20.3547	39.0707	2498.43	2498.43		4.90586	40.2836	197.626	7961.08	0.31383	0.31383	0.131383	20919.1
							4.36011	2.50585	1.75292	0.626122	1.55026	20.2591	35.5126	14.1719	24.8422	6893.77		19.7686	24.1287	28.4888	24.6182	0.489523	1	1		24.6852	14.0823	35.288	1561.17	1561.17		3.01655	40.8365	123.185	5030.45	0.310344	0.310344	0.0856506	8617.21
							4.43824	1.95508	1.47754	0.70036	1.54968	17.4854	25.8353	13.2145	19.5249	4760.2		17.0619	21.5001	25.9384	21.9342	0.434119	1	1		19.4313	13.1511	25.7114	1062.28	1062.28		3.05843	44.0624	134.762	5937.92	0.178898	0.178898	0.0501038	5950.25
							4.33683	2.45262	1.72631	0.601613	1.72757	30.3395	52.3754	21.3548	36.8651	15238.6		17.6367	21.9736	26.3104	25.8442	3.87068	1	1		16.6269	9.63147	23.6224	714.77	714.77		4.64864	46.1782	214.666	9912.87	0.0721052	0.0721052	0.0960786	19048.3
							5.01379	2.28385	1.64193	0.677781	1.69837	29.9234	49.132	21.5127	35.3224	16648.5		18.671	23.6848	28.6985	22.7311	0.953618	1	1		34.6776	21.12	48.2351	3200.43	3200.43		2.24161	43.3113	97.0868	4204.95	0.761109	0.761109	0.247454	20810.7
							5.48515	1.96311	1.48155	0.71442	1.55841	23.9641	35.5042	18.0857	26.7949	11065		21.0085	26.4937	31.9788	24.4479	2.04576	1	1		24.8616	16.7807	32.9424	1736.67	1736.67		2.7684	40.355	111.719	4508.4	0.385206	0.385206	0.153395	13831.3
							4.31901	2.67249	1.83625	0.557137	1.67852	31.111	57.1274	21.3761	39.2518	16569.4		19.8733	24.1923	28.5114	21.3755	2.8168	1	1		29.7552	16.2044	43.306	2204.6	2204.6		2.07546	39.9419	82.8978	3311.1	0.665821	0.665821	0.312763	20711.8
							5.80057	2.42388	1.71194	0.60278	1.68032	44.903	76.8712	31.7142	54.2927	44426		16.726	22.5266	28.3272	18.4904	4.03624	1	1		38.9931	22.7772	55.209	3950.57	3950.57		2.69183	42.0953	113.313	4769.96	0.828219	0.828219	0.582107	55532.5
							5.44122	1.89604	1.44802	0.638131	1.62152	32.3062	46.7801	24.6725	35.7263	19729.7		18.1257	23.5669	29.0081	21.9294	1.63755	1	1		34.07	23.5287	44.6114	3297.56	3297.56		3.60346	43.4372	156.524	6798.98	0.485008	0.485008	0.181367	24662.2
							4.57414	2.69291	1.84645	0.66314	1.78936	31.677	58.4901	21.7201	40.1051	18255.8		17.3173	21.8914	26.4656	21.3697	0.521732	1	1		39.8433	21.5783	58.1083	3939.18	3939.18		2.90375	39.453	114.562	4519.8			0.252442	22819.8
							4.5853	1.70494	1.35247	0.74775	1.50739	15.3899	20.8144	12.2083	16.5113	3660.46		18.5099	23.0952	27.6805	20.526	2.56918	1	1		13.6761	10.1119	17.2402	547.68	547.68		4.07003	38.985	158.67	6185.75	0.088539	0.088539	0.0369848	4575.58
							5.26959	2.03449	1.51724	0.632254	1.55024	26.7667	40.6116	19.9616	30.2866	13420.6		19.6555	24.9251	30.1947	23.1201	1.80507	1	1		28.4543	18.7539	38.1546	2247.96	2247.96		2.21888	43.0652	95.5566	4115.16	0.546263	0.546263	0.203828	16775.7
							4.00435	1.75163	1.37582	0.72168	1.61055	15.7962	21.7326	12.4071	17.0698	3392.06		19.2768	23.2812	27.2855	22.1211	1.16007	1	1		16.3378	11.875	20.8007	776	776		4.18038	43.8611	183.356	8042.19	0.0964911	0.0964911	0.0263615	4240.08
							4.82897	2.64223	1.82112	0.682495	1.73673	29.9085	54.4668	20.6139	37.5404	17033.2		17.968	22.797	27.626	24.212	1.41498	1	1		35.8926	19.7091	52.076	3224.45	3224.45		3.88702	44.8972	174.516	7835.3	0.411528	0.411528	0.135869	21291.5
							5.55881	2.20171	1.60086	0.659123	1.81706	48.1535	77.0868	35.0122	56.0495	47133.7		18.6171	24.1759	29.7347	22.4983	1.67759	1	1		53.4362	33.3798	73.4926	7706.85	7706.85		3.98023	46.9774	186.981	8783.87			0.335371	58917.2
							5.65307	2.38034	1.69017	0.691147	1.47026	21.9747	37.141	15.6032	26.3721	10292		16.7969	22.45	28.1031	22.1196	0.330377	1	1		26.327	15.5765	37.0775	1814.39	1814.39		3.52149	44.6211	157.133	7011.44	0.258776	0.258776	0.0917432	12865
							5.37805	2.71568	1.85784	0.630778	1.62595	32.61	60.5842	22.309	41.4466	22835.7		19.2564	24.6345	30.0125	24.0261	0.60832	1	1		41.1806	22.1658	60.1954	4191.76	4191.76		2.88051	37.9174	109.221	4141.38			0.344627	28544.6
							5.0504	1.80026	1.40013	0.661372	1.49508	20.892	29.2515	16.2485	22.75	7541.15		16.249	21.2994	26.3498	24.1993	2.8999	1	1		18.6259	13.303	23.9488	1000.88	1000.88		3.35993	46.5884	156.534	7292.67	0.137245	0.137245	0.0646296	9426.44
							4.89588	2.67419	1.83709	0.816814	1.55929	16.3182	29.978	11.2101	20.5941	5168.85		16.7307	21.6265	26.5224	21.1154	0.511131	1	1		20.4815	11.1489	29.8142	1044.25	1044.25		4.55046	41.0484	186.789	7667.4	0.136193	0.136193	0.0421334	6461.07
							4.23162	2.34458	1.67229	0.667919	1.47053	15.1024	25.2556	10.7719	18.0137	3616.65		17.5201	21.7517	25.9833	24.3556	2.60385	1	1		14.1997	8.49115	19.9082	531.066	531.066		3.22264	43.3193	139.603	6047.49	0.0878159	0.0878159	0.0373776	4520.81
							4.21006	2.77287	1.88643	0.67605	1.73643	23.9475	45.1754	16.292	30.7337	9734.5		17.1738	21.3838	25.5939	26.1539	4.77007	1	0		#NUM!	#NUM!	#NUM!	#NUM!			3.40653	43.7991	149.203	6534.94	#VALUE!		0.0931005	12168.1
							4.7174	1.74333	1.37166	0.558267	1.56022	27.9321	38.3135	21.9772	30.1454	12478.9		20.0457	24.7631	29.4805	20.5355	4.22763	1	1		13.3753	9.75116	16.9995	520.764	520.764		4.28209	41.6395	178.304	7424.5	0.0701413	0.0701413	0.105048	15598.7
							5.53452	2.65978	1.82989	0.695286	1.63993	30.0217	54.9364	20.6545	37.7955	19729		20.1518	25.6863	31.2208	20.4896	5.19671	1	1		13.0022	7.10547	18.899	421.872	421.872		3.23281	43.2673	139.875	6052	0.0697078	0.0697078	0.203744	24661.2
							4.73687	1.72177	1.36088	0.668969	1.55298	20.9008	28.4436	16.52	22.4818	6992.56		17.2481	21.985	26.7219	20.1386	1.84641	1	1		20.7035	15.2133	26.1938	1251.9	1251.9		3.31396	42.2723	140.089	5921.89	0.211403	0.211403	0.0737999	8740.7
							4.51574	1.79797	1.39899	0.578955	1.55855	24.5672	34.3691	19.1155	26.7423	9320.37		18.0626	22.5784	27.0941	19.3122	3.26619	1	1		18.4668	13.2001	23.7334	984.209	984.209		4.14746	38.4356	159.41	6127.04	0.160634	0.160634	0.0950742	11650.5
							4.94448	2.04237	1.52119	0.73063	1.59628	21.1635	32.1936	15.7629	23.9782	7882.7		19.1112	24.0557	29.0002	24.9064	0.850706	1	1		23.6207	15.5278	31.7135	1547.05	1547.05		3.09707	49.1612	152.256	7485.08	0.206685	0.206685	0.0658201	9853.38
							4.83098	2.26841	1.63421	0.738317	1.55526	18.5681	30.3442	13.3768	21.8605	6160.45		16.4758	21.3067	26.1377	21.4247	0.117933	1	1		21.854	13.3728	30.3351	1274.44	1274.44		3.502	41.427	145.077	6010.11	0.212049	0.212049	0.0640634	7700.57
							4.63942	2.24462	1.62231	0.608798	1.60036	25.7929	41.8441	18.6419	30.243	11369.4		16.0588	20.6982	25.3376	20.4798	0.21842	1	1		30.2095	18.6213	41.7977	2445.18	2445.18		3.53062	45.0402	159.02	7162.28	0.341397	0.341397	0.0992126	14211.8
							4.7726	2.42653	1.71327	0.693541	1.48104	17.4037	29.8172	12.288	21.0526	5493.53		18.0592	22.8318	27.6044	19.1903	3.64145	1	1		13.6086	7.94306	19.2741	480.963	480.963		3.67853	46.2032	169.96	7852.71	0.061248	0.061248	0.0437232	6866.92
							4.31628	2.23698	1.61849	0.584893	1.54219	21.8107	35.3003	15.7804	25.5404	7553.62		19.9932	24.3095	28.6258	24.3832	0.073739	1	1		25.5366	15.7781	35.2952	1749.52	1749.52		2.8329	41.4745	117.493	4872.97	0.359025	0.359025	0.0968816	9442.02
							4.91369	2.01934	1.50967	0.640921	1.60332	26.1999	39.5532	19.5872	29.5702	11959.4		16.1004	21.0141	25.9277	21.4042	0.390147	1	1		29.4768	19.5253	39.4283	2418.55	2418.55		2.4579	42.7721	105.13	4496.61	0.537861	0.537861	0.166228	14949.3
							5.39161	2.34337	1.67168	0.651889	1.63859	31.877	53.2882	22.74	38.0141	20525.3		19.0662	24.4578	29.8494	22.4044	2.0534	1	1		35.1492	21.0262	49.2722	3254.72	3254.72		5.40675	37.7019	203.844	7685.31	0.423499	0.423499	0.16692	25656.6
							4.80121	1.72864	1.36432	0.721754	1.63732	22.2562	30.3647	17.5656	23.9651	8045.12		17.3645	22.1657	26.9669	21.2432	0.922509	1	1		23.5186	17.2383	29.7989	1613.78	1613.78		2.43832	41.3988	100.943	4178.94	0.38617	0.38617	0.120322	10056.4
							4.26304	2.41801	1.709	0.674031	1.56567	17.954	30.6835	12.6896	21.6866	5214.62		17.9157	22.1787	26.4417	21.2286	0.950106	1	1		21.1411	12.3704	29.9118	1162.46	1162.46		4.79171	37.2487	178.485	6648.32	0.17485	0.17485	0.049022	6518.27
							3.90272	1.60477	1.30238	0.656602	1.75326	22.7583	29.64	18.47	24.055	6712.15		19.3876	23.2904	27.1931	22.4564	0.833986	1	1		23.4993	18.0433	28.9553	1641.33	1641.33		2.93171	44.3508	130.024	5766.66	0.284623	0.284623	0.0727474	8390.19
							4.88924	2.46539	1.73269	0.599212	1.38568	18.3344	31.7679	12.8856	22.3268	6287.59		19.7515	24.6408	29.53	21.6747	2.96603	1	1		17.7492	10.2437	25.2547	812.733	812.733		3.61088	41.7534	150.766	6295	0.129108	0.129108	0.0624264	7859.49
							4.34349	1.83159	1.41579	0.503548	1.5957	31.1351	44.0809	24.067	34.074	14476.4		19.4877	23.8312	28.1747	23.4786	0.352587	1	1		33.9615	23.9876	43.9354	3310.94	3310.94		3.00314	41.8278	125.615	5254.19	0.630153	0.630153	0.172201	18095.5
							4.23494	1.97179	1.4859	0.743281	1.52982	14.3244	21.2845	10.7945	16.0395	3056.78		17.7044	21.9393	26.1743	21.5087	0.430679	1	1		15.9564	10.7385	21.1742	714.336	714.336		3.90842	45.1987	176.656	7984.61	0.0894641	0.0894641	0.0239271	3820.98
							4.71786	2.2163	1.60815	0.62548	1.52012	21.5751	34.6961	15.6549	25.1755	8050.58		16.6557	21.3735	26.0914	23.3768	2.00322	1	1		22.7934	14.1737	31.4131	1398.76	1398.76		2.78006	39.466	109.718	4330.13	0.32303	0.32303	0.1162	10063.2
							4.85107	2.88195	1.94097	0.627003	1.57143	24.9068	48.3435	16.7746	32.5591	12358.9		19.3776	24.2286	29.0797	21.2474	2.98122	1	1		25.6852	13.2331	38.1372	1585.48	1585.48		2.86406	42.5273	121.801	5179.86	0.306086	0.306086	0.149121	15448.6
							4.35272	2.45275	1.72637	0.553387	1.26456	13.574	23.4337	9.55408	16.4939	3061.54		17.742	22.0948	26.4475	20.5612	1.53351	1	1		15.4364	8.9415	21.9312	616.06	616.06		3.26794	42.5147	138.935	5906.79	0.104297	0.104297	0.0323943	3826.93
							4.51241	1.8423	1.42115	0.70096	1.65479	21.7897	30.9665	16.8086	23.8875	7378.72		20.232	24.7444	29.2569	24.1803	0.564152	1	1		23.7001	16.6767	30.7235	1609.65	1609.65		2.45012	41.2903	101.166	4177.17	0.385344	0.385344	0.110403	9223.4
							4.47256	2.05119	1.52559	0.69509	1.75715	26.3441	40.1904	19.5938	29.8921	11064.9		18.271	22.7436	27.2161	26.6608	3.91728	1	1		14.4256	9.45571	19.3954	576.16	576.16		3.78179	40.3203	152.483	6148.17	0.0937124	0.0937124	0.112482	13831.1
							4.4023	2.05747	1.52873	0.562006	1.66383	30.716	46.9566	22.8225	34.8895	14821.4		18.3523	22.7545	27.1568	22.5363	0.218225	1	1		34.8466	22.7944	46.8988	3358.46	3358.46		2.25562	44.4694	100.306	4460.55	0.752926	0.752926	0.207673	18526.7
							5.55636	2.21942	1.60971	0.662404	1.46293	22.4521	36.1414	16.2842	26.2128	10273.3		15.9807	21.537	27.0934	17.4129	4.12409	1	1		17.5664	10.9128	24.2201	830.35	830.35		3.27802	36.0814	118.275	4267.54	0.194574	0.194574	0.150457	12841.7
							5.50202	2.14579	1.5729	0.67459	1.54194	25.436	40.0081	18.6449	29.3265	12893.8		17.4418	22.9438	28.4458	21.2036	1.74027	1	1		27.8209	17.6877	37.9541	2109.02	2109.02		2.43281	39.7884	96.7978	3851.43	0.547594	0.547594	0.209237	16117.2
							5.32696	2.04309	1.52155	0.655235	1.58214	27.5342	41.8946	20.5055	31.2001	14376.6		19.5987	24.9256	30.2526	20.6996	4.22602	1	1		18.9944	12.4836	25.5052	1000.28	1000.28		4.50772	43.1156	194.353	8379.66	0.11937	0.11937	0.107229	17970.8
							3.99156	2.74871	1.87435	0.549386	1.61388	24.5459	46.0076	16.7379	31.3728	9656.59		17.2685	21.2601	25.2516	25.245	3.98489	1	1		1.81226	0.96687	2.65764	8.07262	8.07262		3.74496	38.6138	144.607	5583.81	0.00144572	0.00144572	0.108087	12070.7
							3.98457	1.8898	1.4449	0.64373	1.54404	16.6871	24.1112	12.7586	18.4349	3850.8		17.72	21.7046	25.6891	21.4451	0.259524	1	1		18.3957	12.7315	24.06	962.329	962.329		2.42435	42.2449	102.416	4326.56	0.222424	0.222424	0.0556274	4813.51
							5.09768	1.7101	1.35505	0.688548	1.71718	31.1157	42.1634	24.6555	33.4094	16648.4		18.4268	23.5245	28.6222	21.2431	2.28135	1	1		29.8771	22.0487	37.7055	2611.78	2611.78		2.31631	43.26	100.203	4334.79	0.602516	0.602516	0.24004	20810.4
							5.12101	2.33976	1.66988	0.544414	1.55429	32.5826	54.409	23.2541	38.8316	20355.2		18.0489	23.1699	28.2909	22.5157	0.654216	1	1		38.5134	23.0636	53.9632	3909.98	3909.98		3.38435	44.9509	152.129	6838.35	0.571772	0.571772	0.186039	25444
							4.33543	1.91978	1.45989	0.655801	1.78968	29.3768	42.8869	22.3395	32.6132	13049.1		19.2855	23.621	27.9564	23.0592	0.561807	1	1		32.3382	22.1512	42.5253	2959.33	2959.33		3.143	45.3635	142.577	6467.81	0.457548	0.457548	0.126097	16311.4
							4.25012	1.9956	1.4978	0.63072	1.52427	18.3213	27.4417	13.7511	20.5964	5038.47		17.1799	21.43	25.6801	21.2457	0.184287	1	1		20.577	13.7381	27.4159	1183.26	1183.26		3.24037	43.9851	142.528	6269.1	0.188745	0.188745	0.0502312	6298.09
							5.6717	2.76113	1.88057	0.60015	1.57251	34.191	64.2984	23.287	43.7927	26679.4		19.1741	24.8458	30.5175	15.4596	9.38625	0	0		#NUM!	#NUM!	#NUM!	#NUM!			2.8439	45.4221	129.176	5867.44	#VALUE!		0.284189	33349.3
							4.6589	1.99284	1.49642	0.627025	1.58874	24.1985	36.2112	18.1706	27.1909	9630.45		19.305	23.9639	28.6228	19.7111	4.25277	1	1		11.1033	7.41988	14.7867	344.681	344.681		4.85802	44.3768	215.583	9566.89	0.0360285	0.0360285	0.0629152	12038.1
							4.8733	1.8593	1.42965	0.54394	1.54689	29.721	42.4907	22.853	32.6718	14866.5		18.7564	23.6297	28.503	18.869	4.76067	1	1		6.98343	4.8847	9.08215	139.372	139.372		3.13324	43.3909	135.954	5899.18	0.0236257	0.0236257	0.157506	18583.2
							4.25092	1.93298	1.46649	0.497295	1.6071	31.4486	46.1191	23.8591	34.9891	14694.9		17.3574	21.6083	25.8592	23.0455	1.43719	1	1		32.9287	22.4541	43.4033	3061.74	3061.74		3.20875	44.4353	142.582	6335.66	0.483255	0.483255	0.144962	18368.6
							4.3902	2.20128	1.60064	0.599901	1.57222	22.8576	36.5869	16.6207	26.6038	8387.04		19.0903	23.4805	27.8707	22.3517	1.12873	1	1		25.7095	16.062	35.357	1784.12	1784.12		3.53313	42.93	151.677	6511.51	0.273995	0.273995	0.0805022	10483.8
							5.65423	2.17167	1.58584	0.602791	1.69157	44.1118	69.9541	32.2121	51.0831	40027.2		15.6497	21.3039	26.9581	22.0761	0.772164	1	1		50.6045	31.9103	69.2988	6947.14	6947.14		3.52301	45.794	161.333	7388.08			0.338613	50034
							5.48298	1.74422	1.37211	0.476564	1.5466	43.7305	60.0032	34.4011	47.2021	35556		16.9191	22.402	27.885	24.1482	1.74611	1	1		44.7446	32.61	56.8792	5827.13	5827.13		3.77805	38.3562	144.912	5558.27			0.39981	44445
							4.27439	2.88508	1.94254	0.573788	1.652	27.5895	53.5937	18.5762	36.0849	13368.8		20.6839	24.9583	29.2327	20.2539	4.70445	0	0		#NUM!	#NUM!	#NUM!	#NUM!			5.5825	46.0376	257.005	11831.9	#VALUE!		0.0706186	16711
							5.7256	1.71608	1.35804	0.697937	1.66938	33.5601	45.5759	26.5582	36.0671	21772.3		18.004	23.7296	29.4552	25.3728	1.64319	1	1		34.5498	25.441	43.6587	3489.43	3489.43		3.15474	43.4295	137.009	5950.23	0.586437	0.586437	0.228692	27215.4
							4.23427	2.56021	1.78011	0.631278	1.54437	18.9023	33.6481	13.1427	23.3954	5882.68		17.4704	21.7046	25.9389	24.7631	3.05847	1	1		16.1795	9.08908	23.27	664.455	664.455		2.05098	40.8004	83.6808	3414.2	0.194615	0.194615	0.107688	7353.35
							5.22564	2.17772	1.58886	0.779945	1.54527	18.902	30.0326	13.7908	21.9117	6799.43		21.1581	26.3837	31.6094	22.107	4.27676	1	1		12.591	7.92455	17.2575	429.637	429.637		4.30145	39.8059	171.223	6815.67	0.0630366	0.0630366	0.0623511	8499.29
							4.18032	2.71248	1.85624	0.571451	1.40906	16.5103	30.6471	11.2985	20.9728	4547.48		18.5308	22.7111	26.8914	21.6596	1.05152	1	1		20.2984	10.9353	29.6616	1019	1019		2.60895	42.6301	111.22	4741.31	0.214919	0.214919	0.0599449	5684.35
							4.32191	2.43749	1.71875	0.426136	1.57305	38.2553	65.7511	26.9749	46.363	24081.7		16.9668	21.2887	25.6106	19.6362	1.65252	1	1		42.84	24.9252	60.7549	4757.4	4757.4		3.06674	41.3626	126.848	5246.78			0.286863	30102.2
							4.14226	1.86895	1.43448	0.635484	1.63162	21.2987	30.5524	16.3473	23.4499	6499.5		18.4522	22.5945	26.7367	25.0994	2.50493	1	1		18.6763	13.0196	24.333	995.272	995.272		2.65782	41.6997	110.83	4621.59	0.215353	0.215353	0.0878958	8124.37
							4.9084	1.88116	1.44058	0.675715	1.4074	16.2938	23.4725	12.4777	17.9751	4516.31		20.4885	25.3969	30.3053	20.8652	4.5317	1	1		6.90583	4.79379	9.01788	135.81	135.81		3.10228	44.4974	138.043	6142.57	0.0221097	0.0221097	0.045953	5645.39
							3.93898	1.65888	1.32944	0.694932	1.62378	16.7273	22.238	13.4054	17.8217	3688.99		19.2355	23.1745	27.1135	23.5809	0.406357	1	1		17.7266	13.3338	22.1193	926.567	926.567		3.18386	43.2211	137.61	5947.67	0.155787	0.155787	0.0387651	4611.24
							4.69653	1.73323	1.36662	0.607253	1.68313	31.2828	42.7516	24.6658	33.7087	15558.8		16.9284	21.6249	26.3215	23.8475	2.22253	1	1		29.6954	21.7291	37.6616	2570.94	2570.94		4.25403	40.6134	172.77	7016.79	0.366398	0.366398	0.138585	19448.5
							4.85511	2.80712	1.90356	0.625139	1.57326	25.1506	47.8756	17.0551	32.4653	12454.2		19.9949	24.85	29.7052	18.9931	5.85691	0	0		#NUM!	#NUM!	#NUM!	#NUM!			3.35396	47.4311	159.082	7545.44	#VALUE!		0.10316	15567.8
							4.77624	2.20344	1.60172	0.663699	1.68331	27.7198	44.3994	20.15	32.2747	13424.2		15.6022	20.3784	25.1547	20.2771	0.101322	1	1		32.2674	20.1455	44.3894	2809.35	2809.35		3.3953	45.5744	154.739	7052.14	0.398369	0.398369	0.118973	16780.2
							4.68964	2.62573	1.81287	0.777219	1.62912	18.6933	33.8885	12.9063	23.3974	6443.82		16.9189	21.6086	26.2982	21.9769	0.368307	1	1		23.3251	12.8664	33.7838	1365.58	1365.58		5.1854	45.7633	237.301	10859.7	0.125748	0.125748	0.0370857	8054.77
							4.74989	1.91819	1.4591	0.523145	1.63193	36.6008	53.4042	27.8409	40.6225	22186.6		18.9203	23.6701	28.42	23.8941	0.223944	1	1		40.5773	27.8099	53.3448	4660.6	4660.6		2.83231	42.8545	121.377	5201.57			0.266586	27733.3
							4.67211	2.09847	1.54924	0.564393	1.79991	44.8948	69.5527	33.1444	51.3485	33836.6		15.8765	20.5486	25.2207	22.4556	1.907	1	1		46.8764	30.2578	63.4951	6035.69	6035.69		3.56571	44.9072	160.126	7190.82	0.839361	0.839361	0.294096	42295.8
							3.88134	1.81431	1.40716	0.859095	1.45346	8.95215	12.5971	6.94317	9.77012	1066.5		20.7686	24.65	28.5313	24.2964	0.353543	1	1		9.72951	6.91431	12.5447	272.495	272.495		4.21155	44.82	188.761	8460.29	0.0322088	0.0322088	0.00787869	1333.12
							4.94831	2.12148	1.56074	0.667511	1.71754	31.2073	48.7065	22.9587	35.8326	17383.7		17.2177	22.166	27.1143	22.1483	0.0176599	1	1		35.8324	22.9586	48.7062	3513.01	3513.01		4.94532	47.0467	232.661	10945.9	0.320942	0.320942	0.0992588	21729.6
							5.53355	2.66545	1.83273	0.536674	1.69643	52.3576	95.9571	36.0003	65.9787	60053.3		17.9506	23.4842	29.0177	19.9712	3.51295	1	1		50.9777	27.8152	74.1402	6478.67	6478.67		3.29292	41.9015	137.978	5781.49			0.649198	75066.6
							5.0778	2.05791	1.52895	0.67666	1.60145	25.2205	38.561	18.7379	28.6494	11526.4		16.5072	21.585	26.6628	20.2005	1.38449	1	1		27.564	18.028	37.0999	2101.21	2101.21		2.21013	41.1101	90.8586	3735.2	0.562543	0.562543	0.192868	14408
							5.34112	2.67538	1.83769	0.644795	1.76907	42.1099	77.3849	28.9248	53.1549	37558.6		17.8832	23.2243	28.5654	17.5148	5.70945	0	0		#NUM!	#NUM!	#NUM!	#NUM!			3.38455	39.3456	133.167	5239.53	#VALUE!		0.44802	46948.2
							3.93417	2.33793	1.66896	0.614504	1.42917	14.203	23.7042	10.139	16.9216	2970.47		18.7543	22.6885	26.6226	19.8091	2.87933	1	1		11.531	6.90909	16.1529	350.608	350.608		2.72783	47.0621	128.377	6041.71	0.0580313	0.0580313	0.0307287	3713.08
							5.62541	2.85123	1.92562	0.520581	1.70034	57.2251	110.194	38.6477	74.4206	75263.4		19.8633	25.4887	31.1141	22.7929	2.69579	1	1		65.3187	33.9209	96.7165	10306.7	10306.7		3.54931	44.2178	156.943	6939.66			0.677838	94079.3
							5.02586	1.83396	1.41698	0.58079	1.60381	31.8479	45.1279	24.6068	34.8674	17533.2		19.7704	24.7963	29.8222	25.1994	0.40308	1	1		34.755	24.5275	44.9826	3466.15	3466.15		3.75959	46.2587	173.914	8045.01	0.430845	0.430845	0.136212	21916.5
							4.51312	2.50141	1.75071	0.792556	1.48245	13.18	23.0743	9.22449	16.1494	3017.85		16.6455	21.1586	25.6718	23.3469	2.1883	1	1		14.124	8.06759	20.1804	511.474	511.474		3.62314	42.448	153.795	6528.28	0.0783474	0.0783474	0.0288921	3772.31
							3.84002	1.94215	1.47108	0.766086	1.55949	12.3518	18.1704	9.35582	13.7631	2050.84		17.0167	20.8568	24.6968	24.7656	3.9088	1	1		#NUM!	#NUM!	#NUM!	#NUM!			4.60044	41.12	189.17	7778.68	#VALUE!		0.016478	2563.55
							4.05407	2.26986	1.63493	0.589297	1.61194	22.3919	36.6092	16.1284	26.3688	7520.07		18.0491	22.1032	26.1572	26.3015	4.19834	1	1		#NUM!	#NUM!	#NUM!	#NUM!			2.72611	45.4425	123.881	5629.47	#VALUE!		0.08349	9400.09
							4.90813	1.77476	1.38738	0.531005	1.58598	34.0229	47.2028	26.5967	36.8997	19358		16.0994	21.0076	25.9157	22.2166	1.20908	1	1		35.7626	25.777	45.7481	3704.72	3704.72		3.28334	40.422	132.719	5364.77	0.690566	0.690566	0.225523	24197.5
							4.55987	1.96527	1.48264	0.729241	1.44008	14.0093	20.7707	10.5689	15.6698	3144.74		19.0468	23.6067	28.1666	23.1016	0.505123	1	1		15.5734	10.5039	20.6429	681.192	681.192		3.47507	42.9383	149.214	6407	0.10632	0.10632	0.0306768	3930.92
							4.33968	2.35053	1.67526	0.559513	1.59591	26.2902	44.043	18.7375	31.3903	11251.1		18.539	22.8787	27.2183	18.8285	4.05019	1	1		11.2728	6.72895	15.8166	334.357	334.357		3.43915	41.1213	141.422	5815.48	0.0574942	0.0574942	0.120918	14063.9
							4.93132	2.39063	1.69532	0.725936	1.51058	18.0677	30.6305	12.8127	21.7216	6080.06		17.4848	22.4162	27.3475	22.9977	0.581552	1	1		21.57	12.7233	30.4167	1215.8	1215.8		3.24997	40.1261	130.409	5232.8	0.232342	0.232342	0.0726197	7600.08
							5.24312	1.93852	1.46926	0.695608	1.7157	31.9931	47.0061	24.2485	35.6273	18774.9		16.5039	21.747	26.9901	19.6782	2.06881	1	1		32.7366	22.281	43.1921	3023.36	3023.36		3.39509	41.2019	139.884	5763.49	0.524571	0.524571	0.203597	23468.7
							4.94134	1.80274	1.40137	0.634549	1.64866	29.4836	41.3174	22.9192	32.1183	14700.3		18.8214	23.7627	28.7041	24.28	0.517298	1	1		31.9418	22.7933	41.0904	2942.37	2942.37		4.74067	37.4682	177.624	6655.26	0.442111	0.442111	0.138052	18375.4
							4.85772	2.02583	1.51291	0.596473	1.68181	34.0303	51.4849	25.4143	38.4496	19968.2		19.0383	23.8961	28.7538	22.8959	1.00018	1	1		37.6258	24.8697	50.3818	3936.36	3936.36		2.78017	45.7423	127.171	5817.1	0.676687	0.676687	0.214542	24960.3
							5.17617	2.10754	1.55377	0.644912	1.58014	26.8687	41.7478	19.8088	30.7783	13447.8		20.8186	25.9948	31.171	22.6981	3.29673	1	1		23.7283	15.2714	32.1851	1544.13	1544.13		3.96431	38.0065	150.67	5726.42	0.26965	0.26965	0.146773	16809.7
							4.4484	2.42263	1.71132	0.524538	1.37177	18.7752	32.1303	13.2626	22.6964	5955.19		16.1634	20.6118	25.0602	20.615	0.00321299	1	1		22.6964	13.2626	32.1303	1338.73	1338.73		3.034	43.7526	132.745	5807.96	0.230499	0.230499	0.0640844	7443.99
							5.31976	1.84244	1.42122	0.739956	1.71996	29.7483	42.2789	22.9473	32.6131	16214.2		21.0303	26.3501	31.6699	25.1677	1.18244	1	1		31.7972	22.3732	41.2213	2897.34	2897.34		3.92536	46.311	181.787	8418.74	0.344154	0.344154	0.120373	20267.8
							5.21275	2.50529	1.75265	0.632691	1.81915	46.3566	81.2466	32.43	56.8383	43148.9		17.9358	23.1486	28.3613	18.8474	4.30113	1	1		32.1115	18.3217	45.9013	2642.05	2642.05		5.48458	47.1418	258.553	12188.6	0.216764	0.216764	0.221256	53936.1
							3.83766	2.33493	1.66746	0.830698	1.61977	11.9271	19.8881	8.51764	14.2029	2042.34		18.1077	21.9453	25.783	24.7926	2.84726	1	1		9.52274	5.71091	13.3346	239.24	239.24		2.22495	43.8333	97.5269	4274.92	0.0559636	0.0559636	0.0298593	2552.93
							4.12058	2.8248	1.9124	0.722804	1.64647	17.5643	33.5899	11.8911	22.7405	5170.57		18.0781	22.1987	26.3193	22.5705	0.371776	1	1		22.6478	11.8426	33.4529	1244.6	1244.6		4.06957	42.0383	171.078	7191.83	0.173058	0.173058	0.0449345	6463.22
							4.34861	2.28363	1.64182	0.684261	1.37482	12.7104	20.8682	9.13815	15.0032	2605.21		18.4422	22.7908	27.1394	23.3878	0.596993	1	1		14.8611	9.05163	20.6706	587.799	587.799		4.1026	44.1284	181.041	7989.06	0.0735755	0.0735755	0.0203811	3256.51
							5.27896	1.84964	1.42482	0.672288	1.52162	23.0059	32.7793	17.722	25.2507	9634.1		18.2263	23.5052	28.7842	24.9616	1.45639	1	1		24.2707	17.0342	31.5072	1686.09	1686.09		2.01105	47.2091	94.9399	4482.03	0.37619	0.37619	0.134344	12042.6
							4.50217	1.62375	1.31188	0.761538	1.46387	13.4807	17.685	10.8915	14.2882	2724.35		15.7865	20.2887	24.7908	23.2009	2.91225	1	1		10.8964	8.30596	13.4868	351.924	351.924		4.58623	39.8855	182.924	7296.02	0.0482351	0.0482351	0.0233376	3405.44
							4.18067	1.84843	1.42422	0.727022	1.50873	14.0016	19.9413	10.7882	15.3648	2825.52		18.5595	22.7401	26.9208	23.6441	0.903966	1	1		15.0013	10.533	19.4696	644.257	644.257		4.1372	39.2208	162.264	6364.13	0.101232	0.101232	0.0277485	3531.91
							4.62135	2.42178	1.71089	0.619058	1.57438	23.6858	40.5239	16.7331	28.6285	9844.77		16.7554	21.3767	25.9981	24.9073	3.53055	1	1		18.4728	10.7972	26.1484	886.96	886.96		3.53072	46.3346	163.594	7580.07	0.117012	0.117012	0.0811732	12306
							4.98555	1.67449	1.33725	0.725049	1.48522	17.5243	23.4343	13.9949	18.7146	5136.72		16.0614	21.0469	26.0325	20.9734	0.073546	1	1		18.7126	13.9934	23.4318	1030.1	1030.1		3.3967	41.4663	140.849	5840.48	0.176372	0.176372	0.0549689	6420.9
							5.0286	2.229	1.6145	0.544473	1.61328	36.1056	58.2925	26.1518	42.2221	24083.1		18.9829	24.0115	29.0401	24.8578	0.846329	1	1		41.6199	25.7788	57.4609	4653.55	4653.55		3.49443	43.3692	151.551	6572.62	0.708021	0.708021	0.229009	30103.8
							4.67983	2.96399	1.98199	0.677896	1.53512	19.412	38.4744	12.9806	25.7275	7342.55		17.7838	22.4636	27.1435	22.4358	0.0278371	1	1		25.7271	12.9804	38.4737	1568.92	1568.92		3.60706	39.8342	143.685	5723.57	0.274116	0.274116	0.0801789	9178.19
							4.81776	2.54686	1.77343	0.460897	1.5726	40.0738	71.068	27.9042	49.4861	30015		15.9488	20.7666	25.5843	20.8268	0.060224	1	1		49.4822	27.902	71.0624	6229.1	6229.1		2.23153	41.1338	91.7912	3775.72			0.496842	37518.7
							4.36011	1.87032	1.43516	0.813678	1.68936	17.046	24.4637	13.08	18.7718	4383.05		19.7479	24.108	28.4682	22.4369	1.67113	1	1		17.3383	12.0811	22.5955	857.586	857.586		4.01556	41.5707	166.929	6939.37	0.123583	0.123583	0.0394763	5478.81
							4.12313	2.11751	1.55876	0.720909	1.57079	15.475	24.1217	11.3915	17.7566	3559.31		19.7157	23.8389	27.962	20.6301	3.20881	1	1		11.1504	7.15338	15.1474	340.407	340.407		3.4071	42.1562	143.63	6054.91	0.05622	0.05622	0.0367399	4449.13
							4.35248	1.90804	1.45402	0.671645	1.63401	21.1913	30.8126	16.1488	23.4807	6803.88		18.3635	22.716	27.0684	23.9591	1.24313	1	1		22.5026	15.4761	29.5291	1435.7	1435.7		2.35915	45.6825	107.772	4923.28	0.291614	0.291614	0.0863738	8504.85
							3.69336	2.10473	1.55237	0.679327	1.53889	13.5397	21.0185	9.98631	15.5024	2435.44		17.9674	21.6607	25.3541	23.6975	2.03674	1	1		12.9321	8.33059	17.5337	458.88	458.88		4.41081	47.4699	209.381	9939.29	0.0461683	0.0461683	0.0153145	3044.31
							4.06976	2.8078	1.9039	0.665794	1.70146	21.7639	41.4362	14.7575	28.0968	7818.29		19.3498	23.4196	27.4893	22.8538	0.565751	1	1		27.824	14.6143	41.0338	1883.95	1883.95		2.70288	47.4558	128.267	6087.02	0.309502	0.309502	0.0802762	9772.87
							4.54022	2.23392	1.61696	0.666821	1.57321	20.4453	33.0592	14.7987	23.929	6978.2		17.7951	22.3353	26.8755	21.8555	0.479789	1	1		23.795	14.7159	32.8741	1519.81	1519.81		3.02379	41.3987	125.181	5182.33	0.293268	0.293268	0.0841586	8722.75
							3.93327	2.05947	1.52973	0.689905	1.73076	20.342	31.1179	15.1097	23.1138	5809.9		17.1241	21.0573	24.9906	18.7288	2.32853	1	1		18.6281	12.1774	25.0789	959.426	959.426		3.51995	45.6368	160.639	7331.06	0.130871	0.130871	0.0495316	7262.38
							4.54607	1.81898	1.40949	0.616139	1.5491	22.1082	31.1612	17.1312	24.1462	7624.08		17.5337	22.0797	26.6258	22.7082	0.628466	1	1		23.9143	16.9667	30.862	1645.02	1645.02		2.54504	49.4283	125.797	6217.91	0.264561	0.264561	0.0766342	9530.1
							5.02393	1.85368	1.42684	0.516824	1.4394	26.4054	37.6763	20.3252	29.0007	12086.4		19.7429	24.7668	29.7907	24.411	0.355732	1	1		28.928	20.2742	37.5817	2393.7	2393.7		5.01131	43.2259	216.618	9363.53	0.255641	0.255641	0.0806745	15108
							4.19495	1.7179	1.35895	0.682383	1.6172	18.8574	25.6262	14.9172	20.2717	5037.88		18.5516	22.7466	26.9415	22.1661	0.580445	1	1		20.0767	14.7737	25.3797	1177.95	1177.95		3.21077	41.6769	133.815	5576.97	0.211216	0.211216	0.0564584	6297.35
							4.51485	2.88655	1.94327	0.790122	1.71554	19.8872	38.6463	13.3884	26.0173	7338.87		16.1853	20.7002	25.215	20.752	0.0518009	1	1		26.0156	13.3875	38.6437	1625.28	1625.28		4.86732	41.792	203.415	8501.13	0.191184	0.191184	0.0539551	9173.59
							4.59652	2.17192	1.58596	0.705331	1.64945	22.0149	34.9148	16.0755	25.4951	8105.01		17.3737	21.9702	26.5667	24.3071	2.33688	1	1		21.9544	13.8429	30.0658	1307.53	1307.53		4.22204	38.588	162.92	6286.76	0.207981	0.207981	0.0805761	10131.3
							4.57783	2.00831	1.50415	0.534418	1.78986	46.724	70.2801	34.9947	52.6374	35370.8		20.3285	24.9063	29.4841	20.8699	4.0364	1	1		24.832	16.509	33.1551	1719.57	1719.57		2.89969	38.3665	111.251	4268.32	0.402869	0.402869	0.517926	44213.5
							5.01675	2.35093	1.67547	0.637268	1.55403	24.6928	41.372	17.5981	29.485	11474.8		20.3881	25.4049	30.4216	24.9873	0.417555	1	1		29.3827	17.537	41.2284	2271.45	2271.45		2.11654	45.1895	95.6453	4322.17	0.525535	0.525535	0.165929	14343.5
							3.82011	2.82801	1.914	0.647871	1.65706	18.9196	36.2123	12.8049	24.5086	5564.89		15.5097	19.3298	23.15	21.3177	1.9879	1	1		20.9288	10.9345	30.923	1062.26	1062.26		3.6665	40.7491	149.407	6088.19	0.17448	0.17448	0.057128	6956.12
							4.51324	1.83109	1.41554	0.69937	1.60347	19.882	28.1438	15.37	21.7569	6133.32		20.0665	24.5798	29.093	25.5262	0.946389	1	1		21.2732	15.0283	27.5181	1299.21	1299.21		2.36055	43.5563	102.817	4478.33	0.29011	0.29011	0.0855973	7666.65
							5.14185	2.58897	1.79449	0.730684	1.51527	19.2322	34.5119	13.3303	23.9211	7431.55		20.4686	25.6104	30.7523	23.7969	1.81348	1	1		22.3839	12.4737	32.2942	1265.52	1265.52		3.05123	48.0708	146.675	7050.8	0.179487	0.179487	0.0658751	9289.44
							3.99804	1.58874	1.29437	0.622649	1.47721	15.5954	20.1862	12.7058	16.446	3221.47		18.8885	22.8865	26.8845	23.82	0.933473	1	1		15.9915	12.3546	19.6283	761.838	761.838		3.44355	46.0536	158.588	7303.55	0.104311	0.104311	0.0275677	4026.84
							4.36727	1.90793	1.45396	0.658053	1.75008	27.4461	39.9056	20.9157	30.4107	11451.6		15.5646	19.9318	24.2991	22.8623	2.93044	1	1		22.5482	15.5081	29.5884	1441.55	1441.55		4.08946	41.7525	170.745	7129.02	0.202209	0.202209	0.100396	14314.5
							5.0617	1.74261	1.3713	0.610835	1.61549	30.4526	41.7598	23.964	32.8619	15913.4		18.6024	23.6641	28.7258	23.3663	0.29779	1	1		32.805	23.9225	41.6875	3133.01	3133.01		4.90175	37.4787	183.711	6885.25	0.455032	0.455032	0.144452	19891.8
							5.155	2.88621	1.9431	0.696687	1.78686	35.7376	69.4419	24.0599	46.7509	27057.9		16.1201	21.2751	26.4301	20.0198	1.25537	1	1		45.3435	23.3356	67.3514	4937.59	4937.59		2.42902	42.224	102.563	4330.62			0.390503	33822.4
							4.66834	2.01774	1.50887	0.712836	1.87168	33.6989	50.8473	25.2001	38.0237	18792.4		19.7726	24.441	29.1093	19.9139	4.52712	1	1		9.28184	6.15151	12.4122	239.872	239.872		3.80654	45.7631	174.199	7971.89	0.0300897	0.0300897	0.147333	23490.5
							4.62549	2.40309	1.70155	0.720503	1.58552	19.0696	32.4478	13.5025	22.9752	6366.61		19.1888	23.8143	28.4398	19.9751	3.83916	1	1		12.8147	7.53122	18.0982	428.205	428.205		3.78213	41.2751	156.108	6443.36	0.0664567	0.0664567	0.0617555	7958.26
							4.71388	2.55568	1.77784	0.691973	1.53478	19.0073	33.7919	13.2223	23.5071	6616.77		20.172	24.8859	29.5997	24.0735	0.812337	1	1		23.1554	13.0244	33.2863	1361.99	1361.99		2.2363	45.3531	101.423	4599.85	0.296095	0.296095	0.0899048	8270.97
							4.31105	1.86936	1.43468	0.779924	1.7244	19.073	27.3637	14.638	21.0008	5424.86		19.6427	23.9537	28.2648	24.0775	0.123747	1	1		20.9922	14.6319	27.3524	1257.32	1257.32		4.88819	41.6994	203.834	8499.77	0.147925	0.147925	0.0398897	6781.07
							4.15503	1.97848	1.48924	0.715552	1.54389	15.1157	22.511	11.3779	16.9444	3343.34		20.1984	24.3535	28.5085	23.0748	1.27868	1	1		16.1221	10.8257	21.4185	728.443	728.443		2.59821	43.1685	112.161	4841.82	0.150448	0.150448	0.043157	4179.17
							5.56284	2.39968	1.69984	0.488812	1.69044	61.0057	103.7	43.2141	73.4569	78315.8		19.9243	25.4872	31.05	17.3613	8.12585	0	0		#NUM!	#NUM!	#NUM!	#NUM!			4.07479	43.6688	177.941	7770.48	#VALUE!		0.629915	97894.7
							5.10824	3.00317	2.00159	0.8227	1.52331	16.1446	32.3149	10.7603	21.5376	5580.16		15.9552	21.0634	26.1717	23.6578	2.5944	1	1		18.553	9.26915	27.8369	810.607	810.607		3.60413	39.7638	143.314	5698.7	0.142244	0.142244	0.0611999	6975.2
							4.9959	2.51209	1.75605	0.672361	1.54419	22.1311	38.8631	15.4704	27.1668	9436.35		18.2451	23.241	28.2369	23.2328	0.00815653	1	1		27.1668	15.4704	38.8631	1888.81	1888.81		5.31353	40.0894	213.017	8539.71	0.22118	0.22118	0.0690622	11795.4
							4.18673	2.05302	1.52651	0.619968	1.64864	23.3109	35.5843	17.3327	26.4585	8112.39		15.9556	20.1423	24.329	24.3424	4.20007	1	1		#NUM!	#NUM!	#NUM!	#NUM!			3.42431	44.8854	153.702	6898.95	#VALUE!		0.073493	10140.5
							4.74454	2.48004	1.74002	0.749665	1.60789	19.4289	33.8067	13.6315	23.7191	6868.97		17.0549	21.7995	26.544	24.1806	2.38116	1	1		20.5156	11.7905	29.2408	1083.1	1083.1		4.37984	44.2236	193.692	8565.76	0.126446	0.126446	0.0501194	8586.21
							4.22063	2.30735	1.65368	0.738691	1.47642	13.1075	21.6756	9.39412	15.5348	2699.93		16.6442	20.8648	25.0854	23.9289	3.06415	1	1		10.6833	6.46034	14.9063	302.534	302.534		3.18199	41.7303	132.785	5541.17	0.0545976	0.0545976	0.0304531	3374.92
							4.987	1.978	1.489	0.77601	1.79618	28.2658	42.0877	21.2779	31.6828	14030.5		19.1215	24.1085	29.0955	26.5108	2.40231	1	1		27.7646	18.6465	36.8827	2160.57	2160.57		3.58337	46.8026	167.711	7849.33	0.275256	0.275256	0.111718	17538.2
							5.08921	2.12032	1.56016	0.742627	1.53359	19.1379	29.8581	14.0819	21.97	6722.4		17.9925	23.0817	28.1709	24.0345	0.952761	1	1		21.5816	13.8329	29.3302	1274.62	1274.62		2.05475	41.6077	85.4936	3557.19	0.358321	0.358321	0.118113	8402.99
							4.53295	1.97768	1.48884	0.666254	1.58814	21.0141	31.2867	15.8199	23.5533	7048.45		17.4433	21.9762	26.5092	22.3627	0.386478	1	1		23.4675	15.7623	31.1727	1543.63	1543.63		2.79915	39.2651	109.909	4315.59	0.357687	0.357687	0.102078	8810.56
							5.68045	1.93189	1.46594	0.760422	1.57558	23.7681	34.8426	18.0356	26.4391	11214.3		18.7182	24.3987	30.0791	25.7435	1.34488	1	1		25.6874	17.5228	33.852	1863.54	1863.54		3.01058	41.8443	125.976	5271.37	0.35352	0.35352	0.132963	14017.9
							4.36907	2.46479	1.7324	0.769464	1.58437	15.665	27.138	11.0102	19.0741	4101.22		16.1237	20.4927	24.8618	22.4881	1.99532	1	1		16.9688	9.79498	24.1426	742.912	742.912		3.62905	43.4614	157.724	6854.89	0.108377	0.108377	0.0373932	5126.52
							4.59081	2.62823	1.81411	0.667843	1.41961	15.4353	28.0014	10.6541	19.3277	4302.64		17.7976	22.3884	26.9792	23.7226	1.3342	1	1		18.4935	10.1942	26.7928	858.068	858.068		2.03128	42.3964	86.119	3651.13	0.235014	0.235014	0.0736525	5378.3
							4.43329	1.89638	1.44819	0.462529	1.51571	30.747	44.5274	23.4802	34.0038	14561.5		18.1791	22.6124	27.0457	21.2203	1.3921	1	1		32.2839	22.2926	42.2752	2960.72	2960.72		4.47507	46.9758	210.22	9875.27	0.299811	0.299811	0.0921589	18201.9
							4.67299	1.93198	1.46599	0.711499	1.54203	18.2175	26.7066	13.8235	20.265	5419.76		15.7539	20.4269	25.0999	25.9879	5.56097	1	0		#NUM!	#NUM!	#NUM!	#NUM!			4.95378	41.3967	205.07	8489.23	#VALUE!		0.0399018	6774.7
							4.41066	2.00149	1.50074	0.659321	1.52289	18.072	27.1215	13.5507	20.3361	5092.46		18.7129	23.1235	27.5342	26.9478	3.82428	1	1		10.1317	6.75115	13.5123	286.588	286.588		2.44424	42.8342	104.697	4484.62	0.0639047	0.0639047	0.0709713	6365.58
							4.19973	2.27805	1.63903	0.620417	1.57356	20.2722	33.2268	14.5856	23.9062	6394.16		19.2036	23.4033	27.603	25.8567	2.45338	1	1		19.4029	11.838	26.9677	1002.94	1002.94		1.93942	45.1212	87.5092	3948.52	0.254004	0.254004	0.101211	7992.7
							3.7985	2.59228	1.79614	0.602945	1.43512	14.0326	25.2045	9.72293	17.4637	2924.4		18.6642	22.4627	26.2612	21.1622	1.30049	1	1		16.4083	9.13533	23.6813	679.641	679.641		4.33064	45.2369	195.905	8862.11	0.0766906	0.0766906	0.0206243	3655.51
							5.43511	2.07386	1.53693	0.565399	1.43739	25.8667	39.7552	19.1697	29.4625	13012.7		17.1037	22.5388	27.9739	25.3785	2.83977	1	1		25.1211	16.345	33.8972	1740.6	1740.6		3.69323	46.5746	172.011	8011.35	0.217266	0.217266	0.101518	16265.9
							4.01554	2.11522	1.55761	0.563731	1.66441	26.2542	40.8938	19.3331	30.1135	9973.62		19.0056	23.0211	27.0367	24.0664	1.04527	1	1		29.0753	18.6666	39.484	2315.46	2315.46		4.81187	42.0125	202.159	8493.18	0.272626	0.272626	0.0733944	12467
							5.44033	2.69655	1.84828	0.655928	1.68127	35.0506	64.7832	24.0244	44.4038	26600.5		18.3084	23.7487	29.189	21.6005	2.14823	1	1		40.7954	22.0721	59.5186	4127.11	4127.11		4.17241	44.9228	187.437	8420.18	0.490146	0.490146	0.197446	33250.6
							5.32782	1.85755	1.42878	0.628494	1.69083	37.1114	53.0239	28.545	40.7844	25333.8		16.8255	22.1534	27.4812	24.0596	1.90625	1	1		38.0845	26.6553	49.5137	4146.29	4146.29		3.65036	35.8351	130.811	4687.63			0.337775	31667.2
							4.90279	2.21513	1.60756	0.786083	1.59872	18.6614	29.9994	13.543	21.7712	6257.77		20.4231	25.3259	30.2287	19.4519	5.87403	0	0		#NUM!	#NUM!	#NUM!	#NUM!			4.30379	43.9235	189.038	8303.2	#VALUE!		0.0471036	7822.21
							4.07577	1.77606	1.38803	0.818056	1.7584	16.8405	23.3751	13.1612	18.2681	3939.2		18.8688	22.9446	27.0204	22.6488	0.295801	1	1		18.22	13.1265	23.3134	961.401	961.401		2.2802	46.3622	105.715	4901.18	0.196157	0.196157	0.0502328	4924
							3.83357	1.79089	1.39545	0.744543	1.56194	12.9317	18.0454	10.0762	14.0608	2189.87		18.8737	22.7072	26.5408	25.945	3.23779	1	1		7.52839	5.39497	9.66181	163.756	163.756		2.51558	45.028	113.271	5100.38	0.0321067	0.0321067	0.0268347	2737.34
							5.04699	2.05034	1.52517	0.783095	1.5146	16.8128	25.6424	12.5064	19.0744	5084.8		17.03	22.077	27.124	23.2326	1.15555	1	1		18.5677	12.1742	24.9612	954.677	954.677		2.34423	44.7009	104.789	4684.17	0.203809	0.203809	0.0678454	6356
							3.88799	1.74188	1.37094	0.569001	1.74133	28.401	38.9362	22.3529	30.6446	10630.7		16.4781	20.3661	24.2541	25.5548	5.18873	1	0		#NUM!	#NUM!	#NUM!	#NUM!			4.093	43.9902	180.052	7920.53	#VALUE!		0.0838858	13288.4
							5.51275	1.77544	1.38772	0.774904	1.54243	20.6222	28.6179	16.1187	22.3683	7988.9		17.0323	22.545	28.0578	23.4127	0.867661	1	1		22.0895	15.9178	28.2612	1413.27	1413.27		2.76289	40.3413	111.459	4496.4	0.314311	0.314311	0.111046	9986.12
							4.3583	2.62043	1.81022	0.664208	1.65709	22.5873	40.8879	15.6035	28.2457	8735.42		19.11	23.4683	27.8266	22.8798	0.588538	1	1		27.987	15.4606	40.5134	1967.77	1967.77		2.10354	43.5652	91.6411	3992.37	0.492883	0.492883	0.136752	10919.3
							5.0587	1.60295	1.30148	0.533522	1.58884	35.6543	46.4033	28.9486	37.6759	21348.4		18.0501	23.1088	28.1675	20.3656	2.74325	1	1		31.6551	24.3225	38.9878	2979.11	2979.11		3.09419	42.3546	131.053	5550.71	0.536708	0.536708	0.240379	26685.5
							4.15783	2.03592	1.51796	0.608633	1.36716	13.8327	20.9975	10.3135	15.6555	2828.73		17.1014	21.2592	25.417	23.2688	2.00954	1	1		13.7056	9.02895	18.3822	521.416	521.416		2.20638	43.0989	95.0925	4098.39	0.127225	0.127225	0.0431379	3535.91
							5.69573	2.09719	1.54859	0.684194	1.61137	30.4129	47.0972	22.4573	34.7773	18925.7		19.9991	25.6948	31.3905	22.4789	3.21593	1	1		28.7034	18.5352	38.8717	2263.5	2263.5		2.24078	42.2153	94.5951	3993.36	0.566815	0.566815	0.296206	23657.1
							3.87842	1.99709	1.49854	0.68091	1.54705	14.7537	22.109	11.0707	16.5898	2982.28		19.4358	23.3142	27.1926	23.9313	0.617094	1	1		16.3785	10.9296	21.8274	749.475	749.475		3.75769	43.4723	163.355	7101.43	0.105539	0.105539	0.0262472	3727.85
							4.85242	1.81713	1.40857	0.769312	1.64198	20.5753	28.9817	15.9491	22.4654	7046.43		17.3835	22.2359	27.0884	21.0294	1.2065	1	1		21.7599	15.4483	28.0716	1362.37	1362.37		2.60594	44.8596	116.901	5244.15	0.25979	0.25979	0.0839797	8808.03
							5.29671	1.91562	1.45781	0.644451	1.59541	28.8074	41.9957	21.9227	31.9592	15319.9		18.5741	23.8708	29.1675	21.7737	2.0971	1	1		29.3476	20.1313	38.5639	2438.94	2438.94		4.93448	38.2438	188.714	7217.13	0.337938	0.337938	0.132669	19149.8
							4.37358	2.50819	1.7541	0.675081	1.39203	13.4774	23.6407	9.42538	16.533	3061.58		17.9285	22.302	26.6756	22.6744	0.372412	1	1		16.473	9.39115	23.5548	694.942	694.942		4.73731	47.3333	224.232	10613.7	0.0654762	0.0654762	0.0180286	3826.98
							4.50285	1.90781	1.45391	0.598465	1.72607	32.5694	47.3529	24.8205	36.0867	16626.3		16.3953	20.8981	25.401	25.9756	5.07746	1	0		#NUM!	#NUM!	#NUM!	#NUM!			4.33764	48.9002	212.111	10372.3	#VALUE!		0.100184	20782.8
							5.44969	1.69365	1.34683	0.513533	1.60677	44.4869	59.9161	35.3769	47.6465	36289.8		17.8456	23.2953	28.745	22.6606	0.634717	1	1		47.3222	35.1361	59.5084	6568.73	6568.73		3.56128	40.3182	143.584	5789.05			0.391794	45362.3
							4.97316	1.79047	1.39524	0.569536	1.50884	26.302	36.6975	20.496	28.5968	11751.4		17.687	22.6602	27.6333	22.793	0.132866	1	1		28.5866	20.4887	36.6844	2361.27	2361.27		3.98122	45.8508	182.542	8369.69	0.282122	0.282122	0.0877524	14689.2
							4.82834	1.82291	1.41145	0.770507	1.74824	24.7392	34.9182	19.1553	27.0367	10145.8		17.6041	22.4325	27.2608	19.8512	2.58131	1	1		22.8486	16.188	29.5092	1500.72	1500.72		4.1468	41.3139	171.321	7077.93	0.212029	0.212029	0.0895905	12682.3
							5.25639	2.14784	1.57392	0.632082	1.57539	28.1335	44.2799	20.616	32.448	15074.7		17.8377	23.0941	28.3505	20.5442	2.54996	1	1		28.3741	18.0277	38.7206	2192.96	2192.96		3.26276	41.9968	137.025	5754.63	0.381078	0.381078	0.163723	18843.4
							3.96605	2.66205	1.83102	0.65603	1.56586	16.7346	30.6415	11.5105	21.076	4394.52		17.9709	21.9369	25.903	22.3266	0.389679	1	1		20.974	11.4548	30.4932	1097.34	1097.34		2.33572	43.0148	100.471	4321.73	0.253912	0.253912	0.0635527	5493.15
							5.96402	1.99075	1.49537	0.787439	1.58844	24.9315	37.2819	18.7276	28.0048	13081.9		16.9898	22.9538	28.9178	23.2655	0.31175	1	1		27.9665	18.702	37.2309	2187.47	2187.47		3.0336	46.246	140.292	6487.94	0.337159	0.337159	0.126021	16352.3
							5.13946	2.73839	1.86919	0.591473	1.44654	22.818	42.6513	15.5753	29.1133	10726		17.0129	22.1523	27.2918	23.6297	1.47735	1	1		27.8846	14.918	40.8511	1914.54	1914.54		3.26029	40.7585	132.885	5416.17	0.353485	0.353485	0.123772	13407.5
							4.89432	1.97694	1.48847	0.6038	1.47861	22.0678	32.8472	16.6152	24.7312	8391.65		18.1489	23.0432	27.9375	21.5058	1.53742	1	1		23.4794	15.7742	31.1846	1545.39	1545.39		3.81925	39.5107	150.901	5962.21	0.259197	0.259197	0.0879671	10489.6
							5.77032	1.96755	1.48377	0.643616	1.58302	32.2066	47.7874	24.2878	36.0376	21040.3		16.8245	22.5948	28.3651	18.7193	3.87556	1	1		26.6996	17.9944	35.4048	2001.47	2001.47		3.37453	38.1264	128.659	4905.28	0.408023	0.408023	0.268082	26300.3
							5.29849	2.1358	1.5679	0.61247	1.81968	50.7184	79.5213	37.2326	58.377	49284.4		18.7607	24.0592	29.3577	22.3295	1.72974	1	1		55.1786	35.1927	75.1645	8310.27	8310.27		3.16108	44.9926	142.225	6399.07			0.481363	61605.5
							4.74592	2.26868	1.63434	0.647545	1.60728	24.5682	40.1529	17.6988	28.9258	10595.7		18.9919	23.7378	28.4837	21.2058	2.53201	1	1		24.4652	14.9695	33.961	1597.12	1597.12		2.88935	40.1582	116.031	4659.6	0.342758	0.342758	0.142122	13244.6
							4.55269	2.39646	1.69823	0.527526	1.5408	27.6841	47.0139	19.6181	33.316	13191.7		17.2574	21.8101	26.3628	24.6175	2.80734	1	1		26.228	15.4443	37.0117	1795.8	1795.8		4.23571	44.8622	190.023	8524.85	0.210655	0.210655	0.0967148	16489.6
							4.31622	2.40582	1.70291	0.722619	1.67901	20.1019	34.2317	14.2287	24.2302	6604.62		21.0846	25.4008	29.7171	22.7551	2.6457	1	1		19.1445	11.2422	27.0468	955.25	955.25		3.05719	41.513	126.913	5268.55	0.181312	0.181312	0.0783495	8255.77
							3.95855	2.80781	1.90391	0.610859	1.66502	22.4553	42.7527	15.2264	28.9895	8095.54		19.4821	23.4406	27.3992	22.8223	0.618358	1	1		28.6337	15.0394	42.2279	1995.17	1995.17		4.52951	44.0297	199.433	8780.98	0.227216	0.227216	0.0576213	10119.4
							4.29624	1.9169	1.45845	0.642147	1.32328	12.3683	18.0385	9.41027	13.7244	2291.09		17.8474	22.1437	26.4399	23.0777	0.934029	1	1		13.3961	9.18519	17.6071	508.072	508.072		2.39052	39.3915	94.1663	3709.35	0.136971	0.136971	0.0386032	2863.86
							4.84896	2.12695	1.56348	0.622868	1.47346	20.5695	32.1599	15.1202	23.6401	7407.49		17.4907	22.3397	27.1886	25.3706	3.03089	1	1		18.4529	11.8025	25.1033	930.794	930.794		2.88782	42.2598	122.039	5157.34	0.18048	0.18048	0.0897688	9259.36
							5.64509	2.00223	1.50111	0.698317	1.43806	20.1936	30.3128	15.1396	22.7262	8138.8		17.5237	23.1688	28.8139	24.74	1.57117	1	1		21.8282	14.5413	29.1151	1330.06	1330.06		2.43994	43.0318	104.995	4518.11	0.294385	0.294385	0.112586	10173.5
							4.47728	2.44163	1.72081	0.654266	1.65244	24.0003	41.3	16.9149	29.1075	9826.16		16.9497	21.427	25.9043	24.0148	2.58779	1	1		23.7531	13.8034	33.7028	1461.51	1461.51		2.10166	37.1193	78.0119	2895.74	0.50471	0.50471	0.212082	12282.7
							4.76601	2.22789	1.61395	0.613816	1.42486	18.5479	29.9353	13.4366	21.686	6022.53		16.8731	21.6391	26.4052	19.4386	2.20056	1	1		19.236	11.9186	26.5534	994.253	994.253		2.70961	42.8721	116.167	4980.3	0.199637	0.199637	0.0755794	7528.16
							4.59247	2.44329	1.72165	0.518958	1.60436	33.0515	56.903	23.2895	40.0963	19120.2		15.9403	20.5327	25.1252	24.6098	4.07712	1	1		18.4547	10.7192	26.1902	881.966	881.966		3.21424	44.6056	143.373	6395.25	0.137909	0.137909	0.186859	23900.2
							5.10518	2.12309	1.56154	0.749439	1.70971	26.5862	41.5155	19.5543	30.5349	13020.1		19.6298	24.7349	29.8401	18.8581	5.87688	0	0		#NUM!	#NUM!	#NUM!	#NUM!			4.02824	40.0584	161.365	6464.02	#VALUE!		0.12589	16275.1
							4.97609	2.23381	1.61691	0.678314	1.67096	27.9345	45.1675	20.2199	32.6937	14277.2		16.2355	21.2116	26.1877	21.9693	0.757728	1	1		32.3125	19.9841	44.6408	2802.64	2802.64		3.04192	43.3795	131.957	5724.22	0.48961	0.48961	0.155886	17846.6
							4.66843	1.95519	1.4776	0.63394	1.60932	24.8587	36.7311	18.7864	27.7588	10120.4		15.9401	20.6085	25.277	18.6635	1.94505	1	1		25.2347	17.0782	33.3912	1791.54	1791.54		3.93381	43.548	171.31	7460.2	0.240146	0.240146	0.084787	12650.6
							5.30812	2.07975	1.53988	0.635994	1.41009	19.9244	30.6811	14.7523	22.7167	7547.78		16.5201	21.8282	27.1364	22.4194	0.591214	1	1		22.5753	14.6605	30.4902	1404.29	1404.29		3.11065	40.3834	125.619	5072.91	0.276822	0.276822	0.0929913	9434.72
							5.58716	2.48566	1.74283	0.6366	1.639	35.1648	61.2864	24.6559	42.9712	26523.2		19.8511	25.4382	31.0254	22.4258	3.01243	1	1		36.1902	20.7652	51.6152	3367.15	3367.15		3.73199	46.3263	172.889	8009.32	0.420404	0.420404	0.206972	33154
							5.30012	1.69831	1.34916	0.587107	1.61015	34.5626	46.6304	27.4569	37.0436	21318.5		18.1568	23.4569	28.757	21.1342	2.32276	1	1		33.2969	24.6798	41.914	3249.75	3249.75		2.85167	40.7429	116.185	4733.73	0.68651	0.68651	0.281471	26648.1
							5.09497	2.59758	1.79879	0.761018	1.5249	18.1628	32.6712	12.5775	22.6243	6577.34		19.4915	24.5865	29.6814	24.8537	0.267231	1	1		22.5932	12.5602	32.6262	1287.4	1287.4		3.32542	37.4229	124.447	4657.18	0.276433	0.276433	0.0882689	8221.68
							5.07075	2.60891	1.80446	0.684545	1.55947	22.7103	40.9797	15.7076	28.3436	10254.2		19.1412	24.2119	29.2827	20.8658	3.34615	1	1		21.2963	11.8021	30.7905	1141.63	1141.63		4.00712	36.5468	146.447	5352.18	0.213302	0.213302	0.119743	12817.7
							4.80123	2.39146	1.69573	0.675185	1.51104	19.3776	32.8592	13.7402	23.2997	6810.1		18.6849	23.4861	28.2873	21.394	2.09211	1	1		20.9714	12.3672	29.5756	1149.09	1149.09		3.35359	41.7208	139.914	5837.34	0.196851	0.196851	0.0729153	8512.63
							3.86766	2.21288	1.60644	0.665284	1.66702	18.8079	30.2138	13.6536	21.9337	5012.46		18.8347	22.7024	26.5701	20.636	2.06638	1	1		18.5409	11.5416	25.5401	926.058	926.058		2.97108	45.2954	134.576	6095.69	0.15192	0.15192	0.0513935	6265.58
							5.02309	1.75175	1.37587	0.58864	1.58247	29.749	40.9309	23.3657	32.1483	15092.2		19.4544	24.4775	29.5006	22.5624	1.91505	1	1		29.7203	21.601	37.8395	2567.85	2567.85		3.32632	39.1133	130.104	5088.78	0.504609	0.504609	0.185361	18865.2
							4.70728	2.10926	1.55463	0.693258	1.53522	18.9283	29.4266	13.9511	21.6889	6071.12		15.967	20.6742	25.3815	24.3858	3.71155	1	1		13.3402	8.58095	18.0995	487.924	487.924		4.92191	44.9846	221.41	9960.06	0.048988	0.048988	0.0380967	7588.9
							4.487	2.24311	1.62155	0.673269	1.69837	25.0645	40.6435	18.1193	29.3814	10381		18.3299	22.8169	27.3039	23.8871	1.07012	1	1		28.5336	17.5964	39.4707	2181.97	2181.97		4.10539	40.8519	167.713	6851.39	0.318472	0.318472	0.0946977	12976.2
							4.25717	2.44093	1.72047	0.646568	1.52075	17.5688	30.2266	12.3832	21.3049	5006.02		18.3102	22.5673	26.8245	24.8616	2.29429	1	1		17.9463	10.431	25.4615	834.376	834.376		3.54597	41.6571	147.715	6153.36	0.135597	0.135597	0.0508464	6257.53
							5.27015	2.76419	1.8821	0.619944	1.62094	32.1083	60.4309	21.862	41.1464	21873.7		16.9519	22.222	27.4922	24.8138	2.59175	1	1		35.827	19.0357	52.6184	3146.7	3146.7		3.43606	47.7344	164.018	7829.31	0.401914	0.401914	0.174614	27342.1
							4.44011	3.09508	2.04754	0.718415	1.62988	19.4656	39.8567	12.8774	26.3671	7159.35		17.459	21.8991	26.3392	21.6442	0.2549	1	1		26.3236	12.8562	39.7909	1607.11	1607.11		2.90622	37.8225	109.921	4157.47	0.38656	0.38656	0.107628	8949.19
							4.12229	2.28404	1.64202	0.698274	1.51882	14.8314	24.3534	10.6624	17.5079	3362.83		18.9986	23.1209	27.2432	23.2658	0.144874	1	1		17.4971	10.6559	24.3384	814.76	814.76		3.46403	43.8673	151.957	6665.96	0.122227	0.122227	0.0315299	4203.53
							5.2182	1.93438	1.46719	0.533432	1.64674	42.7565	62.7319	32.43	47.5809	33350.8		19.6858	24.904	30.1222	24.2698	0.634202	1	1		47.2282	32.1895	62.2669	6296.83	6296.83		3.24675	41.4678	134.635	5583.03			0.373349	41688.4
							5.70322	2.14824	1.57412	0.612962	1.39479	22.4448	35.3309	16.4464	25.8887	10411.1		17.6018	23.305	29.0082	26.5722	3.2672	1	1		21.2195	13.4802	28.9588	1226.39	1226.39		3.52455	38.9781	137.38	5354.82	0.229025	0.229025	0.121515	13013.8
							5.13992	2.07159	1.5358	0.758856	1.57249	20.2497	31.0994	15.0123	23.0559	7538.88		19.3102	24.4501	29.59	22.2986	2.15146	1	1		20.9389	13.6339	28.2439	1209.75	1209.75		2.50338	44.2397	110.749	4899.5	0.246912	0.246912	0.096169	9423.6
							5.02111	2.01499	1.50749	0.750865	1.62183	21.797	32.8589	16.3072	24.5831	8452.46		17.4645	22.4856	27.5067	20.4948	1.99076	1	1		22.5683	14.9708	30.1659	1418.76	1418.76		3.149	44.0299	138.65	6104.77	0.232403	0.232403	0.0865353	10565.6
							3.9437	2.38292	1.69146	0.700251	1.60303	15.9702	27.013	11.3361	19.1745	3793.93		18.1684	22.1121	26.0558	25.267	3.1549	1	1		11.5051	6.80185	16.2083	346.349	346.349		3.17372	39.9318	126.732	5060.65	0.0684397	0.0684397	0.0468557	4742.41
							5.11362	2.98827	1.99413	0.727557	1.53939	20.1211	40.1243	13.4273	26.7758	8655.11		20.212	25.3257	30.4393	17.4482	7.87746	0	0		#NUM!	#NUM!	#NUM!	#NUM!			3.32783	38.8199	129.186	5014.99	#VALUE!		0.107865	10818.9
							5.75096	2.55862	1.77931	0.651118	1.55686	29.7108	52.8647	20.6614	36.7631	19734.1		18.407	24.1579	29.9089	19.8303	4.32758	1	1		24.212	13.6075	34.8165	1488.38	1488.38		2.3152	42.2851	97.8985	4139.65	0.359544	0.359544	0.297943	24667.6
							4.03862	1.97779	1.4889	0.578256	1.56502	20.9439	31.1833	15.7667	23.475	6237.99		16.9042	20.9428	24.9814	17.2704	3.67247	1	1		9.76698	6.55987	12.9741	267.376	267.376		3.33208	44.9082	149.638	6719.96	0.0397883	0.0397883	0.0580174	7797.49
							4.91592	2.32863	1.66432	0.728771	1.68458	24.9197	41.4743	17.8106	29.6424	11408		20.3422	25.2581	30.1741	23.5949	1.66323	1	1		27.8943	16.7602	39.0284	2054.99	2054.99		3.12833	42.3539	132.497	5611.75	0.366194	0.366194	0.127055	14260.1
							5.0402	1.67845	1.33923	0.572669	1.75169	45.1386	60.4507	36.0158	48.2333	34474		18.2011	23.2413	28.2815	21.8304	1.41085	1	1		46.3051	34.576	58.0341	6303.88	6303.88		2.4943	44.3955	110.736	4916.17			0.438273	43092.5
							5.21597	2.34936	1.67468	0.651544	1.65769	31.4443	52.6593	22.4143	37.5368	19341.2		19.2386	24.4545	29.6705	22.4655	1.98901	1	1		34.7005	20.7206	48.6803	3168.88	3168.88		3.12162	44.1263	137.745	6078.2	0.521352	0.521352	0.198879	24176.6
							4.92171	1.64427	1.32213	0.591647	1.36119	17.8801	23.6398	14.3771	19.0085	5255.12		16.3924	21.3141	26.2358	18.8062	2.50792	1	1		16.3555	12.3706	20.3405	790.499	790.499		5.24408	42.8876	224.906	9645.67	0.0819537	0.0819537	0.034051	6568.9
							5.07938	2.01141	1.5057	0.743094	1.40091	14.7719	22.242	11.0579	16.65	3924.73		19.7247	24.8041	29.8835	22.5858	2.2183	1	1		14.9782	9.94767	20.0088	625.306	625.306		2.55076	40.3025	102.802	4143.16	0.150925	0.150925	0.0592049	4905.91
							4.32421	1.98502	1.49251	0.609973	1.51532	19.4503	29.0298	14.6244	21.8271	5767.39		21.1089	25.4331	29.7573	21.7741	3.65899	1	1		11.6322	7.7937	15.4707	378.793	378.793		3.16632	43.1939	136.766	5907.44	0.0641213	0.0641213	0.0610183	7209.24
							5.0248	2.35955	1.67978	0.722512	1.60076	22.2985	37.4565	15.8744	26.6655	9386.3		18.0497	23.0745	28.0993	18.856	4.21847	1	1		14.4877	8.62476	20.3506	551.409	551.409		2.63312	42.9468	113.084	4856.59	0.113538	0.113538	0.120793	11732.9
							4.53455	2.27181	1.6359	0.585559	1.72018	33.8204	55.327	24.3537	39.8404	19194.9		18.8844	23.419	27.9535	24.1632	0.744176	1	1		39.3002	24.0235	54.5769	4119.03	4119.03		2.37718	45.7771	108.82	4981.48	0.82687	0.82687	0.240829	23993.7
							3.73792	2.11016	1.55508	0.688136	1.7333	18.7888	29.2181	13.8464	21.5323	4750.82		19.7909	23.5288	27.2667	22.687	0.841801	1	1		20.9791	13.4907	28.4675	1206.52	1206.52		3.94298	44.0114	173.536	7637.56	0.157972	0.157972	0.0388771	5938.53
							4.39082	1.9867	1.49335	0.708603	1.69213	21.8983	32.7019	16.4604	24.5812	7425.21		17.1913	21.5821	25.9729	23.7047	2.12262	1	1		21.518	14.4092	28.6268	1295.88	1295.88		2.5922	46.467	120.452	5597.05	0.231528	0.231528	0.0829143	9281.51
							5.34406	1.85393	1.42696	0.537913	1.49824	31.1879	44.5039	24.0052	34.2546	17936		16.2555	21.5996	26.9436	21.7364	0.136787	1	1		34.2434	23.9974	44.4894	3354.05	3354.05		2.4313	44.459	108.093	4805.72	0.697929	0.697929	0.233264	22420
							4.45402	1.75005	1.37503	0.612633	1.5779	22.8794	31.4597	17.9765	24.7181	7913.37		17.1128	21.5668	26.0208	21.3266	0.240199	1	1		24.6821	17.9503	31.4139	1771.51	1771.51		3.42281	40.9177	140.054	5730.67	0.309128	0.309128	0.086305	9891.71
							4.26542	2.09946	1.54973	0.763922	1.68696	18.1976	28.2014	13.4327	20.817	5076.26		21.3634	25.6288	29.8942	19.1731	6.45575	0	0		#NUM!	#NUM!	#NUM!	#NUM!			2.04727	45.6148	93.3857	4259.77	#VALUE!		0.0744797	6345.33
							3.83985	2.13879	1.56939	0.631924	1.64967	19.6231	30.7964	14.399	22.5977	5349.3		19.3396	23.1795	27.0193	21.4062	1.77328	1	1		20.0437	12.7716	27.3158	1096	1096		2.86333	40.7584	116.705	4756.69	0.230411	0.230411	0.0702864	6686.62
							4.06345	1.53526	1.26763	0.607948	1.6307	22.1501	28.0781	18.2889	23.1835	6555.42		20.1416	24.2051	28.2685	24.1478	0.0572744	1	1		23.1812	18.2871	28.0753	1612.94	1612.94		2.40352	44.3149	106.512	4720.06	0.341721	0.341721	0.0868027	8194.27
							4.18822	1.7021	1.35105	0.67818	1.68046	21.3162	28.7992	16.9198	22.8595	6411.45		18.2939	22.4821	26.6703	24.9227	2.44063	1	1		18.577	13.7501	23.404	1010.99	1010.99		2.4764	46.4528	115.035	5343.71	0.189192	0.189192	0.0749883	8014.32
							4.45262	2.70354	1.85177	0.694325	1.74215	25.4686	47.162	17.4446	32.3033	11508.5		18.7007	23.1533	27.6059	21.5927	1.56056	1	1		30.2543	16.338	44.1705	2267.16	2267.16		2.62558	42.1392	110.64	4662.28	0.486277	0.486277	0.154276	14385.6
							4.89382	2.23552	1.61776	0.638976	1.67817	30.4631	49.282	22.045	35.6635	16703.1		18.8919	23.7857	28.6796	20.4146	3.37116	1	1		25.8522	15.9803	35.7242	1793.48	1793.48		2.65695	43.9197	116.692	5125.09	0.349941	0.349941	0.203692	20878.8
							4.94788	2.45887	1.72944	0.638911	1.66594	30.2684	52.3473	21.2891	36.8182	17323		18.7585	23.7064	28.6543	25.8689	2.16244	1	1		33.1158	19.1483	47.0833	2832.35	2832.35		3.30852	41.4882	137.265	5694.85	0.497353	0.497353	0.190116	21653.7
							4.8311	2.03706	1.51853	0.697909	1.46448	17.003	25.8196	12.6749	19.2473	4966.96		15.9176	20.7487	25.5798	20.5458	0.202893	1	1		19.2303	12.6638	25.7968	1026.31	1026.31		3.67579	47.3899	174.195	8255.1	0.124324	0.124324	0.0376052	6208.7
							4.69733	2.26444	1.63222	0.622542	1.55564	23.193	37.8561	16.7176	27.2869	9339.24		19.543	24.2403	28.9377	22.5624	1.67789	1	1		25.4867	15.6147	35.3586	1734.52	1734.52		2.81957	44.0283	124.141	5465.7	0.317346	0.317346	0.106794	11674.1
							5.13752	2.3642	1.6821	0.66294	1.68121	31.2653	52.5914	22.2449	37.4181	18882		19.4046	24.5422	29.6797	17.937	6.60515	0	0		#NUM!	#NUM!	#NUM!	#NUM!			4.46272	44.9767	200.718	9027.64	#VALUE!		0.130724	23602.6
							4.39124	2.1152	1.5576	0.695527	1.44121	14.235	22.1725	10.4825	16.3275	3206.38		15.7002	20.0914	24.4827	21.3296	1.2382	1	1		15.6649	10.0571	21.2728	672.121	672.121		2.81065	43.2319	121.51	5253.08	0.127948	0.127948	0.0381487	4007.97
							6.14616	1.9189	1.45945	0.813969	1.60583	25.6985	37.5058	19.5454	28.5256	14154.6		16.0677	22.2138	28.36	23.526	1.31216	1	1		27.8679	19.0948	36.6411	2198.03	2198.03		4.28266	36.8349	157.751	5810.75	0.378269	0.378269	0.152246	17693.2
							4.85609	1.73106	1.36553	0.6374	1.7082	32.0935	43.8247	25.3167	34.5707	16926.3		19.0534	23.9095	28.7656	23.5	0.40954	1	1		34.4475	25.2265	43.6686	3460.79	3460.79		3.05566	42.7056	130.494	5572.83	0.621012	0.621012	0.189831	21157.9
							4.86707	2.1694	1.5847	0.715315	1.60061	21.525	34.1107	15.7236	24.9172	8200.88		18.5093	23.3764	28.2434	21.4907	1.88571	1	1		22.971	14.4955	31.4465	1432.04	1432.04		2.15377	42.9291	92.4596	3969.21	0.360787	0.360787	0.129133	10251.1
							4.56335	2.01507	1.50754	0.612475	1.58562	24.1531	36.4117	18.0696	27.2406	9432.42		17.5374	22.1007	26.6641	24.5141	2.41333	1	1		23.1195	15.336	30.9031	1488.89	1488.89		3.07013	41.0621	126.066	5176.53	0.287624	0.287624	0.113884	11790.5
							3.85197	1.62128	1.31064	0.755075	1.56611	12.8328	16.8192	10.374	13.5966	2111.46		21.0737	24.9256	28.7776	22.5921	2.33356	1	1		10.8176	8.25365	13.3815	346.977	346.977		3.62965	44.7148	162.299	7257.17	0.0478115	0.0478115	0.0181843	2639.33
							5.09936	1.92769	1.46384	0.622117	1.58087	27.8199	40.724	21.1258	30.9249	13782.6		19.6853	24.7847	29.884	18.9876	5.79707	0	0		#NUM!	#NUM!	#NUM!	#NUM!			2.38939	44.1351	105.456	4654.31	#VALUE!		0.185078	17228.2
							3.81861	2.38052	1.69026	0.573825	1.68853	24.5397	41.4785	17.4241	29.4513	8670.22		17.6977	21.5163	25.3349	21.0988	0.417463	1	1		29.2748	17.3197	41.2299	2243.38	2243.38		4.38255	44.8792	196.685	8827.06	0.254148	0.254148	0.0613895	10837.8
							4.73996	2.14427	1.57213	0.583163	1.60839	29.0808	45.719	21.3215	33.5202	14515.7		16.8628	21.6027	26.3427	25.0682	3.46546	1	1		22.8693	14.5467	31.1919	1425.46	1425.46		3.64178	43.9485	160.05	7033.98	0.202654	0.202654	0.128978	18144.6
							3.7997	2.19714	1.59857	0.593569	1.51237	16.5726	26.4925	12.0577	19.2751	3813.17		18.3481	22.1478	25.9475	23.3673	1.21957	1	1		18.2553	11.4197	25.0908	900.161	900.161		3.31893	38.4563	127.634	4908.33	0.183395	0.183395	0.0485549	4766.46
							5.29784	2.41881	1.70941	0.767099	1.54909	19.956	34.1129	14.1032	24.108	8007.26		17.7368	23.0347	28.3325	22.3706	0.664059	1	1		23.9179	13.9919	33.8438	1487.67	1487.67		2.17464	46.1364	100.33	4628.86	0.321391	0.321391	0.108116	10009.1
							4.71467	2.65426	1.82713	0.555122	1.68215	36.5449	66.7722	25.1566	45.9644	24879.9		20.077	24.7917	29.5063	24.5096	0.282026	1	1		45.8821	25.1116	66.6526	5258.25	5258.25		1.93181	43.222	83.4968	3608.9			0.430878	31099.9
							4.77962	2.41675	1.70838	0.562788	1.35467	18.1366	30.9842	12.8206	21.9024	5964.74		15.1658	19.9454	24.725	22.1208	2.17538	1	1		19.5024	11.4157	27.589	989.44	989.44		4.06137	46.4456	188.633	8761.16	0.112935	0.112935	0.042551	7455.92
							3.70853	1.65919	1.32959	0.625393	1.67686	19.7832	26.3036	15.8533	21.0784	4858.32		18.2021	21.9106	25.6192	22.5878	0.677201	1	1		20.724	15.5867	25.8613	1266.36	1266.36		3.7081	45.5481	168.897	7692.92	0.164613	0.164613	0.0394707	6072.9
							4.02739	2.10635	1.55318	0.642942	1.64822	20.5773	31.9602	15.1732	23.5667	6135.66		20.0137	24.0411	28.0684	19.2681	4.77297	0	0		#NUM!	#NUM!	#NUM!	#NUM!			3.43945	41.6753	143.34	5973.73	#VALUE!		0.0641942	7669.57
							4.4943	1.72332	1.36166	0.745603	1.70754	21.4853	29.2556	16.9763	23.116	7012.37		18.2412	22.7355	27.2298	20.9431	1.79233	1	1		21.1982	15.5679	26.8285	1312.13	1312.13		1.98916	40.2529	80.0694	3223.02	0.407112	0.407112	0.135982	8765.47
							4.68121	2.7575	1.87875	0.632828	1.57052	23.1682	43.5272	15.785	29.6561	10104.5		16.5773	21.2585	25.9398	22.0261	0.767608	1	1		29.2547	15.5714	42.938	2100.48	2100.48		2.18797	37.3817	81.7901	3057.45	0.687003	0.687003	0.206554	12630.6
							4.7896	2.31402	1.65701	0.557873	1.57417	29.5052	48.8905	21.1279	35.0092	15542.8		18.9937	23.7833	28.5729	25.9577	2.1744	1	1		31.1935	18.8252	43.5619	2576.3	2576.3		4.84769	43.4694	210.726	9160.13	0.281251	0.281251	0.106049	19428.5
							3.90119	2.03697	1.51849	0.544074	1.53654	20.6333	31.3313	15.3813	23.3563	5906.35		17.6004	21.5016	25.4028	20.6094	0.892244	1	1		22.7372	14.9736	30.5009	1434.79	1434.79		2.3939	38.7427	92.7463	3593.24	0.399303	0.399303	0.102734	7382.94
							5.67342	1.91303	1.45651	0.710332	1.50369	22.746	33.1298	17.318	25.2239	10226.1		19.3906	25.064	30.7374	22.0697	2.99429	1	1		21.4248	14.7096	28.1399	1300.39	1300.39		4.84115	40.2932	195.066	7859.81	0.165448	0.165448	0.0813165	12782.6
							5.39309	2.27966	1.63983	0.550375	1.83843	66.4073	108.897	47.7688	78.3328	88134.7		16.8461	22.2392	27.6323	21.3886	0.850576	1	1		77.3524	47.171	107.534	15935.6	15935.6		3.19951	42.8938	137.239	5886.72			0.935737	110168
							4.36038	1.75104	1.37552	0.729912	1.71803	21.5589	29.6546	16.9354	23.295	6879.6		18.3796	22.74	27.1004	25.4221	2.6821	1	1		18.3668	13.3526	23.381	980.798	980.798		2.85936	42.0265	120.169	5050.28	0.194207	0.194207	0.0851389	8599.5
							5.4665	2.53543	1.76771	0.663111	1.56106	26.923	47.5922	18.7709	33.1815	15341.9		20.2136	25.6801	31.1466	24.1893	1.4908	1	1		31.9238	18.0593	45.7882	2597.79	2597.79		2.69413	39.1262	105.411	4124.33	0.629871	0.629871	0.232491	19177.3
							5.94281	1.8826	1.4413	0.647391	1.81349	55.7288	80.3219	42.6654	61.4937	63981.1		19.7228	25.6656	31.6084	23.5215	2.14414	1	1		57.3517	39.7916	74.9118	9364.66	9364.66		3.97828	43.8175	174.318	7638.19			0.52353	79976.4
							4.16846	2.49953	1.74976	0.715686	1.49834	14.0156	24.5239	9.81143	17.1677	3150.99		18.3501	22.5186	26.687	24.0864	1.56781	1	1		15.9071	9.09102	22.7232	648.981	648.981		4.88744	46.7313	228.397	10673.3	0.0608043	0.0608043	0.0184514	3938.74
							5.72661	2.0336	1.5168	0.726379	1.53588	23.8385	36.1583	17.7804	26.9694	11566.4		17.3718	23.0984	28.825	23.1264	0.027982	1	1		26.9691	17.7802	36.1579	2019.71	2019.71		2.06679	43.2995	89.491	3874.92	0.521228	0.521228	0.186559	14458
							3.57784	2.50698	1.75349	0.540479	1.57611	19.6671	34.4861	13.756	24.1211	5332.23		19.3685	22.9464	26.5242	19.4486	3.49782	1	1		5.07308	2.89313	7.25303	65.923	65.923		3.27592	42.9375	140.66	6039.59	0.0109152	0.0109152	0.05518	6665.29
							5.11781	1.7697	1.38485	0.605325	1.48755	23.9386	33.1514	18.7328	25.9421	9984.76		20.0457	25.1635	30.2813	24.9399	0.223583	1	1		25.9173	18.7149	33.1197	1947.26	1947.26		2.1935	46.3425	101.652	4710.83	0.413359	0.413359	0.132471	12481
							5.20396	1.77197	1.38598	0.720275	1.68873	28.2059	39.093	22.0619	30.5774	14100.2		17.9943	23.1982	28.4022	20.028	3.17022	1	1		24.2486	17.4955	31.0016	1703.97	1703.97		3.93938	43.91	172.978	7595.48	0.22434	0.22434	0.116024	17625.2
							4.46171	2.89113	1.94556	0.706061	1.45442	14.6047	28.4145	9.82815	19.1213	3914.38		16.6315	21.0932	25.5549	20.9457	0.147533	1	1		19.1108	9.82278	28.3989	876.367	876.367		2.69034	41.8597	112.617	4714.11	0.185903	0.185903	0.0518971	4892.97
							6.01524	2.06229	1.53115	0.745222	1.65984	32.0199	49.0271	23.7731	36.4001	22025.5		16.5656	22.5808	28.596	24.6464	2.06564	1	1		34.1866	22.3274	46.0457	3229.81	3229.81		2.47243	42.5782	105.271	4482.26	0.720577	0.720577	0.30712	27531.8
							4.55878	1.8451	1.42255	0.708489	1.55151	17.9646	25.5556	13.8505	19.7031	5069.33		16.4083	20.9671	25.5258	22.9083	1.9412	1	1		17.8275	12.5321	23.1229	910.367	910.367		4.34709	43.6918	189.933	8298.5	0.109703	0.109703	0.0381796	6336.66
							5.51379	2.29374	1.64687	0.608107	1.63607	36.854	60.6938	26.4606	43.5772	27819.2		19.6275	25.1413	30.6551	21.682	3.45935	1	1		33.9335	20.6048	47.2621	3059.37	3059.37		3.79674	43.3698	164.664	7141.44	0.428397	0.428397	0.243466	34774
							4.48147	1.8493	1.42465	0.53363	1.6688	34.8556	49.657	26.8519	38.2544	18772.6		18.5542	23.0356	27.5171	19.597	3.43862	1	1		24.5322	17.2198	31.8446	1722.72	1722.72		2.88792	38.7374	111.871	4333.58	0.397528	0.397528	0.270744	23465.8
							5.25709	2.45287	1.72644	0.529332	1.74729	55.218	95.3303	38.8648	67.0975	61190.2		19.953	25.2101	30.4672	21.6728	3.53724	1	1		49.6373	28.7513	70.5233	6370	6370		3.86631	41.1094	158.942	6533.99			0.585307	76487.8
							4.54515	2.82449	1.91225	0.601819	1.41076	17.3285	33.1363	11.7318	22.4341	5550.93		16.9293	21.4744	26.0195	23.1966	1.72225	1	1		20.7611	10.8569	30.6653	1045.93	1045.93		2.94335	46.2443	136.113	6294.45	0.166168	0.166168	0.0551173	6938.66
							5.83149	2.45573	1.72787	0.715301	1.46131	21.4626	37.0845	15.1012	26.0928	10259.7		18.0373	23.8687	29.7002	19.4331	4.43567	1	1		16.9387	9.80328	24.0742	741.435	741.435		3.32453	41.2307	137.073	5651.61	0.13119	0.13119	0.113459	12824.6
							5.1202	2.52077	1.76039	0.605293	1.53632	26.5863	46.8021	18.5666	32.6843	13977.6		19.9926	25.1128	30.233	23.6204	1.49239	1	1		31.2652	17.7604	44.7699	2497.98	2497.98		3.83032	46.4001	177.727	8246.57	0.302911	0.302911	0.105935	17472
							4.41013	2.61156	1.80578	0.616987	1.49774	19.0255	34.3559	13.1553	23.7556	6261.86		16.0238	20.4339	24.844	18.1865	2.24736	1	1		20.4397	11.319	29.5604	1051.16	1051.16		2.26173	43.7526	98.9566	4329.61	0.242785	0.242785	0.0903929	7827.32
							3.99175	1.8908	1.4454	0.657631	1.63292	19.0053	27.4703	14.5283	20.9993	5004.86		17.1048	21.0965	25.0883	25.04	3.94342	1	1		3.25785	2.25394	4.26175	30.1773	30.1773		3.10221	45.4952	141.136	6420.99	0.00469979	0.00469979	0.0487158	6256.08
							3.83132	1.96683	1.48342	0.781181	1.50998	11.0353	16.37	8.32302	12.3465	1639.94		20.2854	24.1167	27.9481	24.6578	0.541069	1	1		12.2228	8.23961	16.2059	419.499	419.499		3.73606	41.1141	153.605	6315.32	0.0664256	0.0664256	0.0162298	2049.93
							5.14831	2.09292	1.54646	0.674694	1.48279	20.3538	31.4763	15.0394	23.2579	7656.51		16.9927	22.1411	27.2894	23.6369	1.49584	1	1		22.2545	14.3906	30.1184	1361.64	1361.64		3.4681	43.1406	149.616	6454.5	0.21096	0.21096	0.0741393	9570.64
							4.71827	1.664	1.332	0.670553	1.63952	24.5046	32.6401	19.6154	26.1278	9490.35		17.743	22.4613	27.1796	22.6686	0.20732	1	1		26.1025	19.5965	32.6086	2007.52	2007.52		2.96209	46.8167	138.675	6492.33	0.309214	0.309214	0.0913612	11862.9
							3.9624	1.88825	1.44412	0.754393	1.69317	16.5841	23.9494	12.6834	18.3164	3781.29		18.4884	22.4508	26.4132	24.6141	2.1633	1	1		15.3457	10.6263	20.0652	669.848	669.848		3.75726	40.462	152.026	6151.28	0.108896	0.108896	0.0384197	4726.61
							4.22593	2.33543	1.66772	0.663552	1.84897	30.6664	51.1428	21.8986	36.5207	14868.7		16.5995	20.8254	25.0513	20.5383	0.287107	1	1		36.4363	21.848	51.0246	3502.21	3502.21		3.38435	46.497	157.362	7316.89	0.478647	0.478647	0.127007	18585.9
							3.75041	1.93513	1.46756	0.531875	1.60138	22.8244	33.4962	17.3096	25.4029	6831.41		16.963	20.7134	24.4638	19.506	1.20744	1	1		24.0504	16.3879	31.7128	1632.71	1632.71		2.50373	40.2751	100.838	4061.27	0.402019	0.402019	0.10513	8539.26
							4.29416	1.81031	1.40516	0.591386	1.62184	24.9127	35.0062	19.3371	27.1716	9131.96		19.0837	23.3779	27.6721	21.066	2.31188	1	1		22.8977	16.2955	29.4999	1510.21	1510.21		2.98432	41.7814	124.689	5209.69	0.289884	0.289884	0.109555	11415
							5.114	2.33805	1.66903	0.611681	1.47864	23.1022	38.5582	16.4916	27.5249	10216.2		15.9688	21.0828	26.1968	21.5543	0.471529	1	1		27.4077	16.4214	38.394	1980.72	1980.72		3.00149	42.6435	127.994	5458.12	0.362893	0.362893	0.116984	12770.3
							4.80388	2.63727	1.81863	0.559369	1.61595	32.2944	58.7317	22.2699	40.5008	19739.3		21.0044	25.8083	30.6122	25.3619	0.446414	1	1		40.3255	22.1735	58.4775	4073.55	4073.55		2.76965	44.012	121.898	5364.98	0.759286	0.759286	0.229956	24674.1
							4.03618	2.54655	1.77327	0.616709	1.61621	20.8282	36.9342	14.5036	25.7189	6792.43		16.4936	20.5298	24.5659	23.6468	3.11704	1	1		16.3389	9.21398	23.4638	679.198	679.198		3.12093	37.9744	118.515	4500.55	0.150914	0.150914	0.0943277	8490.54
							4.23566	1.67923	1.33962	0.611839	1.60494	22.3154	29.8941	17.8022	23.8481	7081.58		18.6385	22.8741	27.1098	20.9755	1.89865	1	1		21.318	15.9135	26.7225	1335.96	1335.96		3.59542	43.9541	158.033	6946.21	0.192329	0.192329	0.063718	8851.97
							4.7386	1.87069	1.43534	0.58408	1.60988	29.0847	41.7466	22.3162	32.0314	13868.8		19.239	23.9776	28.7162	21.5221	2.45545	1	1		27.3955	19.0863	35.7046	2140.9	2140.9		3.77768	36.3192	137.202	4983.08	0.429634	0.429634	0.173949	17336
							4.42493	2.64214	1.82107	0.589048	1.76741	35.3033	64.2898	24.3325	44.3111	21746.2		19.7206	24.1456	28.5705	18.6049	5.5407	0	0		#NUM!	#NUM!	#NUM!	#NUM!			3.78895	44.2791	167.771	7428.75	#VALUE!		0.182957	27182.8
							5.25383	2.32278	1.66139	0.708278	1.70083	30.2124	50.1946	21.6097	35.9022	17903.3		17.1275	22.3813	27.6352	24.9137	2.53237	1	1		31.4563	18.9338	43.9789	2615.96	2615.96		2.64966	45.1548	119.645	5402.56	0.484208	0.484208	0.207116	22379.1
							5.43163	2.00542	1.50271	0.547922	1.628	41.8627	62.9076	31.3687	47.1382	33672.9		18.9457	24.3774	29.809	26.5829	2.20556	1	1		43.0771	28.6662	57.4879	5177.23	5177.23		3.5931	45.7524	164.393	7521.38	0.688335	0.688335	0.27981	42091.1
							4.65431	2.15206	1.57603	0.563053	1.44745	21.2694	33.5213	15.5763	24.5488	7634.67		17.0358	21.6902	26.3445	20.6806	1.00958	1	1		23.9643	15.2055	32.7231	1563.16	1563.16		4.48645	42.0752	188.768	7942.47	0.196811	0.196811	0.0600779	9543.34
							3.8583	1.93245	1.46622	0.645234	1.59813	17.4274	25.5525	13.2228	19.3877	4095.47		20.9731	24.8314	28.6897	25.368	0.536534	1	1		19.1993	13.0944	25.3042	1040.94	1040.94		2.05974	48.5564	100.014	4856.3	0.214349	0.214349	0.0527082	5119.34
							5.33173	2.06585	1.53292	0.664118	1.67711	32.8967	50.4282	24.4104	37.4193	20618.9		19.4926	24.8243	30.156	23.4995	1.32483	1	1		36.2457	23.6448	48.8466	3628.44	3628.44		3.56988	40.9808	146.296	5995.34	0.60521	0.60521	0.214947	25773.7
							4.82476	1.60484	1.30242	0.689423	1.52783	19.5434	25.4536	15.8606	20.6571	6119.21		18.9701	23.7949	28.6197	24.5527	0.757769	1	1		20.4008	15.6638	25.1378	1237.01	1237.01		3.83578	43.4605	166.705	7245.09	0.170737	0.170737	0.0527876	7649.01
							3.92241	1.56379	1.2819	0.60088	1.66683	22.8072	29.2365	18.6959	23.9662	6735.57		18.1328	22.0552	25.9776	23.5757	1.52053	1	1		22.0922	17.234	26.9504	1459.15	1459.15		2.36566	45.2961	107.155	4853.72	0.300625	0.300625	0.086732	8419.46
							4.76143	2.32818	1.66409	0.611313	1.6978	32.6247	54.2904	23.3188	38.8046	18937.2		18.7809	23.5423	28.3037	17.1267	6.41563	0	0		#NUM!	#NUM!	#NUM!	#NUM!			4.7222	44.4404	209.857	9326.12	#VALUE!		0.12691	23671.5
							4.80171	2.1483	1.57415	0.590413	1.72171	36.912	58.1049	27.047	42.576	23707.1		16.7529	21.5546	26.3563	16.8934	4.66121	1	1		10.2241	6.49498	13.9531	284.708	284.708		3.86011	39.6651	153.112	6073.2	0.0468794	0.0468794	0.243972	29633.8
							4.05193	2.43779	1.71889	0.711473	1.55423	14.9359	25.6731	10.5313	18.1022	3441.71		20.5366	24.5885	28.6405	25.0365	0.448015	1	1		17.9912	10.4668	25.5157	839.015	839.015		1.90615	42.5019	81.0149	3443.29	0.243667	0.243667	0.0624713	4302.13
							5.51233	2.59529	1.79764	0.79893	1.50639	18.3483	32.9837	12.7091	22.8464	7259.34		19.2403	24.7526	30.2649	22.5598	2.19281	1	1		20.9609	11.6602	30.2616	1108.53	1108.53		5.00803	44.121	220.959	9748.93	0.113708	0.113708	0.0465393	9074.17
							4.84021	2.82918	1.91459	0.747999	1.42302	14.2566	27.2955	9.64785	18.4717	4004.38		18.2983	23.1385	27.9787	19.6097	3.52886	1	1		12.6427	6.60335	18.682	387.559	387.559		3.46919	40.2161	139.518	5610.86	0.0690731	0.0690731	0.0446053	5005.48
							4.86941	2.02338	1.51169	0.574877	1.67458	35.7967	54.1135	26.7442	40.4289	22139.2		20.01	24.8794	29.7488	19.3939	5.48545	0	0		#NUM!	#NUM!	#NUM!	#NUM!			3.00812	43.6129	131.193	5721.7	#VALUE!		0.241833	27673.9
							5.64448	2.45084	1.72542	0.41209	1.43262	42.4972	73.3254	29.9185	51.622	38901.7		16.9766	22.6211	28.2656	18.0034	4.61767	1	1		29.6876	17.206	42.1692	2279.43	2279.43		2.27177	41.1512	93.4861	3847.07	0.592511	0.592511	0.632002	48627.1
							4.95355	2.9035	1.95175	0.672138	1.62664	25.7658	50.2885	17.3199	33.8042	13554.4		20.8188	25.7723	30.7258	22.8077	2.96456	1	1		27.082	13.8757	40.2883	1756.24	1756.24		2.85421	45.5283	129.947	5916.26	0.29685	0.29685	0.14319	16943
							4.09936	2.3199	1.65995	0.649877	1.71641	23.6012	39.1767	16.8873	28.032	8520.26		19.204	23.3033	27.4027	21.305	1.99837	1	1		24.4756	14.7448	34.2065	1584.52	1584.52		2.85409	41.3599	118.045	4882.33	0.324542	0.324542	0.10907	10650.3
							4.90352	1.57234	1.28617	0.55684	1.62717	34.4602	44.3216	28.1884	36.255	19246.2		20.976	25.8795	30.783	18.6022	7.27724	0	0		#NUM!	#NUM!	#NUM!	#NUM!			4.15263	41.4834	172.265	7146.13	#VALUE!		0.168327	24057.7
							5.58995	1.91786	1.45893	0.670242	1.6341	32.0106	46.7013	24.3507	35.526	19970.9		19.366	24.9559	30.5459	22.5855	2.37047	1	1		32.1735	22.0528	42.2943	2930.18	2930.18		5.00845	48.0409	240.611	11559.2	0.253495	0.253495	0.107982	24963.6
							5.17272	1.82804	1.41402	0.637517	1.54008	25.1353	35.5417	19.4426	27.4921	11229.5		18.4868	23.6596	28.8323	26.3727	2.71316	1	1		23.4069	16.5534	30.2603	1573.66	1573.66		2.35237	38.8013	91.2748	3541.58	0.44434	0.44434	0.198173	14036.9
							4.99203	2.40688	1.70344	0.803861	1.5512	16.9924	28.9455	12.0262	20.4859	5459.3		18.9781	23.9702	28.9622	21.5775	2.39261	1	1		17.9796	10.5549	25.4043	842.385	842.385		2.56416	47.0122	120.547	5667.16	0.148643	0.148643	0.0602076	6824.12
							5.30873	1.95578	1.47789	0.576601	1.60087	34.9478	51.649	26.4084	39.0287	22748		16.4322	21.7409	27.0496	21.858	0.117121	1	1		39.0192	26.4019	51.6365	4282.94	4282.94		2.63217	45.0301	118.527	5337.29	0.802457	0.802457	0.266381	28435.1
							4.79217	2.11884	1.55942	0.60611	1.71232	34.4846	53.776	25.3799	39.5779	20547.6		19.8319	24.6241	29.4163	23.6386	0.98549	1	1		38.732	24.8375	52.6266	4106.41	4106.41		3.99803	45.4383	181.664	8254.49	0.497476	0.497476	0.155579	25684.5
							4.18399	2.36517	1.68258	0.707517	1.61033	17.4962	29.4388	12.4468	20.9428	4816.37		18.1651	22.3491	26.5331	17.7071	4.64195	0	0		#NUM!	#NUM!	#NUM!	#NUM!			3.12393	46.9978	146.818	6900.11	#VALUE!		0.0436259	6020.46
							4.96803	1.92154	1.46077	0.57495	1.7379	42.4264	61.9752	32.2529	47.1141	31197.6		17.9356	22.9037	27.8717	26.4262	3.52251	1	1		33.2235	22.7438	43.7032	3122.67	3122.67		4.03916	44.3021	178.943	7927.57	0.3939	0.3939	0.245958	38997
							5.65	2.32038	1.66019	0.497549	1.71084	63.8711	106.038	45.6986	75.8685	86013		18.0056	23.6556	29.3056	22.4567	1.1989	1	1		74.1407	44.6579	103.624	14538.1	14538.1		3.43285	46.5808	159.905	7448.49			0.721731	107516
							4.66768	2.11147	1.55573	0.662481	1.71712	28.5757	44.4561	21.0546	32.7554	13725.5		17.8441	22.5118	27.1795	25.382	2.87025	1	1		25.8306	16.6035	35.0576	1828.65	1828.65		2.63557	42.2084	111.243	4695.39	0.389457	0.389457	0.1827	17156.9
							4.46983	2.16608	1.58304	0.693464	1.50279	16.4497	26.0404	12.0219	19.0312	4396.06		17.3314	21.8012	26.271	22.8258	1.02456	1	1		18.5245	11.7019	25.3471	931.823	931.823		3.85638	43.6436	168.306	7345.47	0.126857	0.126857	0.0374045	5495.08
							4.84532	2.2286	1.6143	0.656152	1.5244	21.0701	34.0135	15.2623	24.6379	7902.13		18.9055	23.7508	28.5961	22.674	1.0768	1	1		24.0218	14.8806	33.1629	1550.33	1550.33		2.92598	39.9024	116.754	4658.75	0.332778	0.332778	0.106012	9877.66
							4.31102	2.55933	1.77966	0.524108	1.64595	32.0857	57.1018	22.3112	39.7065	17254.5		19.2436	23.5546	27.8657	25.3633	1.80861	1	1		36.0432	20.2528	51.8336	3297.97	3297.97		2.95456	42.0067	124.111	5213.51	0.632582	0.632582	0.206849	21568.2
							4.68665	1.76131	1.38065	0.677833	1.59662	21.915	30.257	17.1788	23.7179	7652.97		15.3246	20.0112	24.6979	22.0317	2.0205	1	1		21.4005	15.5003	27.3008	1329.43	1329.43		3.89784	46.6869	181.978	8495.97	0.156478	0.156478	0.0562985	9566.21
							5.07667	2.17647	1.58823	0.559158	1.85993	60.5189	96.1181	44.1624	70.1403	67699.7		16.5636	21.6403	26.7169	22.333	0.692731	1	1		69.4842	43.7494	95.219	13087.2	13087.2		5.23251	45.5069	238.115	10835.9			0.390483	84624.7
							3.65911	2.16798	1.58399	0.686184	1.57758	14.0217	22.2102	10.2447	16.2275	2615.63		18.8585	22.5176	26.1767	20.8761	1.64144	1	1		14.5031	9.15605	19.8501	570.981	570.981		3.13108	43.8004	137.143	6006.92	0.0950539	0.0950539	0.0272148	3269.54
							4.75049	2.34935	1.67468	0.701614	1.70731	26.1915	43.8623	18.67	31.2661	12221.5		19.379	24.1295	28.88	21.3862	2.74336	1	1		25.5256	15.2421	35.8091	1714.7	1714.7		3.70581	45.3051	167.892	7606.37	0.22543	0.22543	0.100421	15276.8
							4.51447	1.72976	1.36488	0.559114	1.64231	30.8852	42.1546	24.3702	33.2624	14570		18.3015	22.816	27.3304	24.5993	1.78338	1	1		30.557	22.388	38.726	2723.76	2723.76		2.83323	42.2039	119.574	5046.47	0.539734	0.539734	0.180448	18212.5
							4.67095	2.29206	1.64603	0.666756	1.59317	22.2295	36.5904	15.964	26.2772	8571.64		18.3494	23.0203	27.6913	20.6256	2.39476	1	1		22.5609	13.7062	31.4155	1352.73	1352.73		4.41618	43.7312	193.125	8445.58	0.160171	0.160171	0.0634329	10714.5
							4.3762	1.97123	1.48562	0.7013	1.55524	17.247	25.6224	12.9982	19.3103	4578.77		18.1106	22.4867	26.8629	22.9598	0.47302	1	1		19.1971	12.922	25.4723	1034.06	1034.06		3.75132	38.6608	145.029	5606.93	0.184426	0.184426	0.0510392	5723.46
							4.94526	2.30216	1.65108	0.736861	1.60036	21.0465	34.7494	15.0943	24.9218	8148.89		20.5237	25.469	30.4142	20.0191	5.44984	0	0		#NUM!	#NUM!	#NUM!	#NUM!			3.10563	42.5926	132.277	5634.03	#VALUE!		0.0903981	10186.1
							4.96502	2.3442	1.6721	0.632218	1.70042	33.2634	55.6198	23.7265	39.6732	20584.2		17.527	22.492	27.457	20.5551	1.93692	1	1		36.5297	21.8466	51.2129	3514.9	3514.9		3.31075	47.8418	158.392	7577.77	0.463843	0.463843	0.169775	25730.3
							5.20924	2.04595	1.52297	0.583295	1.646	36.7412	55.9559	27.3497	41.6528	25045.1		18.2302	23.4394	28.6487	23.2866	0.152795	1	1		41.6349	27.3379	55.9319	4803.68	4803.68		3.82354	41.562	158.914	6604.8	0.727302	0.727302	0.236997	31306.4
							4.84512	2.76176	1.88088	0.624899	1.68386	31.462	59.1762	21.427	40.3016	19300.2		17.8087	22.6538	27.4989	21.5329	1.12092	1	1		39.2082	20.8457	57.5708	3770.23	3770.23		3.81405	47.3678	180.663	8557.6	0.440571	0.440571	0.140958	24125.3
							4.3935	1.66076	1.33038	0.633877	1.51514	18.7905	24.9985	15.0525	20.0255	5193.76		19.4469	23.8404	28.2339	20.5659	3.27452	1	1		13.3514	10.0358	16.667	525.482	525.482		2.56264	39.1835	100.413	3934.53	0.133556	0.133556	0.0825028	6492.2
							4.53795	2.04461	1.5223	0.570011	1.66949	31.928	48.604	23.7718	36.1879	16471.9		19.3159	23.8538	28.3918	20.6837	3.17012	1	1		25.8936	17.0095	34.7777	1858.41	1858.41		3.90551	42.1866	164.76	6950.67	0.267372	0.267372	0.148114	20589.9
							5.52107	2.12309	1.56155	0.621998	1.71435	42.2288	65.9422	31.0595	48.5008	35524.7		19.0549	24.5759	30.097	22.9067	1.66923	1	1		46.231	29.6059	62.8561	5846.23	5846.23		4.50179	37.1904	167.424	6226.55			0.356585	44405.9
							4.98154	2.21963	1.60982	0.605222	1.4688	22.111	35.5946	16.0363	25.8154	8933.06		18.4326	23.4141	28.3956	24.0178	0.603654	1	1		25.6252	15.9181	35.3323	1766.9	1766.9		3.2832	39.5612	129.887	5138.48	0.343857	0.343857	0.108654	11166.3
							5.30567	1.85275	1.42637	0.505528	1.62485	45.6002	65.043	35.1062	50.0746	38060.5		15.9905	21.2961	26.6018	23.5326	2.23648	1	1		45.4085	31.8349	58.982	5898.93	5898.93		5.1558	40.0481	206.48	8269.13	0.713367	0.713367	0.28767	47575.6
							4.67812	1.74471	1.37236	0.665659	1.60023	22.6518	31.0863	17.8175	24.4519	8140.22		15.9854	20.6635	25.3416	22.0313	1.36778	1	1		23.3834	17.0389	29.7279	1591.31	1591.31		3.99255	48.1322	192.17	9249.59	0.172042	0.172042	0.055004	10175.3
							4.62705	2.11487	1.55743	0.694552	1.42276	14.8519	23.1308	10.9373	17.034	3677.51		19.6556	24.2826	28.9097	21.7561	2.52649	1	1		14.2706	9.16288	19.3783	557.824	557.824		2.57861	41.8898	108.017	4524.82	0.123281	0.123281	0.0507963	4596.88
							4.80176	2.49765	1.74883	0.622366	1.48091	20.6106	36.0444	14.4313	25.2378	7846.8		17.4807	22.2825	27.0842	24.0163	1.73388	1	1		23.535	13.4576	33.6125	1421.08	1421.08		4.51752	44.0597	199.041	8769.67	0.162045	0.162045	0.0559229	9808.51
							3.98651	2.15729	1.57865	0.66291	1.55533	16.286	25.7098	11.9176	18.8137	3837.35		18.8879	22.8744	26.8609	20.9155	1.95893	1	1		16.3856	10.3795	22.3917	730.157	730.157		3.54275	43.9485	155.698	6842.7	0.106706	0.106706	0.0350497	4796.69
							5.17813	2.61862	1.80931	0.55812	1.69177	43.3207	78.3805	29.932	54.1563	38165.1		19.9705	25.1487	30.3268	22.3308	2.81788	1	1		45.4351	25.1118	65.7584	5187.75	5187.75		3.62796	37.3801	135.613	5069.24			0.470548	47706.4
							4.31484	3.2859	2.14295	0.578481	1.47228	19.2673	41.2889	12.5655	26.9272	7032.79		18.1377	22.4525	26.7673	22.8193	0.366807	1	1		26.8297	12.52	41.1395	1618.13	1618.13		2.67122	47.3718	126.54	5994.45	0.269938	0.269938	0.0733261	8790.99
							5.45023	2.66949	1.83474	0.584678	1.58567	34.4587	63.223	23.6836	43.4533	25638.1		19.5044	24.9546	30.4048	23.3815	1.57309	1	1		41.604	22.6756	60.5323	4312.17	4312.17		3.62021	44.8485	162.361	7281.64	0.592198	0.592198	0.220058	32047.7
							4.59847	2.30116	1.65058	0.737435	1.78951	26.4524	43.6618	18.9738	31.3178	11968		16.6699	21.2684	25.8668	21.9063	0.63796	1	1		31.015	18.7904	43.2396	2552.5	2552.5		3.22385	40.7592	131.401	5355.8	0.476587	0.476587	0.139661	14959.9
							4.11751	2.44001	1.72001	0.537622	1.50708	21.5029	36.9851	15.1578	26.0714	7251.81		18.5525	22.67	26.7875	19.9613	2.70874	1	1		19.6355	11.4159	27.855	998.999	998.999		4.11484	48.3227	198.84	9608.49	0.10397	0.10397	0.0471705	9064.76
							4.04257	2.38778	1.69389	0.756656	1.55503	13.5422	22.9391	9.60686	16.273	2798.76		20.1796	24.2222	28.2648	24.6401	0.417912	1	1		16.1858	9.55539	22.8162	684.923	684.923		3.68083	43.7069	160.877	7031.45	0.0974085	0.0974085	0.0248772	3498.45
							5.13948	1.70568	1.35284	0.604787	1.53658	26.7899	36.2425	21.2481	28.7453	12433.9		18.3703	23.5098	28.6493	22.3231	1.18666	1	1		27.9686	20.6739	35.2632	2290.31	2290.31		3.55688	39.2486	139.602	5479.19	0.418002	0.418002	0.141831	15542.4
							5.6588	2.3384	1.6692	0.705537	1.74698	37.9865	63.407	27.1156	45.2613	30565.4		16.6529	22.3116	27.9704	18.6944	3.61723	1	1		34.8069	20.8525	48.7614	3194.36	3194.36		3.20105	42.0944	134.746	5672.07	0.563174	0.563174	0.336798	38206.7
							4.40636	2.6565	1.82825	0.744566	1.56527	16.1683	29.5597	11.1273	20.3435	4553.24		19.3314	23.7378	28.1442	24.8775	1.13972	1	1		19.6512	10.7487	28.5538	964.202	964.202		2.47175	44.9752	111.168	4999.78	0.192849	0.192849	0.0569179	5691.54
							5.75972	1.85166	1.42583	0.784322	1.38038	15.6777	22.3537	12.0723	17.213	4883.03		18.2942	24.0539	29.8136	22.0203	2.03364	1	1		16.1044	11.2947	20.914	742.1	742.1		2.5008	47.4784	118.734	5637.29	0.131641	0.131641	0.0541377	6103.79
							5.56499	2.82167	1.91083	0.702827	1.63089	29.2107	55.8167	19.7815	37.7991	19303.6		18.731	24.296	29.861	24.1715	0.124466	1	1		37.7896	19.7765	55.8027	3467.01	3467.01		3.22868	39.4405	127.341	5022.38	0.690313	0.690313	0.240219	24129.5
							5.04665	3.12934	2.06467	0.624989	1.74308	38.1243	78.714	25.1536	51.9338	31391		18.5243	23.5709	28.6176	20.3484	3.2225	1	1		39.9675	19.3579	60.5772	3683.97	3683.97		4.25081	48.5624	206.429	10024.7	0.36749	0.36749	0.19571	39238.7
							5.72058	2.0939	1.54695	0.649422	1.59988	32.4895	50.2596	24.0028	37.1312	21680.6		19.138	24.8586	30.5792	22.3724	2.48617	1	1		33.4412	21.6175	45.265	3074.1	3074.1		4.67706	41.9888	196.384	8245.94	0.372801	0.372801	0.164328	27100.8
							4.39775	1.92862	1.46431	0.616972	1.79185	33.7586	49.4331	25.6313	37.5322	17505.3		17.3234	21.7211	26.1189	25.3356	3.61448	1	1		21.3799	14.6007	28.1592	1291.65	1291.65		2.94098	42.1834	124.061	5233.3	0.246813	0.246813	0.209062	21881.7
							5.19399	1.99056	1.49528	0.578569	1.50735	27.3353	40.8739	20.5338	30.7039	13695.2		17.5361	22.7301	27.9241	23.6156	0.885518	1	1		30.2544	20.2332	40.2755	2560.09	2560.09		4.33554	44.4431	192.685	8563.5	0.298954	0.298954	0.099953	17118.9
							4.51666	2.04489	1.52245	0.725017	1.60186	18.7338	28.5212	13.9475	21.2343	5644.57		16.9987	21.5153	26.032	25.1551	3.63982	1	1		12.5728	8.25829	16.8873	438.128	438.128		3.02587	42.5188	128.656	5470.31	0.0800919	0.0800919	0.064491	7055.72
							4.90254	2.08402	1.54201	0.597757	1.67609	34.0232	52.4642	25.1745	38.8193	20342.1		16.321	21.2236	26.1261	23.524	2.30046	1	1		34.2803	22.2309	46.3297	3235.68	3235.68		4.71278	43.1207	203.219	8762.92	0.369247	0.369247	0.145086	25427.6
							4.16946	3.04742	2.02371	0.472031	1.65158	36.5234	73.9127	24.2542	49.0835	23482		17.4402	21.6096	25.7791	24.0396	2.42991	1	1		39.8864	19.7096	60.0633	3719.08	3719.08		3.50954	38.2731	134.321	5140.87	0.723434	0.723434	0.285482	29352.5
							4.85258	2.01833	1.50916	0.66392	1.72541	30.9393	46.6924	23.1342	34.9133	16467.4		19.8371	24.6897	29.5423	24.7107	0.0210524	1	1		34.913	23.134	46.692	3393.46	3393.46		2.78113	39.1474	108.874	4262.14	0.796188	0.796188	0.241477	20584.2
							3.66612	2.13609	1.56805	0.73738	1.49497	10.9969	17.2436	8.07252	12.6581	1603.22		21.1828	24.849	28.5151	17.1287	7.72023	0	0		#NUM!	#NUM!	#NUM!	#NUM!			3.65074	44.2429	161.519	7146.08	#VALUE!		0.0140219	2004.03
							4.3163	2.19494	1.59747	0.730077	1.74977	22.4066	35.7939	16.3075	26.0507	7915.13		17.5808	21.8971	26.2134	23.0147	1.11755	1	1		25.1624	15.7514	34.5734	1710.85	1710.85		2.65438	47.6371	126.447	6023.57	0.284025	0.284025	0.0821267	9893.92
							5.24366	1.76875	1.38438	0.665887	1.58739	26.4651	36.6376	20.7138	28.6757	12501.8		16.247	21.4907	26.7343	23.3062	1.81549	1	1		26.9021	19.4327	34.3716	2098.37	2098.37		2.52134	44.0174	110.983	4885.19	0.429538	0.429538	0.159945	15627.2
							4.72712	2.08599	1.543	0.582195	1.79268	42.7061	65.8954	31.5895	48.7425	30913.2		16.7536	21.4807	26.2079	20.2632	1.21754	1	1		47.0979	30.5237	63.6722	6105.71	6105.71		2.0645	38.9168	80.3438	3126.72			0.617923	38641.5
							4.79852	2.78506	1.89253	0.477299	1.51117	32.7091	61.9029	22.2268	42.0649	20741.7		15.7053	20.5038	25.3023	20.8994	0.395655	1	1		41.9216	22.1511	61.6922	4293.14	4293.14		4.07498	45.2983	184.59	8361.6	0.513436	0.513436	0.155037	25927.2
							5.956	1.89776	1.44888	0.487428	1.56604	50.3911	73.0107	38.472	55.7413	52557.6		19.8324	25.7884	31.7444	23.985	1.80342	1	1		53.1247	36.666	69.5833	8015.28	8015.28		2.54654	47.042	119.794	5635.35			0.582901	65697
							4.51199	2.66001	1.83	0.641228	1.66258	25.6329	46.9084	17.6347	32.2715	11725.6		20.9317	25.4437	29.9557	22.7523	2.69135	1	1		25.9018	14.154	37.6497	1674.13	1674.13		3.36231	39.4236	132.554	5225.78	0.320361	0.320361	0.140238	14657
							4.62543	2.06076	1.53038	0.628596	1.57662	23.2585	35.5943	17.2724	26.4334	8933.78		19.9777	24.6031	29.2286	23.1359	1.46724	1	1		25.0682	16.3804	33.756	1737.1	1737.1		2.66332	39.4967	105.193	4154.76	0.418099	0.418099	0.134391	11167.2
							4.49989	2.07634	1.53817	0.871998	1.73608	17.2696	26.5635	12.7934	19.6785	4804.24		19.2544	23.7543	28.2542	22.9351	0.81923	1	1		19.3496	12.5796	26.1196	1032.25	1032.25		1.89809	43.0224	81.6604	3513.22	0.293818	0.293818	0.085467	6005.3
							4.42987	2.11461	1.55731	0.807084	1.58646	14.8986	23.2016	10.972	17.0868	3542.8		19.8041	24.2339	28.6638	19.4267	4.80729	0	0		#NUM!	#NUM!	#NUM!	#NUM!			2.56086	40.6798	104.175	4237.83	#VALUE!		0.0522496	4428.5
							3.91837	1.94911	1.47455	0.593742	1.67674	23.6648	34.895	17.9031	26.399	7690.34		20.527	24.4454	28.3638	27.191	2.74566	1	1		18.8342	12.7728	24.8956	998.982	998.982		2.51196	40.5417	101.839	4128.74	0.241958	0.241958	0.116415	9612.92
							4.11501	1.69977	1.34989	0.710296	1.58865	16.294	21.995	12.94	17.4675	3679.41		18.6013	22.7164	26.8314	19.4018	3.31455	1	1		10.3517	7.66858	13.0348	314.03	314.03		2.84453	37.8056	107.539	4065.57	0.0772412	0.0772412	0.0565636	4599.26
							4.74941	2.13897	1.56949	0.655371	1.55186	21.6191	33.9308	15.8631	24.897	8031.07		18.6767	23.4261	28.1755	23.4684	0.0422272	1	1		24.896	15.8625	33.9295	1690.83	1690.83		3.0571	43.5498	133.136	5798.05	0.29162	0.29162	0.0865708	10038.8
							5.14215	2.77782	1.88891	0.54813	1.76251	51.7151	97.6851	35.1662	66.4257	55494.3		18.6017	23.7439	28.886	22.6784	1.06549	1	1		64.984	34.4029	95.5651	10328.7	10328.7		3.93663	40.0954	157.841	6328.71			0.548041	69367.8
							5.18285	2.67526	1.83763	0.832685	1.63316	19.8094	36.4024	13.607	25.0047	8065.14		16.9283	22.1112	27.294	18.8202	3.29095	1	1		19.3171	10.5119	28.1222	928.714	928.714		3.23101	40.8506	131.989	5391.82	0.172245	0.172245	0.0934882	10081.4
							3.8967	2.21976	1.60988	0.528008	1.57208	23.1555	37.2776	16.7935	27.0356	7663.67		19.7906	23.6873	27.584	21.8078	1.87944	1	1		23.6831	14.7111	32.6551	1509.2	1509.2		3.76909	47.195	177.882	8395.16	0.17977	0.17977	0.0570542	9579.59
							3.99795	2.04154	1.52077	0.577308	1.53174	19.3787	29.4706	14.4354	21.953	5343.26		17.0632	21.0612	25.0591	23.5605	2.49931	1	1		17.1345	11.267	23.002	814.185	814.185		4.78853	46.0955	220.73	10174.6	0.0800211	0.0800211	0.0328222	6679.08
							4.68968	2.17122	1.58561	0.545755	1.64957	34.7485	55.0976	25.3763	40.2369	20599.4		17.4945	22.1842	26.8739	20.149	2.03513	1	1		36.2508	22.8623	49.6392	3565.29	3565.29		2.06098	39.4857	81.3793	3213.32			0.400664	25749.2
							4.48509	2.10531	1.55266	0.786726	1.60648	16.3838	25.4385	12.083	18.7607	4330.98		17.494	21.979	26.4641	20.9278	1.05125	1	1		18.2381	11.7464	24.7298	912.589	912.589		2.41509	43.9083	106.042	4656.14	0.195997	0.195997	0.0581353	5413.73
							5.85583	2.75343	1.87671	0.553442	1.56797	40.4023	75.8236	27.5379	51.6808	38412.6		18.685	24.5409	30.3967	21.8975	2.6434	1	1		46.1155	24.5725	67.6585	5223.02	5223.02		2.93389	38.2232	112.143	4286.45			0.560087	48015.7
							5.10769	2.1552	1.5776	0.595805	1.70063	38.6272	60.9384	28.275	44.6067	27648.3		16.4259	21.5336	26.6413	20.4223	1.11125	1	1		43.5382	27.5977	59.4787	5156.84	5156.84		2.90776	48.3164	140.493	6788.11	0.759688	0.759688	0.254565	34560.3
							5.4943	1.73452	1.36726	0.546456	1.52039	33.4174	45.6902	26.3417	36.016	20774.5		18.2797	23.774	29.2683	21.1141	2.65991	1	1		31.514	23.049	39.979	2894.9	2894.9		2.52769	44.1245	111.533	4921.34	0.588235	0.588235	0.263831	25968.1
							5.02912	2.01344	1.50672	0.701897	1.80735	35.1301	52.9314	26.289	39.6102	21985.1		16.1218	21.1509	26.18	24.7361	3.58519	1	1		27.7778	18.4359	37.1197	2149.9	2149.9		3.72385	44.5506	165.9	7390.92	0.290884	0.290884	0.185913	27481.3
							5.53906	2.53555	1.76777	0.497133	1.62248	49.9664	88.3293	34.8364	61.5828	53545.6		17.4955	23.0345	28.5736	23.1976	0.163119	1	1		61.5561	34.8212	88.291	9658.52	9658.52		3.44485	43.3969	149.496	6487.66			0.515841	66932
							4.52714	2.89491	1.94745	0.597923	1.4906	20.441	39.8078	13.751	26.7794	7785.3		18.6885	23.2156	27.7427	22.5225	0.693128	1	1		26.4637	13.5889	39.3385	1679.38	1679.38		3.31486	39.0669	129.501	5059.21	0.331946	0.331946	0.0961773	9731.62
							4.59428	1.96022	1.48011	0.75252	1.67995	20.8898	30.9192	15.7733	23.3463	7039.13		17.3522	21.9465	26.5408	21.9254	0.0210941	1	1		23.346	15.7731	30.9189	1532.12	1532.12		3.09151	43.3626	134.056	5813.01	0.263567	0.263567	0.0756829	8798.91
							4.86642	1.92281	1.46141	0.622125	1.56452	24.9826	36.5097	18.9877	27.7487	10598.4		16.5099	21.3763	26.2427	21.6299	0.253563	1	1		27.711	18.9619	36.4601	2171.94	2171.94		3.1244	36.3654	113.62	4131.85	0.525659	0.525659	0.160315	13248
							5.55118	2.34045	1.67023	0.758335	1.66854	27.7008	46.2666	19.7682	33.0174	15950.4		18.9494	24.5006	30.0518	23.2169	1.28373	1	1		32.1224	19.2324	45.0125	2719.67	2719.67		3.57949	42.118	150.761	6349.74	0.428312	0.428312	0.156998	19938
							4.65796	2.70443	1.85222	0.719115	1.66767	22.5497	41.767	15.4439	28.6054	9439.22		18.7378	23.3957	28.0537	20.3244	3.07131	1	1		21.5062	11.6111	31.4013	1145.43	1145.43		4.28798	42.5118	182.29	7749.45	0.147808	0.147808	0.0761281	11799
							4.23901	2.3866	1.6933	0.766425	1.62331	16.0614	27.1968	11.3956	19.2962	4127.34		17.946	22.185	26.424	20.9815	1.20356	1	1		18.5021	10.9267	26.0775	895.167	895.167		2.96749	44.4012	131.76	5850.31	0.153012	0.153012	0.0440932	5159.18
							5.01023	2.32918	1.66459	0.577199	1.73465	42.4647	70.6863	30.3482	50.5172	33765.7		17.6161	22.6263	27.6365	18.6023	4.02395	1	1		30.0972	18.0808	42.1135	2392.16	2392.16		3.67468	40.3701	148.347	5988.78	0.39944	0.39944	0.352384	42207.1
							4.48992	1.752	1.376	0.660004	1.57888	20.6405	28.4014	16.2108	22.3061	6494.29		17.8773	22.3672	26.8571	23.0591	0.691941	1	1		22.0396	16.0171	28.0621	1412.06	1412.06		2.54318	40.3397	102.591	4138.49	0.341203	0.341203	0.0980776	8117.87
							4.81804	2.36785	1.68393	0.679824	1.64373	25.0003	42.0986	17.7792	29.9389	11329.2		20.5792	25.3972	30.2152	21.6093	3.7879	1	1		18.5018	10.9873	26.0162	898.016	898.016		2.97004	39.0529	115.989	4529.7	0.198251	0.198251	0.156319	14161.5
							4.73129	2.37968	1.68984	0.738649	1.71022	23.9534	40.4774	17.0096	28.7435	10233.8		18.7433	23.4746	28.2059	24.3377	0.863109	1	1		28.2612	16.7241	39.7982	2091.01	2091.01		4.70563	39.9866	188.162	7523.97	0.277914	0.277914	0.0850097	12792.2
							5.08798	1.77365	1.38682	0.667803	1.71689	32.668	45.3048	25.5433	35.424	18497.6		17.9355	23.0234	28.1114	26.3543	3.33082	1	1		26.7783	19.3091	34.2475	2077.5	2077.5		2.33457	43.9236	102.543	4504.04	0.461253	0.461253	0.256681	23122
							5.60794	2.37229	1.68614	0.764215	1.50095	19.9161	33.5814	14.1557	23.8685	8374.95		18.3485	23.9564	29.5644	21.7996	2.15687	1	1		22.0325	13.0668	30.9983	1272.5	1272.5		2.30646	44.8089	103.35	4631	0.274778	0.274778	0.113028	10468.7
							4.5639	1.59821	1.2991	0.635344	1.72512	30.0102	38.9863	24.3938	31.6901	13635.7		17.4688	22.0327	26.5966	23.3641	1.33137	1	1		30.3117	23.3328	37.2906	2733.48	2733.48		3.38298	44.725	151.304	6767.08	0.403938	0.403938	0.125938	17044.7
							5.8303	2.48022	1.74011	0.569376	1.57224	38.7638	67.4533	27.1965	47.3249	33601.4		17.9893	23.8196	29.6499	24.8432	1.02359	1	1		46.5898	26.7741	66.4056	5585.59	5585.59		3.31332	41.5923	137.809	5731.78			0.366394	42001.7
							4.79996	1.76227	1.38114	0.587725	1.52535	24.616	33.9981	19.2922	26.6451	9890.61		19.5629	24.3629	29.1628	24.0518	0.311046	1	1		26.5891	19.2516	33.9266	2051.91	2051.91		3.28843	40.3365	132.644	5350.39	0.383506	0.383506	0.115536	12363.3
							5.15078	1.71958	1.35979	0.636736	1.4742	21.7993	29.6425	17.2382	23.4403	8268.55		16.6293	21.7801	26.9308	20.3306	1.44942	1	1		22.4931	16.5416	28.4446	1478.19	1478.19		4.46111	36.8223	164.269	6048.75	0.244379	0.244379	0.0854366	10335.7
							5.01617	2.31039	1.65519	0.786806	1.62183	20.1728	33.3899	14.4521	23.921	7604.46		18.4857	23.5019	28.5181	23.706	0.204043	1	1		23.9012	14.4401	33.3623	1513.48	1513.48		2.91451	46.9517	136.841	6424.92	0.235564	0.235564	0.0739743	9505.58
							4.3935	2.90894	1.95447	0.534329	1.567	27.1524	53.0686	18.2433	35.6559	13362.9		18.8617	23.2551	27.6486	23.8974	0.642287	1	1		35.2729	18.0473	52.4984	2976.51	2976.51		4.0976	41.5024	170.06	7057.92	0.421727	0.421727	0.118332	16703.6
							4.05253	2.61863	1.80932	0.7184	1.56104	14.8902	26.9412	10.2883	18.6147	3528.86		20.619	24.6715	28.7241	23.8673	0.804286	1	1		18.2444	10.0836	26.4053	836.48	836.48		3.33234	43.7832	145.9	6387.99	0.130946	0.130946	0.0345263	4411.07
							4.85683	2.51239	1.7562	0.707381	1.76912	30.2148	53.0631	21.1206	37.0918	17100.2		20.3643	25.2211	30.0779	24.0899	1.1312	1	1		36.0717	20.5397	51.6038	3329.86	3329.86		3.14033	46.9051	147.297	6908.99	0.48196	0.48196	0.154691	21375.2
							5.11266	1.88103	1.44051	0.518369	1.74394	54.1363	77.9841	41.4583	59.7212	51929.5		20.7911	25.9037	31.0164	21.4261	4.47764	1	1		28.8266	20.0113	37.6419	2366.45	2366.45		3.14429	44.1864	138.935	6139.04	0.385476	0.385476	0.528681	64911.8
							3.86694	2.09889	1.54945	0.550802	1.69621	27.2661	42.2473	20.1284	31.1878	10330.6		16.3676	20.2346	24.1015	24.906	4.67147	1	0		#NUM!	#NUM!	#NUM!	#NUM!			3.25486	41.8717	136.287	5706.56	#VALUE!		0.113144	12913.2
							5.17609	2.36431	1.68216	0.642544	1.74688	38.269	64.3745	27.2275	45.801	28501.9		19.1486	24.3247	29.5008	18.671	5.65377	0	0		#NUM!	#NUM!	#NUM!	#NUM!			2.16376	40.223	87.0327	3500.72	#VALUE!		0.508858	35627.4
							4.05223	2.02553	1.51277	0.711915	1.71565	19.7594	29.8914	14.7573	22.3243	5615.6		17.7254	21.7776	25.8298	20.8061	0.971553	1	1		21.6732	14.3268	29.0195	1306.14	1306.14		3.39178	39.7283	134.749	5353.36	0.243986	0.243986	0.0655616	7019.5
							4.287	1.85119	1.42559	0.646275	1.55818	19.0726	27.1898	14.6878	20.9388	5378.54		18.8247	23.1117	27.3987	24.4471	1.33546	1	1		19.8969	13.9569	25.8369	1132.87	1132.87		2.92041	40.7731	119.074	4855.01	0.23334	0.23334	0.0692395	6723.17
							3.86204	1.90756	1.45378	0.672555	1.72097	20.2474	29.4353	15.4309	22.4331	5510.93		17.8112	21.6732	25.5353	23.0749	1.4017	1	1		20.9034	14.3787	27.4281	1238.98	1238.98		1.98894	45.5201	90.5369	4121.24	0.300633	0.300633	0.0835751	6888.66
							4.85227	2.18559	1.5928	0.641513	1.64891	28.1167	44.7842	20.4907	32.6374	13988.6		17.0094	21.8616	26.7139	24.6762	2.8146	1	1		26.5856	16.6912	36.48	1912.9	1912.9		1.97197	41.0893	81.027	3329.34	0.574557	0.574557	0.262601	17485.8
							5.03162	2.81069	1.90534	0.817366	1.67034	20.8156	39.6608	14.1107	26.8858	8846.45		19.8392	24.8708	29.9024	25.8222	0.9514	1	1		26.4008	13.8562	38.9454	1695.31	1695.31		2.52929	38.6365	97.7228	3775.67	0.44901	0.44901	0.146438	11058.1
							4.53937	2.49501	1.7475	0.620588	1.58816	23.5762	41.1996	16.5128	28.8562	9701.95		20.0782	24.6175	29.1569	23.5609	1.05659	1	1		28.0636	16.0593	40.068	2021.5	2021.5		4.505	46.0918	207.643	9570.64	0.211218	0.211218	0.0633575	12127.4
							5.27966	2.79477	1.89739	0.452212	1.71923	68.3714	129.727	46.4177	88.0724	99878.2		16.6051	21.8848	27.1645	24.9783	3.09346	1	1		71.3711	37.6155	105.127	12423.1	12423.1		4.20936	41.6993	175.527	7319.36			0.852859	124848
							5.1681	2.18493	1.59247	0.669255	1.6016	26.4119	42.0601	19.2501	30.6551	13145.7		17.1348	22.3029	27.471	22.1751	0.1278	1	1		30.6457	19.2442	42.0473	2542.07	2542.07		2.92304	38.4713	112.453	4326.21	0.587598	0.587598	0.189914	16432.1
							3.94412	1.69566	1.34783	0.644863	1.54825	16.507	22.2486	13.1209	17.6848	3617.16		18.0803	22.0244	25.9685	23.3876	1.36318	1	1		16.5949	12.3123	20.8775	807.549	807.549		3.00321	42.5214	127.701	5430.01	0.148719	0.148719	0.0416339	4521.45
							5.19181	1.55128	1.27564	0.573192	1.50235	27.4018	34.9549	22.5329	28.7439	12846.8		19.832	25.0238	30.2156	22.8892	2.13454	1	1		26.2022	20.5404	31.864	2056.17	2056.17		3.01718	43.1295	130.129	5612.41	0.366361	0.366361	0.143062	16058.4
							3.84548	1.90163	1.45081	0.58855	1.56973	19.0368	27.6188	14.5238	21.0713	4846.02		18.9593	22.8048	26.6502	22.6569	0.147837	1	1		21.0557	14.513	27.5984	1258.32	1258.32		4.10005	36.7942	150.858	5550.7	0.226697	0.226697	0.0545654	6057.53
							4.82812	1.85298	1.42649	0.619601	1.62397	28.0569	40.0228	21.5992	30.811	13112.1		16.4076	21.2358	26.0639	22.8215	1.58569	1	1		29.1019	20.4011	37.8027	2422.85	2422.85		4.45891	44.4248	198.086	8799.95	0.275325	0.275325	0.0931264	16390.2
							5.08039	2.0037	1.50185	0.492382	1.78494	64.4469	96.7897	48.3054	72.5475	74622.7		19.3439	24.4243	29.5047	23.2339	1.19038	1	1		70.5279	46.9606	94.0952	13882	13882		3.86485	44.0674	170.314	7505.27			0.621419	93278.4
							4.73875	1.71549	1.35775	0.633712	1.61757	25.9053	35.1729	20.5031	27.838	10735.9		20.8691	25.6078	30.3466	21.0336	4.57425	1	1		7.27107	5.35524	9.18689	154.56	154.56		2.83097	37.8453	107.139	4054.69	0.0381188	0.0381188	0.165486	13419.9
							4.96358	2.71034	1.85517	0.717615	1.74084	28.9828	53.7681	19.8381	36.8031	16633		19.8971	24.8607	29.8243	25.0944	0.23372	1	1		36.7623	19.8161	53.7084	3343.58	3343.58		3.3274	40.0242	133.176	5330.28	0.62728	0.62728	0.195029	20791.2
							3.86421	1.73681	1.36841	0.69787	1.62323	16.0889	22.0161	12.6762	17.3461	3387.96		19.0182	22.8824	26.7467	25.5722	2.68972	1	1		12.4543	9.1013	15.8072	451.969	451.969		2.35993	43.8928	103.584	4546.61	0.0994081	0.0994081	0.0465727	4234.95
							4.6846	2.38529	1.69265	0.706873	1.61606	21.2483	35.9658	15.0781	25.522	7981.04		17.7373	22.4219	27.1065	24.0828	1.66097	1	1		23.8639	14.0986	33.6292	1489.5	1489.5		3.32958	44.06	146.701	6463.65	0.230443	0.230443	0.0771723	9976.3
							4.7741	2.03742	1.51871	0.718196	1.51813	17.7373	26.9378	13.2215	20.0796	5341.75		18.6028	23.3769	28.151	22.0954	1.28152	1	1		19.3427	12.7362	25.9491	1038.28	1038.28		3.23479	44.9942	145.547	6548.76	0.158546	0.158546	0.0509805	6677.19
							5.0572	2.54645	1.77323	0.678213	1.50465	20.5529	36.4449	14.312	25.3784	8287.01		17.8656	22.9228	27.98	22.3801	0.542641	1	1		25.2319	14.2294	36.2345	1619.79	1619.79		3.2022	37.2507	119.284	4443.43	0.364535	0.364535	0.116563	10358.8
							4.04754	2.53553	1.76777	0.709382	1.82394	23.9589	42.3536	16.7041	29.5288	8996.09		17.3864	21.4339	25.4815	21.3123	0.121683	1	1		29.5155	16.6965	42.3345	2220.6	2220.6		2.95594	42.9078	126.833	5442.12	0.408039	0.408039	0.103316	11245.1
							5.65754	2.0588	1.5294	0.727113	1.60253	26.7853	40.9654	19.8977	30.4316	14487.7		19.6096	25.2672	30.9247	26.6333	1.36614	1	1		29.531	19.3089	39.7532	2411.45	2411.45		1.87042	41.9906	78.5402	3297.95	0.731198	0.731198	0.274558	18109.6
							4.74833	1.62131	1.31065	0.664641	1.46879	17.9589	23.5379	14.5178	19.0279	5097.53		18.0202	22.7685	27.5168	25.6038	2.83527	1	1		15.2634	11.6456	18.8811	690.782	690.782		5.08799	43.0693	219.136	9438.01	0.0731914	0.0731914	0.0337566	6371.91
							4.71909	2.45741	1.7287	0.708848	1.8621	34.1253	58.9925	24.006	41.4993	20995.5		15.382	20.1011	24.8202	19.7304	0.370718	1	1		41.371	23.9318	58.8102	4421.59	4421.59		3.71678	45.3793	168.665	7653.87	0.577694	0.577694	0.171445	26244.3
							5.29543	2.07973	1.53987	0.563643	1.5543	32.522	50.0796	24.0798	37.0797	20061.6		19.9759	25.2713	30.5667	22.8725	2.39878	1	1		33.0571	21.4675	44.6467	3011.08	3011.08		3.66972	47.9397	175.925	8433.8	0.357025	0.357025	0.14867	25077
							4.60507	2.03097	1.51549	0.618167	1.6386	26.858	40.703	20.0411	30.372	11801.4		18.5519	23.157	27.7621	23.0812	0.0758164	1	1		30.3679	20.0384	40.6974	2562	2562		4.08588	39.6286	161.918	6416.57	0.399279	0.399279	0.114951	14751.8
							5.31178	1.80252	1.40126	0.696409	1.83978	42.0126	58.8706	32.6602	45.7654	32085.4		19.1191	24.4309	29.7426	24.0386	0.392245	1	1		45.6404	32.571	58.7098	6007.48	6007.48		2.59326	38.5558	99.9851	3855			0.52019	40106.7
							4.78844	2.39391	1.69696	0.671613	1.37852	14.9961	25.4478	10.6302	18.039	4069.44		18.1585	22.9469	27.7354	20.9201	2.02686	1	1		16.3433	9.63094	23.0556	697.583	697.583		3.11061	39.0449	121.454	4742.14	0.147103	0.147103	0.053634	5086.8
							4.76266	2.0042	1.5021	0.647906	1.57001	22.917	34.4237	17.1757	25.7997	8846.51		16.7239	21.4866	26.2493	21.2758	0.210802	1	1		25.7744	17.1589	34.3899	1853.83	1853.83		6.22007	47.6214	296.209	14105.9	0.131423	0.131423	0.0391969	11058.1
							4.9323	1.77177	1.38588	0.614197	1.50658	23.071	31.9737	18.0462	25.0099	8940.82		18.7087	23.641	28.5733	21.7042	1.93679	1	1		23.0011	16.5967	29.4054	1533.2	1533.2		3.09572	40.9827	126.871	5199.52	0.294873	0.294873	0.107472	11176
							4.96413	2.1357	1.56785	0.653312	1.61687	26.5468	41.6215	19.4884	30.5549	12649.9		17.6606	22.6248	27.5889	23.0672	0.44245	1	1		30.4333	19.4109	41.4558	2528.02	2528.02		4.46726	46.8064	209.096	9787.06	0.258302	0.258302	0.0807821	15812.4
							4.37588	2.14364	1.57182	0.730017	1.5106	14.957	23.5096	10.9672	17.2384	3544.51		18.1439	22.5197	26.8956	26.0117	3.49192	1	1		10.389	6.60957	14.1685	294.203	294.203		5.10672	41.6391	212.639	8854.09	0.0332279	0.0332279	0.0250203	4430.64
							5.11602	2.28307	1.64153	0.728263	1.55827	20.8592	34.241	14.9978	24.6194	8253.85		15.998	21.114	26.2301	22.8024	1.68835	1	1		23.2401	14.1576	32.3227	1437.63	1437.63		3.47367	44.029	152.942	6733.89	0.213492	0.213492	0.0766074	10317.3
							4.56299	2.06037	1.53019	0.766153	1.52921	15.3123	23.4306	11.372	17.4013	3819.63		20.0629	24.6259	29.1889	21.5564	3.06947	1	1		12.8757	8.41447	17.3369	458.299	458.299		2.3393	41.5684	97.2409	4042.15	0.11338	0.11338	0.0590594	4774.54
							4.80032	2.2897	1.64485	0.733144	1.61888	20.9477	34.4557	15.0482	24.7519	7819.25		18.6976	23.498	28.2983	24.65	1.15201	1	1		24.0286	14.6084	33.4488	1535.09	1535.09		2.59102	47.1745	122.23	5766.13	0.266225	0.266225	0.0847541	9774.07
							5.04278	2.44367	1.72183	0.664155	1.75788	35.2889	60.7616	24.8649	42.8133	23935.2		16.4432	21.486	26.5288	16.6548	4.83119	1	1		12.2716	7.12708	17.4162	389.956	389.956		3.5983	44.9421	161.715	7267.82	0.0536551	0.0536551	0.205832	29919
							4.41722	2.33891	1.66945	0.569586	1.51182	22.1257	36.9379	15.7928	26.3653	8095.24		19.3792	23.7964	28.2136	18.2321	5.56435	0	0		#NUM!	#NUM!	#NUM!	#NUM!			2.26472	42.8052	96.9419	4149.62	#VALUE!		0.121927	10119
							4.94658	1.90812	1.45406	0.574579	1.62209	32.8535	47.771	25.0356	36.4033	18585.6		17.2787	22.2252	27.1718	26.1735	3.94823	1	1		21.9303	15.0821	28.7785	1363.58	1363.58		5.33201	47.4465	252.985	12003.3	0.113601	0.113601	0.0967737	23232
							3.93614	2.27814	1.63907	0.651029	1.5254	15.5617	25.5067	11.1963	18.3515	3531.41		17.4645	21.4006	25.3368	22.504	1.10334	1	1		17.6157	10.7474	24.4841	826.68	826.68		4.39504	44.9057	197.362	8862.69	0.0932764	0.0932764	0.0249036	4414.26
							3.58091	1.92783	1.46392	0.685949	1.56082	13.1888	19.3073	10.015	14.6612	2175.3		17.4993	21.0802	24.6611	22.505	1.4248	1	1		13.4507	9.18814	17.7132	511.298	511.298		2.74711	41.6735	114.482	4770.85	0.107171	0.107171	0.0284972	2719.12
							5.36168	1.77935	1.38968	0.697838	1.58864	25.5162	35.4593	19.9282	27.6937	11902.8		17.3456	22.7073	28.0689	21.7953	0.911962	1	1		27.2902	19.6378	34.9426	2155.75	2155.75		2.98924	43.7043	130.643	5709.63	0.377563	0.377563	0.130293	14878.5
							4.91067	2.15676	1.57838	0.639318	1.60293	26.2587	41.4463	19.2169	30.3316	12287.4		17.7878	22.6985	27.6092	21.4283	1.27018	1	1		29.2994	18.563	40.0358	2334.78	2334.78		2.39477	44.8664	107.445	4820.66	0.484328	0.484328	0.159307	15359.3
							4.84454	2.24685	1.62343	0.731593	1.543	18.4833	30.0063	13.3548	21.6806	6098.92		18.7211	23.5656	28.4102	23.8547	0.289092	1	1		21.6419	13.331	29.9528	1254.44	1254.44		3.45066	37.8634	130.654	4946.99	0.253577	0.253577	0.0770534	7623.65
							4.25521	1.83199	1.416	0.558167	1.72138	33.0008	46.729	25.5072	36.1181	15933.8		17.2774	21.5326	25.7878	23.4127	1.88014	1	1		32.4013	22.8823	41.9202	3013.51	3013.51		4.49482	46.565	209.301	9746.11	0.309202	0.309202	0.102181	19917.3
							5.09841	2.25271	1.62635	0.557588	1.57249	32.4607	52.7926	23.4352	38.1139	19816.5		19.8945	24.9929	30.0913	24.7419	0.251007	1	1		38.0677	23.4068	52.7286	3877.38	3877.38		5.26299	39.3424	207.059	8146.17	0.475975	0.475975	0.152038	24770.6
							5.06538	2.36004	1.68002	0.764065	1.70713	25.2567	42.4318	17.9792	30.2055	12140.2		20.1198	25.1852	30.2506	22.4761	2.70915	1	1		25.5223	15.1916	35.853	1711.12	1711.12		4.57647	40.3151	184.501	7438.17	0.230045	0.230045	0.102009	15175.2
							6.09814	2.19083	1.59541	0.599971	1.39297	25.2819	40.3352	18.4109	29.373	14226.8		18.4855	24.5836	30.6818	24.3313	0.252353	1	1		29.3479	18.3952	40.3006	2328.97	2328.97		3.61119	40.5037	146.267	5924.33	0.39312	0.39312	0.150088	17783.5
							4.59197	2.10598	1.55299	0.717871	1.60951	19.824	30.7864	14.6186	22.7025	6492.53		21.3397	25.9316	30.5236	20.3798	5.55187	0	0		#NUM!	#NUM!	#NUM!	#NUM!			2.34357	37.6272	88.182	3318.05	#VALUE!		0.122296	8115.66
							5.22638	1.9689	1.48445	0.573592	1.58122	32.9103	48.8537	24.8127	36.8332	19903.2		18.4391	23.6655	28.8919	24.1704	0.50486	1	1		36.661	24.6967	48.6253	3772.68	3772.68		4.37047	43.9684	192.163	8449.1	0.446519	0.446519	0.147229	24879
							4.58671	2.08323	1.54161	0.598932	1.51567	21.8796	33.7299	16.1912	24.9605	7869.46		16.3396	20.9263	25.513	20.8195	0.106728	1	1		24.9538	16.1868	33.7208	1714.78	1714.78		2.56434	44.1174	113.132	4991.1	0.343568	0.343568	0.0985437	9836.82
							4.80434	2.3259	1.66295	0.768415	1.43158	13.7909	22.9336	9.8601	16.3968	3413		17.6565	22.4608	27.2652	20.5489	1.91197	1	1		15.0424	9.04565	21.0392	597.888	597.888		2.95847	44.048	130.315	5740.1	0.10416	0.10416	0.0371619	4266.25
							4.4785	2.51162	1.75581	0.623283	1.75007	31.5385	55.3756	22.0478	38.7117	17177.7		16.5247	21.0032	25.4817	16.8499	4.15326	1	1		14.4832	8.24873	20.7177	536.881	536.881		5.03252	49.4501	248.859	12306.1	0.0436273	0.0436273	0.0872421	21472.2
							5.69297	1.98442	1.49221	0.605401	1.54204	31.6859	47.2819	23.8266	35.5543	20148.7		15.9834	21.6764	27.3693	18.8343	2.84204	1	1		30.8069	20.6452	40.9687	2657.17	2657.17		5.5652	45.8678	255.264	11708.4	0.226946	0.226946	0.107555	25185.8
							5.10109	1.94371	1.47186	0.594479	1.57078	29.2662	43.0756	22.1615	32.6186	15298.3		18.5203	23.6213	28.7224	19.4859	4.13546	1	1		19.0969	12.9747	25.2191	1027.96	1027.96		3.17401	45.5326	144.521	6580.4	0.156215	0.156215	0.145302	19122.9
							4.48747	2.60835	1.80418	0.583421	1.41097	17.789	32.0945	12.3045	22.1995	5567.33		15.5783	20.0658	24.5533	20.9392	0.873432	1	1		21.775	12.0692	31.4807	1193.64	1193.64		3.83912	46.0058	176.622	8125.64	0.146898	0.146898	0.0428222	6959.16
							5.28544	1.9816	1.4908	0.585858	1.46898	25.3102	37.7325	19.0414	28.3869	11930.1		16.8874	22.1728	27.4582	22.1924	0.0196044	1	1		28.3867	19.0412	37.7322	2257.13	2257.13		3.19046	44.478	141.905	6311.66	0.357613	0.357613	0.118136	14912.6
							4.52107	1.90347	1.45173	0.511495	1.65925	37.1802	53.9757	28.3565	41.1661	21739.1		18.0698	22.5909	27.1119	19.654	2.93681	1	1		31.2982	21.5592	41.0372	2779.46	2779.46		3.46603	42.2847	146.56	6197.26	0.448499	0.448499	0.219242	27173.9
							4.4701	2.67184	1.83592	0.803899	1.54095	14.0666	25.8252	9.66568	17.7454	3505.44		16.6601	21.1302	25.6003	20.9576	0.172651	1	1		17.7322	9.65846	25.8059	783.027	783.027		3.25385	44.3022	144.153	6386.27	0.122611	0.122611	0.0343064	4381.79
							5.55556	2.75231	1.87615	0.725658	1.61744	26.9035	50.4752	18.3392	34.4072	16156.1		15.6474	21.2029	26.7585	25.2681	4.06522	1	1		23.4514	12.4997	34.4031	1350.97	1350.97		4.22803	40.0734	169.432	6789.71	0.198974	0.198974	0.148718	20195.1
							5.58777	1.86445	1.43223	0.607649	1.57367	32.8372	47.0304	25.2248	36.1276	20825.4		17.073	22.6608	28.2486	25.1141	2.45334	1	1		32.4592	22.6634	42.2549	3008.52	3008.52		3.00416	45.1011	135.491	6110.78	0.49233	0.49233	0.212999	26031.8
							4.67911	2.14335	1.57167	0.686698	1.61814	22.3126	35.0682	16.3614	25.7148	8434.25		20.1913	24.8705	29.5496	21.6393	3.23113	1	1		18.5993	11.834	25.3645	942.994	942.994		3.74577	38.2058	143.11	5467.63	0.172468	0.172468	0.0964112	10542.8
							4.38888	1.72522	1.36261	0.569294	1.64325	28.6809	39.0808	22.6527	30.8667	12206.4		18.457	22.8459	27.2348	21.1892	1.65675	1	1		28.5831	20.9767	36.1894	2384.89	2384.89		2.2471	44.4931	99.9806	4448.45	0.536118	0.536118	0.171498	15258
							4.91958	2.27566	1.63783	0.780595	1.61229	19.4549	31.8638	14.002	22.9329	6895.5		20.1648	25.0843	30.0039	18.9555	6.12881	0	0		#NUM!	#NUM!	#NUM!	#NUM!			3.82008	47.8633	182.842	8751.41	#VALUE!		0.0492456	8619.38
							6.07148	2.56519	1.78259	0.598598	1.47313	30.3535	54.108	21.0932	37.6006	21769.5		18.2873	24.3588	30.4303	22.4082	1.95065	1	1		35.6071	19.9749	51.2394	3215.42	3215.42		2.83929	38.8649	110.348	4288.68	0.749747	0.749747	0.317252	27211.8
							4.83835	1.78187	1.39093	0.685563	1.59248	22.4623	31.2436	17.5341	24.3889	8327.07		19.6395	24.4779	29.3162	23.1862	1.29169	1	1		23.5037	16.8977	30.1096	1598.39	1598.39		2.62644	37.9381	99.6422	3780.23	0.422829	0.422829	0.137674	10408.8
							4.11085	2.10789	1.55395	0.58749	1.57454	21.3981	33.2515	15.7748	24.5131	6774.15		20.6815	24.7923	28.9032	25.9428	1.15049	1	1		23.5335	15.1444	31.9227	1518.8	1518.8		2.88664	43.831	126.524	5545.7	0.27387	0.27387	0.0763447	8467.69
							5.71703	2.35044	1.67522	0.624849	1.57998	33.0358	55.3424	23.5455	39.4439	23403.7		17.2253	22.9423	28.6594	23.5926	0.650308	1	1		39.1879	23.3927	54.9832	4040.72	4040.72		4.03863	44.4098	179.355	7965.11	0.507303	0.507303	0.183643	29254.7
							4.87521	2.65431	1.82716	0.622457	1.66134	30.5523	55.8238	21.0314	38.4276	17981.7		18.4112	23.2864	28.1616	25.4198	2.13339	1	1		34.5529	18.9108	50.1951	2982.09	2982.09		4.98762	48.7424	243.109	11849.7	0.251659	0.251659	0.0948424	22477.1
							5.24272	2.0012	1.5006	0.575074	1.57312	32.3541	48.5507	24.2607	36.4057	19400.2		18.3249	23.5676	28.8103	23.2991	0.268494	1	1		36.3579	24.2289	48.487	3690.7	3690.7		3.83577	46.4268	178.083	8267.81	0.446394	0.446394	0.146655	24250.2
							5.18388	2.14187	1.57094	0.692196	1.80999	38.2564	60.0983	28.0588	44.0785	27462.2		18.821	24.0049	29.1888	24.343	0.33805	1	1		43.9847	27.9991	59.9704	5275.09	5275.09		1.75386	44.2183	77.5526	3429.24			0.500516	34327.8
							4.48254	2.40669	1.70335	0.75347	1.6297	18.2868	31.1487	12.9426	22.0456	5677.21		15.9815	20.464	24.9465	23.2899	2.82587	1	1		17.1131	10.0467	24.1794	763.169	763.169		2.21892	47.3	104.955	4964.36	0.15373	0.15373	0.0714745	7096.51
							4.5582	1.72224	1.36112	0.697673	1.65994	22.5469	30.689	17.8192	24.2541	7830.96		18.6626	23.2208	27.779	22.836	0.384826	1	1		24.1675	17.7556	30.5795	1705.75	1705.75		3.49879	45.292	158.467	7177.31	0.237658	0.237658	0.0681919	9788.7
							4.16307	2.49095	1.74547	0.672279	1.49714	15.3295	26.7572	10.7418	18.7495	3759.07		16.0328	20.1958	24.3589	19.9689	0.226888	1	1		18.7216	10.7258	26.7175	900.275	900.275		4.01893	40.6212	163.254	6631.58	0.135756	0.135756	0.0354278	4698.84
							5.24843	2.41978	1.70989	0.67557	1.75633	36.6237	62.6225	25.8794	44.251	26721.7		18.2675	23.516	28.7644	23.7618	0.245885	1	1		44.2024	25.851	62.5537	5080.2	5080.2		2.44357	45.4037	110.947	5037.41			0.331541	33402.1
							5.43055	2.78158	1.89079	0.585247	1.56908	32.9678	62.3351	22.41	42.3726	23832.4		17.2832	22.7138	28.1443	19.6946	3.01923	1	1		35.2201	18.6272	51.8131	3032.06	3032.06		2.62885	43.6278	114.691	5003.7	0.605964	0.605964	0.297685	29790.5
							4.4014	2.28715	1.64358	0.71698	1.66079	20.363	33.4682	14.6331	24.0507	6771.91		16.9126	21.314	25.7154	18.3978	2.91618	1	1		18.0142	10.9604	25.0681	863.171	863.171		2.78732	39.8873	111.179	4434.61	0.194644	0.194644	0.0954413	8464.89
							4.53863	2.88046	1.94023	0.725907	1.4667	14.7082	28.5372	9.90717	19.2222	4031.21		16.3297	20.8683	25.407	21.1094	0.241013	1	1		19.1951	9.89319	28.4969	885.695	885.695		3.00526	36.9412	111.018	4101.15	0.215963	0.215963	0.0614342	5039.01
							4.05573	1.86223	1.43112	0.64238	1.72753	24.1268	34.5283	18.5413	26.5348	8157.08		20.5255	24.5812	28.637	22.7605	1.82072	1	1		23.7107	16.568	30.8534	1605.91	1605.91		3.53989	38.0599	134.728	5127.73	0.313182	0.313182	0.0994235	10196.3
							4.19069	2.05221	1.5261	0.750641	1.54406	14.2295	21.7156	10.5816	16.1486	3025.24		16.6306	20.8213	25.012	19.8269	0.994395	1	1		15.6874	10.2794	21.0954	681.249	681.249		4.02588	46.5153	187.265	8710.68	0.0782085	0.0782085	0.0217064	3781.55
							4.33009	2.12733	1.56366	0.589484	1.6462	26.647	41.6669	19.5865	30.6267	11101.9		19.4238	23.7539	28.084	25.8571	2.10319	1	1		26.7713	17.1209	36.4218	1959.02	1959.02		1.88514	42.3684	79.8704	3383.98	0.578908	0.578908	0.205044	13877.3
							3.92108	2.05846	1.52923	0.579269	1.57363	20.2742	31.0039	15.0617	23.0328	5752.34		20.3764	24.2975	28.2186	21.553	2.74451	1	1		16.4501	10.7571	22.1431	748.316	748.316		2.23116	42.3847	94.567	4008.19	0.186697	0.186697	0.0896967	7190.43
							4.12724	1.56434	1.28217	0.53408	1.49341	21.1946	27.1751	17.3716	22.2734	6120.98		19.0112	23.1385	27.2657	21.7612	1.37722	1	1		20.9967	16.3759	25.6175	1317.93	1317.93		3.35449	45.5495	152.795	6959.76	0.189365	0.189365	0.0549676	7651.22
							5.3673	1.81598	1.40799	0.593301	1.50829	27.7108	39.0165	21.4851	30.2508	14134.9		19.0631	24.4304	29.7977	25.956	1.52565	1	1		29.003	20.5988	37.4071	2420.73	2420.73		4.35616	40.1631	174.957	7026.82	0.344498	0.344498	0.125722	17668.6
							4.36773	2.06899	1.5345	0.548908	1.54707	24.7476	37.9751	18.3544	28.1648	9564.13		18.0211	22.3888	26.7566	24.0792	1.69042	1	1		25.9699	16.924	35.0157	1861.73	1861.73		3.52866	40.8961	144.308	5901.64	0.31546	0.31546	0.101287	11955.2
							3.91762	2.59443	1.79721	0.762445	1.64349	14.7304	26.4736	10.204	18.3388	3324.74		16.6795	20.5971	24.5148	19.7769	0.820277	1	1		17.9323	9.97786	25.8868	811.457	811.457		2.61454	45.6217	119.28	5441.73	0.149118	0.149118	0.0381857	4155.92
							3.94611	2.44373	1.72187	0.562717	1.66925	25.8217	44.4615	18.1941	31.3278	10028.4		17.4608	21.4069	25.353	23.9425	2.5356	1	1		24.0045	13.941	34.0681	1492.07	1492.07		2.36147	41.4862	97.9684	4064.34	0.367113	0.367113	0.154214	12535.6
							4.96114	1.92938	1.46469	0.627924	1.686	32.6197	47.7777	24.7633	36.2705	18440.2		16.9255	21.8866	26.8478	24.995	3.10835	1	1		28.2689	19.3003	37.2375	2257.84	2257.84		2.68108	41.8612	112.233	4698.23	0.480573	0.480573	0.245308	23050.2
							5.44817	2.21873	1.60936	0.676785	1.59569	27.8852	44.8775	20.2267	32.5521	15536.5		16.9227	22.3708	27.819	19.9939	2.37691	1	1		29.2907	18.2002	40.3813	2308.91	2308.91		3.20689	37.9219	121.611	4611.73	0.500659	0.500659	0.210557	19420.6
							4.26296	2.49146	1.74573	0.67862	1.63676	20.2428	35.3384	14.1839	24.7611	6712.79		17.4481	21.7111	25.9741	24.823	3.11194	1	1		16.9231	9.694	24.1522	735.544	735.544		3.25345	42.5502	138.435	5890.43	0.124871	0.124871	0.0712257	8390.99
							4.89145	2.07276	1.53638	0.814601	1.63193	18.6401	28.6383	13.8165	21.2274	6080.42		18.9961	23.8876	28.779	18.8036	5.08395	0	1		#NUM!	#NUM!	#NUM!	#NUM!			3.11462	39.3329	122.507	4818.56	#VALUE!		0.0788672	7600.52
							4.58985	2.56572	1.78286	0.581002	1.68083	32.2659	57.5257	22.4208	39.9732	18597.8		16.4122	21.002	25.5919	22.8957	1.89369	1	1		36.4124	20.4236	52.4013	3362.2	3362.2		2.49842	46.5858	116.391	5422.17	0.620085	0.620085	0.214372	23247.3
							5.00073	2.46706	1.73353	0.523156	1.55705	33.6155	58.2736	23.6206	40.9471	21624.5		18.5203	23.521	28.5218	17.7734	5.74764	0	0		#NUM!	#NUM!	#NUM!	#NUM!			1.79286	39.1331	70.16	2745.58	#VALUE!		0.492257	27030.6
							4.90425	2.90467	1.95233	0.615801	1.60689	28.0559	54.7746	18.8574	36.816	15914.2		15.4337	20.338	25.2422	19.3497	0.988239	1	1		36.0608	18.4706	53.651	3113.21	3113.21		2.66511	38.6605	103.034	3983.36	0.781554	0.781554	0.249698	19892.7
							5.06143	2.22848	1.61424	0.483529	1.80531	69.3663	111.974	50.2467	81.1103	89464		17.1662	22.2276	27.2891	20.9752	1.2524	1	1		78.5881	48.6842	108.492	16593.4	16593.4		4.04522	42.4018	171.525	7272.95			0.768807	111830
							4.09607	2.82866	1.91433	0.814504	1.51535	11.5606	22.1308	7.82379	14.9773	2228.08		17.3859	21.482	25.578	17.1028	4.37917	0	0		#NUM!	#NUM!	#NUM!	#NUM!			4.88026	38.965	190.159	7409.54	#VALUE!		0.018794	2785.1
							4.13473	2.39168	1.69584	0.628897	1.64432	22.1225	37.5161	15.6861	26.6011	7644.18		17.503	21.6378	25.7725	24.2121	2.57433	1	1		20.8162	12.2749	29.3575	1132.1	1132.1		2.94671	45.0376	132.713	5977.08	0.189408	0.189408	0.0799322	9555.23
							3.6923	1.62384	1.31192	0.667255	1.39691	10.9122	14.3159	8.81608	11.566	1464		21.4769	25.1692	28.8615	25.1486	0.0206348	1	1		11.5658	8.81594	14.3157	396.488	396.488		3.52695	43.939	154.97	6809.24	0.058228	0.058228	0.0134376	1830
							4.93114	1.87277	1.43638	0.63819	1.57481	25.028	35.9498	19.1961	27.573	10690.7		19.726	24.6571	29.5883	19.593	5.06414	0	1		#NUM!	#NUM!	#NUM!	#NUM!			2.76246	38.1347	105.346	4017.33	#VALUE!		0.166323	13363.4
							4.46485	2.5815	1.79075	0.731388	1.60802	18.3382	32.8391	12.7209	22.78	5859.59		20.4683	24.9332	29.398	23.4555	1.47771	1	1		21.4962	12.004	30.9884	1168.63	1168.63		3.05118	47.3308	144.415	6835.28	0.17097	0.17097	0.0535786	7324.49
							4.6938	1.99579	1.49789	0.600142	1.54419	23.954	35.8806	17.9781	26.9294	9512.16		20.5583	25.2522	29.946	24.1264	1.12571	1	1		26.1434	17.4535	34.8334	1909.97	1909.97		3.73402	39.6192	147.939	5861.24	0.325865	0.325865	0.101431	11890.2
							4.39491	2.30717	1.65359	0.709179	1.50458	15.5567	25.7244	11.1498	18.4371	3960.14		18.694	23.0889	27.4838	16.784	6.30491	0	0		#NUM!	#NUM!	#NUM!	#NUM!			2.53479	41.8474	106.074	4438.93	#VALUE!		0.0557586	4950.17
							4.32347	2.29303	1.64652	0.637373	1.57134	20.2522	33.3456	14.5421	23.9438	6586.41		18.4667	22.7901	27.1136	24.0326	1.24244	1	1		22.9339	13.9287	31.939	1397.6	1397.6		2.64303	38.3198	101.28	3881.05	0.360109	0.360109	0.106067	8233.01
							5.13411	2.15896	1.57948	0.556006	1.5688	32.6963	51.6432	23.9204	37.7818	19924.9		17.6413	22.7754	27.9095	22.8322	0.0567908	1	1		37.7795	23.9189	51.64	3880.41	3880.41		2.39203	42.7747	102.318	4376.64			0.284535	24906.1
							4.22599	2.2658	1.6329	0.680538	1.66644	20.9708	34.2432	15.1131	24.6781	6870.77		16.7289	20.9549	25.1809	25.1543	4.19934	1	1		2.76705	1.69456	3.83953	20.4402	20.4402		2.67058	43.991	117.482	5168.13	0.00395504	0.00395504	0.0830906	8588.47
							4.96375	2.11757	1.55878	0.631964	1.59587	26.8222	41.81	19.7443	30.7772	12873.1		18.015	22.9788	27.9425	25.0072	2.02845	1	1		28.09	18.0205	38.1595	2160.33	2160.33		4.01283	37.2276	149.388	5561.37	0.388452	0.388452	0.144671	16091.3
							5.4074	2.40511	1.70256	0.508946	1.42844	29.2434	49.7885	20.7011	35.2448	17509		17.6721	23.0795	28.4869	25.2702	2.19071	1	1		32.2229	18.9262	45.5195	2706.51	2706.51		2.53039	42.5129	107.574	4573.28	0.59181	0.59181	0.239284	21886.2
							4.02875	2.43994	1.71997	0.617152	1.54782	18.2443	31.3796	12.8608	22.1202	5107.82		18.8096	22.8384	26.8671	23.6724	0.834033	1	1		21.641	12.5822	30.6998	1213.51	1213.51		3.97942	46.8532	186.449	8735.72	0.138913	0.138913	0.0365441	6384.78
							4.07528	2.31696	1.65848	0.743429	1.61523	15.6144	25.8961	11.1768	18.5365	3705.61		18.5737	22.6489	26.7242	26.3179	3.66897	1	1		8.06845	4.86497	11.2719	172.278	172.278		4.49954	41.5198	186.82	7756.72	0.0222101	0.0222101	0.0298581	4632.02
							5.26082	2.40236	1.70118	0.659921	1.55805	25.3909	43.1946	17.98	30.5873	12835.8		17.2209	22.4817	27.7425	23.8455	1.36383	1	1		29.5416	17.3653	41.7178	2275.91	2275.91		3.00592	42.7108	128.385	5483.42	0.415053	0.415053	0.146302	16044.8
							4.37658	1.93651	1.46826	0.483395	1.55093	30.4778	44.7492	23.1081	33.9287	14217.9		18.7544	23.131	27.5076	24.0013	0.870241	1	1		33.2512	22.6467	43.8557	3120.19	3120.19		2.79052	37.6012	104.927	3945.37	0.790848	0.790848	0.22523	17772.4
							4.79699	2.23059	1.6153	0.578731	1.60811	29.9938	48.4489	21.7202	35.0846	15858.7		18.1538	22.9508	27.7478	22.8005	0.150357	1	1		35.0673	21.7095	48.4251	3302.71	3302.71		3.5325	45.2612	159.885	7236.6	0.45639	0.45639	0.136966	19823.3
							3.76634	2.45636	1.72818	0.749883	1.69886	15.516	26.8144	10.9163	18.8654	3463.49		16.8481	20.6144	24.3807	19.9429	0.671469	1	1		18.5631	10.7414	26.3848	890.361	890.361		3.2044	39.2943	125.915	4947.73	0.179953	0.179953	0.043751	4329.36
							4.67555	2.34004	1.67002	0.645842	1.52889	20.6252	34.4445	14.7196	24.582	7447.28		16.703	21.3785	26.0541	19.8904	1.48814	1	1		23.3037	13.9541	32.6532	1431.46	1431.46		4.99494	48.1106	240.309	11561.4	0.123813	0.123813	0.0402593	9309.09
							4.23626	2.00104	1.50052	0.741037	1.64744	17.6745	26.5209	13.2536	19.8872	4677.92		19.378	23.6143	27.8505	19.2698	4.34444	0	1		#NUM!	#NUM!	#NUM!	#NUM!			2.48276	46.2339	114.788	5307.09	#VALUE!		0.0550904	5847.4
							4.42589	2.2032	1.6016	0.542244	1.49975	23.3066	37.3279	16.9426	27.1352	8793.53		17.0053	21.4312	25.8571	24.4146	2.98338	1	1		20.0438	12.5149	27.5728	1084.07	1084.07		3.84017	43.6872	167.766	7329.24	0.14791	0.14791	0.0749867	10991.9
							4.94098	2.61205	1.80602	0.6309	1.61393	27.7087	50.0425	19.1584	34.6004	14882		18.1799	23.1208	28.0618	19.9377	3.18313	1	1		26.4635	14.6529	38.2741	1761.89	1761.89		3.45622	46.6154	161.113	7510.35	0.234595	0.234595	0.123845	18602.5
							5.22627	2.72399	1.86199	0.659715	1.58046	26.3374	49.0401	18.003	33.5216	14495.7		19.8973	25.1235	30.3498	21.8435	3.28001	1	1		26.0977	14.016	38.1794	1681.14	1681.14		4.2817	41.9056	179.427	7519.02	0.223585	0.223585	0.120492	18119.6
							4.97518	1.85902	1.42951	0.628967	1.70877	34.2599	48.9748	26.3445	37.6596	20166		18.8147	23.7899	28.765	26.6223	2.8324	1	1		30.9609	21.6585	40.2634	2739.6	2739.6		4.95507	41.9403	207.817	8715.88	0.314323	0.314323	0.144607	25207.5
							3.85057	1.77191	1.38595	0.589429	1.56715	18.9399	26.2498	14.8144	20.5321	4704.2		19.0227	22.8733	26.7238	19.7294	3.14383	1	1		11.8553	8.55391	15.1567	407.306	407.306		3.8244	46.24	176.84	8177.07	0.0498107	0.0498107	0.0359557	5880.24
							5.98291	2.49045	1.74522	0.743494	1.60248	28.2659	49.3302	19.8078	34.569	18365.9		17.5868	23.5697	29.5526	22.3285	1.2412	1	1		33.8169	19.3769	48.257	2937.61	2937.61		3.78125	43.0107	162.635	6995.03	0.419956	0.419956	0.164097	22957.3
							4.37621	2.39012	1.69506	0.476268	1.55473	31.4478	53.3059	22.3026	37.8042	16344.7		18.9116	23.2878	27.664	22.3461	0.941714	1	1		36.9186	21.7801	52.0571	3561.96	3561.96		3.76455	40.6026	152.851	6206.14	0.573941	0.573941	0.164602	20430.9
							4.64761	1.96382	1.48191	0.671715	1.49542	18.0392	26.7325	13.6125	20.1725	5313.2		18.4806	23.1282	27.7758	24.1914	1.06324	1	1		19.6375	13.2515	26.0236	1083.38	1083.38		1.99032	41.2028	82.0068	3378.91	0.32063	0.32063	0.0982788	6641.5
							4.62942	2.49401	1.747	0.586337	1.53786	23.9908	41.9119	16.8051	29.3585	10243.6		20.3055	24.9349	29.5643	26.6739	1.73897	1	1		27.2085	15.5744	38.8426	1900.51	1900.51		3.44573	40.4756	139.468	5645.04	0.336669	0.336669	0.113414	12804.5
							4.65817	1.8059	1.40295	0.683766	1.62867	22.7604	31.9317	17.6818	24.8068	8262.54		18.9325	23.5907	28.2488	24.2055	0.614847	1	1		24.5897	17.5271	31.6523	1742.87	1742.87		2.72156	42.8594	116.644	4999.3	0.348624	0.348624	0.103296	10328.2
							4.31417	2.38165	1.69082	0.62973	1.56191	20.2002	34.1549	14.3409	24.2479	6638.6		18.8571	23.1712	27.4854	24.7883	1.61707	1	1		22.4801	13.2954	31.6648	1322.6	1322.6		3.30497	41.2813	136.433	5632.14	0.23483	0.23483	0.0736686	8298.24
							4.9601	2.5291	1.76455	0.668431	1.50556	20.4406	36.0685	14.2614	25.1649	8015.47		15.8218	20.7819	25.742	18.7171	2.06473	1	1		22.881	12.967	32.7949	1335.97	1335.97		3.81635	45.2236	172.589	7805.08	0.171167	0.171167	0.0641848	10019.3
							4.61034	1.94302	1.47151	0.630968	1.54544	21.619	31.8126	16.3728	24.0927	7544.02		16.5802	21.1906	25.8009	22.1148	0.924238	1	1		23.6036	16.0404	31.1667	1570.57	1570.57		3.43146	45.9989	157.843	7260.61	0.216313	0.216313	0.0649396	9430.03
							4.75767	1.55452	1.27726	0.789427	1.66762	19.9931	25.5365	16.4272	20.9818	6270.02		18.8498	23.6075	28.3651	20.1131	3.49437	1	1		14.2391	11.1482	17.3301	606.951	606.951		2.96976	41.3709	122.862	5082.9	0.11941	0.11941	0.077097	7837.53
							4.26079	2.23273	1.61636	0.702361	1.63499	19.0583	30.8052	13.7971	22.3011	5689.21		18.7896	23.0504	27.3111	21.4393	1.61106	1	1		20.6455	12.7728	28.5182	1144.35	1144.35		2.78686	37.7263	105.138	3966.46	0.288506	0.288506	0.0896456	7111.51
							3.90706	1.87509	1.43755	0.702068	1.76787	20.7919	29.8893	15.9402	22.9148	5848.03		18.1404	22.0474	25.9545	25.6379	3.59047	1	1		9.0359	6.28564	11.7862	232.74	232.74		3.1217	39.0472	121.894	4759.61	0.0488991	0.0488991	0.0767924	7310.04
							4.56328	2.79005	1.89503	0.55062	1.30262	15.7167	29.7836	10.6749	20.2293	4557.95		17.2121	21.7754	26.3386	21.3771	0.398259	1	1		20.1521	10.6342	29.67	991.224	991.224		3.69346	43.0114	158.861	6832.83	0.145068	0.145068	0.0416916	5697.44
							5.41159	2.24631	1.62316	0.751414	1.54052	20.937	33.9841	15.1288	24.5565	8740.89		19.0699	24.4815	29.8931	20.2146	4.26686	1	1		15.1041	9.30538	20.9028	611.065	611.065		4.74845	41.4302	196.729	8150.54	0.0749724	0.0749724	0.0670269	10926.1
							5.24517	1.87638	1.43819	0.574131	1.65636	39.0252	56.1257	29.9117	43.0187	27663.8		17.2648	22.5099	27.7551	19.1737	3.33628	1	1		33.1947	23.0809	43.3085	3140.33	3140.33		3.58179	48.9003	175.151	8564.93	0.36665	0.36665	0.201868	34579.8
							4.59429	2.96184	1.98092	0.677854	1.56698	20.0579	39.7332	13.415	26.5741	7693.3		16.6424	21.2367	25.831	21.4507	0.213964	1	1		26.5453	13.4005	39.69	1670.9	1670.9		2.12907	40.9497	87.1849	3570.19	0.468015	0.468015	0.134679	9616.62
							4.33404	2.03006	1.51503	0.555815	1.57932	25.6269	38.8255	19.1253	28.9754	10110.4		17.5993	21.9333	26.2673	24.9766	3.04329	1	1		20.6303	13.6171	27.6436	1182.58	1182.58		2.66569	47.3387	126.19	5973.69	0.197964	0.197964	0.10578	12638
							3.96174	2.66171	1.83085	0.778453	1.57833	13.0418	23.8775	8.97076	16.4242	2665.97		19.4963	23.4581	27.4198	20.3673	3.09071	1	1		10.275	5.61215	14.9379	263.371	263.371		3.09269	45.2991	140.096	6346.22	0.0415005	0.0415005	0.0262555	3332.46
							5.42175	1.83736	1.41868	0.554165	1.45072	27.349	38.7996	21.117	29.9583	13955.6		16.1916	21.6134	27.0351	21.7499	0.136527	1	1		29.9488	21.1103	38.7873	2572.37	2572.37		3.52904	46.1743	162.951	7524.15	0.341881	0.341881	0.115923	17444.5
							5.02089	2.74706	1.87353	0.585503	1.67304	36.4224	68.2385	24.8406	46.5395	26737.6		19.6742	24.6951	29.716	22.4615	2.23355	1	1		41.681	22.2473	61.1147	4271.43	4271.43		2.44699	44.4298	108.72	4830.39			0.345955	33422
							4.7459	2.81348	1.90674	0.51861	1.61089	35.3865	67.4729	23.982	45.7275	24125.9		19.3674	24.1133	28.8592	23.5314	0.581927	1	1		45.3824	23.801	66.9638	5007.09	5007.09		2.2855	46.9803	107.374	5044.44			0.298917	30157.4
							5.73494	2.20095	1.60048	0.627869	1.7077	43.7039	69.9471	31.7803	50.8637	40050.4		18.4741	24.209	29.944	20.6451	3.56393	1	1		39.8497	24.8987	54.8008	4286.6	4286.6		2.67679	45.8016	122.601	5615.34	0.763373	0.763373	0.44577	50063
							4.28907	1.81447	1.40724	0.724401	1.81236	25.1096	35.3351	19.474	27.4045	9272.03		18.5277	22.8167	27.1058	21.9501	0.866635	1	1		26.8393	19.0724	34.6062	2073.52	2073.52		2.23554	44.5269	99.5417	4432.28	0.467823	0.467823	0.130746	11590
							5.49582	1.62403	1.31202	0.621484	1.61769	33.9869	44.5913	27.4572	36.0243	21139.2		18.7994	24.2952	29.791	23.5113	0.783934	1	1		35.6559	27.1764	44.1353	3768.16	3768.16		5.30265	43.8938	232.753	10216.4	0.368833	0.368833	0.129321	26424
							4.71831	1.89821	1.4491	0.784995	1.72211	21.9475	31.8041	16.7548	24.2795	7898.78		19.9538	24.6721	29.3905	23.1127	1.55945	1	1		22.915	15.8132	30.0168	1491.2	1491.2		4.77734	40.8383	195.098	7967.49	0.18716	0.18716	0.061961	9873.47
							4.8368	2.34547	1.67274	0.594866	1.52489	24.4268	40.8595	17.4206	29.1401	10816		16.4892	21.326	26.1628	17.5575	3.76848	1	1		18.267	10.9204	25.6135	878.735	878.735		4.58284	36.956	169.364	6259	0.140395	0.140395	0.108004	13520
							4.57294	2.00831	1.50416	0.704212	1.75499	26.6633	40.1057	19.9699	30.0378	11506.1		16.312	20.885	25.4579	23.5864	2.70141	1	1		24.2364	16.1129	32.3598	1638.06	1638.06		5.13028	42.1569	216.277	9117.56	0.17966	0.17966	0.078873	14382.6
							5.21202	2.13088	1.56544	0.633223	1.80873	45.2693	70.8665	33.2569	52.0617	38590.3		21.1077	26.3197	31.5317	19.2168	7.10292	0	0		#NUM!	#NUM!	#NUM!	#NUM!			4.4901	39.9304	179.291	7159.16	#VALUE!		0.336896	48237.9
							5.01379	1.77743	1.38871	0.481133	1.63704	46.3816	64.4108	36.2382	50.3245	36765.5		20.5332	25.547	30.5608	25.0684	0.47859	1	1		50.0947	36.0727	64.1167	7266.07	7266.07		3.74291	41.1657	154.08	6342.8			0.362276	45956.9
							3.97056	2.05379	1.52689	0.669585	1.41471	12.406	18.9426	9.22328	14.083	2179.35		16.421	20.3915	24.3621	20.3296	0.0619385	1	1		14.0812	9.22216	18.9403	548.744	548.744		2.63992	39.214	103.522	4059.52	0.135175	0.135175	0.0335531	2724.19
							6.12108	2.17639	1.5882	0.792511	1.77956	38.0135	60.3729	27.7399	44.0564	32205.1		17.5987	23.7198	29.8409	21.9643	1.75553	1	1		42.2056	26.5745	57.8367	4828.57	4828.57		2.52226	45.0771	113.696	5125.09			0.392739	40256.4
							4.03288	2.02586	1.51293	0.484149	1.54117	26.2335	39.6895	19.5914	29.6404	9851.6		19.1494	23.1823	27.2151	24.1039	0.921616	1	1		28.8561	19.073	38.6392	2315.25	2315.25		4.01043	41.0744	164.726	6766.03	0.342187	0.342187	0.0910024	12314.5
							4.9526	2.71489	1.85745	0.706135	1.46323	17.2909	32.1169	11.8299	21.9734	5911.5		18.2916	23.2442	28.1968	21.8617	1.38252	1	1		21.0999	11.3596	30.8402	1100.6	1100.6		3.86505	44.3742	171.508	7610.55	0.144615	0.144615	0.0485469	7389.37
							6.07282	2.07657	1.53828	0.520225	1.5548	45.6336	70.1975	33.8046	52.001	45272.8		19.0415	25.1143	31.1871	24.2518	0.862526	1	1		51.4738	33.4619	69.4858	7304.6	7304.6		3.85539	43.3766	167.234	7254.05			0.390065	56590.9
							4.91638	2.62527	1.81264	0.666051	1.61839	25.4088	46.0569	17.5437	31.8003	12479.9		17.6796	22.596	27.5124	20.9883	1.60768	1	1		30.052	16.5792	43.5248	2266.99	2266.99		1.84025	41.7322	76.7978	3204.94	0.707342	0.707342	0.243372	15599.9
							4.57794	1.76788	1.38394	0.556508	1.44117	20.8429	28.8452	16.3163	22.5808	6768.87		20.4212	24.9992	29.5771	21.5003	3.49888	1	1		14.5617	10.5219	18.6015	614.884	614.884		2.77547	41.0455	113.92	4675.92	0.1315	0.1315	0.0904751	8461.09
							4.01908	2.14208	1.57104	0.675935	1.6467	18.8326	29.5868	13.8122	21.6995	5159.83		18.2424	22.2615	26.2806	17.3485	4.91302	0	0		#NUM!	#NUM!	#NUM!	#NUM!			2.36115	44.2141	104.396	4615.79	#VALUE!		0.0698665	6449.79
							5.10144	2.42871	1.71436	0.70666	1.60621	23.9277	41.0205	16.8898	28.9552	11103.7		16.3677	21.4692	26.5706	21.4936	0.0244718	1	1		28.9549	16.8896	41.0201	2176.54	2176.54		1.70723	47.2761	80.7112	3815.71	0.570416	0.570416	0.181876	13879.7
							5.09346	1.9391	1.46955	0.619462	1.71429	37.0316	54.4198	28.0644	41.2421	24438.6		17.6744	22.7679	27.8614	24.8912	2.12329	1	1		37.4878	25.5097	49.4658	3964.24	3964.24		4.96966	44.0707	219.016	9652.2	0.410709	0.410709	0.158245	30548.2
							5.28655	2.76163	1.88081	0.669338	1.5199	23.1288	43.5009	15.7519	29.6264	11380.3		16.6752	21.9618	27.2483	20.7581	1.20366	1	1		28.8483	15.3382	42.3584	2041.1	2041.1		3.11181	44.222	137.61	6085.41	0.335408	0.335408	0.116881	14225.4
							4.94138	1.97624	1.48812	0.738752	1.63338	22.29	33.1702	16.7845	24.9773	8642.79		17.7446	22.686	27.6274	22.513	0.172952	1	1		24.962	16.7742	33.1499	1746.92	1746.92		3.07328	39.2824	120.726	4742.39	0.368363	0.368363	0.113903	10803.5
							4.59349	2.23896	1.61948	0.538019	1.46651	23.218	37.6012	16.794	27.1976	9112.72		17.6068	22.2003	26.7938	18.0476	4.15272	1	1		11.6253	7.1784	16.0722	362.454	362.454		4.17817	47.1962	197.194	9306.79	0.0389451	0.0389451	0.0611967	11390.9
							5.15805	2.06665	1.53333	0.560828	1.64928	38.8454	59.5626	28.8208	44.1917	27817.4		17.1126	22.2706	27.4287	26.1156	3.84498	1	1		29.4574	19.2114	39.7033	2396.27	2396.27		3.22283	44.9073	144.728	6499.36	0.368693	0.368693	0.267501	34771.7
							5.00297	2.12701	1.5635	0.677818	1.4875	19.558	30.579	14.3765	22.4778	6909.63		18.3551	23.358	28.361	22.587	0.77107	1	1		22.2092	14.2048	30.2136	1348.3	1348.3		2.86489	44.7393	128.173	5734.37	0.235126	0.235126	0.0753094	8637.04
							4.77039	1.65904	1.32952	0.610478	1.64853	29.6447	39.4133	23.7566	31.585	14032.4		17.1916	21.9619	26.7323	24.1364	2.17445	1	1		28.1128	21.1451	35.0806	2330.38	2330.38		2.89181	43.4516	125.654	5459.87	0.42682	0.42682	0.160631	17540.5
							4.48878	1.75109	1.37554	0.506203	1.57328	30.9857	42.6222	24.3404	33.4813	14629.9		17.6772	22.166	26.6547	24.3574	2.1915	1	1		29.2199	21.2424	37.1974	2482.37	2482.37		3.32412	44.5104	147.958	6585.67	0.376935	0.376935	0.138843	18287.4
							4.90464	1.82358	1.41179	0.641578	1.56057	23.9078	33.7528	18.5091	26.1309	9626.12		18.1998	23.1045	28.0091	18.9815	4.12298	1	1		14.1528	10.0247	18.2809	575.733	575.733		2.63867	41.032	108.27	4442.53	0.129596	0.129596	0.135426	12032.7
							4.23406	2.13566	1.56783	0.626848	1.45119	15.992	25.0728	11.7401	18.4065	3915.45		18.3504	22.5844	26.8185	21.0757	1.50871	1	1		17.1983	10.9695	23.4271	807.335	807.335		4.41722	43.0041	189.958	8168.99	0.0988292	0.0988292	0.0299566	4894.31
							4.81579	2.38435	1.69218	0.669477	1.60488	23.7287	40.1532	16.8403	28.4968	10230.3		18.5672	23.383	28.1988	26.0025	2.61952	1	1		23.9123	14.1311	33.6935	1495.79	1495.79		2.04994	41.2093	84.4768	3481.23	0.429673	0.429673	0.183669	12787.9
							4.1184	1.86268	1.43134	0.587923	1.60633	22.8037	32.6398	17.523	25.0814	7400.06		19.4556	23.574	27.6924	18.4247	5.1493	0	0		#NUM!	#NUM!	#NUM!	#NUM!			5.66589	42.2617	239.45	10119.6	#VALUE!		0.0457038	9250.07
							4.76371	1.93825	1.46912	0.698058	1.65939	24.2113	35.5694	18.3513	26.9603	9768.73		19.3475	24.1112	28.8749	20.8823	3.22893	1	1		19.822	13.4924	26.1516	1108.51	1108.51		2.63638	41.8697	110.384	4621.75	0.239845	0.239845	0.132103	12210.9
							5.88865	2.00559	1.5028	0.682108	1.55928	28.8232	43.3154	21.5973	32.4563	17306.4		16.8611	22.7497	28.6384	17.3307	5.41904	1	1		12.7011	8.45164	16.9505	450.064	450.064		2.1175	40.6516	86.0796	3499.27	0.128616	0.128616	0.309108	21633
							4.11073	2.11977	1.55989	0.781873	1.7865	19.3945	30.2532	14.2719	22.2626	5575.99		17.2812	21.3919	25.5027	20.469	0.922971	1	1		21.6941	13.9075	29.4808	1288.07	1288.07		4.31585	43.2109	186.492	8058.49	0.15984	0.15984	0.0432462	6969.99
							3.81562	1.62353	1.31176	0.711843	1.41583	10.7745	14.1336	8.70548	11.4195	1474.89		15.991	19.8067	23.6223	17.9917	1.81492	1	1		10.045	7.65762	12.4324	299.087	299.087		3.90328	45.2602	176.663	7995.81	0.0374054	0.0374054	0.0115286	1843.62
							4.29503	1.73782	1.36891	0.746725	1.59708	16.3483	22.3794	12.8779	17.6286	3888.74		16.6358	20.9308	25.2259	20.3624	0.56839	1	1		17.4736	12.7646	22.1826	889.546	889.546		3.50854	45.2537	158.774	7185.12	0.123804	0.123804	0.0338263	4860.92
							4.0942	1.78829	1.39415	0.723348	1.67257	18.1613	25.3195	14.1584	19.739	4610.94		17.362	21.4562	25.5504	24.0583	2.60207	1	1		15.2396	10.9312	19.5481	671.306	671.306		3.89277	45.5487	177.311	8076.28	0.0831208	0.0831208	0.0356827	5763.67
							4.88157	2.34156	1.67078	0.619633	1.55066	24.5498	41.0173	17.5171	29.2672	11018.9		19.5963	24.4779	29.3594	20.4918	3.98605	1	1		16.8952	10.1122	23.6782	752.216	752.216		4.64382	35.8244	166.362	5959.82	0.126215	0.126215	0.115554	13773.7
							4.69218	1.89618	1.44809	0.524057	1.49969	26.7732	38.77	20.4464	29.6082	11685.2		16.5783	21.2705	25.9627	22.3886	1.11816	1	1		28.7552	19.8574	37.6531	2348.94	2348.94		2.64117	40.8905	107.999	4416.13	0.531901	0.531901	0.165377	14606.5
							3.87317	2.53297	1.76648	0.632329	1.53693	16.2089	28.6327	11.304	19.9684	3938.33		18.6808	22.554	26.4271	20.1714	2.38258	1	1		15.7433	8.91221	22.5743	632.049	632.049		2.92012	46.1492	134.761	6219.12	0.10163	0.10163	0.0395788	4922.91
							5.27351	1.79442	1.39721	0.615272	1.30135	16.3758	22.8804	12.7509	17.8157	4833.42		18.5229	23.7964	29.0699	23.7798	0.0166319	1	1		17.8156	12.7508	22.8803	916.537	916.537		3.7253	43.685	162.74	7109.31	0.128921	0.128921	0.042492	6041.77
							4.55269	2.5472	1.7736	0.557543	1.66297	32.8556	58.2726	22.8772	40.5749	19067.1		17.2555	21.8082	26.3609	25.0894	3.28122	1	1		28.1275	15.859	40.396	2012.63	2012.63		2.11034	48.9303	103.26	5052.52	0.398343	0.398343	0.235861	23833.9
							4.54784	1.95138	1.47569	0.671207	1.64578	23.3111	34.4	17.6285	26.0143	8664.23		16.7527	21.3006	25.8484	20.1231	1.17744	1	1		25.1273	17.0275	33.2271	1777.43	1777.43		3.19422	41.1586	131.47	5411.1	0.328478	0.328478	0.100075	10830.3
							4.52969	1.85138	1.42569	0.528679	1.58899	30.3618	43.2865	23.3807	33.3336	14402.2		17.6527	22.1823	26.712	20.8367	1.34567	1	1		31.8287	22.3252	41.3323	2898.9	2898.9		2.86203	41.2054	117.931	4859.41	0.596554	0.596554	0.185236	18002.7
							4.27627	2.06583	1.53291	0.636376	1.60669	21.345	32.72	15.8387	24.2793	6962.2		16.9947	21.2709	25.5472	24.814	3.54303	1	1		13.5949	8.86869	18.3212	510.461	510.461		1.90638	41.2931	78.7202	3250.6	0.157036	0.157036	0.133864	8702.75
							5.29175	2.44666	1.72333	0.624298	1.50696	25.048	43.1661	17.6428	30.4044	12660.7		20.5278	25.8195	31.1113	23.4507	2.36886	1	1		27.1879	15.7764	38.5994	1913.1	1913.1		3.14539	43.5616	137.018	5968.72	0.320521	0.320521	0.132574	15825.9
							4.36239	2.3315	1.66575	0.459923	1.56947	34.1536	56.8914	24.4012	40.6463	19025.3		19.887	24.2494	28.6118	22.6957	1.55367	1	1		37.9811	22.8012	53.161	3808.02	3808.02		3.55511	42.5245	151.179	6428.83	0.592336	0.592336	0.184961	23781.6
							4.87251	1.76172	1.38086	0.674704	1.6072	23.9888	33.1252	18.8027	25.9639	9534.14		18.0566	22.9291	27.8016	23.2484	0.319236	1	1		25.9082	18.7623	33.054	1948.32	1948.32		2.32408	42.8561	99.601	4268.51	0.456441	0.456441	0.1396	11917.7
							3.90794	2.42609	1.71304	0.592924	1.48305	16.3886	28.0744	11.5719	19.8232	3988.53		18.8676	22.7755	26.6834	21.3639	1.41163	1	1		18.4847	10.7906	26.1788	887.451	887.451		3.58609	43.537	156.127	6797.32	0.130559	0.130559	0.0366737	4985.66
							4.51551	2.12468	1.56234	0.605179	1.6612	28.1795	44.026	20.7212	32.3736	12941.4		18.7503	23.2658	27.7813	24.9827	1.71687	1	1		29.9423	19.165	40.7195	2451.67	2451.67		3.02437	41.6487	125.961	5246.1	0.467331	0.467331	0.154179	16176.8
							5.31143	2.12486	1.56243	0.679788	1.55358	24.3835	38.0975	17.9294	28.0134	11397.9		20.4422	25.7536	31.0651	18.8231	6.93057	0	0		#NUM!	#NUM!	#NUM!	#NUM!			4.22775	43.6822	184.678	8067.12	#VALUE!		0.0883051	14247.4
							5.06713	2.0789	1.53945	0.778488	1.34743	12.4781	19.2094	9.24018	14.2248	2825.57		19.3857	24.4529	29.52	25.5191	1.06621	1	1		13.9063	9.03331	18.7794	532.939	532.939		3.38092	43.8596	148.286	6503.76	0.0819433	0.0819433	0.0271533	3531.97
							6.05868	2.31199	1.656	0.645896	1.54225	31.5791	52.2948	22.6189	37.4569	22514.3		19.2397	25.2984	31.3571	20.341	4.9574	1	1		21.5336	13.0034	30.0638	1228.15	1228.15		2.1104	38.8405	81.9692	3183.73	0.385758	0.385758	0.441981	28142.9
							5.09622	2.08722	1.54361	0.649546	1.57506	25.6512	39.5955	18.9705	29.283	12026		17.3651	22.4613	27.5576	21.0218	1.43957	1	1		28.0904	18.1979	37.9829	2171.49	2171.49		2.38346	42.0992	100.342	4224.3	0.514047	0.514047	0.177929	15032.5
							4.07153	1.79386	1.39693	0.716686	1.53738	14.4492	20.1845	11.252	15.7183	2905.07		17.3737	21.4453	25.5168	24.9185	3.47328	1	1		8.20186	5.87136	10.5324	194.274	194.274		2.53608	45.9538	116.543	5355.57	0.0362751	0.0362751	0.0339025	3631.34
							5.23718	2.34468	1.67234	0.717638	1.48405	19.0996	31.941	13.6228	22.7819	7159.14		15.6879	20.925	26.1622	22.3667	1.4417	1	1		21.9017	13.0964	30.7069	1263.39	1263.39		4.10998	44.3809	182.404	8095.26	0.156066	0.156066	0.0552726	8948.92
							4.24142	1.66919	1.3346	0.759307	1.64435	16.9233	22.5858	13.531	18.0584	4072.16		15.5401	19.7816	24.023	16.6823	3.09927	1	1		12.3281	9.23734	15.4189	447.456	447.456		2.88605	43.2829	124.917	5406.75	0.0827586	0.0827586	0.0470726	5090.2
							5.69243	2.11819	1.55909	0.514088	1.71871	62.3418	97.1968	45.8867	71.5418	79760.3		17.0194	22.7118	28.4042	22.7585	0.0467285	1	1		71.5393	45.8852	97.1935	14010.7	14010.7		3.69519	47.0738	173.947	8188.33			0.608795	99700.3
							5.01845	2.21264	1.60632	0.700371	1.49768	19.0932	30.6699	13.8612	22.2655	6702.43		18.8347	23.8531	28.8716	23.8412	0.0119017	1	1		22.2655	13.8612	30.6698	1335.55	1335.55		3.95926	49.4058	195.61	9664.28	0.138195	0.138195	0.0433454	8378.04
							4.26552	2.52136	1.76068	0.714574	1.61591	17.94	31.5867	12.5276	22.0572	5302.68		18.0819	22.3474	26.613	25.9669	3.61942	1	1		11.6715	6.62898	16.714	348.079	348.079		2.07508	47.6513	98.8805	4711.79	0.0738741	0.0738741	0.0703379	6628.35
							4.98321	2.03194	1.51597	0.665698	1.66124	28.3341	42.9536	21.1392	32.0464	14215		19.8468	24.83	29.8132	21.9354	2.89463	1	1		26.0855	17.2072	34.9639	1890.08	1890.08		3.60215	48.1849	173.569	8363.43	0.225993	0.225993	0.106229	17768.8
							4.5616	1.96656	1.48328	0.749049	1.66546	20.2642	30.0575	15.2843	22.6709	6583.63		19.6053	24.1669	28.7285	22.99	1.17686	1	1		21.9034	14.7669	29.0399	1347.21	1347.21		2.61133	41.8949	109.401	4583.36	0.293934	0.293934	0.0897762	8229.54
							4.48311	2.21677	1.60839	0.7121	1.69803	22.7401	36.5748	16.4992	26.537	8499.12		19.3539	23.837	28.3201	25.521	1.684	1	1		24.5937	15.2909	33.8964	1628.31	1628.31		3.09796	44.8282	138.876	6225.57	0.261552	0.261552	0.0853246	10623.9
							5.6046	1.94588	1.47294	0.747192	1.77253	35.5764	52.4019	26.9297	39.6658	24846.9		17.9862	23.5908	29.1954	20.8844	2.70637	1	1		34.7347	23.5819	45.8875	3399.56	3399.56		3.12691	41.8499	130.861	5476.52	0.620752	0.620752	0.283562	31058.6
							4.58527	1.78096	1.39048	0.508548	1.68933	41.0547	57.0857	32.0534	44.5696	26358.2		19.9845	24.5697	29.155	19.3471	5.22262	0	0		#NUM!	#NUM!	#NUM!	#NUM!			3.32376	47.9895	159.506	7654.6	#VALUE!		0.215215	32947.8
							4.00436	1.90138	1.45069	0.648713	1.56007	17.1081	24.8185	13.0529	18.9357	4075.36		17.8524	21.8567	25.8611	19.995	1.86175	1	1		16.7647	11.5564	21.973	797.738	797.738		4.42631	37.0091	163.814	6062.6	0.131583	0.131583	0.0420133	5094.2
							4.47958	1.65482	1.32741	0.653059	1.63983	23.5162	31.2157	18.8634	25.0395	8286.69		17.3897	21.8692	26.3488	17.0447	4.82452	0	0		#NUM!	#NUM!	#NUM!	#NUM!			4.04342	45.2719	183.053	8287.17	#VALUE!		0.0624963	10358.4
							5.19088	2.07257	1.53629	0.686693	1.67859	29.827	45.8228	22.1092	33.966	16521.3		16.9386	22.1294	27.3203	22.902	0.772512	1	1		33.5878	21.863	45.3126	3112.27	3112.27		3.65481	45.9258	167.85	7708.65	0.403738	0.403738	0.133951	20651.7
							4.66813	2.52112	1.76056	0.641943	1.6596	26.9148	47.385	18.7952	33.0901	13061.1		17.6479	22.3161	26.9842	22.8286	0.512545	1	1		32.8901	18.6816	47.0985	2764.21	2764.21		4.58913	44.9946	206.486	9290.74	0.297523	0.297523	0.087864	16326.4
							4.80279	2.26717	1.63359	0.670318	1.54122	20.8004	33.9792	14.9875	24.4833	7683.96		18.8893	23.6921	28.4949	23.3832	0.30888	1	1		24.4326	14.9565	33.9088	1593.28	1593.28		3.19323	47.6884	152.28	7261.98	0.2194	0.2194	0.0661317	9604.95
							4.46867	2.38846	1.69423	0.636873	1.49542	18.4211	31.2096	13.0668	22.1382	5725.14		19.1217	23.5903	28.059	25.0254	1.4351	1	1		20.9655	12.3747	29.5564	1149.04	1149.04		4.9978	47.752	238.655	11396.3	0.100826	0.100826	0.0313981	7156.43
							5.03383	1.54219	1.27109	0.576927	1.35373	18.774	23.8635	15.4738	19.6687	5839.56		19.9915	25.0253	30.0591	23.8583	1.16699	1	1		19.1328	15.0523	23.2134	1097.72	1097.72		4.54363	45.8644	208.391	9557.74	0.114851	0.114851	0.0381861	7299.46
							5.42873	1.96473	1.48237	0.752563	1.62707	24.9044	36.9174	18.79	27.8537	11830.6		19.5309	24.9597	30.3884	20.4054	4.55424	1	1		15.1598	10.2268	20.0929	645.55	645.55		4.29854	46.5624	200.15	9319.47	0.069269	0.069269	0.0793407	14788.3
							3.68905	2.2204	1.6102	0.67705	1.47418	12.174	19.6026	8.82838	14.2155	2005.67		18.9404	22.6294	26.3185	21.3114	1.31797	1	1		13.2773	8.24574	18.3088	474.286	474.286		3.60553	47.5336	171.384	8146.47	0.0582198	0.0582198	0.0153875	2507.08
							4.38593	2.82843	1.91422	0.728183	1.45369	13.6025	26.0382	9.20587	17.622	3302.84		17.4246	21.8105	26.1964	20.8835	0.926971	1	1		17.224	8.99792	25.45	719.415	719.415		2.67355	40.4749	108.212	4379.86	0.164255	0.164255	0.0471311	4128.55
							3.99226	2.26677	1.63338	0.617492	1.64321	21.4768	35.0798	15.4757	25.2777	6808.88		17.1403	21.1325	25.1248	22.0027	0.870169	1	1		24.67	15.1036	34.2364	1624.49	1624.49		3.11449	41.408	128.965	5340.17	0.304202	0.304202	0.0796894	8511.1
							5.17096	2.48026	1.74013	0.68432	1.64251	27.7099	48.2189	19.441	33.8299	15228.5		19.109	24.2799	29.4509	18.0739	6.20601	0	0		#NUM!	#NUM!	#NUM!	#NUM!			2.61103	45.7096	119.349	5455.41	#VALUE!		0.174466	19035.6
							4.77949	1.82586	1.41293	0.725962	1.49354	16.6884	23.5795	12.9142	18.2469	4572.3		18.1484	22.9279	27.7074	22.2317	0.696202	1	1		18.0523	12.7765	23.328	936.353	936.353		2.77188	43.3357	120.121	5205.53	0.179876	0.179876	0.0548971	5715.37
							4.78544	1.62755	1.31377	0.440473	1.66766	53.42	70.1819	43.1212	56.6515	45497.5		17.911	22.6964	27.4819	26.1664	3.47001	1	1		39.0116	29.6943	48.3289	4508.48	4508.48		3.55849	41.056	146.097	5998.18	0.751642	0.751642	0.474076	56871.9
							5.00909	2.1551	1.57755	0.637921	1.69097	32.6143	51.4507	23.8739	37.6623	19329.6		18.7326	23.7417	28.7508	21.6222	2.11952	1	1		34.1246	21.6313	46.6178	3168	3168		4.48367	45.8992	205.797	9445.91	0.335383	0.335383	0.127897	24162
							4.17716	1.87177	1.43588	0.63961	1.58491	19.5727	28.1042	15.0148	21.5595	5537.59		17.59	21.7672	25.9443	19.7524	2.01478	1	1		18.8858	13.1528	24.6189	1017.27	1017.27		3.10008	45.3856	140.699	6385.7	0.159304	0.159304	0.0541991	6921.98
							5.07412	1.65387	1.32694	0.641734	1.43965	19.6252	26.0414	15.7457	20.8935	6536.36		16.589	21.6632	26.7373	23.0513	1.38811	1	1		20.0965	15.145	25.048	1191.77	1191.77		2.43222	38.2593	93.0548	3560.21	0.334748	0.334748	0.114747	8170.46
							5.34521	2.01861	1.5093	0.644596	1.69391	35.988	54.3168	26.908	40.6124	24543.2		16.0867	21.4319	26.7771	21.6233	0.191435	1	1		40.5864	26.8908	54.2819	4585.73	4585.73		4.27992	42.0199	179.842	7556.92	0.606825	0.606825	0.202986	30679
							4.94616	1.86566	1.43283	0.625931	1.48568	21.5652	30.8993	16.5621	23.7307	7952.11		17.8502	22.7964	27.7425	19.9367	2.85966	1	1		19.3625	13.5135	25.2115	1070.32	1070.32		5.33407	41.103	219.246	9011.67	0.118771	0.118771	0.0551515	9940.13
							4.68431	2.07044	1.53522	0.575602	1.69547	34.9758	53.6955	25.9344	39.815	20493.2		16.863	21.5473	26.2316	19.7511	1.79624	1	1		36.7714	23.9519	49.591	3731.57	3731.57		3.8855	42.7392	166.063	7097.39	0.525767	0.525767	0.180464	25616.5
							4.28193	1.91217	1.45609	0.629311	1.56627	20.1535	29.3452	15.3466	22.3459	6058.13		18.0595	22.3414	26.6233	20.0196	2.32183	1	1		18.7756	12.8946	24.6566	998.824	998.824		2.11269	41.7613	88.2286	3684.54	0.271086	0.271086	0.102763	7572.66
							5.87288	1.76512	1.38256	0.490885	1.79462	85.9746	118.865	67.3411	93.103	147684		17.3484	23.2213	29.0941	24.211	0.989738	1	1		91.7713	66.3779	117.165	24432.6	24432.6		2.72474	42.9015	116.895	5014.98			1.84054	184606
							4.69055	1.95898	1.47949	0.72236	1.60814	20.2564	29.9692	15.2983	22.6337	6756.04		18.9561	23.6467	28.3372	22.7506	0.896032	1	1		22.2169	15.0166	29.4173	1387.79	1387.79		2.44479	42.9325	104.961	4506.24	0.307971	0.307971	0.0937039	8445.05
							4.20318	2.25753	1.62877	0.740173	1.51286	13.8377	22.5384	9.98363	16.261	2971.25		18.4429	22.6461	26.8492	22.4027	0.243325	1	1		16.2337	9.96689	22.5006	704.535	704.535		2.12654	42.2298	89.8035	3792.39	0.185776	0.185776	0.0489673	3714.06
							5.72346	2.47142	1.73571	0.73247	1.67623	31.3804	54.4672	22.0389	38.253	21584.1		19.0785	24.8019	30.5254	23.1238	1.67814	1	1		36.5718	21.0703	52.0734	3446.95	3446.95		2.55356	42.5326	108.61	4619.45	0.746183	0.746183	0.292027	26980.1
							5.24783	2.53438	1.76719	0.586499	1.58943	32.5599	57.5395	22.7036	40.1215	21537.3		16.3824	21.6302	26.878	21.3545	0.275703	1	1		40.0661	22.6722	57.46	4092.7	4092.7		4.02627	39.715	159.903	6350.54	0.644465	0.644465	0.211963	26921.6
							4.675	1.80551	1.40275	0.590209	1.59586	27.1844	38.133	21.1204	29.6267	11828.6		20.5031	25.1781	29.8531	21.1689	4.00917	1	1		15.2387	10.8635	19.614	669.398	669.398		3.32031	42.7911	142.08	6079.75	0.110103	0.110103	0.121599	14785.8
							4.42797	2.12045	1.56022	0.649644	1.61272	22.0929	34.4698	16.2559	25.3629	7794.82		17.7264	22.1543	26.5823	22.8004	0.646082	1	1		25.0915	16.082	34.1009	1722.88	1722.88		3.33341	47.8384	159.465	7628.53	0.225847	0.225847	0.0638624	9743.53
							4.226	1.57634	1.28817	0.605752	1.51976	19.1479	24.6658	15.6475	20.1566	5124.12		19.2646	23.4906	27.7166	23.3284	0.162212	1	1		20.1418	15.636	24.6476	1210.74	1210.74		1.69555	45.3002	76.8086	3479.45	0.347968	0.347968	0.0920426	6405.15
							5.33852	2.21249	1.60625	0.551022	1.62585	40.1327	64.4629	29.1359	46.7994	31499.9		20.9075	26.246	31.5845	21.6236	4.62238	1	1		23.4136	14.5766	32.2506	1476.88	1476.88		3.48125	47.3765	164.929	7813.78	0.189009	0.189009	0.251958	39374.9
							3.99679	1.56336	1.28168	0.578173	1.55855	20.3537	26.0869	16.6864	21.3867	5465.72		16.1325	20.1293	24.1261	21.4299	1.30057	1	1		20.2227	15.7783	24.6671	1222.72	1222.72		3.41526	42.7401	145.969	6238.72	0.195989	0.195989	0.054756	6832.15
							5.20254	2.13025	1.56512	0.632196	1.48099	22.6803	35.4975	16.6635	26.0805	9667.85		15.9848	21.1873	26.3898	24.4776	3.2903	1	1		20.2022	12.9077	27.4966	1115.01	1115.01		2.34484	45.0606	105.66	4761.11	0.234191	0.234191	0.126912	12084.8
							4.00795	2.39821	1.6991	0.674294	1.5796	16.7005	28.3758	11.8321	20.104	4227.49		16.4162	20.4241	24.4321	23.8786	3.45451	1	1		10.1938	5.99954	14.3881	271.189	271.189		3.03325	42.9385	130.243	5592.46	0.048492	0.048492	0.0472455	5284.37
							5.71433	2.20637	1.60318	0.661123	1.74754	43.3402	69.4824	31.4918	50.4871	39281.3		19.681	25.3953	31.1096	22.4831	2.91217	1	1		43.4389	27.0954	59.7823	5088.83	5088.83		4.05841	40.6828	165.108	6717.05	0.757599	0.757599	0.3655	49101.7
							5.12158	2.16977	1.58488	0.526645	1.63688	41.4048	65.6219	30.2437	47.9328	31932.9		18.4199	23.5414	28.663	20.3856	3.15589	1	1		37.7516	23.8198	51.6834	3867.57	3867.57		3.7837	40.3765	152.773	6168.42	0.626995	0.626995	0.323552	39916.1
							4.54678	2.48805	1.74402	0.565347	1.67171	32.6248	56.8983	22.8687	39.8835	18586.4		16.6284	21.1752	25.7219	24.5693	3.39413	1	1		26.5383	15.2167	37.8599	1809.88	1809.88		3.64641	46.5514	169.746	7901.9	0.229044	0.229044	0.147009	23233
							5.33245	2.17383	1.58692	0.650043	1.43431	20.4616	32.4709	14.9372	23.7041	8125.3		17.9463	23.2788	28.6112	19.4894	3.78935	1	1		16.6776	10.5094	22.8457	754.28	754.28		2.61613	45.1625	118.151	5335.98	0.141357	0.141357	0.0951711	10156.6
							4.45047	2.83914	1.91957	0.685884	1.62355	20.8246	39.9743	14.0797	27.027	7869.22		19.456	23.9064	28.3569	23.7959	0.110578	1	1		27.0187	14.0754	39.962	1767.08	1767.08		5.63709	39.8132	224.431	8935.31	0.197764	0.197764	0.055043	9836.52
							4.56702	2.37586	1.68793	0.654875	1.58484	21.7156	36.6545	15.4279	26.0412	8113.64		20.164	24.731	29.298	22.649	2.08196	1	1		23.1779	13.7315	32.6242	1407.37	1407.37		3.6392	45.6098	165.983	7570.47	0.185903	0.185903	0.0669843	10142.1
							4.80412	2.12205	1.56103	0.65503	1.47712	18.9769	29.6235	13.9598	21.7917	6241.38		16.1154	20.9195	25.7236	22.124	1.20451	1	1		21.0956	13.5139	28.6773	1217.5	1217.5		3.62038	44.2742	160.289	7096.67	0.17156	0.17156	0.0549675	7801.72
							4.96461	2.75539	1.87769	0.667915	1.76733	34.6447	65.0521	23.6091	44.3306	23953.8		17.7622	22.7268	27.6914	23.4461	0.71931	1	1		43.8628	23.3599	64.3657	4723.63	4723.63		4.54542	46.9823	213.554	10033.3	0.470797	0.470797	0.149215	29942.3
							5.47663	1.97817	1.48909	0.667125	1.64128	31.669	47.1579	23.8391	35.4985	19342.3		16.097	21.5736	27.0502	21.7737	0.20009	1	1		35.4748	23.8232	47.1264	3527.07	3527.07		4.36204	42.3117	184.565	7809.26	0.451652	0.451652	0.154802	24177.8
							4.20943	1.80965	1.40482	0.6773	1.4943	15.3335	21.5408	11.9033	16.7221	3390.81		18.5114	22.7208	26.9302	22.6503	0.0704771	1	1		16.7197	11.9016	21.5378	805.3	805.3		4.15238	43.3294	179.92	7795.82	0.103299	0.103299	0.0271845	4238.51
							4.08866	2.84277	1.92139	0.73009	1.45918	12.3528	23.7345	8.34908	16.0418	2545.37		18.2743	22.363	26.4516	22.1813	0.181684	1	1		16.026	8.34084	23.7111	621.314	621.314		2.87101	44.2659	127.088	5625.67	0.110443	0.110443	0.0282785	3181.71
							5.73721	1.6248	1.3124	0.629022	1.63269	36.9355	48.4741	29.8339	39.154	26065.8		19.9324	25.6696	31.4068	22.0465	3.62313	1	1		30.3586	23.1321	37.5851	2731.38	2731.38		2.92621	44.5676	130.414	5812.25	0.469934	0.469934	0.280289	32582.2
							5.30775	2.01782	1.50891	0.622012	1.78683	46.1039	69.5668	34.4761	52.0215	39992.7		17.1158	22.4236	27.7313	19.1399	3.2837	1	1		40.8711	27.0865	54.6557	4650.91	4650.91		2.3709	45.349	107.518	4875.83			0.512639	49990.9
							4.4969	2.10771	1.55386	0.65051	1.62217	23.018	35.7667	16.9694	26.3681	8574.51		15.5905	20.0874	24.5843	24.4175	4.33013	1	1		7.11432	4.57849	9.65015	138.805	138.805		2.75948	44.8632	123.799	5554.02	0.0249919	0.0249919	0.0964899	10718.1
							4.69592	2.66529	1.83265	0.622492	1.52286	21.6992	39.7669	14.9203	27.3436	8753.27		16.1622	20.8581	25.554	26.7169	5.85874	1	0		#NUM!	#NUM!	#NUM!	#NUM!			4.02316	45.5858	183.399	8360.39	#VALUE!		0.065437	10941.6
							4.29234	1.60196	1.30098	0.627077	1.62894	22.9497	29.857	18.6379	24.2475	7503.9		16.2023	20.4946	24.7869	23.5174	3.02276	1	1		17.2152	13.2325	21.1979	881.218	881.218		2.36893	47.0497	111.458	5244.05	0.168041	0.168041	0.0894334	9379.87
							3.73778	2.28716	1.64358	0.76549	1.59935	12.6307	20.7596	9.07661	14.9181	2212.62		16.6698	20.4076	24.1454	21.7304	1.32279	1	1		13.9527	8.48921	19.4162	517.822	517.822		3.08478	44.1633	136.234	6016.54	0.0860664	0.0860664	0.0229848	2765.78
							5.01811	2.2511	1.62555	0.645328	1.71833	33.9331	55.1599	24.5035	39.8317	21308		17.8514	22.8695	27.8876	25.7702	2.90067	1	1		32.503	19.9951	45.011	2827.43	2827.43		3.96268	39.1938	155.312	6087.29	0.464481	0.464481	0.218776	26635
							5.25172	1.93111	1.46556	0.500219	1.72158	57.2763	83.9417	43.468	63.7049	60200.4		18.747	23.9987	29.2505	18.4745	5.52421	0	0		#NUM!	#NUM!	#NUM!	#NUM!			3.38323	43.9679	148.753	6540.36	#VALUE!		0.575278	75250.5
							4.71776	2.36134	1.68067	0.587378	1.62749	29.6883	49.8962	21.1305	35.5134	15626.6		18.1868	22.9046	27.6223	21.6108	1.29381	1	1		34.1518	20.3204	47.9833	3063.17	3063.17		2.87451	40.3695	116.042	4684.58	0.653884	0.653884	0.208484	19533.2
							4.32861	2.32353	1.66176	0.626303	1.61259	22.5879	37.5357	16.1546	26.8452	8245.94		17.824	22.1526	26.4812	22.1117	0.0409158	1	1		26.844	16.1539	37.5341	1904.82	1904.82		2.97375	38.2947	113.879	4360.95	0.436789	0.436789	0.118179	10307.4
							4.50966	2.19884	1.59942	0.805166	1.385	10.8727	17.39	7.9087	12.6493	1948.49		19.3835	23.8931	28.4028	26.1718	2.27867	1	1		10.9158	6.82483	15.0067	321.756	321.756		3.21873	41.1239	132.367	5443.44	0.059109	0.059109	0.022372	2435.61
							4.74781	1.96211	1.48106	0.599599	1.50026	22.2937	33.0183	16.8279	24.9231	8287.58		17.1943	21.9421	26.6899	22.5748	0.632655	1	1		24.7008	16.6778	32.7238	1714.56	1714.56		3.40838	46.8757	159.77	7489.34	0.228934	0.228934	0.0691615	10359.5
							4.82406	2.85045	1.92522	0.605816	1.55264	25.0636	48.253	16.9282	32.5906	12379.4		18.4608	23.2849	28.109	18.4545	4.83046	0	1		#NUM!	#NUM!	#NUM!	#NUM!			4.49027	47.2794	212.297	10037.3	#VALUE!		0.0770837	15474.2
							4.4519	1.92793	1.46397	0.589097	1.51254	21.3087	31.1952	16.1806	23.6879	7059.57		17.162	21.6139	26.0658	20.3116	1.30226	1	1		22.6518	15.4729	29.8307	1450.06	1450.06		3.82911	43.9507	168.292	7396.55	0.196045	0.196045	0.0596526	8824.46
							4.97237	1.65668	1.32834	0.539036	1.44759	24.9371	33.1249	19.9948	26.5598	10346.3		16.9207	21.8931	26.8655	25.2427	3.34961	1	1		19.6292	14.7772	24.4812	1136.51	1136.51		1.86649	40.0331	74.7212	2991.32	0.379937	0.379937	0.216173	12932.9
							4.7397	1.59779	1.29889	0.698589	1.82398	32.8616	42.6837	26.7142	34.699	16978.8		20.473	25.2127	29.9524	19.9998	5.21283	0	0		#NUM!	#NUM!	#NUM!	#NUM!			3.29465	40.9594	134.947	5527.34	#VALUE!		0.191986	21223.5
							5.32346	2.09759	1.54879	0.519274	1.56097	37.8285	58.5886	27.9314	43.26	27368.4		16.6857	22.0091	27.3326	24.9862	2.97711	1	1		35.8627	23.1552	48.5702	3533.2	3533.2		2.51533	40.1906	101.093	4062.98			0.421003	34210.5
							4.71496	2.76828	1.88414	0.824649	1.62216	16.9167	31.8734	11.5138	21.6936	5435.95		19.6402	24.3552	29.0701	19.4959	4.85929	0	1		#NUM!	#NUM!	#NUM!	#NUM!			3.76227	44.6455	167.968	7499.03	#VALUE!		0.0453054	6794.94
							4.68882	2.31274	1.65637	0.594015	1.56624	25.4294	42.1205	18.2124	30.1664	11299.9		19.198	23.8868	28.5757	21.4355	2.45135	1	1		25.7154	15.5251	35.9057	1751.25	1751.25		4.81174	40.0971	192.937	7736.22	0.22637	0.22637	0.0912902	14124.8
							4.46746	2.26009	1.63004	0.72897	1.66397	20.4234	33.291	14.73	24.0105	6882.4		19.7254	24.1929	28.6604	20.7367	3.4562	1	1		15.2137	9.33332	21.0941	618.511	618.511		3.12665	39.753	124.294	4941.05	0.125178	0.125178	0.0870563	8602.99
							4.63878	1.924	1.462	0.711112	1.62514	21.0679	30.8012	16.009	23.4051	7185.97		20.3358	24.9746	29.6134	25.7054	0.730858	1	1		23.1128	15.809	30.4165	1510.65	1510.65		3.14313	39.7285	124.872	4960.98	0.304507	0.304507	0.0905312	8982.46
							4.21342	2.39615	1.69807	0.56187	1.40535	16.97	28.8163	12.0261	20.4212	4587.19		15.4236	19.637	23.8504	22.715	3.07801	1	1		13.9453	8.21244	19.6782	507.701	507.701		3.68607	45.5099	167.752	7634.39	0.0665019	0.0665019	0.0375537	5733.99
							5.14016	2.58612	1.79306	0.742893	1.38356	14.5299	26.053	10.0742	18.0636	4238.31		18.0848	23.2249	28.3651	23.9464	0.721502	1	1		17.8847	9.97443	25.7951	808.304	808.304		3.83771	45.5974	174.99	7979.08	0.101303	0.101303	0.0331986	5297.89
							4.86871	2.28358	1.64179	0.653179	1.62559	26.1899	42.9983	18.8294	30.9139	12383.7		17.2004	22.0691	26.9378	25.1424	3.07326	1	1		23.9767	14.604	33.3494	1530.07	1530.07		3.30804	43.2899	143.205	6199.32	0.246812	0.246812	0.124849	15479.6
							4.19797	2.2133	1.60665	0.704216	1.63672	18.5784	29.849	13.4862	21.6676	5308.95		16.7529	20.9509	25.1488	22.0997	1.14881	1	1		20.8405	12.9714	28.7096	1169.94	1169.94		3.66962	41.3964	151.909	6288.48	0.186044	0.186044	0.0527646	6636.18
							4.69452	1.9001	1.45005	0.594742	1.52901	23.5466	34.1438	17.9694	26.0566	9048.73		17.2971	21.9916	26.6861	22.0384	0.0467711	1	1		26.0553	17.9686	34.1421	1927.32	1927.32		2.11167	43.1329	91.0824	3928.65	0.490579	0.490579	0.143954	11310.9
							4.76723	1.81751	1.40875	0.613625	1.5149	22.3261	31.452	17.305	24.3785	8151.51		16.2961	21.0633	25.8306	27.023	5.9597	1	0		#NUM!	#NUM!	#NUM!	#NUM!			2.62378	48.4272	127.062	6153.27	#VALUE!		0.0827964	10189.4
							4.95434	2.21125	1.60563	0.706993	1.34802	13.7989	22.1558	10.0196	16.0877	3455.2		18.6684	23.6227	28.577	25.6563	2.03363	1	1		14.6699	9.13658	20.2033	579.904	579.904		3.3588	36.4072	122.285	4452.04	0.130256	0.130256	0.0485059	4319.01
							4.59148	2.03574	1.51787	0.496301	1.58763	34.1962	51.9054	25.4971	38.7013	19090		18.1288	22.7203	27.3118	19.8718	2.84851	1	1		30.3531	19.9972	40.7091	2557.46	2557.46		2.36727	44.0051	104.172	4584.09	0.557899	0.557899	0.260275	23862.5
							5.53094	2.04566	1.52283	0.551831	1.595	39.499	60.1501	29.4038	44.777	30731.9		18.0421	23.573	29.1039	25.2448	1.67184	1	1		42.6824	28.0284	57.3365	5048.69	5048.69		2.73448	39.2996	107.464	4223.28			0.454799	38414.8
							4.06335	2.6561	1.82805	0.722507	1.48549	13.007	23.7774	8.952	16.3647	2717.18		19.605	23.6683	27.7317	24.686	1.01771	1	1		15.8431	8.66667	23.0196	626.757	626.757		3.69793	46.5455	172.122	8011.5	0.0782322	0.0782322	0.0211975	3396.48
							5.14848	2.3261	1.66305	0.6933	1.6302	26.2729	43.6932	18.7839	31.2386	13274.8		17.9167	23.0651	28.2136	23.0399	0.0252832	1	1		31.2382	18.7837	43.6927	2578.33	2578.33		3.09304	40.9716	126.727	5192.21	0.496577	0.496577	0.159792	16593.5
							4.41005	1.95879	1.47939	0.620183	1.6246	24.2124	35.8196	18.2866	27.0531	9075.04		18.2064	22.6164	27.0265	19.7218	2.8946	1	1		20.4101	13.7963	27.0239	1171.28	1171.28		2.76834	40.8883	113.193	4628.26	0.25307	0.25307	0.122549	11343.8
							4.59916	2.48056	1.74028	0.638704	1.60996	24.0076	41.78	16.8429	29.3115	10167.5		18.0344	22.6336	27.2328	18.5817	4.05193	1	1		13.8669	7.96822	19.7657	494.792	494.792		3.66855	42.4878	155.869	6622.52	0.0747136	0.0747136	0.0959559	12709.4
							5.34804	1.96919	1.4846	0.626812	1.51393	25.6775	38.1207	19.3586	28.7396	12398.8		16.1262	21.4743	26.8223	23.9409	2.46668	1	1		25.5001	17.1765	33.8238	1825.18	1825.18		1.98447	43.7265	86.774	3794.32	0.481029	0.481029	0.204232	15498.5
							6.01617	2.73027	1.86514	0.582852	1.57642	39.6379	73.9301	27.0779	50.504	37836.1		19.4847	25.5009	31.5171	20.4493	5.05159	1	1		27.4287	14.706	40.1514	1855.01	1855.01		1.96886	44.07	86.7675	3823.84	0.485116	0.485116	0.618424	47295.2
							4.81805	1.65566	1.32783	0.698903	1.49939	18.0787	24.0055	14.499	19.2522	5268.29		17.8655	22.6835	27.5016	21.1885	1.49506	1	1		18.3019	13.7833	22.8205	988.162	988.162		3.06058	39.2789	120.216	4721.95	0.20927	0.20927	0.0697313	6585.36
							4.1045	2.16799	1.584	0.663378	1.541	16.5845	26.2697	12.1171	19.1934	4104.53		16.6061	20.7106	24.8151	22.335	1.62439	1	1		17.6264	11.1278	24.1249	843.382	843.382		3.32856	45.7437	152.261	6964.96	0.121089	0.121089	0.036832	5130.67
							4.7168	1.88266	1.44133	0.832397	1.63449	17.0331	24.5503	13.0402	18.7953	4743.93		16.4578	21.1746	25.8914	24.1878	3.0132	1	1		14.4602	10.0325	18.8879	595.311	595.311		2.62654	43.0159	112.983	4860.07	0.12249	0.12249	0.0610065	5929.92
							4.70894	1.92014	1.46007	0.647054	1.6199	24.9071	36.366	18.9393	27.6526	10189		19.2286	23.9375	28.6465	18.9948	4.94268	0	1		#NUM!	#NUM!	#NUM!	#NUM!			4.15726	41.9682	174.472	7322.29	#VALUE!		0.0869692	12736.3
							4.01476	1.59483	1.29741	0.646681	1.77878	25.7346	33.3885	20.9354	27.162	8816.34		16.1756	20.1904	24.2051	23.5245	3.3341	1	1		15.1314	11.6627	18.6	681.495	681.495		5.15532	44.6582	230.227	10281.6	0.0662833	0.0662833	0.0535932	11020.4
							5.31492	2.51416	1.75708	0.719375	1.80501	36.9594	64.9406	25.8299	45.3853	28008.3		16.8042	22.1191	27.4341	23.1144	0.995261	1	1		44.5824	25.373	63.7918	5084.96	5084.96		2.74739	42.4133	116.526	4942.24			0.354195	35010.3
							4.16975	1.88478	1.44239	0.604666	1.75657	29.7199	42.8678	22.7442	32.806	12772		17.9544	22.1242	26.2939	20.0577	2.06647	1	1		28.4939	19.7546	37.2332	2310.73	2310.73		3.45826	39.5625	136.817	5412.83	0.426898	0.426898	0.147474	15965
							3.75352	2.45131	1.72566	0.653247	1.63719	17.5072	30.2115	12.3246	21.268	4390.7		18.1731	21.9266	25.6801	22.7779	0.851317	1	1		20.7138	12.0034	29.4242	1109.58	1109.58		3.13003	45.1158	141.214	6370.98	0.174162	0.174162	0.0430732	5488.37
							4.89784	2.03984	1.51992	0.582631	1.60691	30.6033	46.5145	22.803	34.6588	16320.6		17.1055	22.0033	26.9011	20.4786	1.52467	1	1		32.9367	21.67	44.2034	3009.29	3009.29		3.42761	47.8175	163.9	7837.29	0.383971	0.383971	0.130151	20400.7
							4.18867	2.31447	1.65723	0.692716	1.62016	18.4582	30.5895	13.2167	21.9031	5320.11		17.8717	22.0603	26.249	16.8447	5.21561	0	0		#NUM!	#NUM!	#NUM!	#NUM!			3.11146	40.5712	126.236	5121.55	#VALUE!		0.0649231	6650.13
							5.05266	2.35306	1.67653	0.642602	1.57159	25.5552	42.8441	18.2078	30.526	12382.8		18.2122	23.2649	28.3176	20.177	3.08793	1	1		24.1618	14.4118	33.9118	1535.39	1535.39		3.68042	47.7145	175.609	8379.09	0.18324	0.18324	0.0923639	15478.5
							4.93655	2.60015	1.80008	0.630015	1.72883	35.132	63.2402	24.3217	43.781	23854		17.1734	22.11	27.0465	21.2041	0.905829	1	1		43.0376	23.9088	62.1665	4669.42	4669.42		4.32212	47.3079	204.47	9673.06	0.482725	0.482725	0.154127	29817.5
							4.96212	2.15438	1.57719	0.522377	1.54454	32.3648	51.0455	23.6938	37.3697	18854.3		17.7573	22.7195	27.6816	25.8478	3.12834	1	1		29.0076	18.392	39.6233	2289.44	2289.44		3.5794	39.7139	142.152	5645.41	0.405539	0.405539	0.208735	23567.9
							5.34994	2.03866	1.51933	0.764486	1.68565	26.567	40.3642	19.7993	30.0817	13432.1		16.8798	22.2297	27.5797	20.6988	1.53095	1	1		28.8237	18.9713	38.6762	2305.11	2305.11		2.92168	44.3278	129.512	5740.97	0.401519	0.401519	0.146231	16790.2
							4.7511	1.85982	1.42991	0.413174	1.53985	42.9789	61.4559	33.044	47.25	30311		15.9728	20.7239	25.475	22.7079	1.98396	1	1		42.9333	30.0251	55.8414	5267.34	5267.34		2.55514	41.913	107.094	4488.61			0.422055	37888.8
							5.525	2.15802	1.57901	0.516169	1.63212	47.8995	75.6338	35.0478	55.3408	46010.8		18.7678	24.2928	29.8178	26.1928	1.89999	1	1		51.9656	32.9102	71.0209	7342.89	7342.89		4.02479	40.2458	161.981	6519.03			0.44112	57513.4
							5.27427	1.95182	1.47591	0.675485	1.68704	32.0454	47.2962	24.2318	35.764	18990		19.2814	24.5557	29.8299	23.5641	0.99158	1	1		35.1263	23.7997	46.4528	3473.23	3473.23		3.20413	39.2235	125.677	4929.5	0.704581	0.704581	0.240769	23737.5
							6.13815	2.24992	1.62496	0.620371	1.59652	38.8288	63.0953	28.0434	45.5693	34120.4		16.9503	23.0884	29.2266	24.7912	1.70284	1	1		43.7807	26.9426	60.6187	5130.94	5130.94		2.93363	36.47	106.989	3901.89			0.546536	42650.5
							5.63394	2.16255	1.58127	0.740726	1.74625	34.5711	54.6663	25.2787	39.9725	24458.9		19.9295	25.5634	31.1974	22.7901	2.77335	1	1		34.7941	22.0038	47.5843	3289.36	3289.36		2.75739	44.1076	121.622	5364.46	0.613176	0.613176	0.284964	30573.6
							4.64118	2.3446	1.6723	0.681933	1.5206	18.4708	30.8888	13.1744	22.0316	5933.49		16.172	20.8132	25.4544	24.1013	3.28809	1	1		15.5488	9.29788	21.7998	636.776	636.776		3.03049	43.7275	132.516	5794.57	0.109892	0.109892	0.0639984	7416.87
							5.55805	1.82556	1.41278	0.606461	1.74994	48.2674	68.1911	37.3536	52.7724	44476.7		19.4323	24.9904	30.5484	23.1908	1.79955	1	1		49.9297	35.3415	64.518	7163.34	7163.34		2.31456	43.8902	101.587	4458.66			0.62346	55595.9
							4.99104	1.70316	1.35158	0.641981	1.5697	25.008	33.8003	19.8457	26.823	10517.9		19.073	24.0641	29.0551	23.1927	0.871385	1	1		26.411	19.5409	33.2812	2043.11	2043.11		3.10981	46.053	143.216	6595.52	0.309773	0.309773	0.0996686	13147.3
							5.34129	1.88014	1.44007	0.605053	1.51335	27.0024	38.8854	20.6822	29.7838	13495.2		18.1554	23.4967	28.838	23.1253	0.371401	1	1		29.7117	20.6321	38.7913	2514.36	2514.36		2.91672	39.3514	114.777	4516.63	0.55669	0.55669	0.186743	16869
							4.32685	2.32052	1.66026	0.622608	1.62465	23.3286	38.7316	16.6909	27.7112	8787.53		17.7747	22.1015	26.4284	24.7764	2.67486	1	1		21.7816	13.1194	30.4438	1254.77	1254.77		3.32246	45.0122	149.551	6731.62	0.186399	0.186399	0.0815882	10984.4
							4.02365	1.86055	1.43027	0.785516	1.73058	16.8961	24.166	12.9887	18.5773	3967.71		19.0888	23.1125	27.1361	25.0876	1.97513	1	1		16.1851	11.3161	21.0541	748.483	748.483		2.52114	42.5085	107.17	4555.64	0.164298	0.164298	0.054434	4959.63
							4.85527	2.11886	1.55943	0.660518	1.69492	29.4009	45.8487	21.6384	33.7435	15132.6		18.9902	23.8455	28.7008	18.5984	5.24713	0	0		#NUM!	#NUM!	#NUM!	#NUM!			3.69661	44.1966	163.377	7220.73	#VALUE!		0.130983	18915.8
							4.68628	2.41923	1.70961	0.719586	1.58774	19.5891	33.4899	13.8432	23.6666	6825.4		16.3563	21.0426	25.7288	21.9779	0.935288	1	1		23.1904	13.5647	32.8161	1398.45	1398.45		3.69121	43.3269	159.929	6929.22	0.20182	0.20182	0.0615636	8531.75
							5.04901	2.09288	1.54644	0.660444	1.58277	25.0135	38.6819	18.4826	28.5822	11340.4		17.9761	23.0251	28.0741	19.8645	3.16064	1	1		22.2893	14.4133	30.1653	1365.91	1365.91		3.25033	42.5854	138.417	5894.53	0.231724	0.231724	0.120242	14175.4
							4.82914	2.23806	1.61903	0.646028	1.45478	18.6604	30.2117	13.4991	21.8554	6187.27		16.1015	20.9306	25.7598	24.7957	3.8651	1	1		13.1024	8.09278	18.1121	460.486	460.486		2.00523	40.6967	81.6063	3321.1	0.138655	0.138655	0.116438	7734.08
							4.67269	2.16973	1.58486	0.691048	1.68815	25.1919	39.9257	18.4012	29.1634	10784.9		15.8508	20.5235	25.1962	23.842	3.3185	1	1		20.5313	12.9546	28.108	1143.95	1143.95		3.70188	47.183	174.666	8241.26	0.138807	0.138807	0.0817904	13481.1
							5.5419	1.71282	1.35641	0.678105	1.54845	25.8669	35.0861	20.4845	27.7853	12513.2		18.7029	24.2448	29.7867	23.9546	0.290185	1	1		27.7472	20.4563	35.038	2251.73	2251.73		3.74648	40.377	151.271	6107.88	0.368661	0.368661	0.128044	15641.5
							5.47549	1.81767	1.40884	0.576238	1.57728	34.8579	49.109	27.0175	38.0633	22823.4		17.1171	22.5926	28.068	19.3613	3.23123	1	1		30.7289	21.8115	39.6462	2716.68	2716.68		2.54507	43.0212	109.492	4710.47	0.576732	0.576732	0.302828	28529.2
							4.63539	1.84326	1.42163	0.669075	1.5918	21.7814	30.9651	16.7991	23.8821	7575.22		18.4043	23.0397	27.6751	23.9547	0.91499	1	1		23.4122	16.4686	30.3559	1570.54	1570.54		2.58604	41.9098	108.38	4542.2	0.345766	0.345766	0.104234	9469.02
							4.44224	2.0359	1.51795	0.691335	1.54862	17.8299	27.0649	13.2938	20.1794	5021.2		17.1831	21.6253	26.0675	18.54	3.08529	1	1		14.5182	9.56435	19.4721	585.083	585.083		4.15568	41.2749	171.525	7079.68	0.0826425	0.0826425	0.0443276	6276.5
							4.80938	2.09283	1.54641	0.517458	1.55577	32.0864	49.6189	23.709	36.6639	17774.6		18.7021	23.5115	28.3209	21.1652	2.34626	1	1		32.005	20.6962	43.3137	2816.22	2816.22		2.18797	46.8632	102.535	4805.13	0.586085	0.586085	0.231192	22218.2
							4.95139	2.31576	1.65788	0.592102	1.6744	35.0228	58.0637	25.0732	41.5684	22646		18.2714	23.2228	28.1742	22.0887	1.13414	1	1		40.4633	24.4066	56.5199	4333.7	4333.7		3.47393	47.0018	163.281	7674.48	0.56469	0.56469	0.184426	28307.5
							4.78531	1.82462	1.41231	0.627439	1.44026	18.6551	26.3468	14.4396	20.3932	5719.31		16.5276	21.3129	26.0982	19.4986	1.81428	1	1		18.8707	13.3616	24.3798	1023.38	1023.38		2.40294	43.1332	103.647	4470.61	0.228913	0.228913	0.0799571	7149.13
							4.4048	2.09348	1.54674	0.74998	1.46988	13.4945	20.8725	9.97022	15.4213	2879.75		18.5358	22.9406	27.3454	21.5989	1.34173	1	1		14.6885	9.49642	19.8806	593.115	593.115		3.7389	47.6833	178.283	8501.12	0.069769	0.069769	0.0211718	3599.69
							4.63793	1.78356	1.39178	0.667097	1.78266	31.713	44.1376	24.7469	34.4422	15914.9		17.1855	21.8235	26.4614	23.3952	1.57172	1	1		32.4042	23.2826	41.5259	3037.38	3037.38		2.59343	45.1112	116.993	5277.68	0.575515	0.575515	0.188469	19893.6
							5.57336	2.72684	1.86342	0.681245	1.76515	40.8556	76.131	27.9192	52.0251	37216.1		16.377	21.9503	27.5237	22.3236	0.373305	1	1		51.9083	27.8565	75.9601	6647.54	6647.54		2.83288	41.9519	118.845	4985.76			0.46653	46520.1
							4.38383	2.03909	1.51955	0.618152	1.57843	22.0221	33.4636	16.411	24.9373	7563.32		16.2124	20.5963	24.9801	23.696	3.09972	1	1		17.634	11.6048	23.6632	862.702	862.702		2.33926	42.8259	100.181	4290.34	0.20108	0.20108	0.11018	9454.16
							5.64416	2.30393	1.65197	0.65709	1.60212	31.3574	51.8014	22.4839	37.1426	20652		16.8129	22.4571	28.1012	23.0945	0.6374	1	1		36.905	22.34	51.47	3612.34	3612.34		2.7803	44.0508	122.475	5395.1	0.669559	0.669559	0.239245	25815
							5.89979	2.99555	1.99778	0.614298	1.63082	40.0142	79.9394	26.686	53.3127	39539.5		17.5603	23.4601	29.3599	25.6384	2.17828	1	1		49.5459	24.8005	74.2913	5788.27	5788.27		2.81113	39.4007	110.76	4364.03			0.56627	49424.4
							5.28954	2.33129	1.66565	0.630407	1.49641	24.12	40.1754	17.2331	28.7042	11505.1		16.6813	21.9709	27.2604	23.545	1.57409	1	1		27.4038	16.4524	38.3552	1982.45	1982.45		4.83566	41.9131	202.678	8494.85	0.233371	0.233371	0.0846479	14381.4
							4.77712	2.65529	1.82765	0.604217	1.58378	26.4359	48.3154	18.1959	33.2557	13194		15.4545	20.2316	25.0087	25.7576	5.52605	1	0		#NUM!	#NUM!	#NUM!	#NUM!			2.56446	45.004	115.411	5193.97	#VALUE!		0.158766	16492.5
							5.13064	2.11046	1.55523	0.648589	1.59929	27.3204	42.4895	20.1328	31.3112	13788.2		17.7087	22.8394	27.97	23.4417	0.602383	1	1		31.0946	19.9936	42.1956	2650.38	2650.38		4.10335	41.8821	171.857	7197.72	0.368225	0.368225	0.119727	17235.3
							5.38285	1.93464	1.46732	0.718445	1.77712	35.8347	52.5811	27.1787	39.8799	24166.9		17.7405	23.1233	28.5062	23.1916	0.0682479	1	1		39.8767	27.1765	52.5769	4488.88	4488.88		3.69448	43.4159	160.399	6963.87	0.644596	0.644596	0.216895	30208.6
							5.88371	2.26498	1.63249	0.607815	1.54685	33.4974	54.6842	24.1434	39.4138	24403.9		20.6788	26.5625	32.4462	19.7215	6.84097	0	0		#NUM!	#NUM!	#NUM!	#NUM!			2.98412	40.7288	121.54	4950.17	#VALUE!		0.30812	30504.9
							5.13458	2.79068	1.89534	0.610678	1.73276	40.0196	75.8506	27.18	51.5153	33255.5		20.3024	25.4369	30.5715	24.4613	0.975683	1	1		50.5767	26.6848	74.4686	6242.9	6242.9		2.91103	47.0276	136.899	6438.02			0.322843	41569.4
							5.00616	1.83231	1.41616	0.735993	1.36588	13.7175	19.4261	10.6019	15.014	3239.11		16.6622	21.6684	26.6745	21.0679	0.600498	1	1		14.9056	10.5254	19.2858	637.716	637.716		3.24906	42.6133	138.453	5899.95	0.108088	0.108088	0.0343129	4048.89
							4.39034	2.36528	1.68264	0.697314	1.5574	17.5579	29.5436	12.4905	21.0171	5089.7		18.9566	23.3469	27.7373	17.4528	5.8941	0	0		#NUM!	#NUM!	#NUM!	#NUM!			2.74567	40.5624	111.371	4517.47	#VALUE!		0.070417	6362.13
							4.90532	2.16209	1.58105	0.64051	1.51302	21.7635	34.4091	15.9147	25.1619	8438.96		15.7801	20.6854	25.5907	25.5395	4.85407	1	1		3.62792	2.29463	4.96121	35.7644	35.7644		3.0087	42.2502	127.118	5370.76	0.00665909	0.00665909	0.0982048	10548.7
							3.85493	1.88799	1.44399	0.540783	1.5484	20.9304	30.2234	16.0083	23.1158	5859.41		18.6453	22.5003	26.3552	21.3595	1.1408	1	1		22.0804	15.2912	28.8696	1386.86	1386.86		3.27609	42.1694	138.151	5825.75	0.238058	0.238058	0.0628611	7324.26
							5.16018	2.74541	1.87271	0.606329	1.57215	28.9755	54.2625	19.7648	37.0137	17386.3		17.521	22.6812	27.8414	23.7939	1.11273	1	1		36.1429	19.2998	52.9859	3212.65	3212.65		3.06702	42.0252	128.892	5416.71	0.593101	0.593101	0.20061	21732.9
							4.48115	2.23658	1.61829	0.622202	1.63855	25.409	41.1192	18.3849	29.752	10642.5		17.0748	21.5559	26.0371	20.8832	0.672754	1	1		29.4148	18.1765	40.6531	2321.42	2321.42		3.57765	46.6702	166.969	7792.49	0.297905	0.297905	0.0853587	13303.1
							4.58038	1.82153	1.41076	0.703862	1.54671	18.1182	25.5605	14.0325	19.7965	5161.26		19.1578	23.7382	28.3186	22.6866	1.05161	1	1		19.2677	13.6576	24.8777	1067.42	1067.42		2.57054	40.0834	103.036	4130.03	0.258454	0.258454	0.0781056	6451.57
							5.33465	1.82527	1.41264	0.712144	1.63362	26.8326	37.9047	20.7666	29.3356	13192.1		19.6002	24.9349	30.2695	20.9713	3.96362	1	1		19.6342	13.899	25.3695	1107.76	1107.76		2.24661	39.7066	89.2052	3542.03	0.312746	0.312746	0.232777	16490.1
							4.78247	2.09397	1.54699	0.681227	1.53175	19.7884	30.6124	14.6193	22.6158	6723.95		17.3469	22.1294	26.9118	20.8131	1.31629	1	1		21.7423	14.0546	29.43	1299.45	1299.45		3.7534	37.8254	141.974	5370.21	0.241974	0.241974	0.0782552	8404.94
							5.14316	1.66822	1.33411	0.563159	1.35663	20.099	26.8142	16.0736	21.4439	6963.98		18.3927	23.5358	28.679	24.0323	0.496482	1	1		21.3437	15.9985	26.689	1341.41	1341.41		2.46356	39.1525	96.4543	3776.42	0.355206	0.355206	0.115254	8704.97
							4.16734	2.47962	1.73981	0.744479	1.46495	12.4678	21.6916	8.74793	15.2197	2484.3		20.2662	24.4335	28.6009	23.5586	0.874968	1	1		14.8805	8.55294	21.2081	569.858	569.858		4.03277	44.0326	177.574	7819.03	0.0728809	0.0728809	0.0198578	3105.38
							4.48864	2.30467	1.65234	0.552645	1.54975	25.69	42.4485	18.4184	30.4335	11025		17.4828	21.9715	26.4601	20.8944	1.07701	1	1		29.5444	17.8804	41.2084	2314.8	2314.8		2.43861	43.579	106.272	4631.23	0.499824	0.499824	0.148787	13781.3
							5.28115	2.37507	1.68753	0.833984	1.71427	23.6653	39.9361	16.8147	28.3754	11141.2		17.1267	22.4079	27.6891	20.9455	1.46235	1	1		27.2659	16.1572	38.3745	1947.87	1947.87		1.88275	42.8484	80.6726	3456.69	0.563507	0.563507	0.201443	13926.5
							4.19187	1.95491	1.47746	0.761717	1.59176	15.0965	22.3044	11.4094	16.8569	3351.29		19.2256	23.4174	27.6093	20.1087	3.30874	1	1		10.3498	7.00513	13.6944	301.377	301.377		3.69437	40.1515	148.335	5955.85	0.0506019	0.0506019	0.0351681	4189.12
							5.32343	1.55791	1.27896	0.567485	1.77337	52.983	67.7629	43.496	55.6295	49292.7		17.4696	22.793	28.1165	26.6336	3.84054	1	1		38.5221	30.1199	46.9242	4440.18	4440.18		3.30144	38.6888	127.729	4941.67			0.623432	61615.9
							4.46838	1.6698	1.3349	0.638049	1.47219	17.5565	23.4361	14.0353	18.7357	4617.52		15.8233	20.2917	24.76	25.4464	5.15479	1	0		#NUM!	#NUM!	#NUM!	#NUM!			3.10771	45.5467	141.546	6446.95	#VALUE!		0.0447645	5771.9
							4.92565	2.57983	1.78992	0.724561	1.58035	20.676	37.0083	14.3452	25.6767	8215.22		17.6628	22.5885	27.5141	21.8224	0.766048	1	1		25.3643	14.1707	36.558	1627.5	1627.5		2.73755	39.3943	107.844	4248.44	0.383083	0.383083	0.120856	10269
							5.18867	2.21371	1.60685	0.608465	1.68355	36.9046	59.3003	26.7878	43.044	25894		15.9387	21.1273	26.316	23.9191	2.79173	1	1		36.2826	22.5799	49.9852	3545.79	3545.79		3.16923	45.0526	142.782	6432.7	0.551214	0.551214	0.251586	32367.5
							5.28816	2.0595	1.52975	0.701986	1.46995	19.4587	29.7669	14.4535	22.1102	7147.58		17.5758	22.8639	28.1521	23.7399	0.87594	1	1		21.8047	14.2538	29.3557	1314.54	1314.54		2.21743	42.3549	93.919	3977.93	0.330457	0.330457	0.112301	8934.48
							3.92571	2.38867	1.69434	0.689241	1.52574	14.2156	24.086	10.0834	17.0847	2995.31		18.2747	22.2004	26.1261	16.9032	5.29719	0	0		#NUM!	#NUM!	#NUM!	#NUM!			5.6597	42.814	242.314	10374.5	#VALUE!		0.018045	3744.14
							5.18894	2.07107	1.53554	0.701839	1.75416	33.4262	51.3271	24.7829	38.055	20736.1		20.023	25.2119	30.4009	24.5957	0.616214	1	1		37.7857	24.6075	50.9639	3939.85	3939.85		4.28744	44.3905	190.322	8448.48	0.466339	0.466339	0.153401	25920.1
							4.04915	1.85414	1.42707	0.686159	1.77168	23.2196	33.136	17.8714	25.5037	7533.09		19.6547	23.7038	27.753	23.2437	0.460128	1	1		25.3385	17.7556	32.9214	1836.39	1836.39		2.96265	42.6891	126.473	5399.02	0.340133	0.340133	0.0872043	9416.36
							4.63463	2.2747	1.63735	0.61226	1.5134	21.3992	35.0379	15.4033	25.2206	7858.11		16.6322	21.2669	25.9015	21.8763	0.609413	1	1		25.0016	15.2696	34.7337	1666.2	1666.2		3.52127	39.6228	139.523	5528.28	0.301396	0.301396	0.0888399	9822.63
							3.86181	1.94383	1.47191	0.683881	1.63846	17.0534	25.1011	12.9132	19.0071	3932.48		17.7241	21.5859	25.4477	26.2001	4.61418	1	0		#NUM!	#NUM!	#NUM!	#NUM!			2.51016	44.3259	111.265	4931.93	#VALUE!		0.0498345	4915.6
							4.51398	1.93564	1.46782	0.631265	1.7347	30.3417	44.5361	23.0085	33.7723	14531.5		18.9091	23.4231	27.9371	25.4026	1.97954	1	1		30.3516	20.6781	40.0252	2600.12	2600.12		3.70042	47.0349	174.049	8186.36	0.317616	0.317616	0.110943	18164.4
							5.29789	2.76441	1.8822	0.710592	1.49197	20.0315	37.7034	13.6389	25.6712	8558.79		17.84	23.1379	28.4358	25.2855	2.14762	1	1		23.4673	12.468	34.4667	1350.04	1350.04		1.86269	40.2737	75.0175	3021.23	0.44685	0.44685	0.177055	10698.5
							4.37926	2.00751	1.50376	0.628333	1.62633	23.5146	35.3603	17.614	26.4871	8568.88		19.4792	23.8584	28.2377	21.7789	2.07948	1	1		23.3105	15.5015	31.1194	1515.5	1515.5		3.43342	44.364	152.32	6757.54	0.224268	0.224268	0.079253	10711.1
							4.40675	2.12277	1.56138	0.673306	1.62931	21.3482	33.3328	15.7025	24.5176	7246.17		16.6964	21.1032	25.5099	25.0247	3.92148	1	1		11.1848	7.16339	15.2062	342.207	342.207		1.9896	41.6319	82.8309	3448.41	0.0992363	0.0992363	0.131332	9057.71
							4.77873	1.60283	1.30141	0.640425	1.58232	24.0503	31.2994	19.5276	25.4135	9175.9		17.0186	21.7973	26.576	18.6823	3.11503	1	1		19.2723	14.8087	23.7358	1104.26	1104.26		4.19793	43.9029	184.302	8091.38	0.136473	0.136473	0.0708771	11469.9
							4.56209	1.94396	1.47198	0.578229	1.48642	21.5485	31.719	16.3167	24.0178	7417.62		20.0017	24.5638	29.1259	22.909	1.65476	1	1		22.3822	15.2055	29.5589	1412.01	1412.01		2.08716	45.0506	94.0277	4236.01	0.333335	0.333335	0.109443	9272.03
							4.43645	2.3841	1.69205	0.715332	1.454	14.2015	24.0296	10.0791	17.0543	3375.62		18.7205	23.1569	27.5934	23.0486	0.108332	1	1		17.0493	10.0761	24.0224	760.429	760.429		3.02809	44.8297	135.748	6085.55	0.124957	0.124957	0.0346684	4219.53
							4.75552	1.74248	1.37124	0.614985	1.60969	26.9119	36.9028	21.1782	29.0405	11676.1		19.3507	24.1063	28.8618	21.9129	2.19336	1	1		25.7672	18.7911	32.7432	1932.96	1932.96		2.13766	41.9517	89.6787	3762.18	0.513789	0.513789	0.193971	14595.1
							4.84982	1.86379	1.43189	0.557604	1.57923	30.4456	43.5948	23.3905	33.4926	15536.4		17.0255	21.8753	26.7252	26.5013	4.62596	1	1		10.0583	7.0245	13.0922	288.92	288.92		2.30747	47.6986	110.063	5249.86	0.0550338	0.0550338	0.184962	19420.5
							4.67054	1.9453	1.47265	0.573903	1.61707	29.6747	43.7005	22.4647	33.0826	14404.7		19.056	23.7265	28.397	23.3832	0.343313	1	1		32.9931	22.4039	43.5822	3067.49	3067.49		1.85305	43.3394	80.3099	3480.58			0.258661	18005.8
							5.98007	2.77404	1.88702	0.495471	1.53582	45.8433	86.5074	31.1846	58.846	50681.5		19.3794	25.3594	31.3395	21.9118	3.4476	1	1		48.0823	25.4805	70.6841	5658.22	5658.22		3.53636	40.1497	141.984	5700.59			0.555661	63351.9
							4.67605	2.67962	1.83981	0.653028	1.47474	18.2317	33.5429	12.5178	23.0303	6168.19		17.2473	21.9234	26.5994	25.3637	3.4403	1	1		15.5979	8.47802	22.7178	605.079	605.079		3.99264	41.5133	165.748	6880.74	0.0879381	0.0879381	0.0560277	7710.23
							5.15453	2.0576	1.5288	0.678978	1.66519	29.236	44.696	21.7224	33.2092	15722.3		17.466	22.6206	27.7751	18.7565	3.86412	1	1		21.9788	14.3765	29.5811	1336.04	1336.04		5.66926	41.6963	236.387	9856.48	0.135549	0.135549	0.0996949	19652.8
							4.70679	2.5026	1.7513	0.578498	1.51874	24.1377	42.2723	16.8913	29.5818	10558.3		18.9368	23.6436	28.3503	22.7575	0.886059	1	1		29.0529	16.5893	41.5165	2163.71	2163.71		2.86667	41.5702	119.168	4953.83	0.436776	0.436776	0.133209	13197.9
							3.99509	1.93611	1.46805	0.593259	1.5419	18.9291	27.7889	14.353	21.0709	5005.98		20.0971	24.0922	28.0873	20.4339	3.65826	1	1		8.46817	5.76829	11.168	202.383	202.383		2.9092	40.6539	118.271	4808.16	0.0420916	0.0420916	0.0650714	6257.47
							5.84351	1.58247	1.29124	0.638543	1.65496	39.0135	50.3756	31.8335	41.1046	29439.4		18.1215	23.965	29.8085	22.7208	1.24418	1	1		40.1621	31.1036	49.2205	4809.58	4809.58		3.66555	43.5534	159.647	6953.17	0.691711	0.691711	0.264622	36799.3
							5.11405	2.12232	1.56116	0.674189	1.76143	35.4834	55.3952	26.1013	40.7483	23230		17.0327	22.1467	27.2608	23.8149	1.66819	1	1		38.5194	24.6736	52.3652	4059.06	4059.06		3.05835	42.987	131.469	5651.47	0.718231	0.718231	0.256902	29037.5
							4.76455	2.69144	1.84572	0.694512	1.67582	25.2094	46.5294	17.2879	31.9087	12040.4		20.3502	25.1148	29.8793	19.0473	6.06747	0	0		#NUM!	#NUM!	#NUM!	#NUM!			4.56967	37.3373	170.619	6370.46	#VALUE!		0.118128	15050.6
							4.89402	2.0501	1.52505	0.667677	1.51594	20.4851	31.2408	15.2387	23.2397	7319.56		19.847	24.741	29.635	23.9797	0.761294	1	1		22.9568	15.0532	30.8605	1459.42	1459.42		4.67088	41.7234	194.885	8131.28	0.179483	0.179483	0.0562608	9149.45
							5.23703	2.49301	1.74651	0.487903	1.58667	43.1981	75.4457	30.2629	52.8543	37564.7		15.7853	21.0224	26.2594	25.817	4.79463	1	1		21.2614	12.1737	30.3491	1160.69	1160.69		2.21482	40.5773	89.8712	3646.73	0.318283	0.318283	0.643808	46955.9
							4.49655	2.2474	1.6237	0.56386	1.68542	33.0949	53.7361	23.9104	38.8233	18150.2		17.5512	22.0477	26.5443	23.447	1.39928	1	1		36.8956	22.7232	51.068	3645.59	3645.59		4.48612	42.0996	188.864	7951.11	0.458501	0.458501	0.142671	22687.8
							5.10795	1.86827	1.43413	0.618431	1.63573	31.615	45.3402	24.2686	34.8044	17657.3		18.4143	23.5223	28.6302	20.3428	3.17949	1	1		27.2397	18.9939	35.4856	2117.46	2117.46		3.71277	40.8501	151.667	6195.61	0.341768	0.341768	0.178123	22071.6
							5.39756	2.43628	1.71814	0.589407	1.4352	24.0077	41.2487	16.931	29.0898	11842.4		18.5538	23.9513	29.3489	25.766	1.81467	1	1		27.3965	15.9454	38.8476	1946.03	1946.03		1.88974	41.6564	78.7197	3279.18	0.593451	0.593451	0.225712	14803
							4.0748	2.13341	1.56671	0.58694	1.4968	18.1793	28.4816	13.3503	20.9159	4867.54		18.2672	22.342	26.4168	24.0945	1.75253	1	1		18.8826	12.0524	25.7128	973.583	973.583		4.23439	39.8102	168.572	6710.89	0.145075	0.145075	0.0453325	6084.43
							5.12899	2.48307	1.74154	0.622642	1.53874	25.6548	44.6788	17.9934	31.3361	12953.8		18.9345	24.0634	29.1924	23.7536	0.309822	1	1		31.2789	17.9605	44.5972	2516.38	2516.38		2.15114	46.6562	100.364	4682.59	0.537391	0.537391	0.172898	16192.2
							4.14343	1.93349	1.46675	0.798315	1.59129	13.7425	20.1567	10.425	15.2909	2735.3		18.5511	22.6945	26.8379	23.4222	0.727697	1	1		15.0532	10.263	19.8434	639.793	639.793		2.55613	39.3597	100.608	3959.92	0.161567	0.161567	0.0431717	3419.13
							4.78565	2.42841	1.71421	0.740259	1.60417	19.965	34.2241	14.0932	24.1586	7251.57		17.2064	21.992	26.7777	23.8627	1.87069	1	1		22.2365	12.9719	31.5011	1283.74	1283.74		1.80437	40.3743	72.8501	2941.27	0.436457	0.436457	0.154091	9064.46
							4.39624	1.96189	1.48094	0.709652	1.4949	15.2761	22.623	11.5312	17.0771	3602.95		18.4194	22.8156	27.2119	21.3138	1.50186	1	1		16.0497	10.8375	21.2619	723.905	723.905		2.24596	46.07	103.471	4766.92	0.15186	0.15186	0.0472389	4503.69
							5.33909	2.6705	1.83525	0.715328	1.49601	20.2283	37.1241	13.9015	25.5128	8656.36		18.8171	24.1562	29.4953	22.7469	1.40933	1	1		24.6079	13.4085	35.8074	1508.35	1508.35		3.44411	42.935	147.873	6348.93	0.237575	0.237575	0.0852148	10820.5
							4.55587	2.15703	1.57852	0.569256	1.52499	23.8487	37.6456	17.4525	27.549	9403.55		17.2458	21.8017	26.3576	24.5577	2.756	1	1		21.9366	13.897	29.9762	1308.72	1308.72		3.34442	41.596	139.114	5786.6	0.226164	0.226164	0.101566	11754.4
							4.76354	2.06918	1.53459	0.682026	1.54795	20.2615	31.0932	15.0268	23.06	6992.16		18.449	23.2125	27.976	23.7395	0.526966	1	1		22.9185	14.9346	30.9024	1449.89	1449.89		2.16874	43.7467	94.8755	4150.49	0.349329	0.349329	0.105291	8740.2
							4.84111	1.88926	1.44463	0.535625	1.53844	29.5721	42.7208	22.6124	32.6666	14692		20.1182	24.9593	29.8004	23.0401	1.91918	1	1		29.99	20.7596	39.2204	2557.88	2557.88		2.95963	44.0801	130.461	5750.74	0.444792	0.444792	0.159675	18365
							5.46404	2.20813	1.60407	0.676344	1.598	28.1799	45.2024	20.4709	32.8366	15884.1		18.8312	24.2952	29.7592	17.082	7.21317	0	0		#NUM!	#NUM!	#NUM!	#NUM!			2.05734	41.0974	84.5512	3474.83	#VALUE!		0.285699	19855.1
							4.88276	2.04335	1.52167	0.643744	1.37232	16.1278	24.5412	12.0103	18.2757	4521.3		16.3585	21.2413	26.124	21.635	0.393768	1	1		18.2162	11.9712	24.4612	919.951	919.951		4.81542	45.6486	219.817	10034.3	0.0916804	0.0916804	0.0281615	5651.63
							5.34093	2.04926	1.52463	0.700458	1.51959	21.9095	33.4038	16.3005	24.8521	9136.15		16.8227	22.1636	27.5046	25.4494	3.28573	1	1		19.5927	12.8508	26.3347	1063.19	1063.19		5.68863	47.2958	269.049	12724.9	0.0835518	0.0835518	0.0448735	11420.2
							4.46229	2.41972	1.70986	0.596047	1.60916	25.5185	43.6331	18.0323	30.8327	11030		17.825	22.2873	26.7496	22.5149	0.227578	1	1		30.7926	18.0088	43.5764	2465.39	2465.39		4.01877	43.4837	174.751	7598.82	0.324444	0.324444	0.0907211	13787.5
							4.72791	2.36621	1.6831	0.628896	1.55222	22.9026	38.5474	16.2908	27.4191	9327.34		19.289	24.0169	28.7449	23.5774	0.43954	1	1		27.3004	16.2203	38.3805	1955.77	1955.77		4.87164	42.0601	204.902	8618.17	0.226936	0.226936	0.0676429	11659.2
							4.56148	2.05743	1.52872	0.573911	1.61944	28.7026	43.8782	21.3267	32.6024	13410		17.692	22.2535	26.815	24.2419	1.98839	1	1		29.3419	19.1938	39.49	2381.21	2381.21		2.80815	38.7868	108.919	4224.63	0.56365	0.56365	0.19839	16762.5
							5.3928	2.8093	1.90465	0.720713	1.52461	21.5072	40.9637	14.5815	27.7726	10119.6		19.6351	25.0279	30.4207	22.6782	2.34969	1	1		24.9978	13.1246	36.8709	1520.27	1520.27		3.02518	39.9107	120.737	4818.7	0.315493	0.315493	0.131255	12649.5
							4.19557	1.87751	1.43875	0.733528	1.49651	13.5961	19.5614	10.4188	14.9901	2686.33		18.6415	22.8371	27.0327	24.02	1.18285	1	1		14.3821	9.9962	18.7679	589.387	589.387		3.59064	47.5096	170.59	8104.66	0.072722	0.072722	0.020716	3357.92
							4.76056	2.18139	1.5907	0.533613	1.45697	24.2522	38.578	17.685	28.1315	10203.6		16.4331	21.1936	25.9542	24.9824	3.78877	1	1		17.0329	10.7078	23.3579	785.749	785.749		3.05043	46.1353	140.733	6492.74	0.12102	0.12102	0.098221	12754.5
							4.20306	2.00241	1.5012	0.602818	1.47722	17.6139	26.442	13.2051	19.8236	4610.54		19.8939	24.097	28.3001	24.4471	0.350131	1	1		19.7547	13.1592	26.3501	1089.34	1089.34		2.43896	39.9664	97.4765	3895.78	0.27962	0.27962	0.0739669	5763.18
							4.20193	2.26654	1.63327	0.65728	1.68677	22.8573	37.3322	16.471	26.9016	8117.12		19.4319	23.6338	27.8357	26.36	2.72625	1	1		20.4708	12.5336	28.4079	1118.58	1118.58		3.90438	42.5576	166.161	7071.4	0.158183	0.158183	0.0717425	10146.4
							4.58702	2.07761	1.5388	0.523949	1.47213	24.3839	37.5221	18.0602	27.7912	9765.41		19.665	24.252	28.839	21.1423	3.10974	1	1		20.4296	13.2763	27.583	1150.45	1150.45		1.92648	45.1893	87.0563	3934.01	0.292437	0.292437	0.155144	12206.8
							5.37024	2.25707	1.62854	0.838654	1.68008	22.6377	36.8663	16.3337	26.6	10159.2		15.2717	20.6419	26.0122	21.3876	0.745675	1	1		26.3423	16.1755	36.5092	1855.28	1855.28		3.70768	46.2605	171.519	7934.54	0.233823	0.233823	0.0800233	12699
							5.2839	2.40213	1.70107	0.663002	1.55067	24.9942	42.5168	17.6996	30.1082	12491.9		16.7557	22.0396	27.3235	21.4415	0.59806	1	1		29.9147	17.5859	42.2436	2333.86	2333.86		3.5128	36.2935	127.492	4627.12	0.504387	0.504387	0.168732	15614.9
							4.83041	2.04723	1.52361	0.724296	1.45909	15.9365	24.2811	11.8605	18.0708	4370.24		17.6508	22.4812	27.3116	21.6671	0.814119	1	1		17.8123	11.6908	23.9338	879.035	879.035		3.40842	41.2914	140.738	5811.29	0.151263	0.151263	0.0470016	5462.8
							5.75343	2.24704	1.62352	0.559224	1.63668	45.3812	73.6773	32.7886	53.233	43665		16.1419	21.8953	27.6487	22.8419	0.946635	1	1		52.5075	32.3418	72.6732	7383.93	7383.93		3.5006	48.7764	170.747	8328.41			0.327681	54581.3
							4.55234	1.64408	1.32204	0.677998	1.64798	23.0617	30.4885	18.5444	24.5164	8085.98		18.5404	23.0928	27.6451	21.7975	1.29529	1	1		23.5031	17.7779	29.2282	1632.42	1632.42		3.55277	38.781	137.78	5343.24	0.305512	0.305512	0.0945819	10107.5
							4.75197	1.77281	1.3864	0.650105	1.52234	20.6601	28.6433	16.157	22.4002	6908.88		18.1591	22.911	27.663	23.7156	0.804537	1	1		22.0768	15.9238	28.2298	1412.22	1412.22		2.04999	43.787	89.7628	3930.44	0.359304	0.359304	0.109862	8636.11
							4.63703	1.66389	1.33195	0.577241	1.54705	25.113	33.4492	20.1029	26.776	9795.67		17.1702	21.8072	26.4443	20.1989	1.60832	1	1		25.1139	18.855	31.3728	1858.36	1858.36		3.75523	45.9314	172.483	7922.37	0.234571	0.234571	0.0772785	12244.6
							4.22207	1.77493	1.38746	0.56291	1.63452	26.9369	37.3739	21.0566	29.2152	10438.4		17.2188	21.4409	25.663	20.8058	0.635067	1	1		28.8829	20.817	36.9487	2416.39	2416.39		2.50377	39.0674	97.8158	3821.41	0.632331	0.632331	0.170722	13048
							5.00141	1.9633	1.48165	0.56856	1.60456	32.7499	48.5238	24.7154	36.6196	18843.7		16.9256	21.927	26.9284	23.0194	1.09237	1	1		35.7355	24.1187	47.3523	3587.94	3587.94		2.5788	46.3245	119.462	5534.01	0.648344	0.648344	0.212817	23554.6
							4.23697	2.21724	1.60862	0.543777	1.61499	27.5409	44.3027	19.9811	32.1419	11783		16.5938	20.8307	25.0677	23.616	2.78523	1	1		24.2213	15.0572	33.3854	1579.25	1579.25		3.03369	42.3641	128.52	5444.63	0.290056	0.290056	0.135259	14728.7
							4.82178	2.23719	1.6186	0.71321	1.48885	17.2082	27.8531	12.45	20.1515	5252.92		17.6909	22.5127	27.3345	23.4633	0.950642	1	1		19.756	12.2056	27.3064	1047.07	1047.07		5.0806	46.7241	237.387	11091.7	0.0944013	0.0944013	0.0295994	6566.15
							4.5357	2.51882	1.75941	0.569527	1.68897	33.2647	58.5262	23.2356	40.8809	19377.5		16.8055	21.3412	25.8769	21.6997	0.358529	1	1		40.753	23.1628	58.3431	4245.52	4245.52		3.36723	42.2329	142.208	6005.85	0.706898	0.706898	0.201652	24221.9
							4.94562	1.81792	1.40896	0.543147	1.46813	25.6085	36.0813	19.8476	27.9644	11126.5		16.9629	21.9085	26.8542	21.1151	0.793415	1	1		27.6022	19.5905	35.614	2191.87	2191.87		4.78364	47.3849	226.672	10740.9	0.204069	0.204069	0.0647442	13908.2
							4.79929	2.08163	1.54082	0.745868	1.52643	17.1451	26.4174	12.6907	19.5541	5054.8		18.0258	22.8251	27.6244	23.1368	0.311635	1	1		19.5128	12.6639	26.3617	1048.8	1048.8		2.62976	46.5474	122.408	5697.79	0.184071	0.184071	0.0554469	6318.49
							5.6667	1.91276	1.45638	0.65787	1.48971	24.7265	36.0112	18.8268	27.419	12069.7		18.6496	24.3163	29.983	22.2852	2.03117	1	1		25.5971	17.5758	33.6183	1856.27	1856.27		3.0751	43.6733	134.3	5865.31	0.316484	0.316484	0.128613	15087.1
							3.97686	2.05834	1.52917	0.663135	1.6198	18.2014	27.8331	13.5221	20.6776	4702.13		17.6897	21.6666	25.6434	21.6557	0.0109067	1	1		20.6775	13.522	27.833	1182.37	1182.37		1.80279	41.554	74.913	3112.93	0.379824	0.379824	0.0944072	5877.66
							4.18207	2.41228	1.70614	0.660599	1.78046	26.7274	45.6007	18.9036	32.2521	11325.5		17.6168	21.7988	25.9809	20.863	0.935828	1	1		31.4343	18.4242	44.4443	2572.5	2572.5		3.86186	43.6391	168.528	7354.41	0.34979	0.34979	0.0962474	14156.9
							4.74726	2.5226	1.7613	0.640389	1.598	24.5619	43.2609	17.1493	30.2051	11064.6		16.6249	21.3722	26.1195	23.1375	1.76532	1	1		28.039	15.9195	40.1586	2008.43	2008.43		3.57664	36.6629	131.13	4807.62	0.417761	0.417761	0.143842	13830.7
							5.0558	1.86208	1.43104	0.759138	1.59607	20.6211	29.5097	15.8477	22.6787	7427.98		17.9719	23.0277	28.0835	20.6385	2.38921	1	1		19.9866	13.9665	26.0067	1141.1	1141.1		3.1945	42.5985	136.081	5796.84	0.196848	0.196848	0.0800865	9284.98
							4.57722	1.76898	1.38449	0.65498	1.70183	27.3515	37.8678	21.4066	29.6372	11656.6		18.4139	22.9912	27.5684	25.5355	2.54434	1	1		24.6365	17.7947	31.4783	1759.75	1759.75		3.48332	43.7788	152.496	6676.07	0.263591	0.263591	0.109126	14570.7
							4.8344	2.07264	1.53632	0.616695	1.55693	24.6784	37.9139	18.2926	28.1032	10533.3		19.8252	24.6596	29.494	22.7798	1.87981	1	1		25.8917	16.8531	34.9303	1849.4	1849.4		3.42662	46.0006	157.627	7250.93	0.255057	0.255057	0.0907931	13166.7
							4.9196	2.75229	1.87615	0.602002	1.75647	40.0387	75.1186	27.2931	51.2058	31686.9		19.3464	24.266	29.1856	22.0638	2.20221	1	1		45.7889	24.4058	67.172	5150.29	5150.29		4.47356	41.4518	185.437	7686.7	0.670026	0.670026	0.257644	39608.6
							4.65739	1.70321	1.3516	0.57329	1.4829	22.3408	30.1959	17.7289	23.9624	7832.89		16.474	21.1314	25.7888	24.1661	3.03467	1	1		18.1774	13.4488	22.906	967.79	967.79		3.17629	41.4703	131.721	5462.52	0.177169	0.177169	0.0896208	9791.11
							5.20958	1.90653	1.45326	0.701348	1.74296	32.953	47.8893	25.1186	36.504	19687.4		18.7584	23.968	29.1776	22.4211	1.54691	1	1		34.8576	23.9857	45.7294	3445.87	3445.87		3.36494	43.2004	145.367	6279.9	0.548714	0.548714	0.195937	24609.2
							5.39562	2.25649	1.62824	0.693413	1.58287	25.7284	41.8922	18.5652	30.2287	13183.3		17.6413	23.0369	28.4325	22.6992	0.337718	1	1		30.1694	18.5288	41.81	2433.76	2433.76		4.34647	48.1391	209.235	10072.4	0.241627	0.241627	0.0818033	16479.1
							4.45659	2.85079	1.92539	0.671716	1.51526	17.5902	33.868	11.8802	22.8741	5633.34		17.244	21.7005	26.1571	19.9497	1.75089	1	1		21.0348	10.9249	31.1447	1068.94	1068.94		4.99488	43.0637	215.098	9262.93	0.1154	0.1154	0.03801	7041.67
							4.79298	2.04364	1.52182	0.625442	1.52972	22.5378	34.2985	16.783	25.5407	8667.62		18.1749	22.9679	27.7609	24.9004	1.93255	1	1		23.3726	15.3583	31.3869	1514.4	1514.4		3.44319	39.7003	136.696	5426.87	0.279057	0.279057	0.099823	10834.5
							4.03935	2.7677	1.88385	0.694942	1.68307	19.3411	36.4356	13.1646	24.8001	6086.89		16.7794	20.8187	24.8581	22.679	1.86033	1	1		22.0134	11.6853	32.3415	1187.27	1187.27		2.08225	41.9606	87.3724	3666.2	0.323844	0.323844	0.103767	7608.61
							5.83019	2.2791	1.63955	0.726299	1.74946	38.2384	62.6938	27.5081	45.101	31587.7		18.553	24.3832	30.2134	25.4623	1.07913	1	1		44.3217	27.0328	61.6105	5232.34	5232.34		1.91826	44.0308	84.4623	3718.94			0.530858	39484.6
							4.92301	2.10227	1.55113	0.610596	1.56501	26.2206	40.6717	19.3466	30.0092	12169.6		17.3985	22.3215	27.2445	24.9657	2.64425	1	1		25.3129	16.319	34.3068	1758.83	1758.83		2.66714	40.137	107.051	4296.71	0.409343	0.409343	0.17702	15212.1
							5.70536	2.13055	1.56527	0.674784	1.69978	37.6612	58.95	27.669	43.3095	29235.5		17.5416	23.247	28.9524	19.5556	3.69138	1	1		33.023	21.0972	44.9487	2979.15	2979.15		3.29689	45.4998	150.008	6825.32	0.436485	0.436485	0.267711	36544.3
							4.42918	1.72491	1.36245	0.66864	1.56655	19.3347	26.3427	15.2719	20.8073	5597.93		16.1288	20.558	24.9871	22.7643	2.20633	1	1		18.042	13.2423	22.8417	950.258	950.258		3.45023	38.1722	131.703	5027.38	0.189017	0.189017	0.069593	6997.41
							5.0748	1.91317	1.45659	0.678068	1.54711	22.5112	32.7895	17.1388	24.9642	8959.54		20.2265	25.3013	30.3761	23.1219	2.1794	1	1		22.5449	15.4779	29.6118	1439.88	1439.88		2.41929	41.3227	99.9717	4131.1	0.348546	0.348546	0.13555	11199.4
							3.70819	2.5127	1.75635	0.52817	1.48266	17.9847	31.5875	12.5711	22.0793	4625.95		20.045	23.7532	27.4614	25.0908	1.33764	1	1		20.5927	11.7247	29.4607	1085.17	1085.17		4.08784	45.0656	184.221	8302.04	0.130711	0.130711	0.0348254	5782.44
							4.48667	2.24052	1.62026	0.701064	1.63639	20.8546	33.7898	15.0813	24.4355	7182.87		19.9026	24.3893	28.876	26.9664	2.57707	1	1		20.0026	12.3453	27.6599	1072.76	1072.76		2.49735	37.57	93.8254	3525.02	0.304327	0.304327	0.127355	8978.58
							4.87074	2.03695	1.51848	0.753888	1.68625	23.2461	35.2987	17.3292	26.3139	9360.13		18.4371	23.3078	28.1786	24.4716	1.16377	1	1		25.5518	16.8273	34.2763	1812	1812		4.39187	47.5399	208.789	9925.84	0.182554	0.182554	0.0589379	11700.2
							5.15506	1.84485	1.42242	0.683394	1.49104	20.3461	28.9408	15.6874	22.3141	7352.67		16.5324	21.6874	26.8425	23.3478	1.66032	1	1		21.1251	14.8515	27.3987	1278.35	1278.35		3.50489	39.6417	138.94	5507.82	0.232097	0.232097	0.0834344	9190.84
							4.40301	1.75634	1.37817	0.630318	1.69003	26.7122	36.814	20.9606	28.8873	10673.7		16.9371	21.3401	25.7431	21.5467	0.206586	1	1		28.8555	20.9375	36.7734	2418.85	2418.85		3.74024	44.9003	167.938	7540.46	0.320783	0.320783	0.0884704	13342.2
							4.93179	2.06035	1.53017	0.619579	1.60325	27.8217	42.5721	20.6626	31.6173	13629		19.4216	24.3534	29.2852	23.4105	0.942898	1	1		31.0341	20.2814	41.7868	2662.48	2662.48		3.45561	42.1514	145.659	6139.72	0.433649	0.433649	0.138738	17036.2
							5.29854	2.62986	1.81493	0.755753	1.64947	24.8359	45.0754	17.1398	31.1076	12860.3		18.3886	23.6872	28.9857	22.9834	0.703739	1	1		30.832	16.988	44.676	2384.33	2384.33		5.12657	45.2419	231.936	10493.2	0.227226	0.227226	0.0765992	16075.4
							4.49941	2.40295	1.70147	0.661271	1.58072	20.7199	35.2544	14.6713	24.9628	7311.18		17.263	21.7624	26.2618	24.3923	2.62989	1	1		20.2548	11.9042	28.6053	1069.79	1069.79		2.11073	45.5453	96.1337	4378.44	0.244331	0.244331	0.104363	9138.97
							4.63667	1.9738	1.4869	0.625882	1.42558	17.372	25.8304	13.0866	19.4585	4923.97		20.2852	24.9219	29.5586	17.1402	7.78173	0	0		#NUM!	#NUM!	#NUM!	#NUM!			4.53379	48.4889	219.839	10659.7	#VALUE!		0.0288702	6154.97
							5.51775	2.34749	1.67375	0.661918	1.75972	41.7469	69.8737	29.7653	49.8195	36052.5		19.8268	25.3445	30.8623	19.7792	5.5653	0	1		#NUM!	#NUM!	#NUM!	#NUM!			3.38822	42.4588	143.86	6108.12	#VALUE!		0.3689	45065.7
							4.60353	2.59219	1.79609	0.560782	1.48396	22.7394	40.8421	15.7558	28.2989	9306.57		18.3569	22.9604	27.5639	23.0214	0.0609572	1	1		28.2965	15.7544	40.8385	2021.26	2021.26		2.97245	45.343	134.78	6111.32	0.33074	0.33074	0.0951776	11633.2
							4.76672	2.83796	1.91898	0.734794	1.52255	17.2343	33.0724	11.6536	22.363	5771.57		16.4781	21.2449	26.0116	22.7445	1.4996	1	1		21.2275	11.0619	31.3931	1090.97	1090.97		4.65492	42.3648	197.205	8354.53	0.130584	0.130584	0.043177	7214.47
							4.26884	1.78328	1.39164	0.607532	1.60252	22.7467	31.6553	17.7511	24.7032	7535.84		17.8209	22.0897	26.3586	20.9525	1.13721	1	1		23.8105	17.1097	30.5113	1640.03	1640.03		4.33131	38.7119	167.673	6490.93	0.252665	0.252665	0.0725612	9419.8
							4.79159	2.11852	1.55926	0.589274	1.47565	22.0336	34.3561	16.217	25.2866	8386.95		16.6591	21.4507	26.2423	25.7858	4.33514	1	1		10.7712	6.90786	14.6345	317.592	317.592		3.59903	41.0208	147.635	6056.11	0.0524417	0.0524417	0.0865547	10483.7
							4.32597	2.16695	1.58347	0.597184	1.53758	21.0028	33.2574	15.3476	24.3025	6936.85		18.1167	22.4427	26.7686	25.4799	3.03718	1	1		17.3057	10.929	23.6825	813.125	813.125		2.43614	48.2171	117.463	5663.75	0.143567	0.143567	0.0765487	8671.06
							5.57498	2.02432	1.51216	0.712422	1.56956	25.2588	38.1952	18.8682	28.5317	12622.1		19.1138	24.6887	30.2637	21.9025	2.78626	1	1		24.7128	16.3428	33.0829	1698.55	1698.55		2.33727	49.1491	114.875	5645.99	0.300842	0.300842	0.139725	15777.7
							3.7108	1.89844	1.44922	0.580019	1.51801	16.7324	24.2489	12.7731	18.511	3610.82		18.3988	22.1096	25.8204	21.2486	0.860972	1	1		18.0059	12.4245	23.5872	920.675	920.675		2.55525	40.3603	103.131	4162.38	0.221189	0.221189	0.054218	4513.52
							4.86716	1.97158	1.48579	0.682869	1.47236	18.0232	26.7787	13.5824	20.1806	5561.5		16.9827	21.8499	26.7171	18.4708	3.37913	1	1		14.5242	9.77543	19.273	591.882	591.882		2.60635	42.0453	109.585	4607.52	0.12846	0.12846	0.0754404	6951.87
							3.94023	2.44928	1.72464	0.554455	1.53513	20.2956	35.0026	14.291	24.6468	6192.05		16.9438	20.884	24.8242	24.6276	3.7436	1	1		7.68877	4.45819	10.9194	152.935	152.935		2.65556	40.2643	106.924	4305.23	0.035523	0.035523	0.0898915	7740.06
							5.08561	2.37255	1.68627	0.482925	1.54636	38.1148	64.2719	27.0898	45.6809	27817.7		19.7413	24.8269	29.9125	20.435	4.39194	1	1		23.0311	13.658	32.4042	1390.4	1390.4		2.7548	45.5213	125.402	5708.48	0.243567	0.243567	0.304565	34772.1
							4.56878	2.07419	1.53709	0.633716	1.51168	19.8098	30.4495	14.6802	22.5649	6415.98		16.0278	20.5965	25.1653	23.7462	3.14967	1	1		16.3458	10.6342	22.0574	736.9	736.9		2.88502	43.066	124.246	5350.77	0.137718	0.137718	0.0749422	8019.97
							4.73535	1.73676	1.36838	0.700893	1.64832	23.3138	31.9022	18.3688	25.1355	8717.73		18.1864	22.9218	27.6571	22.766	0.155773	1	1		25.1219	18.3589	31.8849	1839	1839		2.21805	45.9922	102.013	4691.79	0.39196	0.39196	0.11613	10897.2
							4.61375	1.68181	1.3409	0.562393	1.54802	25.9964	34.8586	20.7269	27.7928	10472.4		16.3401	20.9539	25.5676	21.5445	0.590654	1	1		27.5641	20.5563	34.5718	2232.63	2232.63		3.25338	41.0786	133.644	5489.92	0.406679	0.406679	0.119224	13090.6
							5.23946	1.97236	1.48618	0.629295	1.42964	20.6959	30.7578	15.5944	23.1761	7895.18		16.5565	21.7959	27.0354	23.8222	2.02625	1	1		21.3729	14.3811	28.3647	1281.5	1281.5		2.89515	43.6716	126.436	5521.65	0.232087	0.232087	0.0893662	9868.97
							5.69311	1.79678	1.39839	0.490544	1.70595	65.5053	91.6021	50.9811	71.2916	83524.6		18.3332	24.0263	29.7195	23.7419	0.284408	1	1		71.2026	50.9175	91.4877	14634.6	14634.6		3.85873	37.3684	144.195	5388.32			0.968816	104406
							5.62331	1.58724	1.29362	0.617243	1.5519	30.8393	39.8943	25.1344	32.5143	17714.2		19.4505	25.0738	30.6971	24.1925	0.881234	1	1		32.1126	24.8238	39.4013	3072.77	3072.77		5.56524	40.0925	223.124	8945.61	0.343495	0.343495	0.123763	22142.7
							3.71223	2.27447	1.63723	0.733286	1.63666	14.2167	23.2761	10.2337	16.7549	2777.96		20.7807	24.4929	28.2051	16.6652	7.8277	0	0		#NUM!	#NUM!	#NUM!	#NUM!			2.66662	40.6788	108.475	4412.64	#VALUE!		0.0393467	3472.45
							4.40937	1.84311	1.42155	0.812385	1.54709	13.6935	19.466	10.5615	15.0138	2847.94		18.4327	22.8421	27.2514	22.6843	0.157745	1	1		15.0042	10.5548	19.4536	645.057	645.057		4.7483	43.7591	207.781	9092.31	0.0709453	0.0709453	0.0195766	3559.92
							5.03634	1.96975	1.48487	0.607133	1.57617	28.0696	41.6798	21.16	31.4199	13954.2		18.4407	23.477	28.5134	20.0005	3.47654	1	1		22.7333	15.3099	30.1567	1450.46	1450.46		3.54999	38.0039	134.914	5127.25	0.282893	0.282893	0.170099	17442.8
							4.25018	2.5633	1.78165	0.550468	1.52646	22.6465	40.3481	15.7407	28.0444	8480.19		17.4661	21.7163	25.9665	21.1605	0.555841	1	1		27.8036	15.6055	40.0016	1961.13	1961.13		3.54258	41.8692	148.325	6210.24	0.315789	0.315789	0.0853448	10600.2
							4.33277	2.11204	1.55602	0.693891	1.58874	18.357	28.5639	13.5243	21.0441	5258.33		18.5923	22.9251	27.2578	21.1597	1.76538	1	1		19.2181	12.3508	26.0853	1012.14	1012.14		1.81094	41.5845	75.307	3131.6	0.323202	0.323202	0.104945	6572.91
							5.27098	1.77788	1.38894	0.631405	1.70445	37.2211	51.6978	29.0783	40.3881	24893.3		16.6287	21.8997	27.1707	17.9597	3.94003	1	1		26.8285	19.3158	34.3412	2083.9	2083.9		4.44456	42.4345	188.603	8003.25	0.260382	0.260382	0.1944	31116.7
							3.99266	1.92789	1.46395	0.848343	1.58237	11.5997	16.9814	8.80827	12.8948	1876.19		17.4603	21.453	25.4456	25.5034	4.0504	1	1		#NUM!	#NUM!	#NUM!	#NUM!			1.89764	39.1014	74.2005	2901.35	#VALUE!		0.0404163	2345.23
							5.47361	2.19234	1.59617	0.53193	1.51924	34.523	55.1046	25.135	40.1198	23817.2		17.4122	22.8858	28.3595	22.4529	0.43289	1	1		39.9941	25.0563	54.932	4324.06	4324.06		3.43863	42.3537	145.638	6168.32	0.701012	0.701012	0.241326	29771.5
							5.23281	1.84842	1.42421	0.724026	1.64847	26.0619	37.1176	20.0807	28.5992	12253.1		16.9811	22.2139	27.4468	23.1953	0.981368	1	1		28.0917	19.7244	36.459	2259.23	2259.23		3.26933	45.1286	147.54	6658.28	0.339311	0.339311	0.115017	15316.3
							4.63971	1.77101	1.38551	0.639091	1.68031	27.966	38.7471	21.8785	30.3128	12356.5		17.1774	21.8171	26.4568	26.0403	4.22315	1	1		12.5533	9.06043	16.0462	456.741	456.741		2.98443	42.8917	128.007	5490.44	0.0831884	0.0831884	0.14066	15445.7
							4.03863	2.05147	1.52574	0.651251	1.60334	18.6477	28.4514	13.8688	21.1601	5006.41		17.0576	21.0962	25.1349	21.9315	0.835236	1	1		20.7027	13.569	27.8363	1186.61	1186.61		3.10417	43.8103	135.995	5957.97	0.199164	0.199164	0.052518	6258.02
							4.98575	2.38817	1.69409	0.587126	1.55771	27.9969	47.4291	19.86	33.6446	14753.8		18.073	23.0588	28.0445	18.8924	4.16642	1	1		18.4789	10.9079	26.0499	892.68	892.68		2.78427	47.4191	132.027	6260.62	0.142587	0.142587	0.147288	18442.3
							5.10267	2.47551	1.73775	0.663628	1.66309	29.7363	51.6745	20.8743	36.2744	17291.6		18.738	23.8407	28.9433	21.1559	2.68477	1	1		30.8475	17.7513	43.9436	2450.62	2450.62		2.34716	40.5395	95.1529	3857.45	0.635295	0.635295	0.280165	21614.5
							5.12854	2.41907	1.70954	0.664833	1.61712	27.2169	46.5283	19.2339	32.8811	14418.8		16.4617	21.5903	26.7188	21.531	0.0593353	1	1		32.8789	19.2327	46.5252	2811.11	2811.11		5.22883	39.9539	208.912	8346.87	0.336786	0.336786	0.107966	18023.5
							4.35206	2.79705	1.89852	0.664979	1.71615	25.1294	47.7087	17.0568	32.3828	11126.1		20.3215	24.6736	29.0256	22.566	2.10756	1	1		28.3324	14.9234	41.7414	1956.97	1956.97		2.16212	40.584	87.7474	3561.14	0.549533	0.549533	0.195268	13907.6
							5.91629	1.75611	1.37806	0.683891	1.50435	25.6842	35.3943	20.1549	27.7746	13259.1		16.3088	22.2251	28.1414	21.2103	1.01481	1	1		27.363	19.8562	34.8698	2175.18	2175.18		4.05134	40.2387	163.021	6559.74	0.331596	0.331596	0.12633	16573.9
							3.89663	2.64183	1.82091	0.791948	1.6414	13.6721	24.8957	9.42367	17.1597	2871.99		17.4928	21.3895	25.2861	22.5376	1.14816	1	1		16.3979	9.00529	23.7904	673.054	673.054		3.71629	45.4427	168.878	7674.3	0.0877023	0.0877023	0.0233897	3589.99
							5.07023	2.14268	1.57134	0.55369	1.52999	29.6129	46.532	21.7167	34.1244	16096.2		17.0972	22.1674	27.2377	19.3522	2.8153	1	1		28.3804	18.0613	38.6996	2195.86	2195.86		4.26477	43.0886	183.763	7918.1	0.277321	0.277321	0.127052	20120.2
							5.13428	1.98669	1.49334	0.663194	1.61006	26.9824	40.2941	20.282	30.2881	13182		17.214	22.3482	27.4825	22.7237	0.375489	1	1		30.207	20.2277	40.1862	2553.72	2553.72		3.82779	44.2026	169.198	7479	0.341452	0.341452	0.110159	16477.5
							4.12569	2.153	1.5765	0.581076	1.55597	21.1126	33.284	15.4594	24.3717	6669.22		19.0905	23.2162	27.3419	21.6177	1.59855	1	1		22.4679	14.2518	30.6841	1373.83	1373.83		2.7028	48.1122	130.038	6256.39	0.219588	0.219588	0.066624	8336.52
							4.88197	2.06635	1.53318	0.612292	1.46124	20.7734	31.8493	15.4133	23.6313	7529.07		17.741	22.623	27.505	24.5148	1.89182	1	1		21.7849	14.209	29.3608	1310.63	1310.63		2.22324	47.3107	105.183	4976.28	0.263376	0.263376	0.094562	9411.34
							4.82844	1.60951	1.30476	0.492499	1.50191	30.8317	40.2279	24.9938	32.6108	15251.6		17.8279	22.6564	27.4848	23.8579	1.20149	1	1		31.5851	24.2076	38.9625	2963.12	2963.12		3.64385	43.6911	159.204	6955.78	0.425994	0.425994	0.137041	19064.5
							3.83686	2.21829	1.60915	0.629381	1.58025	17.4018	28.002	12.6232	20.3126	4260.74		16.4446	20.2814	24.1183	24.9875	4.70607	1	0		#NUM!	#NUM!	#NUM!	#NUM!			4.39414	46.8266	205.763	9635.17	#VALUE!		0.027638	5325.93
							5.28686	2.09996	1.54998	0.595869	1.5197	27.5894	42.763	20.3637	31.5634	14463.5		18.8033	24.0901	29.377	21.5319	2.55826	1	1		27.622	17.8209	37.4231	2095.17	2095.17		3.51402	42.1241	148.025	6235.41	0.336011	0.336011	0.144973	18079.4
							4.50656	2.02175	1.51087	0.704456	1.47981	15.5852	23.5472	11.647	17.5971	3882.82		16.8769	21.3835	25.8901	19.4687	1.91478	1	1		15.9297	10.5434	21.316	706.05	706.05		3.15878	41.0009	129.513	5310.14	0.132963	0.132963	0.0457006	4853.53
							4.55598	2.19012	1.59506	0.621081	1.47653	18.9601	30.2425	13.8086	22.0256	5977.24		19.5474	24.1034	28.6594	22.7945	1.30895	1	1		21.097	13.2265	28.9675	1203.66	1203.66		2.86792	47.3411	135.77	6427.52	0.187267	0.187267	0.0581216	7471.55
							4.4406	1.71724	1.35862	0.630932	1.93745	43.8436	59.5669	34.6875	47.1272	28825		16.5266	20.9672	25.4078	22.119	1.15184	1	1		45.5142	33.5003	57.5281	6054.5	6054.5		2.24661	41.8474	94.0147	3934.28			0.457915	36031.3
							5.27175	2.18923	1.59462	0.599911	1.70139	40.3541	64.3493	29.3935	46.8714	31325.7		18.3801	23.6518	28.9236	23.4002	0.25159	1	1		46.818	29.36	64.276	5928.64	5928.64		2.76958	42.3785	117.371	4974			0.393617	39157.1
							5.44717	2.62306	1.81153	0.548584	1.6069	39.9913	72.4455	27.6187	50.0321	34240.1		16.9131	22.3602	27.8074	24.3586	1.99842	1	1		46.5434	25.6929	67.3939	5439.8	5439.8		2.71174	44.3847	120.36	5342.14			0.40059	42800.2
							4.35289	1.94571	1.47285	0.593314	1.86715	41.3049	60.8362	31.2668	46.0515	26012		16.8817	21.2346	25.5875	20.3266	0.908007	1	1		45.0384	30.579	59.4979	5715.77	5715.77		4.12603	42.9393	177.169	7607.51	0.751333	0.751333	0.213703	32515
							4.75502	1.63314	1.31657	0.651083	1.6509	26.6429	35.0772	21.4784	28.2778	11254.6		17.6321	22.3871	27.1421	20.6366	1.75051	1	1		26.2918	19.97	32.6137	2046.1	2046.1		3.08095	48.8965	150.647	7366.12	0.277772	0.277772	0.0954926	14068.2
							5.47222	2.07834	1.53917	0.643285	1.54022	27.0417	41.6218	20.0264	30.8241	14329.7		16.8347	22.3069	27.7791	24.4712	2.16432	1	1		28.3108	18.3935	38.228	2209	2209		3.59215	36.9474	132.721	4903.68	0.450478	0.450478	0.18264	17912.1
							4.85463	1.74462	1.37231	0.683991	1.47998	18.1811	24.9501	14.3012	19.6257	5441.92		18.7362	23.5909	28.4455	23.6861	0.0952269	1	1		19.6219	14.2985	24.9453	1120.54	1120.54		3.37848	43.8398	148.112	6493.2	0.172572	0.172572	0.052381	6802.4
							4.90721	2.3954	1.6977	0.743594	1.6347	21.859	37.1101	15.4922	26.3011	8863.19		19.2871	24.1943	29.1015	23.087	1.10727	1	1		25.6228	15.0927	36.153	1714.2	1714.2		2.98745	40.7037	121.6	4949.59	0.346331	0.346331	0.111918	11079
							5.62818	1.89621	1.44811	0.732554	1.76826	36.7998	53.29	28.1034	40.6967	26480.3		17.5304	23.1586	28.7868	21.9003	1.25827	1	1		39.6666	27.3921	51.9412	4469.79	4469.79		2.49981	47.3991	118.489	5616.25	0.795866	0.795866	0.294684	33100.4
							4.43464	3.19722	2.09861	0.750613	1.56862	16.2217	34.043	10.6477	22.3454	5050.02		18.1897	22.6243	27.059	22.3786	0.245749	1	1		22.311	10.6313	33.9907	1135.27	1135.27		2.19208	41.6995	91.4086	3811.7	0.297838	0.297838	0.0828047	6312.52
							5.12683	1.88509	1.44255	0.734391	1.39299	14.9821	21.6124	11.4649	16.5386	3990.9		17.9425	23.0693	28.1962	27.0563	3.98701	1	1		10.3973	7.20757	13.5869	307.652	307.652		3.40827	43.9163	149.679	6573.32	0.0468032	0.0468032	0.037946	4988.62
							4.82807	2.28238	1.64119	0.720593	1.69302	25.0365	41.0897	18.003	29.5463	11220.2		18.1373	22.9653	27.7934	24.1746	1.2093	1	1		28.6045	17.4291	39.7799	2178.16	2178.16		3.07668	42.4253	130.529	5537.75	0.393329	0.393329	0.126633	14025.3
							5.18752	1.96662	1.48331	0.591807	1.56675	29.9983	44.4968	22.626	33.5614	16407.7		19.3143	24.5018	29.6893	24.2567	0.245151	1	1		33.5239	22.6008	44.4471	3155.85	3155.85		3.83435	42.9725	164.771	7080.63	0.445702	0.445702	0.144829	20509.6
							3.93927	2.25709	1.62854	0.541369	1.56133	22.1688	36.1028	15.9953	26.0491	7146.59		17.4286	21.3678	25.3071	23.478	2.11016	1	1		21.9965	13.5068	30.4861	1293.62	1293.62		3.54256	42.5757	150.827	6421.57	0.201449	0.201449	0.0695565	8933.24
							5.27821	2.11529	1.55765	0.503488	1.58436	41.3846	64.4626	30.4746	47.4686	32574.8		15.381	20.6592	25.9374	20.2319	0.42733	1	1		47.3128	30.3745	64.251	6131.12	6131.12		2.78992	42.6535	119	5075.76			0.401108	40718.6
							4.68913	1.84542	1.42271	0.723325	1.66046	22.2787	31.6961	17.1756	24.4358	8019.71		17.8853	22.5745	27.2636	22.711	0.136481	1	1		24.4255	17.1683	31.6826	1708.83	1708.83		1.97186	47.5172	93.6973	4452.23	0.383814	0.383814	0.11258	10024.6
							4.55726	2.28137	1.64069	0.616031	1.67596	28.6138	46.9463	20.5781	33.7622	13831.2		18.2735	22.8307	27.388	19.8711	2.95959	1	1		25.6737	15.6481	35.6992	1754.97	1754.97		3.63725	40.4909	147.276	5963.33	0.294294	0.294294	0.144961	17289
							5.04971	2.12229	1.56115	0.697985	1.61804	24.5795	38.3722	18.0806	28.2264	11006.4		18.4971	23.5468	28.5965	23.6255	0.078714	1	1		28.223	18.0784	38.3676	2179.08	2179.08		2.59534	47.4744	123.212	5849.44	0.372528	0.372528	0.117601	13758
							5.19741	2.29981	1.64991	0.732726	1.55532	21.0541	34.7373	15.1044	24.9209	8567.16		17.443	22.6404	27.8378	26.0276	3.38716	1	1		18.9019	11.4563	26.3474	948.273	948.273		4.70849	40.3643	190.055	7671.42	0.123611	0.123611	0.0697977	10708.9
							5.04111	2.29431	1.64716	0.617409	1.70763	36.0809	59.431	25.9036	42.6673	24380.9		17.1118	22.153	27.1941	20.2434	1.90961	1	1		39.4875	23.9731	55.0019	4142.41	4142.41		2.1142	47.0201	99.4096	4674.24			0.326	30476.1
							5.00249	1.99396	1.49698	0.817517	1.70276	21.8545	32.7158	16.4074	24.5616	8435.93		17.6824	22.6849	27.6874	21.5484	1.13647	1	1		23.9194	15.9784	31.8603	1599.31	1599.31		3.12562	41.8306	130.746	5469.2	0.292422	0.292422	0.0964026	10544.9
							5.19951	2.33341	1.66671	0.666899	1.5529	24.2683	40.4481	17.3343	28.8912	11452.9		19.495	24.6945	29.894	17.7643	6.93028	0	0		#NUM!	#NUM!	#NUM!	#NUM!			1.90721	45.4984	86.7749	3948.12	#VALUE!		0.181303	14316.1
							4.17049	1.8152	1.4076	0.619866	1.54779	19.1159	26.9075	14.8235	20.8655	5225.89		20.2067	24.3772	28.5477	22.5889	1.78835	1	1		18.8498	13.3914	24.3081	1022.65	1022.65		2.66617	46.0121	122.676	5644.57	0.181175	0.181175	0.0578642	6532.36
							4.92604	2.66506	1.83253	0.534807	1.63877	38.0424	69.714	26.1585	47.9362	28221.5		18.5521	23.4782	28.4042	23.8198	0.341665	1	1		47.8208	26.0955	69.5461	5701.48	5701.48		3.26936	41.6789	136.263	5679.31			0.310574	35276.9
							5.0391	1.69875	1.34937	0.614031	1.51508	24.2678	32.7463	19.2767	26.0115	9993.04		19.8763	24.9154	29.9545	25.8212	0.905828	1	1		25.5878	18.9627	32.2128	1919.02	1919.02		4.65429	45.6373	212.409	9693.77	0.197964	0.197964	0.0644296	12491.3
							4.34275	1.8071	1.40355	0.574137	1.51886	21.6121	30.3337	16.7858	23.5598	6946.78		19.5117	23.8544	28.1972	21.3826	2.47187	1	1		19.3709	13.8014	24.9405	1081.38	1081.38		3.43504	47.1322	161.901	7630.73	0.141713	0.141713	0.056898	8683.47
							4.58674	2.38227	1.69114	0.542837	1.63538	32.7891	55.4508	23.2764	39.3636	18598.5		18.634	23.2207	27.8075	19.7159	3.50486	1	1		25.392	15.0148	35.7693	1687.25	1687.25		2.03288	42.2482	85.8856	3628.51	0.464996	0.464996	0.320353	23248.1
							5.09803	2.11245	1.55623	0.534283	1.47235	27.6925	43.0958	20.4008	31.7483	14081		17.7142	22.8122	27.9102	25.2965	2.4843	1	1		27.7236	17.8146	37.6326	2106.16	2106.16		3.34954	38.3748	128.538	4932.61	0.426987	0.426987	0.178418	17601.3
							4.62322	2.4156	1.7078	0.703517	1.66276	22.8871	39.0867	16.1809	27.6338	9186		17.4277	22.0509	26.6742	20.4419	1.60905	1	1		25.9062	15.1693	36.643	1746.25	1746.25		2.89356	42.6744	123.481	5269.47	0.33139	0.33139	0.108953	11482.5
							4.50234	2.06404	1.53202	0.702005	1.59008	19.2022	29.4181	14.2527	21.8354	5930.61		18.1224	22.6248	27.1271	23.408	0.783229	1	1		21.5025	14.0354	28.9695	1277.37	1277.37		4.3126	37.2034	160.443	5969.04	0.213998	0.213998	0.0620976	7413.27
							5.66508	1.86531	1.43265	0.540119	1.481	32.4851	46.5399	24.9502	35.7451	20666		17.378	23.0431	28.7082	24.439	1.39587	1	1		34.643	24.181	45.105	3426.49	3426.49		2.69377	47.6344	128.316	6112.28	0.560591	0.560591	0.211317	25832.5
							4.63384	1.72719	1.36359	0.590671	1.72911	35.2254	48.0332	27.8101	37.9216	19446.2		21.113	25.7468	30.3807	21.1342	4.61267	1	1		3.62073	2.65529	4.58618	38.2571	38.2571		3.31477	45.0394	149.295	6724.15	0.00568951	0.00568951	0.180749	24307.7
							4.03295	1.92402	1.46201	0.599593	1.5599	19.5538	28.5878	14.8584	21.7231	5381.77		17.3488	21.3818	25.4147	22.4459	1.06407	1	1		20.9534	14.3319	27.5748	1241.55	1241.55		3.14682	42.2112	132.831	5606.96	0.221431	0.221431	0.0599898	6727.21
							5.13323	2.35257	1.67628	0.676717	1.5626	23.7173	39.7569	16.8994	28.3282	10834.9		20.9132	26.0465	31.1797	23.6269	2.41954	1	1		24.984	14.9044	35.0635	1641.8	1641.8		2.37193	43.4612	103.087	4480.29	0.366449	0.366449	0.151147	13543.6
							4.55779	1.748	1.374	0.641569	1.51212	19.3903	26.6423	15.2416	20.9419	5814.41		19.8322	24.39	28.9478	24.8616	0.471541	1	1		20.8295	15.1598	26.4993	1262.05	1262.05		2.93035	46.6612	136.734	6380.16	0.197809	0.197809	0.056958	7268.02
							4.66347	1.93547	1.46774	0.731742	1.69742	23.1913	34.0388	17.5868	25.8128	8770.42		18.1688	22.8323	27.4958	21.1141	1.71822	1	1		23.9969	16.3496	31.6442	1625.36	1625.36		3.38538	41.297	139.806	5773.57	0.281518	0.281518	0.0949415	10963
							4.74232	2.30472	1.65236	0.659731	1.44691	17.3563	28.6788	12.4435	20.5611	5316.72		16.6092	21.3515	26.0938	23.511	2.15949	1	1		18.3057	11.0785	25.5328	888.649	888.649		3.82556	47.0575	180.021	8471.35	0.104901	0.104901	0.0392258	6645.9
							5.0975	2.11205	1.55603	0.667702	1.56477	24.0623	37.4416	17.7276	27.5846	10629.4		16.5023	21.5998	26.6973	22.4672	0.867399	1	1		27.1823	17.469	36.8956	2024.85	2024.85		2.8069	43.8402	123.055	5394.75	0.375337	0.375337	0.123146	13286.8
							5.18825	2.24245	1.62122	0.591987	1.53479	27.9805	45.3627	20.2291	32.7959	14957.1		16.772	21.9602	27.1484	24.6989	2.73866	1	1		27.8546	17.1813	38.528	2079.61	2079.61		3.55719	41.3609	147.129	6085.37	0.341739	0.341739	0.153617	18696.3
							4.92892	2.00074	1.50037	0.61583	1.7125	35.2277	52.8545	26.4175	39.636	21621		18.0235	22.9524	27.8813	20.329	2.62339	1	1		33.5555	22.3648	44.7461	3143.91	3143.91		2.56497	44.1345	113.204	4996.19	0.629262	0.629262	0.270468	27026.2
							5.0763	2.242	1.621	0.604521	1.76919	43.1488	69.9442	31.1972	50.5707	34798.9		17.0373	22.1136	27.1899	22.5401	0.426484	1	1		50.3919	31.0869	69.6969	6806.77	6806.77		2.1329	44.1426	94.1516	4156.09			0.523311	43498.6
							3.90268	2.05792	1.52896	0.589947	1.92237	37.7921	57.7826	28.0781	42.9304	19892		20.8785	24.7811	28.6838	23.1146	1.66656	1	1		38.8193	25.3893	52.2492	4167.55	4167.55		3.57873	46.9392	167.983	7884.97	0.528543	0.528543	0.157673	24865
							4.3366	2.06739	1.5337	0.658937	1.50368	17.0009	26.0743	12.6122	19.3432	4480.24		17.3436	21.6802	26.0168	22.9324	1.25226	1	1		18.5192	12.0749	24.9635	946.974	946.974		4.05279	40.6708	164.83	6703.78	0.14126	0.14126	0.0417697	5600.3
							4.99145	1.96126	1.48063	0.616312	1.56917	26.6363	39.4385	20.1087	29.7736	12436		19.4639	24.4553	29.4468	23.1771	1.27816	1	1		28.7809	19.4383	38.1235	2328.09	2328.09		2.88594	42.0721	121.418	5108.29	0.455748	0.455748	0.152155	15545
							5.85667	2.44858	1.72429	0.780598	1.69716	30.5772	52.7239	21.5325	37.1282	20888.2		16.4969	22.3536	28.2102	21.9267	0.426831	1	1		37.0295	21.4752	52.5837	3547.63	3547.63		2.59105	42.4939	110.104	4678.75	0.758243	0.758243	0.279031	26110.3
							5.89547	1.82756	1.41378	0.630623	1.47045	26.7572	37.8288	20.6991	29.2639	14502.5		15.5906	21.4861	27.3816	24.7884	3.30233	1	1		24.242	17.147	31.3371	1688.09	1688.09		4.13237	40.2394	166.284	6691.18	0.252286	0.252286	0.135462	18128.1
							4.74081	2.0706	1.5353	0.645386	1.74056	32.1652	49.3831	23.8497	36.6164	17541.4		17.229	21.9698	26.7106	25.9961	4.02623	1	1		19.3319	12.5916	26.0722	1031.36	1031.36		3.12358	46.4314	145.032	6734.07	0.153155	0.153155	0.162804	21926.7
							5.12115	2.06263	1.53131	0.67859	1.51377	21.3171	32.6432	15.826	24.2346	8311.54		20.007	25.1282	30.2494	19.2983	5.8299	0	0		#NUM!	#NUM!	#NUM!	#NUM!			4.4644	44.555	198.911	8862.47	#VALUE!		0.0586147	10389.4
							4.70401	2.70829	1.85415	0.650112	1.57626	22.6342	41.9672	15.4958	28.7315	9610.42		15.6975	20.4015	25.1055	22.2729	1.87136	1	1		26.3601	14.2168	38.5033	1719.69	1719.69		2.89504	40.7012	117.831	4795.87	0.358577	0.358577	0.125243	12013
							4.8347	2.04952	1.52476	0.538899	1.5125	27.6185	42.1116	20.547	31.3293	13142.2		18.0668	22.9015	27.7362	23.4753	0.573786	1	1		31.1079	20.4018	41.8139	2680.03	2680.03		2.37363	45.1109	107.076	4830.31	0.554836	0.554836	0.170049	16427.8
							4.25388	2.35091	1.67545	0.654331	1.77688	27.8342	46.6349	19.837	33.236	12362.9		18.8091	23.063	27.3169	17.7795	5.28345	0	0		#NUM!	#NUM!	#NUM!	#NUM!			2.46397	44.153	108.791	4803.47	#VALUE!		0.160859	15453.7
							3.90777	2.23493	1.61746	0.754702	1.65719	15.2578	24.6789	11.0424	17.8606	3345.55		17.3304	21.2382	25.1459	20.7496	0.488593	1	1		17.7205	10.9557	24.4852	842.743	842.743		5.01208	41.6023	208.514	8674.69	0.0971497	0.0971497	0.0241042	4181.93
							4.32664	1.98735	1.49368	0.643024	1.75445	28.35	42.3458	21.3076	31.8267	12264.4		19.0389	23.3656	27.6922	19.9213	3.44423	1	1		19.2625	12.896	25.6289	1038.33	1038.33		4.04189	49.1055	198.479	9746.41	0.106535	0.106535	0.078647	15330.5
							5.28557	2.15929	1.57965	0.638234	1.63473	31.6857	50.0522	23.1799	36.6161	19265.4		20.5266	25.8122	31.0978	20.5064	5.30578	0	1		#NUM!	#NUM!	#NUM!	#NUM!			2.98605	45.1385	134.786	6084.03	#VALUE!		0.197909	24081.7
							4.80129	2.25003	1.62502	0.667793	1.63842	25.3312	41.1636	18.2947	29.7292	11359.2		20.734	25.5353	30.3366	22.95	2.58531	1	1		25.0513	15.416	34.6866	1679.9	1679.9		2.74865	42.4606	116.709	4955.55	0.338994	0.338994	0.143263	14199
							4.08156	2.15057	1.57529	0.623896	1.51849	17.3242	27.2907	12.6899	19.9903	4440.69		17.1575	21.239	25.3206	26.5718	5.33273	1	0		#NUM!	#NUM!	#NUM!	#NUM!			3.19398	37.7252	120.494	4545.65	#VALUE!		0.0610567	5550.86
							4.76718	2.92232	1.96116	0.683099	1.71733	28.1219	55.1516	18.8725	37.0121	15588.3		18.8957	23.6628	28.43	24.1031	0.44022	1	1		36.8539	18.7919	54.916	3242.04	3242.04		1.88605	45.0298	84.9286	3824.32	0.847744	0.847744	0.254756	19485.4
							4.83172	2.78605	1.89302	0.628351	1.80563	39.7748	75.2946	27.0256	51.1601	30888.1		18.4988	23.3305	28.1622	23.8385	0.507984	1	1		50.8766	26.8758	74.8773	6322.1	6322.1		2.36443	46.3491	109.589	5079.36			0.380069	38610.1
							5.76828	1.60826	1.30413	0.562399	1.61362	42.7926	55.8072	34.7003	45.2537	35092.9		18.9908	24.7591	30.5274	22.6459	2.11325	1	1		42.1074	32.2877	51.9272	5267.22	5267.22		2.35609	45.3526	106.855	4846.15			0.452587	43866.1
							4.04713	2.59233	1.79617	0.656842	1.5837	17.8086	31.9872	12.3392	22.1632	5018.31		16.6213	20.6684	24.7155	24.2278	3.55941	1	1		10.5478	5.87242	15.2232	280.85	280.85		2.64271	45.602	120.513	5495.63	0.0511042	0.0511042	0.0570716	6272.89
							5.03477	2.10325	1.55162	0.632572	1.68529	32.9782	51.1697	24.3289	37.7493	19690.9		19.1392	24.174	29.2088	22.6286	1.54541	1	1		35.927	23.1545	48.6995	3542.5	3542.5		2.71608	46.6787	126.783	5918.05	0.598591	0.598591	0.207953	24613.6
							4.07328	2.56603	1.78301	0.656576	1.56676	17.4544	31.1214	12.1282	21.6248	4830.04		16.5555	20.6287	24.702	23.2601	2.63133	1	1		16.5071	9.25797	23.7562	690.943	690.943		3.76312	46.351	174.425	8084.76	0.0854624	0.0854624	0.0373391	6037.55
							4.23205	1.97131	1.48565	0.620442	1.66993	24.6873	36.6767	18.6053	27.641	9072.5		19.3161	23.5481	27.7802	20.155	3.39317	1	1		16.5188	11.1189	21.9187	765.642	765.642		2.1979	47.1292	103.585	4881.89	0.156833	0.156833	0.11615	11340.6
							4.59869	1.75105	1.37553	0.655798	1.63551	24.1781	33.2576	18.9929	26.1252	9125.69		19.0709	23.6696	28.2683	22.4724	1.19719	1	1		25.2244	18.338	32.1108	1849.92	1849.92		2.90786	45.6474	132.736	6059.06	0.305315	0.305315	0.0941327	11407.1
							4.25975	2.25836	1.62918	0.717618	1.56368	16.1992	26.3914	11.6861	19.0388	4127.31		16.4024	20.6622	24.9219	23.8589	3.19675	1	1		12.5831	7.7236	17.4426	423.235	423.235		4.50258	46.8604	210.993	9887.19	0.0428064	0.0428064	0.02609	5159.14
							4.66056	2.54357	1.77179	0.705618	1.48407	16.4719	29.1847	11.4739	20.3293	4902.92		18.2789	22.9394	27.6	21.1824	1.757	1	1		18.8293	10.6273	27.0313	902.487	902.487		2.27886	47.9849	109.351	5247.19	0.171994	0.171994	0.0583994	6128.65
							4.60358	2.34302	1.67151	0.545138	1.53245	26.2997	43.9602	18.7622	31.3612	11928.6		18.0188	22.6224	27.226	25.8011	3.17874	1	1		22.6848	13.5714	31.7981	1355.74	1355.74		3.23742	46.4725	150.451	6991.85	0.193903	0.193903	0.106629	14910.7
							5.11794	1.61814	1.30907	0.594543	1.65659	35.3808	46.3161	28.623	37.4695	21315.3		20.2213	25.3392	30.4572	18.6288	6.71045	0	0		#NUM!	#NUM!	#NUM!	#NUM!			3.41627	41.0741	140.321	5763.54	#VALUE!		0.231144	26644.1
							4.9151	2.17669	1.58834	0.761875	1.67628	22.7612	36.1527	16.609	26.3808	9271.84		16.3922	21.3073	26.2224	22.6077	1.30041	1	1		25.4408	16.0172	34.8644	1754.35	1754.35		2.75702	40.2502	110.97	4466.58	0.392774	0.392774	0.129739	11589.8
							5.16467	2.40535	1.70268	0.641208	1.53091	24.3822	41.5151	17.2594	29.3873	11625.8		20.5495	25.7142	30.8789	23.1176	2.59661	1	1		25.403	14.9195	35.8866	1682.04	1682.04		2.42542	44.4303	107.762	4787.91	0.351309	0.351309	0.15176	14532.3
							4.79552	2.41725	1.70862	0.659479	1.54505	21.442	36.6364	15.1562	25.8963	8365.46		16.2648	21.0604	25.8559	24.9004	3.84007	1	1		15.5114	9.07831	21.9445	625.866	625.866		3.90491	40.6831	158.864	6463.08	0.096837	0.096837	0.0808966	10456.8
							5.70006	2.55471	1.77736	0.66865	1.52825	26.4431	46.9987	18.3969	32.6978	15483.2		17.8623	23.5623	29.2624	23.8855	0.323184	1	1		32.6452	18.3673	46.9231	2707.58	2707.58		3.63376	44.7775	162.711	7285.78	0.371626	0.371626	0.13282	19354
							3.79375	2.35353	1.67677	0.667801	1.48954	13.2966	22.2952	9.47309	15.8842	2517.23		16.6463	20.44	24.2338	25.6466	5.20658	1	0		#NUM!	#NUM!	#NUM!	#NUM!			5.29445	48.3454	255.962	12374.6	#VALUE!		0.0127137	3146.53
							3.74364	2.44483	1.72241	0.662318	1.57007	15.1722	26.1328	10.689	18.4109	3285.25		20.6941	24.4378	28.1814	21.8138	2.62392	1	1		13.1318	7.62404	18.6395	446.446	446.446		2.57857	42.6909	110.081	4699.47	0.0949991	0.0949991	0.0436917	4106.56
							5.4275	2.54197	1.77098	0.682395	1.54473	24.611	43.5858	17.1465	30.3661	12742.9		17.9368	23.3643	28.7918	21.4845	1.87973	1	1		28.4868	16.0853	40.8883	2066.23	2066.23		2.58839	43.4596	112.49	4888.78	0.422646	0.422646	0.16291	15928.7
							4.38648	1.92453	1.46227	0.635341	1.61157	22.5053	32.9088	17.0996	25.0042	7754.7		17.7652	22.1517	26.5382	22.2987	0.146986	1	1		24.9902	17.09	32.8903	1765.88	1765.88		3.79476	44.7288	169.735	7592.03	0.232596	0.232596	0.0638392	9693.38
							5.83258	1.65813	1.32907	0.703275	1.89656	55.2634	73.4487	44.296	58.8724	59615.6		17.5696	23.4022	29.2348	25.5473	2.14507	1	1		54.7463	41.1916	68.3011	8838.65	8838.65		4.08685	44.0262	179.928	7921.56			0.470358	74519.4
							3.93542	2.78276	1.89138	0.597054	1.63083	21.6578	40.9632	14.7203	27.8418	7455.08		15.6183	19.5537	23.4891	18.8569	0.696846	1	1		27.4018	14.4877	40.3159	1834.96	1834.96		2.57911	47.2123	121.766	5748.85	0.319188	0.319188	0.0810497	9318.84
							4.91142	2.23048	1.61524	0.546038	1.41093	22.182	35.8294	16.0635	25.9464	8880.47		18.9766	23.8881	28.7995	19.0716	4.81646	1	1		5.07747	3.14348	7.01147	69.2419	69.2419		3.85167	40.1865	154.785	6220.25	0.0111317	0.0111317	0.0892294	11100.6
							5.27555	1.95251	1.47625	0.60897	1.51772	26.4926	39.1097	20.0305	29.5701	12983.6		16.4204	21.6959	26.9714	16.689	5.00687	1	1		9.3164	6.31085	12.322	244.297	244.297		3.54752	43.8593	155.592	6824.15	0.0357988	0.0357988	0.118912	16229.5
							4.1099	2.09403	1.54702	0.712784	1.66391	18.4511	28.5441	13.6312	21.0876	5023.79		16.9765	21.0864	25.1963	23.8923	2.80582	1	1		15.4088	9.96031	20.8572	652.648	652.648		3.65592	43.4402	158.814	6898.89	0.0946019	0.0946019	0.0455127	6279.74
							4.88211	1.82394	1.41197	0.58509	1.70395	37.153	52.4589	28.7613	40.6101	23141.1		19.3812	24.2634	29.1455	23.4148	0.848558	1	1		39.992	28.3235	51.6604	4596.79	4596.79		4.05578	41.3475	167.697	6933.84	0.66295	0.66295	0.208589	28926.4
							4.81735	1.98519	1.4926	0.673211	1.74592	31.0572	46.3559	23.3509	34.8534	16382		16.9612	21.7785	26.5959	23.2366	1.45808	1	1		33.2186	22.2556	44.1816	3089.08	3089.08		2.62727	43.3233	113.822	4931.16	0.626442	0.626442	0.207633	20477.5
							4.86258	2.02481	1.51241	0.601072	1.59712	28.1898	42.6345	21.056	31.8452	13713.7		18.8094	23.6719	28.5345	22.3757	1.29621	1	1		30.6929	20.2941	41.0918	2619.84	2619.84		3.80034	39.0256	148.311	5787.91	0.45264	0.45264	0.148085	17142.1
							5.04493	2.37477	1.68739	0.689982	1.60657	24.4403	41.2403	17.366	29.3031	11350.8		16.2178	21.2628	26.3077	21.6841	0.42137	1	1		29.2008	17.3053	41.0962	2234.25	2234.25		1.93561	48.1973	93.2913	4496.39	0.496898	0.496898	0.157777	14188.5
							5.02581	2.61089	1.80544	0.655318	1.64855	28.7449	51.8973	19.8772	35.8873	16287.6		19.1498	24.1756	29.2015	19.1372	5.03841	0	1		#NUM!	#NUM!	#NUM!	#NUM!			2.81334	46.1302	129.78	5986.77	#VALUE!		0.170037	20359.5
							4.31995	1.79473	1.39736	0.665063	1.49357	16.3567	22.8563	12.7352	17.7958	3950.4		18.4204	22.7403	27.0603	23.4017	0.661325	1	1		17.586	12.5851	22.5869	893.024	893.024		3.64343	44.1808	160.97	7111.78	0.12557	0.12557	0.034717	4938
							5.23171	1.99289	1.49644	0.803067	1.50848	16.8942	25.2812	12.6857	18.9835	5271.18		17.694	22.9257	28.1574	21.5765	1.34916	1	1		18.3414	12.2567	24.4261	940.539	940.539		2.54249	43.3403	110.192	4775.76	0.19694	0.19694	0.0689835	6588.97
							5.56194	1.68141	1.34071	0.690814	1.56656	26.2478	35.1906	20.9292	28.0599	12869.3		18.7158	24.2778	29.8397	22.0341	2.24367	1	1		25.6755	19.1508	32.2003	1937.3	1937.3		3.18939	40.761	130.003	5299.03	0.365594	0.365594	0.151789	16086.7
							4.88264	2.24633	1.62316	0.672571	1.63727	25.6777	41.6791	18.5543	30.1167	11862.3		16.0268	20.9094	25.7921	20.0206	0.888862	1	1		29.6135	18.2443	40.9827	2348.97	2348.97		3.69621	46.1925	170.737	7886.77	0.297836	0.297836	0.0940045	14827.8
							4.72855	1.7886	1.3943	0.624833	1.56363	23.6798	33.0168	18.4596	25.7382	9053.87		17.3535	22.0821	26.8106	21.1483	0.933836	1	1		25.2313	18.096	32.3665	1840.05	1840.05		4.95916	44.6258	221.307	9875.99	0.186315	0.186315	0.0572972	11317.3
							5.12205	1.95055	1.47528	0.545544	1.6335	38.7942	57.2322	29.3415	43.2869	27021.9		17.1101	22.2322	27.3542	25.0784	2.84623	1	1		35.9884	24.3944	47.5825	3646.59	3646.59		3.21131	40.3601	129.609	5231.01	0.697109	0.697109	0.322857	33777.4
							4.73337	2.34901	1.6745	0.657571	1.64697	25.8126	43.2232	18.4007	30.8119	11826.9		19.7928	24.5262	29.2595	25.7967	1.27053	1	1		29.6812	17.7254	41.637	2318.6	2318.6		2.44681	37.859	92.6336	3507.02	0.661131	0.661131	0.210772	14783.6
							4.93743	2.21778	1.60889	0.650914	1.74967	34.647	55.7431	25.1347	40.4389	21732.8		15.659	20.5965	25.5339	21.3096	0.713148	1	1		40.0148	24.8711	55.1586	4309.81	4309.81		4.16309	40.2679	167.639	6750.45	0.638448	0.638448	0.201216	27165.9
							4.98659	1.78757	1.39379	0.79045	1.45585	14.6076	20.3598	11.3896	15.8747	3632.77		17.7463	22.7329	27.7195	20.6854	2.04746	1	1		14.4749	10.3853	18.5645	605.691	605.691		2.59635	42.8732	111.314	4772.38	0.126916	0.126916	0.0475754	4540.96
							4.51447	2.66129	1.83065	0.719483	1.60469	19.0493	34.8724	13.1036	23.988	6480.8		19.2805	23.7949	28.3094	24.6642	0.869285	1	1		23.5391	12.8584	34.2198	1382.34	1382.34		2.1808	42.7373	93.2015	3983.18	0.347043	0.347043	0.10169	8101
							5.04398	1.85907	1.42953	0.647564	1.63715	28.8072	41.1808	22.1513	31.6661	14455		19.8913	24.9353	29.9793	21.9884	2.94691	1	1		25.6995	17.9775	33.4215	1887.58	1887.58		3.03214	46.0378	139.593	6426.58	0.293715	0.293715	0.140578	18068.7
							6.04726	1.64346	1.32173	0.594396	1.62383	43.2492	57.1638	34.7826	45.9732	37773.8		19.7916	25.8389	31.8861	20.1788	5.66004	1	1		16.1865	12.2464	20.1265	774.332	774.332		2.51843	45.8467	115.462	5293.54	0.146279	0.146279	0.44599	47217.3
							5.82035	1.94215	1.47108	0.627833	1.70272	44.3313	65.2147	33.5786	49.3967	40041.2		18.9678	24.7881	30.6085	24.1556	0.632528	1	1		49.1041	33.3797	64.8285	6798.27	6798.27		2.78468	45.1002	125.59	5664.11			0.44183	50051.5
							5.13609	1.9888	1.4944	0.692299	1.49389	19.9616	29.8305	14.9993	22.4149	7219.61		20.1897	25.3257	30.4618	23.586	1.73977	1	1		21.0898	14.1126	28.067	1244.38	1244.38		3.80546	40.1335	152.727	6129.46	0.203016	0.203016	0.0736159	9024.51
							4.26799	2.09118	1.54559	0.551046	1.5341	23.1135	35.7239	17.0832	26.4036	8182.8		19.3981	23.6661	27.9341	20.5208	3.14522	1	1		17.8479	11.5477	24.1482	876.05	876.05		1.86379	41.8126	77.9299	3258.45	0.268855	0.268855	0.156953	10228.5
							4.92253	2.28587	1.64294	0.641333	1.50524	21.4929	35.3115	15.4477	25.3796	8435.66		16.7179	21.6404	26.563	25.0337	3.39328	1	1		18.386	11.191	25.5811	899.368	899.368		3.08951	48.7981	150.762	7356.92	0.122248	0.122248	0.0716643	10544.6
							3.77174	2.3948	1.6974	0.725725	1.59843	13.935	23.6533	9.87695	16.7651	2768.26		18.4939	22.2656	26.0374	23.9614	1.69581	1	1		14.9751	8.82235	21.1278	585.582	585.582		2.07048	40.1518	83.1334	3337.95	0.175431	0.175431	0.051833	3460.33
							5.601	2.31723	1.65861	0.614662	1.55721	31.2139	51.7718	22.3421	37.057	20353.2		16.7218	22.3228	27.9238	23.8225	1.49971	1	1		35.7039	21.5263	49.8814	3373.33	3373.33		2.71531	41.2134	111.907	4612.06	0.731415	0.731415	0.275815	25441.5
							4.66311	1.7092	1.3546	0.662502	1.72422	28.924	39.1805	22.9233	31.0519	13157.5		20.0533	24.7164	29.3795	23.5803	1.13614	1	1		30.1161	22.2325	37.9997	2654.11	2654.11		3.86708	45.8857	177.444	8142.13	0.325972	0.325972	0.100998	16446.8
							3.93482	2.57899	1.78949	0.663777	1.45611	13.3486	23.8872	9.26223	16.5747	2734.98		17.179	21.1138	25.0486	19.3125	1.80128	1	1		14.736	8.23473	21.2372	549.411	549.411		5.17837	41.163	213.157	8774.21	0.0626165	0.0626165	0.0194817	3418.73
							4.52742	2.14665	1.57332	0.705608	1.66188	21.9592	34.5488	16.0943	25.3216	7908.73		18.5108	23.0382	27.5656	21.7329	1.30528	1	1		24.2464	15.4109	33.0818	1601.65	1601.65		5.17129	46.0126	237.945	10948.5	0.14629	0.14629	0.0451475	9885.92
							5.18925	2.02282	1.51141	0.797939	1.65534	22.1828	33.5273	16.5745	25.0509	9059.27		19.328	24.5172	29.7065	23.0494	1.46782	1	1		24.0279	15.8976	32.1581	1606.1	1606.1		1.99868	48.0636	96.0641	4617.19	0.347852	0.347852	0.12263	11324.1
							4.23136	2.62278	1.81139	0.601112	1.50754	18.953	34.3313	13.0897	23.7105	5973.77		18.8818	23.1131	27.3445	23.8395	0.726321	1	1		23.3586	12.8954	33.8217	1370.19	1370.19		2.4967	47.0336	117.429	5523.1	0.248083	0.248083	0.0675999	7467.21
							4.84358	2.15866	1.57933	0.645393	1.83074	40.0428	63.2408	29.2963	46.2685	28192		17.4867	22.3302	27.1738	24.3644	2.03413	1	1		41.9906	26.5876	57.3936	4793.93	4793.93		2.54725	43.6131	111.094	4845.13			0.363664	35240
							5.51708	2.79268	1.89634	0.647111	1.53964	27.1012	51.3931	18.4028	34.8979	16392.6		17.6084	23.1255	28.6426	24.5055	1.38005	1	1		33.7885	17.8177	49.7593	2785.33	2785.33		2.92799	41.9605	122.86	5155.26	0.540289	0.540289	0.198736	20490.7
							4.78816	2.34319	1.6716	0.64624	1.60577	24.9261	41.6663	17.7819	29.7241	11145		20.6146	25.4028	30.1909	25.1177	0.285071	1	1		29.6714	17.7503	41.5924	2319.37	2319.37		2.74352	42.1839	115.733	4882.05	0.475082	0.475082	0.142679	13931.3
							4.2894	2.46179	1.7309	0.624732	1.75818	29.5853	51.2091	20.8015	36.0053	14354.5		17.0874	21.3768	25.6662	25.4901	4.1133	1	1		10.2109	5.89918	14.5226	269.144	269.144		4.262	43.4195	185.054	8034.96	0.0334966	0.0334966	0.111657	17943.2
							4.79424	3.14564	2.07282	0.655594	1.75156	32.6213	67.618	21.4958	44.5569	21892		20.0742	24.8685	29.6627	20.2931	4.5754	1	1		13.3083	6.42038	20.1962	407.361	407.361		4.34073	41.8179	181.52	7590.78	0.0536653	0.0536653	0.180252	27365
							5.07488	1.93981	1.46991	0.604216	1.33805	17.2453	25.349	13.0678	19.2084	5281.26		20.0594	25.1343	30.2091	21.5165	3.61776	1	1		13.4706	9.16428	17.777	511.807	511.807		5.18543	43.1009	223.496	9632.89	0.0531312	0.0531312	0.0342658	6601.58
							5.13314	2.32716	1.66358	0.631879	1.53585	24.9596	41.5222	17.8424	29.6823	11947.3		18.4661	23.5993	28.7324	23.364	0.235262	1	1		29.6512	17.8237	41.4786	2322.59	2322.59		3.98508	42.3317	168.695	7141.17	0.325239	0.325239	0.104563	14934.1
							5.298	2.45897	1.72949	0.591056	1.62096	34.9894	60.5137	24.6093	42.5615	24786.5		18.0806	23.3786	28.6766	21.6365	1.74212	1	1		40.1947	23.2408	57.1485	4172.6	4172.6		3.09441	43.9765	136.082	5984.39	0.697246	0.697246	0.258866	30983.1
							5.12741	2.4958	1.7479	0.688666	1.71471	31.2633	54.6452	21.8948	38.27	19272.7		19.5863	24.7137	29.8411	21.4364	3.27729	1	1		29.4321	16.8386	42.0257	2223.15	2223.15		3.89068	43.7228	170.111	7437.74	0.298901	0.298901	0.16195	24090.8
							4.02242	2.23128	1.61564	0.582247	1.57278	20.9005	33.7678	15.1338	24.4508	6457.84		18.5269	22.5493	26.5717	20.2168	2.33252	1	1		19.9201	12.3295	27.5106	1065.61	1065.61		3.83974	38.7074	148.626	5752.94	0.185228	0.185228	0.070158	8072.29
							5.32476	2.35217	1.67609	0.665599	1.46609	21.0867	35.3431	15.0257	25.1844	8883.62		19.983	25.3078	30.6325	27.0404	1.73266	1	1		23.8138	14.208	33.4196	1491.71	1491.71		5.5707	46.778	260.586	12189.7	0.122374	0.122374	0.0455487	11104.5
							5.65736	1.93342	1.46671	0.723744	1.61149	27.4856	40.3134	20.8508	30.5821	14939.5		17.0446	22.7019	28.3593	24.6285	1.92657	1	1		28.7542	19.6045	37.9038	2334.48	2334.48		4.17907	40.1292	167.703	6729.77	0.346888	0.346888	0.138744	18674.3
							4.37495	2.8971	1.94855	0.603109	1.65403	26.5104	51.6569	17.8305	34.7437	12659.5		19.3688	23.7437	28.1187	22.4027	1.34102	1	1		33.0713	16.9722	49.1703	2621.76	2621.76		3.79402	38.1612	144.784	5525.15	0.474513	0.474513	0.143203	15824.4
							4.64447	1.64593	1.32297	0.660452	1.52903	19.7348	26.1085	15.8625	20.9855	6042.8		19.8638	24.5083	29.1528	17.4557	7.05255	0	0		#NUM!	#NUM!	#NUM!	#NUM!			3.87255	36.7063	142.147	5217.68	#VALUE!		0.0723836	7553.5
							4.60572	2.33887	1.66944	0.640963	1.50636	19.5049	32.5622	13.9222	23.2422	6559.46		16.2752	20.8809	25.4866	23.8473	2.96638	1	1		17.7796	10.6501	24.9091	833.414	833.414		3.31053	45.962	152.159	6993.53	0.119169	0.119169	0.0586209	8199.33
							4.15128	1.70966	1.35483	0.698184	1.86661	27.8709	37.7602	22.0864	29.9233	10876.6		16.7586	20.9099	25.0612	23.8341	2.92418	1	1		21.2396	15.677	26.8022	1320.02	1320.02		1.69136	41.0711	69.4658	2853.04	0.462674	0.462674	0.238268	13595.7
							5.3977	1.7669	1.38345	0.582729	1.64379	38.8254	53.713	30.3996	42.0563	27688.9		19.0084	24.4061	29.8038	19.4924	4.9137	1	1		17.406	12.5816	22.2305	878.689	878.689		2.90015	43.2784	125.514	5432.05	0.16176	0.16176	0.318582	34611.1
							5.08843	2.37264	1.68632	0.638679	1.56027	25.4842	42.9745	18.1125	30.5435	12442.9		17.6545	22.743	27.8314	21.0048	1.73817	1	1		28.7062	17.023	40.3895	2160	2160		2.0236	46.1343	93.3572	4306.97	0.501514	0.501514	0.180564	15553.7
							4.38979	2.3925	1.69625	0.811651	1.54546	13.5811	23.037	9.62883	16.3329	3059.09		20.3965	24.7862	29.176	24.5729	0.21332	1	1		16.3136	9.61745	23.0097	695.219	695.219		1.62907	40.2523	65.5738	2639.5	0.263391	0.263391	0.0724355	3823.86
							4.9362	2.53002	1.76501	0.615978	1.63366	29.9606	52.8807	20.9013	36.891	17140.1		16.2442	21.1804	26.1166	22.6186	1.43824	1	1		35.2904	19.9944	50.5863	3177.54	3177.54		3.29614	45.0935	148.634	6702.44	0.474088	0.474088	0.159831	21425.1
							5.04419	1.84203	1.42102	0.650129	1.38408	17.0428	24.218	13.1475	18.6828	5045.71		16.8346	21.8788	26.923	19.2562	2.62264	1	1		15.9589	11.2307	20.6872	729.889	729.889		3.08374	45.719	140.985	6445.71	0.113236	0.113236	0.0489251	6307.14
							4.76854	1.72133	1.36066	0.786768	1.55704	16.5364	22.5005	13.0716	17.7861	4406.13		21.1821	25.9506	30.7192	17.0548	8.89588	0	0		#NUM!	#NUM!	#NUM!	#NUM!			2.3075	43.3725	100.082	4340.8	#VALUE!		0.0634407	5507.67
							4.07008	2.06208	1.53104	0.544477	1.5967	24.8265	38.0104	18.433	28.2217	8958.86		18.0242	22.0943	26.1643	22.442	0.347743	1	1		28.1185	18.3656	37.8714	2185.08	2185.08		3.19012	46.2415	147.516	6821.37	0.320329	0.320329	0.0820845	11198.6
							3.81298	2.21318	1.60659	0.71587	1.73484	18.2071	29.2513	13.2169	21.2341	4631.15		16.8756	20.6886	24.5016	22.0454	1.35682	1	1		19.8442	12.3518	27.3367	1060.78	1060.78		2.15979	43.4813	93.9104	4083.35	0.259782	0.259782	0.0708846	5788.93
							3.98041	2.08052	1.54026	0.610194	1.63831	21.5944	33.2609	15.9869	24.6239	6649.3		16.8557	20.8361	24.8166	20.1085	0.727601	1	1		24.209	15.7175	32.7005	1614.69	1614.69		3.34878	39.7232	133.024	5284.15	0.305571	0.305571	0.0786467	8311.62
							4.92175	1.89378	1.44689	0.58685	1.54978	27.0003	39.0664	20.6288	29.8476	12460.8		20.8574	25.7791	30.7009	23.1439	2.63522	1	1		25.2088	17.4228	32.9949	1805.98	1805.98		5.30966	41.2554	219.052	9037.08	0.199841	0.199841	0.0861785	15576
							5.32194	1.96503	1.48252	0.741215	1.48951	18.8454	27.9386	14.2179	21.0783	6641.41		17.9306	23.2525	28.5745	20.6203	2.63223	1	1		18.3196	12.3571	24.282	942.651	942.651		3.75871	41.2081	154.889	6382.7	0.147688	0.147688	0.0650333	8301.76
							5.21821	2.2349	1.61745	0.624227	1.69423	36.5078	59.0496	26.4215	42.7356	25576.8		16.8482	22.0664	27.2846	18.2806	3.7858	1	1		29.4117	18.184	40.6394	2321.59	2321.59		3.00056	38.9709	116.935	4557.06	0.50945	0.50945	0.350786	31971
							4.96454	2.40496	1.70248	0.610892	1.5254	24.4335	41.5976	17.2966	29.4471	11221.7		19.3383	24.3028	29.2674	25.4948	1.19201	1	1		28.5857	16.7906	40.3807	2130.05	2130.05		2.25537	39.2476	88.518	3474.12	0.613119	0.613119	0.201879	14027.1
							4.3092	1.8355	1.41775	0.669843	1.71245	24.232	34.3548	18.7169	26.5359	8705		17.3111	21.6203	25.9295	23.317	1.69666	1	1		24.3925	17.2051	31.5799	1706.94	1706.94		2.8142	40.9063	115.118	4709.07	0.362479	0.362479	0.115535	10881.3
							5.10531	1.95874	1.47937	0.539289	1.65889	41.6302	61.5865	31.4419	46.5142	31057.5		16.6796	21.7849	26.8902	22.426	0.641131	1	1		46.146	31.1929	61.099	5987.43	5987.43		3.06268	43.8893	134.419	5899.57			0.329023	38821.8
							4.80072	2.16886	1.58443	0.668204	1.44319	17.2166	27.2785	12.5774	19.9279	5174.49		16.741	21.5417	26.3424	21.0338	0.507927	1	1		19.8161	12.5068	27.1254	1065.79	1065.79		3.09375	43.4176	134.323	5832	0.182749	0.182749	0.0554536	6468.11
							5.59751	1.84903	1.42452	0.658944	1.61904	31.9395	45.4983	24.6065	35.0524	19687.5		18.3595	23.957	29.5545	23.5043	0.452694	1	1		34.9376	24.5259	45.3492	3494.18	3494.18		2.60622	42.249	110.11	4652.06	0.751104	0.751104	0.2645	24609.4
							5.01083	2.08422	1.54211	0.695979	1.67008	27.0261	41.6772	19.9965	30.8369	13119.4		17.4233	22.4341	27.445	22.872	0.437841	1	1		30.7189	19.9201	41.5178	2598.21	2598.21		4.07453	42.0735	171.43	7212.65	0.36023	0.36023	0.113684	16399.2
							3.95142	1.82045	1.41023	0.762331	1.54372	12.681	17.8831	9.82346	13.8533	2180.78		16.8748	20.8262	24.7776	17.8986	2.92757	1	1		9.30423	6.59769	12.0108	248.95	248.95		2.37792	42.4444	100.929	4283.88	0.0581133	0.0581133	0.0318166	2725.97
							4.75995	2.16941	1.5847	0.710453	1.57685	20.0719	31.8079	14.662	23.235	6974		17.5117	22.2717	27.0316	19.8407	2.43096	1	1		19.9763	12.6057	27.3469	1082.99	1082.99		5.27308	48.1686	253.996	12234.6	0.0885186	0.0885186	0.0356263	8717.5
							5.5513	1.67721	1.3386	0.677395	1.70548	36.1451	48.3841	28.848	38.616	24342.3		16.3078	21.8591	27.4104	23.5235	1.66441	1	1		36.8395	27.5208	46.1581	3990.79	3990.79		3.51607	46.2327	162.557	7515.47	0.531011	0.531011	0.202435	30427.9
							5.35653	2.24163	1.62082	0.581038	1.57032	32.7229	53.0378	23.6604	38.3491	21117.4		17.1557	22.5123	27.8688	24.189	1.67677	1	1		36.4218	22.4712	50.3723	3556.05	3556.05		2.47428	40.0618	99.1238	3971.07			0.332363	26396.7
							4.54795	2.46865	1.73432	0.650574	1.62779	23.6972	41.0986	16.6482	28.8734	9775.99		16.7221	21.27	25.818	26.0552	4.78517	1	1		#NUM!	#NUM!	#NUM!	#NUM!			3.43501	44.329	152.271	6749.99	#VALUE!		0.0905186	12220
							4.60976	2.20397	1.60198	0.564559	1.51447	24.0521	38.531	17.4826	28.0068	9755.39		18.71	23.3198	27.9295	20.0129	3.30685	1	1		19.5125	12.1802	26.8447	1027.22	1027.22		3.48769	40.5983	141.594	5748.47	0.178694	0.178694	0.106065	12194.2
							4.71978	2.3489	1.67445	0.761964	1.52594	16.1631	27.0643	11.5221	19.2932	4623.82		19.1793	23.8991	28.6188	24.7916	0.892576	1	1		18.9451	11.3142	26.576	944.632	944.632		2.8788	41.9211	120.683	5059.15	0.186717	0.186717	0.057122	5779.78
							5.1619	2.61648	1.80824	0.743779	1.6318	23.6014	42.677	16.3109	29.4939	11288.3		18.2804	23.4423	28.6042	22.8879	0.554399	1	1		29.3233	16.2165	42.4302	2161.63	2161.63		2.2476	45.2438	101.69	4600.83	0.469836	0.469836	0.153347	14110.4
							4.44893	2.16668	1.58334	0.633894	1.57086	21.3463	33.7985	15.5992	24.6989	7368.96		17.0791	21.528	25.9769	24.3106	2.78262	1	1		19.2715	12.1714	26.3716	1008.39	1008.39		2.6247	48.3971	127.028	6147.77	0.164025	0.164025	0.0749149	9211.2
							3.80416	2.14442	1.57221	0.725496	1.64454	15.2563	23.9861	11.1854	17.5857	3206.4		18.2947	22.0989	25.903	23.0092	0.910303	1	1		17.0748	10.8604	23.2892	794.603	794.603		3.0758	41.61	127.984	5325.41	0.14921	0.14921	0.0376309	4008
							4.68259	2.43059	1.7153	0.696779	1.61556	21.7119	37.2423	15.3223	26.2823	8394.53		17.4357	22.1183	26.8008	24.2395	2.12121	1	1		23.431	13.66	33.2019	1424.83	1424.83		3.8247	44.2329	169.177	7483.2	0.190404	0.190404	0.0701115	10493.2
							4.5165	1.59558	1.29779	0.618796	1.56001	22.217	28.8329	18.0705	23.4517	7392.85		17.1412	21.6577	26.1742	18.6246	3.03305	1	1		17.3768	13.3895	21.364	898.666	898.666		4.53321	47.1067	213.545	10059.4	0.0893361	0.0893361	0.0459325	9241.06
							4.29972	1.60008	1.30004	0.679934	1.65105	21.011	27.3152	17.0711	22.1932	6298.79		17.8389	22.1386	26.4384	20.7293	1.40936	1	1		20.9671	16.128	25.8062	1307.54	1307.54		3.44792	45.8014	157.919	7232.92	0.180776	0.180776	0.0544281	7873.49
							4.8474	2.37754	1.68877	0.736396	1.65363	22.5593	38.0975	16.0239	27.0607	9296.58		19.4956	24.343	29.1904	24.5159	0.172885	1	1		27.0435	16.0137	38.0732	1915.41	1915.41		5.36933	38.5655	207.071	7985.8	0.239852	0.239852	0.0727587	11620.7
							4.05297	1.58988	1.29494	0.668971	1.46598	14.026	18.1628	11.4241	14.7935	2641.97		20.6518	24.7047	28.7577	17.6496	7.0551	0	0		#NUM!	#NUM!	#NUM!	#NUM!			3.35088	40.4425	135.518	5480.68	#VALUE!		0.0301282	3302.46
							5.42162	2.19199	1.59599	0.744139	1.63081	25.4996	40.6972	18.5664	29.6318	12869.8		18.5119	23.9335	29.3551	19.3424	4.59111	1	1		15.7608	9.87525	21.6464	671.56	671.56		3.47225	44.0238	152.861	6729.54	0.0997927	0.0997927	0.119527	16087.2
							5.28687	2.96425	1.98212	0.634491	1.62007	31.0255	61.4965	20.746	41.1212	21190.1		18.0325	23.3194	28.6063	21.1504	2.16895	1	1		37.5014	18.9198	56.0831	3333.49	3333.49		3.73875	47.6405	178.116	8485.5	0.392845	0.392845	0.156076	26487.7
							4.63519	1.84857	1.42429	0.530386	1.74535	43.9746	62.6323	33.8815	48.2569	30901.5		18.4436	23.0788	27.714	24.8518	1.77296	1	1		44.5872	31.305	57.8695	5691.32	5691.32		2.77122	44.2831	122.718	5434.33			0.355396	38626.8
							5.07859	2.0928	1.5464	0.599028	1.72131	39.6174	61.2644	29.2739	45.2692	28614.2		16.7741	21.8527	26.9313	24.9031	3.05039	1	1		36.1937	23.4051	48.9822	3601.63	3601.63		4.99518	45.8255	228.907	10489.8	0.343348	0.343348	0.170489	35767.7
							3.97332	1.73227	1.36613	0.726056	1.70119	18.0215	24.6198	14.2124	19.4161	4367.73		18.4247	22.398	26.3713	20.496	1.90205	1	1		17.0469	12.4782	21.6156	847.359	847.359		3.17779	44.2101	140.49	6211.09	0.136427	0.136427	0.0439509	5459.66
							4.59647	2.30973	1.65487	0.684048	1.72047	26.5099	43.8704	18.9937	31.4321	12032.5		17.8749	22.4714	27.0679	23.5803	1.10887	1	1		30.5037	18.4327	42.5747	2465.42	2465.42		4.28774	40.4248	173.331	7006.89	0.351857	0.351857	0.107327	15040.6
							4.69239	2.46758	1.73379	0.569912	1.50504	23.8778	41.399	16.7772	29.0881	10238.9		17.3533	22.0457	26.738	23.8459	1.80027	1	1		26.8621	15.4933	38.231	1860.84	1860.84		2.90772	38.6054	112.254	4333.61	0.429397	0.429397	0.147667	12798.6
							3.96757	1.77256	1.38628	0.560841	1.78181	32.6568	45.2716	25.5402	35.4059	14412		19.5579	23.5255	27.493	19.422	4.10352	0	1		#NUM!	#NUM!	#NUM!	#NUM!			1.95444	40.7768	79.6958	3249.74	#VALUE!		0.277176	18015
							5.81574	1.83961	1.41981	0.690416	1.49406	24.1402	34.2743	18.6313	26.4528	11667.2		16.5691	22.3849	28.2006	25.0737	2.68881	1	1		23.4559	16.5205	30.3913	1577.33	1577.33		3.35638	42.3871	142.268	6030.32	0.261566	0.261566	0.120922	14584
							4.50578	2.42628	1.71314	0.603059	1.54597	22.4008	38.3757	15.8167	27.0962	8591.95		17.5994	22.1052	26.611	22.7612	0.656006	1	1		26.8075	15.6482	37.9668	1866.45	1866.45		3.12012	42.7119	133.266	5692.05	0.327905	0.327905	0.0943415	10739.9
							4.71223	2.34984	1.67492	0.639183	1.53015	21.26	35.6089	15.1537	25.3813	7988.3		16.2824	20.9946	25.7069	19.3203	1.67433	1	1		23.7251	14.1649	33.2853	1481.21	1481.21		3.42618	39.155	134.152	5252.72	0.281988	0.281988	0.0950495	9985.37
							5.5377	1.97156	1.48578	0.67539	1.54167	25.6296	38.0799	19.3147	28.6973	12795.7		18.6036	24.1413	29.679	20.7612	3.38012	1	1		22.7313	15.2993	30.1634	1449.77	1449.77		3.13282	43.9704	137.751	6056.99	0.239356	0.239356	0.132034	15994.6
							4.61258	2.37247	1.68623	0.588463	1.73237	35.4099	59.7093	25.1676	42.4385	21776		17.5938	22.2064	26.8189	23.0474	0.841031	1	1		41.7271	24.7457	58.7084	4564.05	4564.05		3.0859	44.8719	138.47	6213.43	0.734546	0.734546	0.219042	27220
							3.7928	1.95678	1.47839	0.731392	1.63595	14.7704	21.8364	11.1593	16.4979	2903.55		18.4187	22.2115	26.0043	25.5546	3.3431	1	1		7.79215	5.27069	10.3136	170.776	170.776		2.79185	41.396	115.571	4784.2	0.0356959	0.0356959	0.0379315	3629.44
							4.47539	2.56415	1.78207	0.574394	1.77501	38.2508	68.1657	26.5842	47.375	25478.3		15.7112	20.1866	24.662	21.5342	1.3476	1	1		45.1762	25.3504	65.0021	5176.8	5176.8		2.34344	45.9699	107.728	4952.22			0.321551	31847.9
							5.01374	1.83038	1.41519	0.759392	1.77992	28.7736	40.7201	22.2468	31.4834	14268.8		19.2697	24.2834	29.2972	23.0246	1.25886	1	1		30.4749	21.5341	39.4157	2666.53	2666.53		3.32092	40.4012	134.169	5420.57	0.491927	0.491927	0.164521	17836
							4.25432	1.74861	1.37431	0.737535	1.58774	16.1564	22.2039	12.698	17.451	3768.29		17.9985	22.2529	26.5072	21.9575	0.29533	1	1		17.4089	12.6674	22.1503	881.489	881.489		4.57268	42.7517	195.49	8357.5	0.105473	0.105473	0.0281804	4710.36
							4.60079	1.96696	1.48348	0.717921	1.44806	14.7308	21.8529	11.11	16.4815	3509.18		18.069	22.6698	27.2706	25.7816	3.11181	1	1		12.1397	8.18327	16.0962	413.808	413.808		3.47051	43.099	149.575	6446.53	0.0641908	0.0641908	0.034022	4386.48
							4.11091	1.85094	1.42547	0.580246	1.55368	20.9475	29.8601	16.1324	22.9962	6221.25		17.9649	22.0759	26.1868	26.181	4.10515	1	1		1.21711	0.853833	1.58039	4.23924	4.23924		3.47927	37.2299	129.533	4822.51	0.000879053	0.000879053	0.0806278	7776.57
							5.39686	1.60342	1.30171	0.655458	1.73768	38.9954	50.7607	31.6577	41.2092	27245.7		17.6852	23.082	28.4789	23.0225	0.059502	1	1		41.2067	31.6558	50.7576	5047.83	5047.83		5.33678	42.4217	226.395	9604.07	0.525593	0.525593	0.177306	34057.1
							5.44073	1.94743	1.47372	0.668248	1.64514	31.4966	46.4171	23.835	35.1261	18910.4		17.6841	23.1248	28.5656	21.0978	2.02706	1	1		32.5971	22.119	43.0753	2993.25	2993.25		3.62455	46.1625	167.319	7723.85	0.387533	0.387533	0.15302	23638
							5.16042	2.12122	1.56061	0.817474	1.4606	14.75	23.019	10.8518	16.9354	4049.69		16.8643	22.0247	27.1851	18.7107	3.31396	1	1		12.9817	8.31839	17.6451	461.119	461.119		2.34006	43.9074	102.746	4511.31	0.102214	0.102214	0.0561047	5062.11
							4.57467	1.89868	1.44934	0.61038	1.54863	22.6297	32.7982	17.2742	25.0362	8142.49		18.8175	23.3922	27.9668	19.503	3.88917	1	1		13.1824	9.09546	17.2694	493.459	493.459		2.47729	44.1711	109.424	4833.4	0.102094	0.102094	0.105289	10178.1
							4.12421	1.8847	1.44235	0.61216	1.595	20.9615	30.2338	16.0417	23.1378	6283.98		17.4382	21.5624	25.6866	23.5289	1.96653	1	1		20.3381	14.1006	26.5755	1177.25	1177.25		2.69286	40.0663	107.893	4322.86	0.272332	0.272332	0.0908539	7854.97
							4.26248	2.47846	1.73923	0.677665	1.52955	16.656	28.9686	11.6882	20.3284	4534.05		20.7449	25.0074	29.2699	23.0895	1.9179	1	1		18.1543	10.4382	25.8705	848.358	848.358		3.34505	43.9935	147.16	6474.11	0.131039	0.131039	0.043771	5667.56
							4.94104	2.02664	1.51332	0.588619	1.74701	41.1352	62.2507	30.7162	46.4835	29681.1		17.043	21.984	26.9251	25.5655	3.58148	1	1		32.0231	21.1608	42.8854	2850.96	2850.96		2.13311	39.6163	84.5058	3347.8			0.554116	37101.4
							4.29244	1.94657	1.47328	0.696387	1.64932	20.0781	29.5808	15.1964	22.3886	6061.85		17.1322	21.4247	25.7171	19.6665	1.7582	1	1		20.4243	13.8631	26.9855	1175.28	1175.28		4.8637	46.3562	225.463	10451.6	0.11245	0.11245	0.0362496	7577.31
							4.08005	1.62536	1.31268	0.696191	1.4862	13.8455	18.1747	11.182	14.6783	2604.96		19.014	23.0941	27.1742	23.6972	0.603146	1	1		14.5171	11.0591	17.975	624.511	624.511		2.81984	41.2617	116.351	4800.86	0.130083	0.130083	0.0339127	3256.2
							5.42536	2.05021	1.5251	0.573077	1.56502	33.7129	51.4157	25.0783	38.247	21977.1		18.9104	24.3357	29.7611	22.1216	2.21413	1	1		34.9169	22.8948	46.9391	3376.15	3376.15		3.87491	42.4716	164.573	6989.69	0.483018	0.483018	0.196514	27471.4
							4.20641	1.76438	1.38219	0.610093	1.61403	22.5628	31.186	17.6754	24.4307	7284.32		19.1605	23.3669	27.5734	21.8777	1.4892	1	1		22.8484	16.5306	29.1662	1514.67	1514.67		3.60635	42.4403	153.054	6495.66	0.233182	0.233182	0.0700883	9105.4
							4.60929	2.12535	1.56268	0.644227	1.63886	25.1512	39.3032	18.4926	28.8979	10524.7		18.6132	23.2225	27.8318	24.6801	1.45764	1	1		27.4148	17.5435	37.2861	2055.01	2055.01		3.69553	44.8196	165.632	7423.56	0.276822	0.276822	0.0886087	13155.9
							4.63662	2.21208	1.60604	0.654263	1.7552	31.0962	49.9416	22.5768	36.2592	16423.9		16.8067	21.4434	26.08	20.8188	0.624574	1	1		35.9287	22.371	49.4864	3477.94	3477.94		4.47192	37.5141	167.76	6293.36	0.552637	0.552637	0.163107	20529.9
							4.30091	2.13317	1.56658	0.56663	1.69593	31.1075	48.7325	22.8451	35.7888	15042.6		19.5583	23.8592	28.1602	23.5472	0.312021	1	1		35.6945	22.7849	48.604	3479.12	3479.12		4.68013	42.3379	198.147	8389.11	0.414719	0.414719	0.112069	18803.2
							4.39481	2.48198	1.74099	0.527314	1.604	29.9966	52.2239	21.0412	36.6326	15171.6		16.0864	20.4812	24.876	23.1636	2.68237	1	1		29.0178	16.6674	41.3683	2166.13	2166.13		4.14264	42.4524	175.865	7465.91	0.290137	0.290137	0.127007	18964.4
							3.91166	1.92601	1.46301	0.561908	1.70883	27.5438	40.2968	20.9224	30.6096	10360.8		17.586	21.4977	25.4093	21.0134	0.484234	1	1		30.3741	20.7615	39.9868	2608.1	2608.1		3.20627	39.3655	126.216	4968.56	0.524921	0.524921	0.130329	12951
							4.62077	2.2149	1.60745	0.722371	1.61307	19.9555	32.0775	14.4826	23.28	6743.88		21.4673	26.0881	30.7089	26.9099	0.821784	1	1		22.9089	14.2517	31.5661	1413.31	1413.31		2.33638	40.8702	95.4882	3902.62	0.362144	0.362144	0.108003	8429.85
							5.72491	2.19587	1.59794	0.551058	1.46101	30.5646	48.8402	22.2419	35.541	19537.4		16.81	22.5349	28.2599	21.3621	1.17279	1	1		34.7873	21.7701	47.8044	3269.48	3269.48		2.47439	47.5072	117.551	5584.54	0.585452	0.585452	0.218655	24421.8
							5.25325	2.49252	1.74626	0.633177	1.67935	34.9266	60.991	24.4696	42.7303	24630.3		16.6743	21.9276	27.1808	21.7373	0.190266	1	1		42.7022	24.4535	60.9509	4682.43	4682.43		2.18961	41.7482	91.4123	3816.3			0.403374	30787.9
							5.51433	2.05655	1.52827	0.488431	1.56473	44.3792	67.8235	32.9793	50.4014	38749.4		19.7319	25.2462	30.7605	22.906	2.34023	1	1		45.6375	29.8621	61.4128	5761.42	5761.42		3.20641	41.9915	134.642	5653.83			0.428354	48436.8
							4.72198	2.2177	1.60885	0.626313	1.57666	24.1687	38.8839	17.5334	28.2087	10113.7		16.3404	21.0624	25.7844	19.5104	1.55197	1	1		26.6415	16.5593	36.7237	1910.47	1910.47		2.52178	41.2865	104.115	4298.55	0.444445	0.444445	0.147051	12642.1
							4.33988	2.05816	1.52908	0.716257	1.61491	18.345	28.051	13.6291	20.8401	5212.47		18.7523	23.0921	27.432	23.0914	0.000694966	1	1		20.8401	13.6291	28.051	1201.06	1201.06		2.17294	41.0547	89.2094	3662.46	0.327939	0.327939	0.0889509	6515.59
							4.67588	1.76442	1.38221	0.716426	1.50128	16.7139	23.1021	13.0933	18.0977	4443.4		18.8477	23.5236	28.1995	22.3446	1.17897	1	1		17.513	12.6703	22.3557	889.867	889.867		3.2031	48.8256	156.393	7636	0.116536	0.116536	0.0363688	5554.25
							4.49627	2.12829	1.56414	0.644243	1.6017	22.4658	35.1398	16.5108	25.8253	8195.4		18.1835	22.6797	27.176	23.1055	0.425746	1	1		25.7093	16.4366	34.9819	1806.37	1806.37		2.33084	46.8773	109.264	5121.98	0.35267	0.35267	0.100003	10244.2
							4.81862	2.35675	1.67837	0.643204	1.69079	30.1109	50.5374	21.4437	35.9905	16405.3		17.5618	22.3804	27.199	20.4367	1.94373	1	1		32.9326	19.6217	46.2434	2850.6	2850.6		4.08984	40.2889	164.775	6638.6	0.429398	0.429398	0.15445	20506.7
							5.45208	2.71307	1.85654	0.597625	1.56333	31.6959	58.8447	21.6893	40.267	21860.7		19.1297	24.5818	30.0338	24.3626	0.219132	1	1		40.2344	21.6718	58.7971	4003.13	4003.13		3.29428	46.8525	154.345	7231.46	0.553572	0.553572	0.188938	27325.9
							5.57394	2.26483	1.63241	0.690416	1.54622	25.2641	41.2414	18.2095	29.7255	13150.6		19.1952	24.7692	30.3431	24.0191	0.750061	1	1		29.4551	18.0439	40.8663	2316.57	2316.57		2.66922	41.5498	110.905	4608.09	0.502719	0.502719	0.178362	16438.2
							5.19125	1.98485	1.49242	0.521498	1.7454	55.2006	82.3827	41.5058	61.9443	55765.7		18.2281	23.4194	28.6106	22.1336	1.28579	1	1		60.0141	40.2125	79.8158	10083.2	10083.2		3.05398	42.3999	129.488	5490.29			0.634821	69707.1
							3.86927	1.71757	1.35879	0.746955	1.53775	12.545	17.046	9.92449	13.4853	2056.42		15.5276	19.3968	23.2661	23.9973	4.60047	1	0		#NUM!	#NUM!	#NUM!	#NUM!			2.76829	42.7226	118.269	5052.74	#VALUE!		0.0254369	2570.52
							5.48603	1.85907	1.42953	0.547823	1.45608	28.6407	40.9429	22.0234	31.4831	15540.7		17.4921	22.9782	28.4642	24.4489	1.47072	1	1		30.3307	21.2172	39.4442	2629.19	2629.19		4.36015	43.9343	191.56	8416.06	0.312401	0.312401	0.11541	19425.9
							5.79152	2.08299	1.54149	0.723618	1.58379	26.9534	41.5485	19.9466	30.7475	15078.8		15.99	21.7816	27.5731	23.0684	1.2868	1	1		29.979	19.448	40.5099	2475.06	2475.06		3.2439	40.5504	131.542	5334.07	0.46401	0.46401	0.17668	18848.5
							5.31165	1.82238	1.41119	0.692963	1.48167	20.4439	28.8502	15.8311	22.3406	7621.46		17.9787	23.2903	28.602	22.6906	0.599767	1	1		22.1978	15.7298	28.6657	1416.56	1416.56		3.91228	41.6006	162.753	6770.64	0.209222	0.209222	0.070354	9526.83
							4.86134	2.70317	1.85159	0.537203	1.7826	50.7303	93.9316	34.7486	64.3401	49848.9		19.4234	24.2848	29.1461	23.4121	0.872659	1	1		63.295	34.1842	92.4058	9923.72	9923.72		2.57265	42.6912	109.829	4688.75			0.664474	62311.1
							4.4869	2.84818	1.92409	0.67879	1.5172	17.5558	33.7791	11.8599	22.8195	5647.07		16.3071	20.794	25.2809	21.514	0.720024	1	1		22.5237	11.7062	33.3413	1226.16	1226.16		2.89159	42.6847	123.427	5268.44	0.232736	0.232736	0.0669916	7058.83
							5.23554	1.98056	1.49028	0.498578	1.30979	21.7569	32.4238	16.371	24.3974	8730.76		19.5171	24.7526	29.9882	23.1678	1.58485	1	1		23.2528	15.603	30.9026	1514.79	1514.79		3.02233	47.0054	142.066	6677.85	0.226838	0.226838	0.0817138	10913.4
							4.41644	2.08556	1.54278	0.582988	1.5441	22.7982	35.1726	16.8649	26.0187	8230.19		19.8294	24.2459	28.6623	21.0951	3.15073	1	1		18.2326	11.818	24.6471	915.084	915.084		5.12922	40.8492	209.525	8558.93	0.106916	0.106916	0.0600994	10287.7
							5.30967	1.92832	1.46416	0.690878	1.47663	20.3142	29.7432	15.4244	22.5838	7652.68		20.7875	26.0972	31.4068	21.4728	4.62435	1	1		11.0979	7.57968	14.616	348.041	348.041		4.99756	38.4957	192.385	7405.99	0.0469945	0.0469945	0.0645819	9565.85
							4.37193	1.93339	1.46669	0.652496	1.76197	28.5466	41.8691	21.6559	31.7625	12453.5		17.8494	22.2213	26.5933	22.9612	0.739878	1	1		31.3044	21.3435	41.2652	2766.94	2766.94		2.19408	39.936	87.6228	3499.31	0.79071	0.79071	0.222428	15566.9
							5.06266	1.73787	1.36893	0.652209	1.6302	28.2401	38.6589	22.245	30.4519	13677.6		16.7538	21.8164	26.8791	20.6928	1.12367	1	1		29.6924	21.6901	37.6946	2568.57	2568.57		3.33143	42.8676	142.811	6121.95	0.419567	0.419567	0.139637	17097
							5.04129	2.57352	1.78676	0.838698	1.61091	17.9803	32.1265	12.4835	22.305	6351.72		19.6823	24.7236	29.7648	24.6046	0.118986	1	1		22.2988	12.48	32.1176	1259.24	1259.24		4.97267	44.9431	223.487	10044.2	0.12537	0.12537	0.0395235	7939.65
							5.22878	2.37743	1.68871	0.690294	1.63544	27.4254	46.3136	19.4805	32.8971	14820.4		15.4145	20.6433	25.8721	23.1736	2.5303	1	1		28.7887	17.0477	40.5296	2170.64	2170.64		4.02884	43.5335	175.389	7635.31	0.28429	0.28429	0.121314	18525.5
							5.25213	2.02523	1.51261	0.72391	1.61884	24.7317	37.4095	18.4717	27.9406	11401.8		17.3485	22.6006	27.8527	22.4752	0.125447	1	1		27.9327	18.4665	37.3988	2169.66	2169.66		3.32405	44.5455	148.072	6595.93	0.328939	0.328939	0.108039	14252.3
							4.02159	2.0887	1.54435	0.591806	1.65227	23.7163	36.6262	17.5354	27.0808	8114.39		16.8772	20.8988	24.9203	19.7874	1.11132	1	1		26.0263	16.8526	35.2	1863.63	1863.63		3.69349	38.9083	143.707	5591.41	0.333301	0.333301	0.0907014	10143
							4.15869	1.79888	1.39944	0.698957	1.70818	21.0377	29.441	16.3663	22.9037	6295.2		15.7237	19.8824	24.0411	22.0297	2.14734	1	1		19.6142	14.0157	25.2126	1110.16	1110.16		3.61903	44.2744	160.23	7094.1	0.15649	0.15649	0.0554616	7869
							4.42883	2.22275	1.61138	0.711257	1.77783	25.8266	41.6164	18.7229	30.1696	10841.2		19.1529	23.5817	28.0105	25.4588	1.87709	1	1		27.3259	16.9581	37.6936	2008.14	2008.14		3.98205	43.4769	173.127	7527.02	0.266791	0.266791	0.0900189	13551.5
							4.43266	2.38875	1.69438	0.723741	1.66477	20.432	34.6196	14.4927	24.5562	6986.93		16.6414	21.0741	25.5067	17.4897	3.5844	1	1		14.4467	8.52626	20.3671	545.555	545.555		5.03717	47.6198	239.869	11422.5	0.0477614	0.0477614	0.0382301	8733.66
							5.02755	1.55493	1.27747	0.680875	1.72163	31.2519	39.9232	25.6752	32.7992	16189.9		17.1903	22.2179	27.2454	19.3312	2.88666	1	1		26.8539	21.0213	32.6866	2158.63	2158.63		3.18277	37.7825	120.253	4543.45	0.475108	0.475108	0.22271	20237.4
							4.4922	2.2298	1.6149	0.58704	1.56574	24.1986	39.0784	17.5255	28.302	9665.32		19.3502	23.8424	28.3346	20.3326	3.5098	1	1		17.6644	10.9384	24.3905	838.154	838.154		2.78955	44.4276	123.933	5506.04	0.152225	0.152225	0.109713	12081.7
							5.47885	2.14296	1.57148	0.686914	1.66443	31.6926	49.8043	23.2409	36.5226	19923.2		18.8061	24.285	29.7638	23.624	0.661014	1	1		36.2558	23.0711	49.4405	3583.45	3583.45		2.65997	41.9601	111.613	4683.28	0.765159	0.765159	0.265882	24904
							3.95169	1.99418	1.49709	0.651018	1.63194	18.9724	28.4034	14.2431	21.3232	5022.34		18.2091	22.1608	26.1125	22.8923	0.73147	1	1		20.9547	13.997	27.9125	1227.39	1227.39		2.83452	45.5852	129.212	5890.15	0.20838	0.20838	0.0532918	6277.93
							5.19177	2.00988	1.50494	0.680632	1.58859	25.2219	37.9574	18.8854	28.4214	11692		18.0021	23.1938	28.3856	21.4622	1.73167	1	1		26.7939	17.804	35.7838	2001.49	2001.49		3.6975	45.7381	169.117	7735.07	0.258755	0.258755	0.0944722	14615
							4.20695	1.92293	1.46146	0.672849	1.49289	15.4318	22.553	11.7284	17.1407	3495.92		16.5803	20.7873	24.9942	25.3047	4.51745	1	0		#NUM!	#NUM!	#NUM!	#NUM!			2.18473	48.4074	105.757	5119.41	#VALUE!		0.0426796	4369.9
							4.26627	2.2341	1.61705	0.806043	1.59366	14.2337	23.0166	10.3024	16.6595	3178.16		16.2579	20.5242	24.7905	20.7011	0.176875	1	1		16.6451	10.2935	22.9968	743.671	743.671		3.69651	41.7056	154.165	6429.56	0.115664	0.115664	0.030894	3972.7
							5.31907	2.73734	1.86867	0.750408	1.51206	19.3225	36.1074	13.1907	24.6491	7958.84		20.0265	25.3455	30.6646	22.5937	2.7519	1	1		21.0938	11.2881	30.8995	1095.78	1095.78		3.18532	43.3245	138.003	5978.89	0.183275	0.183275	0.0831973	9948.55
							4.70381	2.23367	1.61684	0.685676	1.66261	24.5749	39.7335	17.7885	28.761	10444.7		18.7417	23.4455	28.1493	21.3179	2.12763	1	1		25.6507	15.8647	35.4366	1766.18	1766.18		4.99402	46.004	229.745	10569.2	0.167106	0.167106	0.0617636	13055.8
							5.42629	1.93384	1.46692	0.636061	1.48516	24.1376	35.4079	18.3096	26.8588	11051.8		16.6648	22.0911	27.5173	20.3387	1.75231	1	1		25.4198	17.3286	33.5109	1824.32	1824.32		4.03022	48.0157	193.514	9291.7	0.196338	0.196338	0.0743391	13814.7
							5.50212	1.952	1.476	0.721775	1.68374	30.5684	45.1189	23.1142	34.1165	18026.7		18.4852	23.9874	29.4895	24.7634	0.776064	1	1		33.7755	22.8831	44.6678	3211.14	3211.14		3.95478	42.4428	167.852	7124.12	0.450743	0.450743	0.158149	22533.4
							4.18749	2.16805	1.58402	0.653339	1.73196	24.9673	39.5489	18.2417	28.8953	9490.8		17.08	21.2675	25.455	22.3749	1.10746	1	1		27.8664	17.5922	38.1407	2107.94	2107.94		4.0659	45.9815	186.956	8596.52	0.245208	0.245208	0.0690018	11863.5
							5.77853	1.97447	1.48724	0.584603	1.53804	33.9066	50.4271	25.5395	37.9833	23379.9		17.935	23.7135	29.4921	24.2768	0.563253	1	1		37.8024	25.4179	50.1869	4007.56	4007.56		2.69161	39.0138	105.01	4096.83			0.356677	29224.9
							4.50207	2.61549	1.80774	0.746947	1.35083	11.3192	20.4622	7.82348	14.1428	2264.2		18.6499	23.152	27.6541	19.4738	3.67819	1	1		8.15528	4.51131	11.7993	167.227	167.227		4.00838	42.8759	171.863	7368.79	0.022694	0.022694	0.0192043	2830.24
							4.3693	2.19139	1.59569	0.538811	1.69854	34.9888	55.8314	25.4777	40.6545	19525.4		17.3031	21.6724	26.0417	21.6365	0.0359194	1	1		40.6532	25.4768	55.8295	4468.47	4468.47		4.04694	46.1146	186.623	8606.06	0.519223	0.519223	0.1418	24406.7
							4.88369	1.89586	1.44793	0.691663	1.65924	25.6124	37.0849	19.561	28.323	11129.8		16.8502	21.7339	26.6175	23.7961	2.06222	1	1		25.674	17.7315	33.6164	1872.61	1872.61		3.06567	44.3646	136.008	6033.93	0.310346	0.310346	0.115283	13912.2
							4.89029	1.77658	1.38829	0.777626	1.68047	21.9765	30.5098	17.1733	23.8416	8049.68		16.8531	21.7434	26.6337	17.2777	4.46563	1	1		9.71777	6.99982	12.4357	273.468	273.468		2.72415	46.3283	126.205	5846.87	0.0467717	0.0467717	0.0860469	10062.1
							4.71907	2.17433	1.58716	0.688581	1.47506	17.1003	27.1409	12.4824	19.8117	5022.62		20.2891	25.0082	29.7273	25.6074	0.599206	1	1		19.6513	12.3814	26.9212	1047.16	1047.16		3.34842	44.7322	149.782	6700.08	0.156291	0.156291	0.0468522	6278.27
							4.63114	2.14378	1.57189	0.742459	1.44787	14.1605	22.2587	10.3829	16.3208	3362.46		18.4652	23.0963	27.7275	21.2147	1.88169	1	1		14.9129	9.48723	20.3386	606.191	606.191		3.97045	45.4688	180.532	8208.58	0.0738485	0.0738485	0.0256017	4203.08
							4.47185	2.3736	1.6868	0.630467	1.57917	22.0597	37.2103	15.6768	26.4435	8195.13		19.8672	24.339	28.8109	22.3508	1.98827	1	1		23.686	14.042	33.33	1470.32	1470.32		3.24165	40.1772	130.241	5232.71	0.280988	0.280988	0.0978836	10243.9
							4.45682	1.74728	1.37364	0.668265	1.51424	17.6948	24.3063	13.9109	19.1086	4734.22		17.494	21.9508	26.4076	17.9872	3.96365	1	1		8.73713	6.36056	11.1137	222.077	222.077		3.14192	44.2856	139.142	6161.97	0.03604	0.03604	0.0480186	5917.78
							5.14853	2.18562	1.59281	0.705555	1.97185	50.3504	80.1988	36.6938	58.4463	47598.5		18.7228	23.8714	29.0199	20.2259	3.64551	1	1		41.2714	25.9111	56.6318	4609.94	4609.94		2.49256	44.0502	109.798	4836.61			0.61508	59498.1
							4.63788	2.7063	1.85315	0.619943	1.68585	29.7423	55.117	20.3661	37.7416	16355.5		18.145	22.7829	27.4207	20.795	1.98791	1	1		34.0988	18.4005	49.7972	2878.61	2878.61		3.21301	47.0592	151.202	7115.43	0.40456	0.40456	0.143662	20444.4
							4.2735	2.51789	1.75894	0.603141	1.54394	20.5546	36.1544	14.359	25.2567	6969.79		18.5683	22.8418	27.1153	25.3162	2.47445	1	1		20.5921	11.7071	29.4771	1084.13	1084.13		3.11849	43.8814	136.844	6004.9	0.180542	0.180542	0.0725428	8712.24
							4.92361	2.72393	1.86197	0.637407	1.75727	36.3266	67.6389	24.8313	46.2351	25979.5		19.4361	24.3597	29.2833	23.139	1.22077	1	1		44.7914	24.056	65.5268	4952.13	4952.13		2.55674	40.8685	104.49	4270.37			0.380229	32474.3
							4.35651	2.00987	1.50494	0.694874	1.64643	20.5393	30.9103	15.3792	23.1448	6506.17		19.0651	23.4217	27.7782	18.8723	4.54939	0	1		#NUM!	#NUM!	#NUM!	#NUM!			3.87745	45.1699	175.144	7911.25	#VALUE!		0.0513997	8132.72
							4.5011	2.08402	1.54201	0.70379	1.52656	16.9909	26.2001	12.5719	19.386	4657.7		18.2345	22.7356	27.2367	22.5777	0.157874	1	1		19.3741	12.5642	26.1839	1033.52	1033.52		3.51282	46.5197	163.416	7602.06	0.135953	0.135953	0.0382931	5822.12
							4.00036	2.08664	1.54332	0.631647	1.57433	18.282	28.215	13.5218	20.8684	4794.7		16.5674	20.5678	24.5681	26.1653	5.59754	1	0		#NUM!	#NUM!	#NUM!	#NUM!			3.77885	40.4831	152.98	6193.09	#VALUE!		0.0483876	5993.38
							4.80125	2.08912	1.54456	0.633402	1.59879	25.4926	39.3748	18.8476	29.1112	11193.8		16.2125	21.0137	25.815	23.6709	2.65717	1	1		24.2465	15.698	32.795	1617.35	1617.35		2.80993	42.0113	118.049	4959.39	0.326118	0.326118	0.141068	13992.3
							5.06593	1.91893	1.45946	0.789167	1.63559	20.9278	30.5434	15.9169	23.2301	7737.2		16.8798	21.9457	27.0117	21.9262	0.019488	1	1		23.2299	15.9168	30.5431	1527.28	1527.28		4.22926	40.1637	169.863	6822.31	0.223865	0.223865	0.0708814	9671.5
							5.53623	1.79697	1.39849	0.596372	1.65323	39.795	55.6528	30.9703	43.3115	29977.5		17.4793	23.0156	28.5518	25.0585	2.04297	1	1		40.2547	28.7845	51.7249	4677.43	4677.43		4.0192	43.8401	176.202	7724.71	0.605516	0.605516	0.242546	37471.9
							4.36083	1.89022	1.44511	0.624103	1.52325	19.324	27.9252	14.7735	21.3494	5651.97		18.2926	22.6534	27.0143	20.229	2.42449	1	1		17.7457	12.2798	23.2115	895.457	895.457		3.41675	42.3291	144.628	6121.97	0.146269	0.146269	0.0577017	7064.96
							3.90626	2.46874	1.73437	0.746193	1.73635	17.7124	30.7198	12.4435	21.5817	4691.09		17.2775	21.1838	25.0901	18.5966	2.58717	1	1		16.1696	9.32302	23.0161	674.122	674.122		3.32927	37.0167	123.238	4561.87	0.147773	0.147773	0.0642703	5863.86
							4.19798	2.27763	1.63882	0.672095	1.70784	22.844	37.4371	16.4369	26.937	8115.44		18.8954	23.0933	27.2913	18.8341	4.25926	0	1		#NUM!	#NUM!	#NUM!	#NUM!			2.70297	39.518	106.816	4221.17	#VALUE!		0.12016	10144.3
							4.43496	2.71126	1.85563	0.69523	1.65674	21.5416	39.9733	14.7434	27.3583	8211.22		17.7153	22.1502	26.5852	21.8819	0.26832	1	1		27.3082	14.7164	39.9	1844.7	1844.7		3.80402	43.5129	165.524	7202.44	0.256121	0.256121	0.0712538	10264
							4.76947	1.88715	1.44358	0.720405	1.52773	17.9516	25.9145	13.7321	19.8233	5332.12		16.1053	20.8748	25.6443	20.6795	0.195283	1	1		19.8067	13.7206	25.8928	1116.1	1116.1		3.0069	44.3535	133.367	5915.29	0.18868	0.18868	0.0563383	6665.16
							4.41989	1.97438	1.48719	0.548249	1.49614	22.7067	33.7691	17.1037	25.4364	8019.93		17.0361	21.456	25.8759	21.3475	0.108518	1	1		25.4287	17.0985	33.7589	1813.41	1813.41		2.68518	41.0542	110.238	4525.73	0.40069	0.40069	0.110755	10024.9
							4.73462	2.60495	1.80247	0.590446	1.42575	19.4547	35.0667	13.4615	24.2641	7021.41		18.5325	23.2671	28.0017	23.3964	0.129238	1	1		24.2551	13.4565	35.0536	1481.89	1481.89		2.57154	39.1593	100.7	3943.33	0.375797	0.375797	0.111286	8776.76
							3.92628	1.83797	1.41898	0.719756	1.59978	15.0907	21.4134	11.6506	16.532	3077.26		18.6544	22.5806	26.5069	23.5283	0.947662	1	1		16.0432	11.3061	20.7803	738.101	738.101		3.59961	40.8424	147.017	6004.52	0.122924	0.122924	0.0320307	3846.58
							4.30127	2.60578	1.80289	0.67441	1.52582	16.8962	30.4619	11.6901	21.076	4811.97		19.1178	23.4191	27.7203	18.4788	4.9403	0	0		#NUM!	#NUM!	#NUM!	#NUM!			3.59318	48.4133	173.957	8421.85	#VALUE!		0.0357105	6014.96
							5.10775	2.05219	1.5261	0.640556	1.53833	24.382	37.2093	18.1315	27.6704	10825.9		16.3253	21.4331	26.5409	21.4723	0.0392183	1	1		27.6696	18.1309	37.2082	2119.38	2119.38		1.64907	41.2313	67.9931	2803.44	0.755992	0.755992	0.241353	13532.4
							4.03579	2.30862	1.65431	0.615649	1.66947	23.0826	38.1857	16.5405	27.3631	8008.07		16.5759	20.6117	24.6475	20.9263	0.314563	1	1		27.2799	16.4902	38.0695	1972.21	1972.21		3.87053	43.9105	169.957	7462.9	0.264268	0.264268	0.0670657	10010.1
							5.09299	2.61077	1.80538	0.60949	1.72558	38.9941	70.3993	26.965	48.6821	30373.2		19.1109	24.2039	29.2969	18.7532	5.45075	0	0		#NUM!	#NUM!	#NUM!	#NUM!			3.67963	46.0959	169.616	7818.59	#VALUE!		0.242796	37966.5
							4.29677	1.78805	1.39403	0.584254	1.75238	32.9993	46.0018	25.7274	35.8646	15975.8		15.6352	19.9319	24.2287	22.4792	2.54727	1	1		28.8827	20.7189	37.0464	2411.36	2411.36		4.18943	42.3745	177.525	7522.52	0.320552	0.320552	0.132733	19969.8
							5.68788	2.07909	1.53954	0.742369	1.71015	32.5338	50.0872	24.0909	37.0891	21561.6		17.0932	22.7811	28.469	20.9782	1.80287	1	1		35.1766	22.8487	47.5045	3409.94	3409.94		3.85891	38.9192	150.186	5845.13	0.583382	0.583382	0.230551	26952
							4.63323	2.24841	1.6242	0.636624	1.27713	12.6149	20.4891	9.11273	14.8009	2717.73		17.4962	22.1294	26.7626	24.3241	2.1947	1	1		13.0351	8.02552	18.0447	454.958	454.958		2.90923	45.4516	132.229	6010.01	0.0757001	0.0757001	0.0282625	3397.16
							4.57343	2.27338	1.63669	0.631627	1.84943	38.9143	63.6907	28.0159	45.8533	25637.3		16.7756	21.3491	25.9225	22.0646	0.715544	1	1		45.2886	27.6709	62.9063	5468.48	5468.48		2.45692	45.9909	112.996	5196.77			0.308332	32046.6
							4.54115	2.20586	1.60293	0.590401	1.53925	23.11	37.0437	16.7933	26.9185	8874.96		18.1628	22.7039	27.2451	20.7323	1.97164	1	1		24.249	15.1279	33.3701	1585.94	1585.94		3.43809	39.9978	137.516	5500.35	0.288334	0.288334	0.100845	11093.7
							3.95254	1.73676	1.36838	0.679847	1.52378	14.6176	20.0025	11.5171	15.7598	2860.58		18.6866	22.6391	26.5917	24.3903	1.75114	1	1		14.1287	10.3251	17.9323	581.674	581.674		3.83751	46.9002	179.98	8441.1	0.0689097	0.0689097	0.0211805	3575.73
							4.29102	2.39369	1.69684	0.609697	1.52952	19.7781	33.5604	14.0204	23.7904	6343.04		16.2843	20.5753	24.8663	22.8852	2.30986	1	1		20.0494	11.8157	28.2831	1049.87	1049.87		2.95914	40.3781	119.484	4824.55	0.217611	0.217611	0.0821714	7928.8
							4.72198	2.13319	1.5666	0.74924	1.56663	17.8863	28.0207	13.1356	20.5781	5460.1		19.5707	24.2927	29.0146	22.1425	2.15018	1	1		18.3209	11.6947	24.9471	916.556	916.556		3.4776	40.9309	142.342	5826.17	0.157317	0.157317	0.058573	6825.13
							4.41344	2.03745	1.51872	0.75559	1.5115	14.4062	21.879	10.7385	16.3087	3257.59		16.689	21.1024	25.5159	25.838	4.73553	1	0		#NUM!	#NUM!	#NUM!	#NUM!			3.46532	42.638	147.754	6299.96	#VALUE!		0.0323176	4071.99
							4.34094	2.36169	1.68084	0.604013	1.65312	26.059	43.8012	18.5465	31.1739	11078.5		18.6183	22.9592	27.3002	19.2767	3.6825	1	1		16.5061	9.8201	23.192	715.492	715.492		2.75834	43.1617	119.055	5138.61	0.139238	0.139238	0.134746	13848.2
							4.9055	1.88812	1.44406	0.708159	1.44289	16.3239	23.5727	12.4847	18.0287	4535.45		17.0079	21.9134	26.8189	25.2914	3.378	1	1		13.0731	9.05299	17.0932	486.143	486.143		3.21885	44.261	142.47	6305.85	0.077094	0.077094	0.0449527	5669.31
							4.69005	1.66979	1.3349	0.659696	1.54487	20.7001	27.6325	16.5484	22.0905	6737.59		20.0063	24.6963	29.3864	26.0404	1.3441	1	1		21.1639	15.8543	26.4734	1318.58	1318.58		3.87605	42.1052	163.202	6871.65	0.191887	0.191887	0.0612806	8421.98
							5.04399	2.12222	1.56111	0.721752	1.57057	21.1919	33.0829	15.5888	24.3359	8172.24		17.6741	22.7181	27.7621	23.5004	0.782343	1	1		24.0413	15.4002	32.6825	1581.22	1581.22		2.18874	39.7986	87.1087	3466.8	0.456102	0.456102	0.14733	10215.3
							4.90346	2.33228	1.66614	0.610174	1.42969	19.676	32.783	14.0562	23.4196	7098.56		20.1754	25.0788	29.9823	21.3468	3.73208	1	1		15.1905	9.11718	21.2638	609.048	609.048		4.59245	38.7367	177.896	6891.11	0.0883817	0.0883817	0.0643815	8873.2
							5.20477	2.01053	1.50527	0.659543	1.51075	22.6662	34.1187	16.97	25.5443	9467.26		20.1062	25.311	30.5157	18.6897	6.62123	0	0		#NUM!	#NUM!	#NUM!	#NUM!			2.34772	45.1728	106.053	4790.72	#VALUE!		0.12351	11834.1
							4.87399	2.4321	1.71605	0.697285	1.58287	21.7114	37.2578	15.3192	26.2885	8739.54		18.5918	23.4658	28.3398	22.7386	0.727139	1	1		25.9943	15.1478	36.8409	1753.19	1753.19		3.5046	37.5744	131.683	4947.91	0.354329	0.354329	0.110394	10924.4
							4.40616	2.17075	1.58537	0.633846	1.57838	21.3361	33.8257	15.5825	24.7041	7296.16		16.7251	21.1312	25.5374	22.993	1.8618	1	1		22.3904	14.1231	30.6576	1360.25	1360.25		4.39214	43.2692	190.044	8223.06	0.165419	0.165419	0.055455	9120.2
							5.62885	2.01187	1.50594	0.608336	1.65032	39.3246	59.2204	29.4355	44.3279	30825.6		19.2633	24.8921	30.521	23.9371	0.955037	1	1		43.6852	29.0087	58.3617	5318.71	5318.71		2.74956	40.5168	111.403	4513.71			0.426832	38532
							4.32707	1.88078	1.44039	0.658618	1.64743	22.2267	32.0152	17.0223	24.5187	7408.28		15.9113	20.2384	24.5654	24.3761	4.1377	1	1		7.17407	4.98064	9.3675	146.575	146.575		4.86131	38.1011	185.221	7057.14	0.0207697	0.0207697	0.0656098	9260.35
							4.47408	2.39461	1.6973	0.713511	1.67745	21.749	36.9146	15.4157	26.1652	7998.63		21.0364	25.5105	29.9846	20.4941	5.01645	0	0		#NUM!	#NUM!	#NUM!	#NUM!			2.77115	44.0691	122.122	5381.81	#VALUE!		0.0928896	9998.29
							4.78741	2.20944	1.60472	0.643351	1.47664	19.3694	31.0824	14.068	22.5752	6576.54		17.805	22.5924	27.3799	22.1967	0.395708	1	1		22.498	14.0199	30.9761	1364.33	1364.33		2.63505	41.3801	109.039	4512.03	0.302377	0.302377	0.0910974	8220.68
							4.97598	1.87492	1.43746	0.76406	1.62519	21.0137	30.2063	16.1107	23.1585	7607.48		19.8697	24.8456	29.8216	24.3002	0.545471	1	1		23.019	16.0136	30.0243	1510.47	1510.47		2.29945	42.9885	98.85	4249.41	0.355454	0.355454	0.11189	9509.35
							4.10738	2.11264	1.55632	0.576532	1.70913	28.6711	44.6214	21.1212	32.8713	12161.2		18.6375	22.7448	26.8522	21.4278	1.31704	1	1		31.1356	20.0059	42.2653	2656.39	2656.39		3.37866	41.8829	141.508	5926.77	0.448202	0.448202	0.128244	15201.5
							5.19197	2.78275	1.89138	0.723321	1.49069	18.8813	35.7116	12.8332	24.2724	7475.28		18.4765	23.6684	28.8604	20.1681	3.50031	1	1		17.9269	9.47822	26.3755	785.376	785.376		2.73529	39.7626	108.762	4324.67	0.181604	0.181604	0.108033	9344.1
							4.34938	1.71842	1.35921	0.460001	1.47671	27.5917	37.5029	21.8241	29.6635	11183.5		19.9149	24.2643	28.6137	18.3371	5.92726	0	0		#NUM!	#NUM!	#NUM!	#NUM!			3.63486	43.7376	158.98	6953.41	#VALUE!		0.100522	13979.4
							4.65766	2.27415	1.63708	0.595382	1.72564	34.8044	56.9774	25.0543	41.0159	20888.3		18.6318	23.2895	27.9471	25.8142	2.52474	1	1		34.4672	21.0541	47.8803	3166.97	3166.97		2.40828	38.6174	93.0014	3591.48			0.363505	26110.4
							4.27037	1.9415	1.47075	0.706706	1.60944	18.0857	26.5995	13.7005	20.15	4889.05		16.9374	21.2078	25.4782	25.5206	4.31287	1	1		#NUM!	#NUM!	#NUM!	#NUM!			4.92041	44.2122	217.542	9618	#VALUE!		0.0317702	6111.32
							4.90051	2.14368	1.57184	0.620086	1.81593	42.69	67.1019	31.3021	49.202	32337		17.1833	22.0838	26.9843	21.2601	0.823646	1	1		48.5021	30.8569	66.1473	6412.3	6412.3		2.283	42.5644	97.1746	4136.18			0.48863	40421.3
							5.35901	2.55723	1.77861	0.502678	1.6234	46.6141	82.9085	32.4212	57.6649	45254.7		15.871	21.23	26.589	23.2736	2.04368	1	1		53.3071	29.9711	76.643	7216.48	7216.48		3.86779	37.4492	144.846	5424.35			0.521429	56568.3
							4.72183	2.26333	1.63167	0.538496	1.71578	41.4814	67.6838	29.9045	48.7942	30024.9		17.9919	22.7138	27.4356	20.4187	2.29509	1	1		42.6424	26.1343	59.1506	4856.46	4856.46		3.4666	44.1762	153.141	6765.19	0.71786	0.71786	0.277384	37531.1
							4.5329	1.59311	1.29656	0.528045	1.60271	31.3661	40.6679	25.5273	33.0976	14783.7		17.4384	21.9713	26.5042	23.4387	1.4674	1	1		31.3154	24.1527	38.478	2919.64	2919.64		4.63113	38.3451	177.581	6809.35	0.428768	0.428768	0.135693	18479.6
							5.3817	1.74099	1.3705	0.737587	1.49995	19.7066	27.0079	15.5129	21.2604	7083.59		18.2915	23.6732	29.0549	18.24	5.43315	0	1		#NUM!	#NUM!	#NUM!	#NUM!			2.57054	47.2584	121.48	5740.93	#VALUE!		0.0771172	8854.49
							4.09643	2.49735	1.74867	0.7714	1.64026	15.4667	27.0462	10.83	18.9381	3769.55		19.7655	23.862	27.9584	21.6594	2.20256	1	1		15.9677	9.13129	22.804	654.175	654.175		2.67018	42.9647	114.723	4929.06	0.132718	0.132718	0.0477976	4711.94
							5.13504	1.8191	1.40955	0.671304	1.57789	24.7893	34.9418	19.2083	27.075	10827.5		17.2818	22.4168	27.5519	20.3812	2.03563	1	1		24.8568	17.6345	32.079	1777.19	1777.19		4.93248	41.1537	202.99	8353.78	0.212741	0.212741	0.0810072	13534.3
							3.95479	2.46949	1.73474	0.553225	1.47938	18.3536	31.8389	12.8929	22.3659	5100.14		19.3438	23.2986	27.2534	23.2722	0.0263914	1	1		22.3654	12.8926	31.8382	1289.55	1289.55		2.40797	45.2948	109.068	4940.23	0.261031	0.261031	0.064523	6375.17
							5.28644	1.73089	1.36544	0.558777	1.58164	34.9591	47.7347	27.5781	37.6564	21863.1		17.9807	23.2672	28.5536	20.1963	3.07091	1	1		30.6513	22.4478	38.8547	2740.11	2740.11		3.5991	45.0395	162.102	7300.98	0.375307	0.375307	0.187159	27328.8
							3.98817	1.9105	1.45525	0.607657	1.61701	20.9549	30.4947	15.9616	23.2281	6098.5		18.8007	22.7889	26.777	22.1181	0.670768	1	1		22.8972	15.7342	30.0602	1485.89	1485.89		2.69631	44.7349	120.619	5395.88	0.275376	0.275376	0.0706385	7623.13
							6.05081	1.65705	1.32852	0.773162	1.54953	24.2421	32.2062	19.4359	25.821	11898.9		17.5717	23.6226	29.6734	25.3184	1.69585	1	1		24.7862	18.6569	30.9154	1812.03	1812.03		3.73389	43.1081	160.961	6938.72	0.261148	0.261148	0.107179	14873.6
							4.30387	2.25995	1.62998	0.646791	1.55989	19.2283	31.3416	13.8683	22.6049	5876.96		19.1912	23.495	27.7989	21.5192	1.97581	1	1		20.0822	12.3205	27.8438	1077.72	1077.72		3.12346	44.5434	139.13	6197.3	0.173902	0.173902	0.0592694	7346.2
							5.45129	1.574	1.287	0.707452	1.58268	25.3236	32.5915	20.7061	26.6488	11557.2		17.3121	22.7634	28.2147	26.1442	3.38084	1	1		20.9047	16.243	25.5664	1304.62	1304.62		3.51354	38.764	136.199	5279.62	0.247105	0.247105	0.136814	14446.5
							4.98789	2.45242	1.72621	0.600504	1.75831	41.361	71.3978	29.1132	50.2555	32571.7		18.3263	23.3142	28.3021	17.3042	6.00995	0	0		#NUM!	#NUM!	#NUM!	#NUM!			2.63979	41.199	108.757	4480.66	#VALUE!		0.454337	40714.6
							5.03651	1.95161	1.4758	0.695069	1.46402	18.1637	26.806	13.7354	20.2707	5825.75		17.1776	22.2141	27.2506	22.5985	0.384359	1	1		20.2116	13.6953	26.7279	1149.97	1149.97		4.40724	44.7705	197.314	8833.86	0.130177	0.130177	0.0412175	7282.19
							3.71015	1.99367	1.49684	0.741042	1.68702	15.1409	22.6634	11.3677	17.0155	3002.89		18.0851	21.7953	25.5054	20.8103	0.985	1	1		16.4049	10.9597	21.8501	752.322	752.322		3.48404	42.8197	149.186	6388.08	0.11777	0.11777	0.0293798	3753.61
							4.13128	2.29654	1.64827	0.515495	1.83866	45.9084	75.6694	32.9494	54.3094	32359.5		17.5561	21.6873	25.8186	21.5203	0.167017	1	1		54.265	32.9224	75.6076	7820.01	7820.01		4.1741	43.1033	179.917	7755.04			0.260794	40449.4
							4.61605	2.65308	1.82654	0.691912	1.62692	21.925	40.0468	15.0945	27.5706	8766.09		18.8258	23.4419	28.058	20.1371	3.30482	1	1		19.2487	10.5384	27.9591	925.647	925.647		4.15788	43.237	179.774	7772.91	0.119086	0.119086	0.0704859	10957.6
							3.95641	2.47554	1.73777	0.668991	1.76934	23.2123	40.3376	16.2945	28.316	8169.61		18.0562	22.0126	25.969	24.0324	2.01981	1	1		24.3481	14.0111	34.685	1526.74	1526.74		4.61122	43.9644	202.729	8912.88	0.171296	0.171296	0.057288	10212
							5.40208	1.93412	1.46706	0.696861	1.71288	33.3784	48.9682	25.318	37.1431	21040.4		18.664	24.066	29.4681	21.8531	2.21293	1	1		33.8836	23.0962	44.671	3241.28	3241.28		4.83193	43.817	211.721	9276.99	0.349389	0.349389	0.141751	26300.5
							4.89957	1.87678	1.43839	0.615636	1.61507	28.5043	41.0002	21.8461	31.4231	13786.9		18.8772	23.7768	28.6764	17.5802	6.19656	0	0		#NUM!	#NUM!	#NUM!	#NUM!			2.93385	45.1389	132.431	5977.79	#VALUE!		0.144147	17233.6
							5.06982	2.5302	1.7651	0.556808	1.43078	23.579	41.6193	16.449	29.0342	10903.8		17.7891	22.8589	27.9287	22.8376	0.021246	1	1		29.0339	16.4489	41.619	2150.69	2150.69		2.58426	44.3784	114.685	5089.55	0.422569	0.422569	0.133899	13629.7
							5.16587	2.55495	1.77747	0.730967	1.61511	23.5302	41.8243	16.3699	29.0971	11111.4		18.3518	23.5177	28.6835	20.7581	2.7596	1	1		24.5975	13.8385	35.3565	1537.12	1537.12		2.73974	42.1401	115.453	4865.2	0.315942	0.315942	0.142741	13889.2
							4.20295	2.24251	1.62126	0.774974	1.56714	14.1483	22.938	10.2287	16.5833	3097.98		18.745	22.948	27.1509	20.3212	2.62683	1	1		12.9454	7.98479	17.906	449.171	449.171		3.94067	39.7678	156.712	6232.09	0.0720739	0.0720739	0.0310689	3872.48
							4.45227	2.30064	1.65032	0.732681	1.59017	17.6263	29.0891	12.6439	20.8665	5144.5		16.5518	21.004	25.4563	23.288	2.28396	1	1		17.9117	10.8535	24.9699	851.405	851.405		2.3785	40.2574	95.7522	3854.73	0.220872	0.220872	0.083412	6430.62
							4.50685	1.69395	1.34697	0.597066	1.74434	33.9837	45.7752	27.0228	36.399	17513.9		17.7562	22.263	26.7699	19.6995	2.5635	1	1		29.9372	22.2255	37.6489	2628.78	2628.78		2.15942	36.8911	79.6633	2938.87			0.372462	21892.4
							5.10468	2.26081	1.6304	0.743826	1.44016	16.021	26.1207	11.5537	18.8372	4839.76		19.8931	24.9978	30.1025	20.3536	4.64419	1	1		7.81868	4.79555	10.8418	163.339	163.339		3.58718	46.8606	168.097	7877.15	0.0207358	0.0207358	0.0384003	6049.7
							4.4554	1.86191	1.43095	0.609639	1.53997	21.3917	30.6106	16.4404	23.5255	7044.03		15.8774	20.3328	24.7882	23.9124	3.57957	1	1		14.0073	9.78877	18.2258	560.485	560.485		3.37304	45.5842	153.757	7008.91	0.0799675	0.0799675	0.0628131	8805.03
							3.88427	2.10014	1.55007	0.540228	1.50694	19.5454	30.2967	14.426	22.3614	5333.37		20.4933	24.3776	28.2618	22.7576	1.61997	1	1		20.3238	13.1115	27.5361	1134.24	1134.24		2.27943	42.9538	97.9102	4205.61	0.269696	0.269696	0.0792597	6666.71
							3.97364	1.96295	1.48148	0.569985	1.56224	20.7719	30.7731	15.6769	23.225	6022.42		17.4731	21.4468	25.4204	20.8534	0.593399	1	1		22.9646	15.5012	30.428	1481.79	1481.79		2.69881	42.2651	114.066	4821	0.307362	0.307362	0.0780753	7528.02
							4.78855	2.05959	1.5298	0.763897	1.61604	19.4204	29.7093	14.4248	22.0671	6446.99		18.0024	22.791	27.5795	22.4661	0.324906	1	1		22.0162	14.3916	29.6408	1340.14	1340.14		2.5106	37.4482	94.0175	3520.78	0.380636	0.380636	0.114445	8058.74
							4.46621	2.67664	1.83832	0.538793	1.4953	23.6299	43.4394	16.229	29.8342	9891.57		18.898	23.3642	27.8304	23.7943	0.430028	1	1		29.6956	16.1536	43.2375	2194.22	2194.22		3.52314	43.335	152.676	6616.2	0.331644	0.331644	0.0934407	12364.5
							4.65111	1.71792	1.35896	0.704664	1.60471	20.6623	28.0792	16.3449	22.212	6706.14		20.0504	24.7015	29.3526	22.7192	1.98229	1	1		20.0937	14.7861	25.4013	1179.93	1179.93		2.35673	41.0837	96.8232	3977.85	0.296626	0.296626	0.105367	8382.67
							4.58252	2.18402	1.59201	0.744953	1.61526	18.8105	29.9465	13.7116	21.8291	5911.4		18.0832	22.6657	27.2483	21.007	1.65875	1	1		20.3488	12.7818	27.9158	1120.97	1120.97		3.11992	46.0629	143.713	6619.81	0.169336	0.169336	0.0558117	7389.26
							5.43744	2.21085	1.60542	0.705465	1.62034	27.3598	43.924	19.8675	31.8958	14907		17.2031	22.6405	28.078	17.4228	5.2177	1	1		8.9759	5.59099	12.3608	217.113	217.113		5.47687	42.3647	232.026	9829.68	0.0220875	0.0220875	0.0947831	18633.8
							4.95044	2.05791	1.52896	0.642101	1.68081	30.9703	47.3521	23.0098	35.181	16945.2		18.6079	23.5583	28.5088	24.18	0.621681	1	1		34.9025	22.8276	46.9773	3368.98	3368.98		2.72096	40.7568	110.898	4519.84	0.745377	0.745377	0.234317	21181.5
							4.33956	2.19339	1.59669	0.473647	1.64712	38.4164	61.3392	27.9655	44.6524	23386		18.5822	22.9218	27.2613	19.4004	3.52137	1	1		26.0953	16.3433	35.8472	1840.54	1840.54		3.02251	41.4021	125.138	5180.98	0.35525	0.35525	0.282114	29232.5
							5.93949	2.45764	1.72882	0.733997	1.37683	17.7925	30.76	12.5161	21.638	7183.8		19.6261	25.5656	31.5051	24.8659	0.699701	1	1		21.4874	12.4289	30.5458	1192.71	1192.71		2.03509	41.7575	84.9804	3548.57	0.336111	0.336111	0.126526	8979.75
							4.18651	2.64185	1.82093	0.559506	1.79029	36.7108	66.8478	25.3033	46.0756	22246.7		18.4611	22.6476	26.8341	24.1337	1.48608	1	1		43.075	23.6555	62.4945	4644.35	4644.35		2.7568	42.4547	117.039	4968.85			0.279828	27808.4
							4.01731	1.94169	1.47085	0.634617	1.48832	15.5873	22.9265	11.8075	17.367	3416.5		19.1917	23.209	27.2263	17.4778	5.73121	0	0		#NUM!	#NUM!	#NUM!	#NUM!			3.38171	40.3171	136.341	5496.86	#VALUE!		0.038846	4270.63
							5.35108	2.56144	1.78072	0.805629	1.53607	18.3282	32.6374	12.7418	22.6896	6991		17.4192	22.7703	28.1214	23.6382	0.867827	1	1		22.3893	12.5732	32.2054	1272.1	1272.1		3.64471	42.0614	153.302	6448.1	0.197284	0.197284	0.0677622	8738.75
							4.50905	2.44203	1.72102	0.817635	1.55873	14.3165	24.6389	10.0895	17.3642	3521.48		18.1929	22.7019	27.211	24.0635	1.36158	1	1		16.5536	9.61851	23.4887	709.768	709.768		4.47606	41.2246	184.524	7606.93	0.0933055	0.0933055	0.0289331	4401.85
							4.80873	1.56506	1.28253	0.554584	1.48411	24.6708	31.6411	20.2172	25.9291	9663.86		18.9406	23.7493	28.558	21.687	2.06234	1	1		23.4234	18.2635	28.5834	1640.01	1640.01		4.21733	40.8458	172.26	7036.12	0.233085	0.233085	0.0858416	12079.8
							4.24974	2.66687	1.83344	0.71511	1.40879	12.3137	22.5763	8.46547	15.5209	2551.62		17.667	21.9167	26.1665	19.9474	1.96929	1	1		13.7539	7.50171	20.0061	471.49	471.49		2.86043	40.3766	115.494	4663.28	0.101107	0.101107	0.0341983	3189.53
							4.68845	2.28144	1.64072	0.590031	1.69858	33.8051	55.4648	24.3113	39.8881	19861.2		16.8611	21.5496	26.238	24.5998	3.05027	1	1		30.2921	18.4626	42.1215	2443.13	2443.13		2.70685	46.3088	125.351	5804.84	0.420879	0.420879	0.213843	24826.5
							5.4826	2.33667	1.66834	0.69463	1.57232	25.7475	42.9554	18.3832	30.6693	13601.1		21.2767	26.7593	32.2419	22.0187	4.74059	1	1		15.4069	9.23488	21.5789	626.051	626.051		2.98493	48.2494	144.021	6948.94	0.090093	0.090093	0.122331	17001.4
							4.44449	1.74943	1.37471	0.576149	1.5119	21.9529	30.179	17.2508	23.7149	7269.17		17.436	21.8804	26.3249	23.7001	1.81964	1	1		21.6362	15.7387	27.5337	1361.4	1361.4		3.60171	43.4961	156.66	6814.12	0.19979	0.19979	0.0666738	9086.46
							4.85428	2.24612	1.62306	0.574695	1.48023	23.5351	38.1988	17.0066	27.6027	9906.97		16.8651	21.7194	26.5737	21.2263	0.493076	1	1		27.4599	16.9186	38.0012	2019.82	2019.82		3.02349	46.6134	140.935	6569.48	0.307455	0.307455	0.0942519	12383.7
							4.5137	2.23574	1.61787	0.637851	1.57008	21.5909	34.9314	15.624	25.2777	7739.13		20.0595	24.5732	29.0869	26.4823	1.90912	1	1		22.9053	14.1577	31.653	1407.85	1407.85		4.28727	43.7477	187.558	8205.23	0.17158	0.17158	0.0589497	9673.91
							3.99656	2.04735	1.52367	0.589745	1.61761	22.0938	33.6637	16.4426	25.0531	6949.73		17.5864	21.5829	25.5795	22.283	0.700043	1	1		24.6658	16.1884	33.1432	1685.58	1685.58		5.10104	45.2766	230.958	10457	0.161191	0.161191	0.0415376	8687.17
							5.60057	2.44918	1.72459	0.678921	1.66564	33.6058	57.9562	23.6635	40.8099	24130.3		19.063	24.6636	30.2642	21.3301	3.33351	1	1		32.7936	19.0153	46.572	2782.13	2782.13		2.51893	43.6247	109.888	4793.82	0.580358	0.580358	0.314601	30162.8
							4.76817	1.75379	1.3769	0.682161	1.55973	20.7555	28.5781	16.2951	22.4366	6975.76		19.342	24.1102	28.8784	22.2211	1.88906	1	1		20.6007	14.9617	26.2397	1233.36	1233.36		4.40906	46.0254	202.929	9339.89	0.132052	0.132052	0.0466799	8719.7
							4.65157	2.47588	1.73794	0.703997	1.74204	26.8238	46.6181	18.8289	32.7235	12827.1		16.8593	21.5108	26.1624	24.1556	2.64475	1	1		26.9195	15.4893	38.3496	1866.14	1866.14		2.59287	44.0448	114.202	5030.02	0.371	0.371	0.159382	16033.9
							5.00983	2.5061	1.75305	0.662731	1.60077	25.4832	44.6732	17.8258	31.2495	12533.4		17.7795	22.7894	27.7992	18.9903	3.79911	1	1		20.3706	11.6201	29.121	1063.08	1063.08		3.75577	42.3702	159.133	6742.49	0.157669	0.157669	0.116179	15666.8
							4.61511	2.17649	1.58824	0.585855	1.72936	35.4962	56.3767	25.9026	41.1396	21172.6		19.3998	24.0149	28.63	22.5504	1.46456	1	1		39.0132	24.5637	53.4627	4125.68	4125.68		3.0289	44.0289	133.359	5871.66	0.702643	0.702643	0.225369	26465.8
							5.07641	2.00833	1.50417	0.696228	1.52345	20.6273	31.0268	15.4491	23.2379	7644.44		17.9142	22.9906	28.067	24.7664	1.77586	1	1		21.7696	14.4729	29.0664	1321.59	1321.59		3.96125	40.4853	160.373	6492.74	0.203549	0.203549	0.0735864	9555.55
							4.00875	2.13323	1.56661	0.642978	1.41613	13.3523	20.918	9.80578	15.3619	2583.21		18.3584	22.3671	26.3759	21.7431	0.624027	1	1		15.1746	9.68624	20.663	628.779	628.779		2.93489	42.212	123.887	5229.54	0.120236	0.120236	0.0308728	3229.02
							4.42746	2.42519	1.7126	0.669434	1.70083	24.8567	42.5696	17.5531	30.0613	10393.4		17.2652	21.6926	26.1201	23.5916	1.89896	1	1		27.1559	15.8565	38.4552	1915.64	1915.64		3.18948	42.8506	136.671	5856.43	0.3271	0.3271	0.110918	12991.7
							4.83854	1.91352	1.45676	0.728031	1.77258	28.7118	41.8263	21.8582	31.8423	13897.2		17.249	22.0875	26.926	18.0714	4.01605	1	1		17.7598	12.1913	23.3283	893.477	893.477		3.76201	43.4442	163.437	7100.4	0.125835	0.125835	0.122328	17371.6
							4.56178	1.67395	1.33698	0.703967	1.52599	17.3168	23.1522	13.8308	18.4915	4589.07		16.5501	21.1118	25.6736	20.9637	0.148193	1	1		18.4817	13.8235	23.14	1004.92	1004.92		3.09509	45.4728	140.742	6399.95	0.15702	0.15702	0.0448155	5736.33
							4.36908	2.39394	1.69697	0.643565	1.59506	21.221	36.0115	15.0428	25.5271	7435.47		17.3849	21.754	26.123	17.6242	4.12979	1	1		8.33209	4.90997	11.7542	181.31	181.31		2.5997	39.0795	101.595	3970.27	0.0456669	0.0456669	0.117049	9294.34
							5.30568	1.73036	1.36518	0.571598	1.60891	36.0463	49.2096	28.439	38.8243	23326.8		16.1112	21.4169	26.7226	19.8375	1.57941	1	1		37.0642	27.1497	46.9786	4006.96	4006.96		3.22213	46.0427	148.356	6830.69	0.586611	0.586611	0.213437	29158.4
							4.84805	2.04856	1.52428	0.808569	1.4494	13.4096	20.44	9.97772	15.2088	3106.19		18.2941	23.1421	27.9902	19.0923	4.0498	1	1		8.3607	5.48502	11.2364	193.622	193.622		4.40405	42.62	187.701	7999.8	0.0242033	0.0242033	0.0242677	3882.74
							4.32045	1.8551	1.42755	0.601525	1.52198	20.1018	28.6964	15.4689	22.0826	6025.13		17.9219	22.2423	26.5628	23.6901	1.44775	1	1		20.8059	14.5746	27.0373	1237.97	1237.97		2.76342	48.0946	132.906	6392.06	0.193673	0.193673	0.0589122	7531.41
							4.66618	2.44409	1.72204	0.518022	1.55868	30.7568	52.9646	21.6705	37.3175	16825.4		18.7758	23.442	28.1082	20.7046	2.73745	1	1		30.2211	17.5495	42.8926	2364.82	2364.82		1.69009	42.8004	72.3366	3096.04	0.763821	0.763821	0.339656	21031.8
							4.89218	2.30576	1.65288	0.671726	1.6131	24.6031	40.666	17.6367	29.1513	11023		17.5425	22.4347	27.3269	23.3011	0.86643	1	1		28.6905	17.3579	40.0231	2182.51	2182.51		2.4018	47.6273	114.392	5448.17	0.400596	0.400596	0.126453	13778.7
							5.0523	2.26758	1.63379	0.686024	1.65625	27.3032	44.6076	19.6719	32.1398	13928.2		19.0845	24.1368	29.1891	20.875	3.2618	1	1		24.5441	15.0228	34.0655	1607.74	1607.74		3.72539	40.7606	151.849	6189.45	0.259755	0.259755	0.140644	17410.2
							4.66468	1.70588	1.35294	0.587282	1.49579	22.1907	30.0227	17.5995	23.8111	7743.23		21.4029	26.0676	30.7323	22.6504	3.4172	1	1		16.2081	11.9799	20.4363	769.138	769.138		3.66417	36.8081	134.871	4964.34	0.154933	0.154933	0.0974857	9679.04
							4.26407	2.4888	1.7444	0.700027	1.70659	21.8363	38.0913	15.305	26.6981	7809.69		18.564	22.828	27.0921	26.8106	3.98258	1	1		9.53945	5.46861	13.6103	233.827	233.827		3.89725	46.9379	182.929	8586.28	0.0272326	0.0272326	0.0568471	9762.11
							4.08714	2.27242	1.63621	0.540843	1.61992	26.476	43.3202	19.0635	31.1919	10603.8		17.0579	21.1451	25.2322	22.2915	1.14638	1	1		29.9398	18.2982	41.5813	2390.32	2390.32		3.89098	41.1109	159.962	6576.16	0.363483	0.363483	0.100779	13254.8
							4.15318	2.06942	1.53471	0.634364	1.56398	18.8918	28.9934	14.0104	21.5019	5300.07		17.9733	22.1265	26.2797	23.6101	1.48362	1	1		20.0832	13.086	27.0804	1113.3	1113.3		3.24279	41.6282	134.991	5619.45	0.198115	0.198115	0.0589478	6625.09
							4.85776	2.49486	1.74743	0.668241	1.67091	27.5104	48.0725	19.2686	33.6706	14136.2		15.7252	20.583	25.4407	22.8378	2.25483	1	1		29.8236	17.0671	42.5801	2283.05	2283.05		2.76448	47.6785	131.806	6284.33	0.363293	0.363293	0.14059	17670.3
							4.87955	1.90674	1.45337	0.691682	1.5708	21.5169	31.272	16.4008	23.8364	7862.3		16.8776	21.7571	26.6367	25.9416	4.18448	1	1		12.2613	8.43644	16.0861	426.344	426.344		2.32033	40.6397	94.2975	3832.22	0.111253	0.111253	0.128227	9827.88
							4.13194	2.34345	1.67172	0.64396	1.5056	16.4234	27.4554	11.7158	19.5856	4175.46		18.5187	22.6506	26.7826	23.4855	0.834832	1	1		19.1817	11.4742	26.8892	969.282	969.282		3.99525	44.4081	177.421	7878.94	0.123022	0.123022	0.033122	5219.32
							5.50546	2.15107	1.57553	0.583023	1.70234	45.7047	72.0093	33.4761	52.7427	41693.4		18.0039	23.5094	29.0148	22.2197	1.28964	1	1		51.2753	32.5447	70.0058	7157.55	7157.55		2.93393	45.0233	132.095	5947.37			0.438149	52116.7
							4.33974	2.24978	1.62489	0.627951	1.76707	30.4453	49.4702	21.9889	35.7295	14830.7		18.6175	22.9572	27.2969	16.0595	6.89774	0	0		#NUM!	#NUM!	#NUM!	#NUM!			4.20977	39.9426	168.149	6716.3	#VALUE!		0.13801	18538.4
							5.29588	2.11336	1.55668	0.6047	1.71945	41.726	64.9541	30.7349	47.8445	33214.5		18.4538	23.7497	29.0455	23.7882	0.038581	1	1		47.8432	30.7341	64.9524	6271.42	6271.42		2.65125	45.4944	120.617	5487.4			0.378303	41518.1
							4.67095	2.26118	1.63059	0.725689	1.64807	21.5138	35.0802	15.5141	25.2971	7986.25		17.4958	22.1667	26.8377	23.2109	1.04418	1	1		24.6569	15.1215	34.1924	1624.33	1624.33		4.03614	40.3737	162.954	6579.05	0.246894	0.246894	0.0758682	9982.82
							4.20002	2.35847	1.67923	0.708264	1.5983	17.2018	28.8858	12.2477	20.5667	4668.09		19.2058	23.4058	27.6058	24.663	1.2572	1	1		19.6237	11.6861	27.5613	1011.86	1011.86		4.00169	43.1869	172.821	7463.59	0.135573	0.135573	0.0390905	5835.11
							4.5887	1.93983	1.46992	0.721609	1.59288	19.0416	27.9896	14.4289	21.2092	5821.96		18.0695	22.6582	27.2469	23.1927	0.534452	1	1		21.0649	14.3307	27.7991	1251.55	1251.55		4.66003	43.4401	202.432	8793.69	0.142323	0.142323	0.0413788	7277.44
							5.04204	1.76265	1.38132	0.678299	1.53326	21.6646	29.9259	16.9778	23.4518	8047.94		17.5612	22.6032	27.6453	20.9717	1.63151	1	1		22.1901	16.0644	28.3159	1429.04	1429.04		2.50925	38.2604	96.0047	3673.18	0.389047	0.389047	0.136938	10059.9
							4.46269	2.48039	1.74019	0.643643	1.59464	21.929	38.1606	15.3849	26.7728	8231.11		19.5186	23.9813	28.444	23.7982	0.183115	1	1		26.7502	15.372	38.1285	1841.32	1841.32		2.0414	42.3511	86.4557	3661.49	0.502889	0.502889	0.140501	10288.9
							4.43324	2.39512	1.69756	0.6481	1.5563	19.9359	33.8425	14.1297	23.9861	6659.89		16.3259	20.7592	25.1924	22.5343	1.77508	1	1		21.9794	12.9476	31.0112	1261.42	1261.42		3.07495	37.9227	116.611	4422.18	0.285248	0.285248	0.0941262	8324.87
							5.37877	1.92279	1.46139	0.57867	1.56254	32.5788	47.6104	24.7611	36.1858	19920.7		18.6978	24.0766	29.4554	24.5074	0.430838	1	1		36.0695	24.6816	47.4574	3679.82	3679.82		3.11825	42.073	131.194	5519.71	0.666669	0.666669	0.225563	24900.9
							4.55479	1.55666	1.27833	0.491524	1.54721	31.3355	40.0571	25.7327	32.8949	14749.7		15.1558	19.7106	24.2654	20.4933	0.782731	1	1		32.4056	25.3499	39.4612	3142.65	3142.65		2.9497	44.1797	130.317	5757.37	0.545849	0.545849	0.160118	18437.1
							4.99657	2.22871	1.61436	0.578053	1.59596	31.2567	50.4595	22.6406	36.5501	17933		18.9084	23.905	28.9016	23.1902	0.714751	1	1		36.1742	22.4078	49.9405	3515.62	3515.62		3.42216	37.215	127.356	4739.54	0.741764	0.741764	0.236481	22416.3
							4.85893	2.48217	1.74109	0.692027	1.53743	20.0128	34.844	14.0377	24.4408	7466.43		20.0673	24.9263	29.7852	23.9481	0.97813	1	1		23.9405	13.7503	34.1306	1474.37	1474.37		4.76582	42.7725	203.846	8719	0.169099	0.169099	0.0535213	9333.04
							5.32686	1.86	1.43	0.6937	1.68211	30.8443	44.1072	23.7136	33.9104	17503.7		18.8655	24.1924	29.5192	20.3317	3.86066	1	1		23.3646	16.3389	30.3903	1559.94	1559.94		1.85384	43.1226	79.9423	3447.32	0.452507	0.452507	0.317342	21879.6
							5.59312	2.11519	1.5576	0.729781	1.64382	28.438	44.295	20.9413	32.6182	16299.1		17.2591	22.8522	28.4454	24.6907	1.83849	1	1		30.8057	19.7777	41.8337	2599.27	2599.27		3.64257	41.1201	149.783	6159.08	0.422022	0.422022	0.165397	20373.9
							5.43881	2.11958	1.55979	0.571979	1.64882	40.9965	63.9459	30.1691	47.0575	32963.2		16.5168	21.9556	27.3944	18.1715	3.78403	1	1		33.8009	21.6701	45.9316	3126.96	3126.96		4.24375	44.0684	187.016	8241.49	0.379418	0.379418	0.249979	41204
							4.9921	2.43084	1.71542	0.712701	1.6315	23.9461	41.0776	16.8985	28.9881	10886.5		18.9948	23.9869	28.979	22.0031	1.98374	1	1		26.6011	15.507	37.6951	1836.38	1836.38		4.28764	36.1613	155.046	5606.67	0.327535	0.327535	0.121356	13608.1
							4.27348	2.61056	1.80528	0.626924	1.7695	29.8535	53.8938	20.6446	37.2692	14937.5		17.0867	21.3602	25.6337	20.9165	0.443678	1	1		37.0678	20.533	53.6026	3457.71	3457.71		4.3704	36.4698	159.388	5812.85	0.59484	0.59484	0.160608	18671.8
							5.17747	2.13921	1.56961	0.666815	1.60502	26.8314	42.1148	19.6871	30.9009	13486		17.6176	22.7951	27.9726	21.769	1.02608	1	1		30.288	19.2966	41.2794	2502.44	2502.44		2.8468	41.5328	118.235	4910.65	0.509595	0.509595	0.171642	16857.5
							4.64608	1.97364	1.48682	0.589062	1.58385	26.3385	39.1607	19.8418	29.5013	11341.5		17.0906	21.7367	26.3828	22.3988	0.662138	1	1		29.2001	19.6393	38.761	2391.5	2391.5		3.96045	43.8668	173.732	7621.06	0.313802	0.313802	0.0930108	14176.8
							4.5163	2.63142	1.81571	0.615434	1.56328	22.5516	40.9471	15.5608	28.254	9040.43		19.5488	24.0651	28.5814	24.2979	0.232842	1	1		28.2164	15.5402	40.8926	1996.41	1996.41		3.23522	38.989	126.138	4917.99	0.405941	0.405941	0.11489	11300.5
							4.32487	2.63074	1.81537	0.720926	1.40581	12.4118	22.5321	8.56493	15.5485	2622.09		17.9519	22.2768	26.6016	27.5042	5.22741	1	0		#NUM!	#NUM!	#NUM!	#NUM!			5.47624	43.5334	238.399	10378.3	#VALUE!		0.0157906	3277.61
							5.1812	2.42177	1.71088	0.560193	1.6882	42.7524	73.1444	30.2029	51.6736	35959.2		20.3326	25.5138	30.695	18.3046	7.20912	0	0		#NUM!	#NUM!	#NUM!	#NUM!			2.90091	37.2667	108.107	4028.81	#VALUE!		0.557844	44948.9
							4.42466	2.07835	1.53917	0.566054	1.7165	34.1091	52.4998	25.2604	38.8801	18434.3		19.8037	24.2284	28.653	25.7383	1.50997	1	1		36.5461	23.744	49.3482	3681.07	3681.07		4.50309	36.2611	163.287	5920.97	0.621701	0.621701	0.194587	23042.9
							4.58871	2.52098	1.76049	0.663098	1.44129	16.2499	28.6077	11.3479	19.9778	4679.91		15.5526	20.1413	24.73	22.7234	2.58208	1	1		16.5148	9.38082	23.6488	696.948	696.948		3.33016	40.6345	135.319	5498.63	0.126749	0.126749	0.0531941	5849.89
							4.72452	2.22647	1.61323	0.659826	1.62727	24.615	39.7097	17.8353	28.7725	10512		16.4918	21.2164	25.9409	19.3716	1.8448	1	1		26.4884	16.4194	36.5573	1885.74	1885.74		3.74357	47.5827	178.129	8475.85	0.222484	0.222484	0.0775142	13140
							5.56776	1.91978	1.45989	0.646314	1.73355	41.8099	61.0379	31.7942	46.4161	33945.2		19.2466	24.8144	30.3821	20.6088	4.20559	1	1		30.4176	20.8355	39.9997	2618.25	2618.25		1.86004	47.9806	89.2459	4282.07	0.611446	0.611446	0.495455	42431.4
							5.35462	1.62132	1.31066	0.711011	1.509	21.0461	27.5843	17.0135	22.2989	7894.68		19.8125	25.1672	30.5218	23.6417	1.5255	1	1		21.3748	16.3084	26.4412	1354.7	1354.7		2.33165	42.3899	98.8383	4189.75	0.323337	0.323337	0.117768	9868.35
							5.25303	2.48342	1.74171	0.684104	1.60451	26.3302	45.8594	18.4663	32.1629	13975.5		17.766	23.019	28.2721	20.4417	2.57736	1	1		28.0255	16.0908	39.9601	2020.01	2020.01		2.70058	41.1017	110.998	4562.22	0.442769	0.442769	0.191457	17469.4
							4.16033	2.54037	1.77019	0.655744	1.79288	27.4532	48.5974	19.13	33.8637	12150.8		18.7887	22.949	27.1094	18.6101	4.33891	0	1		#NUM!	#NUM!	#NUM!	#NUM!			2.8654	41.4463	118.76	4922.18	#VALUE!		0.154287	15188.6
							5.32535	1.64928	1.32464	0.697473	1.52242	22.0811	29.2495	17.7347	23.4921	8678.39		19.0761	24.4015	29.7268	25.3707	0.969212	1	1		23.0997	17.4385	28.761	1575.66	1575.66		3.54359	37.8084	133.978	5065.49	0.311057	0.311057	0.107077	10848
							4.90805	2.26218	1.63109	0.743509	1.50716	17.191	28.0401	12.3952	20.2176	5359.09		16.0011	20.9092	25.8172	19.469	1.4402	1	1		19.3276	11.8495	26.8057	997.88	997.88		2.39687	40.3911	96.812	3910.34	0.25519	0.25519	0.0856557	6698.86
							4.9373	2.66854	1.83427	0.605816	1.62821	30.447	55.8479	20.9283	38.3881	18129.3		18.3365	23.2738	28.2111	23.2667	0.0070384	1	1		38.3881	20.9283	55.8479	3671.89	3671.89		2.86748	42.1579	120.887	5096.34	0.720496	0.720496	0.222332	22661.6
							4.56997	1.97187	1.48594	0.719392	1.55984	17.8843	26.5749	13.477	20.0259	5141.93		17.4225	21.9924	26.5624	22.2234	0.230952	1	1		20.0003	13.4597	26.5409	1122.28	1122.28		3.88136	36.2672	140.766	5105.19	0.219832	0.219832	0.0629498	6427.42
							4.72693	1.72906	1.36453	0.701599	1.56302	19.7218	26.911	15.564	21.2375	6219.85		17.9789	22.7058	27.4328	23.9642	1.25836	1	1		20.4711	15.0023	25.9399	1222.58	1222.58		3.21681	43.9402	141.347	6210.83	0.196847	0.196847	0.0625908	7774.81
							4.21819	1.94415	1.47207	0.603806	1.41717	15.7186	23.139	11.9019	17.5204	3649.51		18.7045	22.9227	27.1409	22.8444	0.0782947	1	1		17.5174	11.8998	23.135	864.886	864.886		4.27648	42.9699	183.76	7896.15	0.109533	0.109533	0.0288868	4561.89
							5.12016	2.35847	1.67924	0.735722	1.57591	21.2724	35.7214	15.146	25.4337	8702.84		18.9398	24.06	29.1801	23.9449	0.115122	1	1		25.4273	15.1422	35.7124	1698.86	1698.86		2.52967	43.416	109.828	4768.28	0.356284	0.356284	0.114072	10878.5
							4.45686	2.25507	1.62753	0.554632	1.82835	45.1548	73.4909	32.5892	53.0401	33534.1		18.7856	23.2425	27.6993	22.8227	0.419724	1	1		52.8043	32.4444	73.1643	7457.42	7457.42		2.50966	43.5201	109.221	4753.29			0.440933	41917.6
							4.82253	1.88864	1.44432	0.781869	1.64751	20.034	28.9355	15.3208	22.1281	6716.39		17.4522	22.2747	27.0972	21.4304	0.844275	1	1		21.7864	15.0842	28.4886	1350.03	1350.03		2.84715	40.8415	116.282	4749.12	0.284268	0.284268	0.0883898	8395.48
							5.25345	2.01788	1.50894	0.717982	1.61957	25.1101	37.8896	18.777	28.3333	11742		20.2408	25.4942	30.7477	22.5194	2.97488	1	1		23.3528	15.4763	31.2294	1518.38	1518.38		2.76461	40.9294	113.154	4631.33	0.32785	0.32785	0.158458	14677.4
							4.31408	1.83073	1.41536	0.728544	1.71474	21.1117	29.8808	16.3218	23.1013	6609.94		20.313	24.6271	28.9412	22.1335	2.49358	1	1		18.8513	13.3191	24.3836	1020.28	1020.28		2.93241	39.2066	114.97	4507.57	0.226349	0.226349	0.0916505	8262.42
							5.3567	2.14984	1.57492	0.732623	1.58167	23.2587	36.6306	17.0388	26.8347	10503.4		18.0027	23.3594	28.7161	24.8251	1.46568	1	1		25.8106	16.3885	35.2327	1814	1814		2.66415	49.1685	130.992	6440.71	0.281646	0.281646	0.101924	13129.2
							4.7977	2.02691	1.51345	0.688496	1.56713	20.9556	31.7153	15.6471	23.6812	7479.74		19.153	23.9507	28.7484	22.767	1.18372	1	1		22.9491	15.1634	30.7348	1464.12	1464.12		2.99323	41.4259	123.997	5136.7	0.285032	0.285032	0.0910086	9349.68
							4.67554	1.66517	1.33258	0.536608	1.57008	29.9331	39.8883	23.9546	31.9214	14035.1		17.0427	21.7183	26.3938	22.5799	0.861567	1	1		31.3748	23.5443	39.2052	2899.88	2899.88		2.79698	40.9937	114.658	4700.27	0.616962	0.616962	0.186626	17543.9
							4.60713	1.56348	1.28174	0.742163	1.62446	19.4127	24.8821	15.9145	20.3983	5731.41		18.8015	23.4086	28.0157	22.4663	0.942278	1	1		19.9671	15.5781	24.3561	1191.99	1191.99		2.64123	47.4052	125.208	5935.52	0.200823	0.200823	0.0603507	7164.26
							4.99898	2.17203	1.58602	0.674716	1.64227	26.8153	42.5295	19.5805	31.055	13078.1		15.8745	20.8734	25.8724	25.6054	4.73196	1	1		10.0138	6.31381	13.7138	272.019	272.019		3.17191	44.9207	142.484	6400.5	0.0424997	0.0424997	0.127706	16347.6
							4.64113	2.31968	1.65984	0.586458	1.4326	19.3655	32.1436	13.8569	23.0002	6494.32		16.0792	20.7203	25.3615	17.8814	2.83892	1	1		18.1955	10.9622	25.4288	875.736	875.736		2.88698	45.1305	130.291	5880.09	0.148932	0.148932	0.0690287	8117.9
							4.4085	2.12762	1.56381	0.689949	1.61044	19.8231	30.9995	14.57	22.7848	6255.41		17.1536	21.5621	25.9706	22.5511	0.988964	1	1		22.2041	14.1987	30.2094	1347.54	1347.54		3.38428	40.9304	138.52	5669.67	0.237675	0.237675	0.068957	7819.27
							5.01753	2.06015	1.53008	0.636444	1.63452	29.2226	44.7127	21.7036	33.2082	15296.9		18.6721	23.6896	28.7071	23.9426	0.253028	1	1		33.1659	21.676	44.6558	3040.93	3040.93		3.5315	42.4988	150.085	6378.43	0.476753	0.476753	0.149889	19121.1
							4.67519	2.04767	1.52383	0.666223	1.51768	19.2409	29.32	14.3187	21.8193	6166.18		19.89	24.5652	29.2404	21.9452	2.62001	1	1		18.0711	11.859	24.2833	904.702	904.702		3.30855	41.6722	137.875	5745.54	0.157462	0.157462	0.0670757	7707.72
							4.90853	2.44345	1.72172	0.68428	1.7238	29.8599	51.4105	21.0401	36.2253	16680.2		16.5302	21.4387	26.3473	22.0769	0.638132	1	1		35.9179	20.8616	50.9742	3340.78	3340.78		2.98679	43.9882	131.384	5779.32	0.578057	0.578057	0.180387	20850.3
							4.36047	1.73087	1.36544	0.491108	1.52985	28.2384	38.5577	22.2765	30.4171	11766.3		18.1409	22.5014	26.8618	23.8458	1.34445	1	1		28.9352	21.1912	36.6792	2441.89	2441.89		4.2406	40.7607	172.85	7045.48	0.346589	0.346589	0.104378	14707.9
							4.48774	2.23219	1.6161	0.677807	1.63769	22.1011	35.7175	16.0011	25.8593	8057.65		18.0762	22.5639	27.0517	24.2378	1.67386	1	1		23.9932	14.8464	33.1401	1545.7	1545.7		2.69066	43.2392	116.342	5030.54	0.307262	0.307262	0.100109	10072.1
							4.96783	1.84137	1.42069	0.699321	1.51149	19.3652	27.5119	14.941	21.2264	6415.28		17.409	22.3768	27.3446	20.0952	2.28167	1	1		18.8552	13.2719	24.4385	1018.96	1018.96		3.77689	46.0401	173.889	8005.84	0.127277	0.127277	0.0500828	8019.1
							4.39917	2.37944	1.68972	0.580792	1.61763	26.4522	44.6968	18.7846	31.7407	11603.8		18.6289	23.0281	27.4273	24.0611	1.03298	1	1		30.8532	18.2594	43.4471	2492.28	2492.28		2.60894	44.727	116.69	5219.2	0.477521	0.477521	0.138955	14504.7
							3.76559	2.62894	1.81447	0.754596	1.51252	11.3741	20.638	7.85031	14.2442	1916.63		17.7042	21.4698	25.2353	23.4736	2.00381	1	1		12.0599	6.64653	17.4734	364.856	364.856		2.62188	41.2275	108.094	4456.43	0.0818717	0.0818717	0.0268801	2395.79
							5.14292	2.26409	1.63205	0.587963	1.71331	41.0866	67.0552	29.6168	48.336	32087.1		18.233	23.3759	28.5188	21.1791	2.19681	1	1		43.7044	26.7789	60.63	5100.7	5100.7		3.91727	44.2382	173.293	7666.16	0.665353	0.665353	0.261597	40108.8
							4.37549	1.70556	1.35278	0.693453	1.67781	21.9918	29.75	17.443	23.5965	7133.19		18.1287	22.5042	26.8797	20.8441	1.66007	1	1		21.8322	16.1388	27.5257	1395.59	1395.59		3.81354	43.7552	166.862	7301.09	0.191148	0.191148	0.0610627	8916.48
							4.83381	2.16385	1.58192	0.707882	1.45435	16.3458	25.8579	11.95	18.9039	4692.44		17.5993	22.4331	27.2669	23.1448	0.711664	1	1		18.6979	11.8197	25.5761	949.712	949.712		2.85328	45.5886	130.077	5930.03	0.160153	0.160153	0.0494563	5865.54
							4.55555	2.35822	1.67911	0.684218	1.5693	19.592	32.8972	13.95	23.4236	6567.86		17.5085	22.0641	26.6196	23.1261	1.06202	1	1		22.7782	13.5656	31.9908	1363.37	1363.37		3.87072	42.0947	162.937	6858.77	0.198778	0.198778	0.0598491	8209.82
							5.60535	1.89642	1.44821	0.614233	1.45044	24.7069	35.7807	18.8675	27.3241	11888.2		16.3675	21.9729	27.5782	24.4595	2.48668	1	1		24.4882	16.9093	32.0671	1703.47	1703.47		3.043	43.1173	131.206	5657.26	0.301113	0.301113	0.131338	14860.2
							4.39135	1.71281	1.35641	0.738438	1.47465	13.8612	18.8014	10.9769	14.8892	2847.21		16.1919	20.5833	24.9746	21.0094	0.426106	1	1		14.8189	10.9251	18.7127	642.264	642.264		2.13117	46.3019	98.6775	4568.96	0.140571	0.140571	0.0389478	3559.02
							4.51965	2.49821	1.7491	0.804329	1.41172	11.4374	20.0051	8.0078	14.0065	2274.63		17.9044	22.4241	26.9438	23.0855	0.661434	1	1		13.8557	7.92159	19.7898	492.496	492.496		3.67429	46.3124	170.165	7880.77	0.0624934	0.0624934	0.0180394	2843.28
							5.09446	1.75536	1.37768	0.6021	1.58422	29.4613	40.5883	23.1225	31.8554	15020.4		16.3644	21.4588	26.5533	24.2728	2.81392	1	1		26.555	19.2752	33.8349	2048.86	2048.86		2.16148	40.328	87.168	3515.31	0.58284	0.58284	0.267054	18775.6
							5.43877	1.95229	1.47614	0.637527	1.63115	33.0067	48.7227	24.9567	36.8397	20776.4		16.1663	21.6051	27.0439	19.6109	1.99422	1	1		34.2739	23.2185	45.3293	3306.46	3306.46		2.98255	47.9707	143.075	6863.4	0.481753	0.481753	0.189195	25970.5
							4.01862	2.48918	1.74459	0.719439	1.72124	19.3158	33.6982	13.5378	23.618	5759.46		18.642	22.6607	26.6793	22.4266	0.234047	1	1		23.5779	13.5148	33.641	1428.33	1428.33		2.59316	44.9668	116.606	5243.4	0.272406	0.272406	0.0686513	7199.33
							4.42731	2.14863	1.57432	0.561673	1.59713	27.0441	42.5759	19.8154	31.1957	11734.3		16.8931	21.3204	25.7477	24.2748	2.95447	1	1		23.2334	14.7578	31.709	1470.12	1470.12		2.69017	41.7665	112.359	4692.85	0.313268	0.313268	0.156279	14667.8
							5.03714	2.38571	1.69285	0.589963	1.60474	31.2315	52.8703	22.1613	37.5158	18541.3		17.9023	22.9394	27.9765	21.0088	1.93061	1	1		34.6509	20.4689	48.8328	3140.19	3140.19		4.75052	46.0976	218.987	10094.8	0.311071	0.311071	0.114795	23176.6
							5.0257	2.01532	1.50766	0.712256	1.50733	19.0136	28.666	14.2241	21.4451	6437.81		19.7046	24.7303	29.756	20.1259	4.60436	1	1		8.59529	5.70109	11.4895	205.782	205.782		3.33933	42.4418	141.727	6015.15	0.0342107	0.0342107	0.0668916	8047.26
							4.92953	1.90777	1.45388	0.687236	1.60792	23.7625	34.5479	18.1091	26.3285	9688.89		16.6167	21.5463	26.4758	19.3996	2.14661	1	1		23.7011	16.302	31.1003	1592.77	1592.77		2.87686	45.8962	132.037	6060	0.262834	0.262834	0.0999267	12111.1
							5.8785	2.29779	1.64889	0.771156	1.65754	28.9841	47.7916	20.799	34.2953	18357.4		17.2742	23.1527	29.0312	25.4083	2.25565	1	1		31.6701	19.2069	44.1333	2663.01	2663.01		3.77325	40.5206	152.894	6195.37	0.429839	0.429839	0.185192	22946.7
							4.51707	1.52019	1.2601	0.59935	1.39865	16.8603	21.2456	13.9756	17.6106	4213.52		18.971	23.488	28.0051	24.3297	0.841689	1	1		17.3022	13.7308	20.8735	900.413	900.413		2.64654	40.6141	107.487	4365.5	0.206257	0.206257	0.0603242	5266.91
							4.63006	1.93958	1.46979	0.666059	1.59095	21.8622	32.1329	16.5669	24.3499	7743.31		17.7648	22.3949	27.0249	21.094	1.30082	1	1		23.3691	15.8996	30.8386	1540.39	1540.39		4.02058	41.8108	168.104	7028.54	0.219162	0.219162	0.068856	9679.14
							4.6293	1.68296	1.34148	0.624798	1.47127	19.0403	25.5422	15.177	20.3596	5637.77		16.2717	20.901	25.5303	22.458	1.557	1	1		19.1735	14.2928	24.0541	1080.08	1080.08		5.0535	46.0055	232.489	10695.8	0.100982	0.100982	0.0329439	7047.21
							3.94441	2.04895	1.52448	0.53399	1.49899	20.0356	30.5437	14.907	22.7254	5642.15		19.2202	23.1646	27.109	24.0677	0.903102	1	1		22.1217	14.511	29.7324	1355.43	1355.43		4.38959	36.5196	160.306	5854.33	0.231526	0.231526	0.0602348	7052.69
							4.69596	2.03268	1.51634	0.667853	1.43737	16.5012	25.0214	12.3096	18.6655	4543.9		16.4947	21.1907	25.8866	24.9918	3.80114	1	1		10.9602	7.22804	14.6923	333.626	333.626		2.19429	41.6795	91.457	3811.88	0.0875226	0.0875226	0.0745023	5679.88
							4.27158	2.26619	1.6331	0.685003	1.5312	16.4872	26.9251	11.8812	19.4032	4292.97		19.3187	23.5903	27.8619	24.1867	0.596397	1	1		19.2131	11.7648	26.6614	985.415	985.415		4.12919	45.4083	187.499	8514.03	0.11574	0.11574	0.0315139	5366.21
							4.65186	2.99181	1.99591	0.482752	1.59341	36.9622	73.7732	24.6583	49.2158	26585.1		20.3213	24.9732	29.625	24.1355	0.837643	1	1		48.4113	24.2553	72.5673	5529.65	5529.65		5.49238	47.2359	259.438	12254.8	0.451223	0.451223	0.135585	33231.4
							4.74358	1.78993	1.39496	0.652063	1.75881	32.792	45.7437	25.5562	35.6499	17421.4		18.1798	22.9234	27.667	26.8897	3.96627	1	1		19.5548	14.0181	25.0914	1105.01	1105.01		4.93002	47.0382	231.899	10908.1	0.101302	0.101302	0.0998191	21776.7
							4.51093	1.88584	1.44292	0.619138	1.55018	21.7267	31.3499	16.6238	23.9869	7385.56		20.213	24.724	29.2349	20.5335	4.19044	1	1		8.87993	6.15414	11.6057	224.383	224.383		2.92134	45.5228	132.988	6053.96	0.0370638	0.0370638	0.0762472	9231.96
							5.05746	1.71349	1.35674	0.708722	1.58782	22.6536	30.7351	17.9372	24.3361	8759.33		17.191	22.2484	27.3059	19.8472	2.40122	1	1		21.4182	15.7865	27.05	1341.54	1341.54		3.55611	41.3838	147.165	6090.25	0.220276	0.220276	0.089891	10949.2
							4.07723	2.77853	1.88926	0.664564	1.63309	19.3462	36.55	13.1545	24.8522	6158.52		18.5511	22.6284	26.7056	21.3256	1.30273	1	1		23.5495	12.4649	34.6341	1356.26	1356.26		5.07363	41.0009	208.024	8529.16	0.159015	0.159015	0.0451284	7698.14
							4.72097	2.43074	1.71537	0.758436	1.57111	17.6862	30.3383	12.4811	21.4097	5615.98		17.0782	21.7992	26.5202	26.2646	4.46542	1	1		6.94841	4.05068	9.84614	125.298	125.298		4.53275	43.5763	197.521	8607.23	0.0145573	0.0145573	0.0407796	7019.98
							4.96907	2.31116	1.65558	0.637353	1.66591	30.6067	50.6717	21.9248	36.2983	17343.1		19.3297	24.2987	29.2678	21.7473	2.55141	1	1		31.1481	18.814	43.4822	2570.06	2570.06		3.18779	44.1646	140.788	6217.82	0.413337	0.413337	0.174329	21678.9
							4.28136	2.83277	1.91639	0.622977	1.78328	31.1031	59.6055	21.0414	40.3234	16869.1		18.7343	23.0157	27.297	22.7059	0.309762	1	1		40.2178	20.9863	59.4493	3919.51	3919.51		3.72835	44.0022	164.056	7218.82	0.542957	0.542957	0.146052	21086.4
							4.63266	2.40155	1.70078	0.695072	1.60696	21.0775	35.8481	14.927	25.3876	7787.91		17.7081	22.3407	26.9734	20.8491	1.49159	1	1		24.0357	14.1322	33.9391	1506.81	1506.81		3.60108	46.1077	166.038	7655.61	0.196825	0.196825	0.0635801	9734.89
							5.16367	1.73674	1.36837	0.641693	1.60166	28.217	38.6113	22.2321	30.4217	13925.2		15.5804	20.7441	25.9078	22.089	1.34492	1	1		29.3717	21.4647	37.2786	2513.83	2513.83		3.41515	37.0046	126.376	4676.52	0.537542	0.537542	0.186106	17406.5
							4.58035	2.71294	1.85647	0.685487	1.59669	20.7544	38.5299	14.2023	26.3661	7874.16		20.593	25.1733	29.7537	22.6493	2.52399	1	1		22.0018	11.8514	32.1522	1197.1	1197.1		3.92951	38.8321	152.591	5925.43	0.202028	0.202028	0.0830547	9842.7
							3.87874	1.75511	1.37756	0.596284	1.74564	26.2799	36.202	20.6266	28.4143	9099.15		16.3444	20.2232	24.1019	20.8655	0.642356	1	1		28.0219	20.3418	35.7021	2281.56	2281.56		3.68467	41.7752	153.928	6430.35	0.354812	0.354812	0.0884396	11373.9
							4.3481	2.15127	1.57563	0.5645	1.55718	24.0242	37.8533	17.5958	27.7246	9098.37		18.0589	22.407	26.7551	22.8317	0.424709	1	1		27.592	17.5117	37.6723	2072.53	2072.53		3.57845	44.3092	158.558	7025.59	0.294997	0.294997	0.0809396	11373
							4.58622	1.78525	1.39262	0.695133	1.65449	22.6813	31.5865	17.6931	24.6398	8052.1		16.0842	20.6704	25.2566	25.5341	4.86368	1	0		#NUM!	#NUM!	#NUM!	#NUM!			2.62063	41.9451	109.922	4610.71	#VALUE!		0.109149	10065.1
							5.14371	2.40467	1.70233	0.54314	1.45932	26.5968	45.2767	18.8286	32.0527	13775.9		17.2842	22.4279	27.5716	22.1439	0.284031	1	1		32.0037	18.7999	45.2076	2670.04	2670.04		2.8389	42.7296	121.305	5183.3	0.515122	0.515122	0.166109	17219.9
							5.45094	1.99296	1.49648	0.755786	1.43809	17.1391	25.6483	12.8694	19.2589	5652.48		18.8341	24.2851	29.736	25.164	0.878932	1	1		19.0069	12.701	25.3127	1010.01	1010.01		4.69858	40.8902	192.126	7856.07	0.128565	0.128565	0.0449691	7065.6
							4.21408	1.88236	1.44118	0.685355	1.66383	20.5309	29.5887	15.7189	22.6538	6157.47		19.4633	23.6774	27.8915	22.0333	1.6441	1	1		20.8586	14.4733	27.2439	1238.76	1238.76		2.26684	41.9756	95.1522	3994.07	0.310149	0.310149	0.0963533	7696.84
							4.59792	1.87753	1.43877	0.746689	1.61674	18.8925	27.1819	14.4774	20.8296	5684.37		16.456	21.054	25.6519	20.0716	0.9824	1	1		20.3486	14.1431	26.5542	1179.85	1179.85		3.85403	48.0809	185.305	8909.65	0.132424	0.132424	0.0398751	7105.47
							4.75312	1.70865	1.35432	0.602925	1.63711	29.3779	39.7872	23.2857	31.5365	13834.4		17.8765	22.6296	27.3827	20.6753	1.95435	1	1		28.7473	21.2263	36.2683	2418.53	2418.53		4.77696	42.7024	203.988	8710.77	0.277648	0.277648	0.0992625	17293.1
							4.59183	1.8775	1.43875	0.661407	1.65427	24.6659	35.4881	18.9017	27.1949	9676.52		21.2869	25.8787	30.4705	22.7545	3.12427	1	1		19.9296	13.852	26.0072	1131.76	1131.76		4.10683	43.8972	180.278	7913.71	0.143013	0.143013	0.0764222	12095.7
							4.57464	2.13836	1.56918	0.525316	1.50015	25.7067	40.3383	18.8642	29.6012	10936.1		20.7229	25.2975	29.8722	20.7276	4.56989	1	1		1.34846	0.859341	1.83758	4.9609	4.9609		4.25339	36.8026	156.536	5760.91	0.000861132	0.000861132	0.118645	13670.1
							4.92249	2.05343	1.52672	0.607473	1.47599	21.9367	33.4912	16.3098	24.9005	8447.23		20.6953	25.6178	30.5402	23.6109	2.00686	1	1		22.7371	14.8928	30.5814	1430.82	1430.82		3.16732	41.8214	132.462	5539.74	0.258283	0.258283	0.0953027	10559
							4.94963	2.48984	1.74492	0.626706	1.49096	21.7846	38.0124	15.267	26.6397	9024.06		15.5734	20.523	25.4726	20.7763	0.253354	1	1		26.6048	15.247	37.9626	1818.4	1818.4		2.4232	44.6193	108.122	4824.31	0.376924	0.376924	0.116909	11280.1
							4.48254	2.01472	1.50736	0.629647	1.51411	19.5286	29.4367	14.6108	22.0238	6056.72		19.3694	23.8519	28.3345	24.8913	1.0394	1	1		21.4235	14.2126	28.6344	1278.53	1278.53		4.22939	37.2118	157.383	5856.5	0.21831	0.21831	0.0646367	7570.9
							4.63969	2.36043	1.68021	0.662535	1.57576	21.4763	36.0848	15.2874	25.6861	8040.74		18.5647	23.2044	27.8441	25.3122	2.10772	1	1		22.8827	13.6189	32.1464	1375.39	1375.39		2.64414	43.9494	116.208	5107.28	0.269299	0.269299	0.0983979	10050.9
							4.35742	2.11077	1.55539	0.657277	1.59156	20.2971	31.5698	14.9565	23.2632	6463.71		17.9644	22.3218	26.6793	23.0499	0.728086	1	1		22.9361	14.7463	31.126	1441.97	1441.97		2.79092	41.6195	116.157	4834.38	0.298273	0.298273	0.0835644	8079.64
							4.20581	1.88835	1.44417	0.639649	1.58504	19.7887	28.5784	15.1341	21.8562	5714.69		16.9644	21.1702	25.376	22.1796	1.00939	1	1		21.2174	14.6917	27.7431	1280.5	1280.5		3.381	47.6695	161.17	7682.92	0.166668	0.166668	0.0464886	7143.36
							5.07735	1.72895	1.36447	0.607231	1.65586	33.6642	45.9338	26.5675	36.2507	19465.8		17.9712	23.0486	28.1259	26.2442	3.19561	1	1		28.1702	20.6455	35.6949	2315.16	2315.16		4.80408	39.6316	190.394	7545.61	0.306822	0.306822	0.161234	24332.2
							3.71243	2.43545	1.71772	0.691006	1.51204	12.7073	21.8277	8.96251	15.3951	2281.64		19.3996	23.112	26.8245	22.1659	0.946135	1	1		14.8867	8.66656	21.1069	574.674	574.674		3.02206	36.9998	111.816	4137.16	0.138905	0.138905	0.0344686	2852.04
							3.88615	1.62329	1.31164	0.752684	1.41654	10.2298	13.4178	8.26581	10.8418	1354.06		19.0691	22.9553	26.8414	25.3452	2.38991	1	1		8.54922	6.51794	10.5805	216.654	216.654		3.85028	43.7763	168.551	7378.55	0.0293627	0.0293627	0.0114695	1692.57
							4.53676	2.24221	1.6211	0.619772	1.56381	22.4871	36.454	16.2581	26.356	8447.14		19.5032	24.04	28.5767	21.5979	2.44211	1	1		22.2117	13.7016	30.7219	1322.42	1322.42		3.82763	43.3018	165.743	7177	0.184258	0.184258	0.0735609	10558.9
							4.00396	2.86754	1.93377	0.688951	1.56489	15.7053	30.3705	10.5911	20.4808	4046.07		19.2701	23.2741	27.278	22.5939	0.680153	1	1		20.1832	10.4372	29.9291	981.358	981.358		4.94637	44.9381	222.28	9988.85	0.0982453	0.0982453	0.0253161	5057.59
							5.32736	2.72222	1.86111	0.685072	1.60563	26.931	50.1216	18.412	34.2668	15445		20.471	25.7984	31.1258	21.4755	4.32293	1	1		20.0259	10.7602	29.2916	990.176	990.176		4.38588	41.6531	182.686	7609.42	0.130125	0.130125	0.126858	19306.3
							5.68898	1.98332	1.49166	0.698499	1.61808	29.7757	44.4152	22.3943	33.4048	17776.8		19.5685	25.2575	30.9465	23.2886	1.96891	1	1		31.3404	21.0104	41.6704	2750.5	2750.5		3.47917	38.3837	133.543	5125.89	0.536589	0.536589	0.216753	22221
							4.24545	1.89036	1.44518	0.65403	1.65764	22.2099	32.0973	16.9795	24.5384	7268.86		19.376	23.6215	27.8669	23.8542	0.232736	1	1		24.5015	16.9539	32.049	1707.01	1707.01		2.92436	45.6328	133.446	6089.53	0.280318	0.280318	0.0746041	9086.07
							5.17697	2.45206	1.72603	0.676709	1.6524	28.8523	49.7999	20.3094	35.0546	16449.4		18.7843	23.9612	29.1382	25.16	1.19876	1	1		34.1019	19.7574	48.4464	3007.06	3007.06		2.97384	38.6471	114.93	4441.72	0.677002	0.677002	0.231462	20561.8
							5.79338	1.98936	1.49468	0.654504	1.58565	31.7424	47.4447	23.8492	35.647	20594.2		17.39	23.1834	28.9768	23.155	0.0283824	1	1		35.6466	23.8489	47.4442	3554.69	3554.69		3.26119	42.911	139.941	6005	0.591955	0.591955	0.214344	25742.7
							4.48622	1.77601	1.38801	0.630686	1.67294	26.6354	36.9702	20.8164	28.8933	10846.4		16.0767	20.5629	25.0492	17.5009	3.06202	1	1		21.1166	15.2136	27.0196	1291.4	1291.4		2.45751	40.1095	98.5696	3953.57	0.326642	0.326642	0.171466	13558.1
							4.29302	2.09949	1.54974	0.688719	1.59057	18.3679	28.4655	13.5583	21.0119	5205.2		20.108	24.4011	28.6941	21.3237	3.07735	1	1		14.6506	9.45355	19.8476	589.458	589.458		2.52983	44.997	113.835	5122.23	0.115079	0.115079	0.0635124	6506.49
							5.0309	2.56115	1.78057	0.585937	1.74462	42.5715	75.8016	29.5967	52.6992	35458.3		15.9673	20.9982	26.0291	21.9658	0.967613	1	1		51.7152	29.0442	74.3863	6787.37	6787.37		2.75314	44.9168	123.662	5554.49			0.398982	44322.8
							5.17784	1.71575	1.35787	0.670271	1.4961	21.3003	28.9231	16.8574	22.8902	7931.11		17.8647	23.0425	28.2204	20.5538	2.48867	1	1		20.0729	14.7826	25.3632	1177.89	1177.89		3.7574	43.1947	162.299	7010.47	0.168018	0.168018	0.0707077	9913.88
							4.06552	1.84959	1.42479	0.688641	1.48396	13.9418	19.8642	10.7398	15.302	2724.79		19.1395	23.205	27.2705	20.1662	3.03882	1	1		10.1652	7.13449	13.1959	295.768	295.768		2.61559	44.5742	116.588	5196.82	0.0569133	0.0569133	0.0327699	3405.99
							4.8915	2.26444	1.63222	0.657046	1.60333	24.9954	40.7981	18.0168	29.4074	11295.6		18.4516	23.3431	28.2346	22.712	0.6311	1	1		29.1617	17.8662	40.4571	2270.79	2270.79		3.0487	46.5527	141.925	6607.01	0.343694	0.343694	0.106853	14119.5
							5.05178	1.81042	1.40521	0.450343	1.75973	70.3956	98.9205	54.6396	76.78	85780.4		17.5183	22.57	27.6218	21.7244	0.845642	1	1		75.6967	53.8686	97.5247	16504.4	16504.4		3.20445	44.309	141.986	6291.26			0.852178	107225
							4.13057	2.40596	1.70298	0.609459	1.66837	24.3513	41.4698	17.2363	29.3531	9275.47		17.2622	21.3928	25.5233	26.022	4.62922	1	0		#NUM!	#NUM!	#NUM!	#NUM!			2.62147	48.7706	127.851	6235.37	#VALUE!		0.0929722	11594.3
							5.25964	1.69203	1.34601	0.690688	1.58546	24.9955	33.6442	19.884	26.7641	11054		19.4967	24.7563	30.016	20.8311	3.9252	1	1		17.8149	13.2353	22.3945	931.159	931.159		3.53729	43.0705	152.353	6561.91	0.141904	0.141904	0.105286	13817.5
							3.99607	2.82443	1.91222	0.576058	1.59592	22.0008	42.0703	14.8951	28.4827	7866.89		17.3967	21.3928	25.3889	24.0021	2.60931	1	1		21.5724	11.2814	31.8634	1129.29	1129.29		3.49248	38.8554	135.701	5272.73	0.214175	0.214175	0.0932498	9833.62
							4.99733	2.71628	1.85814	0.624411	1.84252	46.1626	85.7767	31.5787	58.6777	42525.7		16.9902	21.9875	26.9848	24.9454	2.95796	1	1		47.2946	25.4526	69.1365	5528.28	5528.28		4.4448	46.0052	204.484	9407.34	0.587656	0.587656	0.28253	53157.2
							4.384	2.27616	1.63808	0.617469	1.75354	31.0961	50.938	22.3789	36.6584	15700		19.648	24.032	28.416	19.8272	4.20477	1	1		10.3747	6.33343	14.4159	286.835	286.835		2.48089	44.6308	110.724	4941.71	0.0580437	0.0580437	0.198565	19625
							4.52999	2.53141	1.76571	0.780724	1.60202	16.7225	29.527	11.6643	20.5957	4901.44		16.2439	20.7739	25.3039	24.9848	4.21091	1	1		7.59291	4.30021	10.8856	147.059	147.059		2.33414	44.1817	103.126	4556.3	0.0322761	0.0322761	0.0672344	6126.81
							4.26984	2.1947	1.59735	0.605899	1.54123	20.2757	32.3874	14.7571	23.5723	6411.18		18.3309	22.6008	26.8706	23.7279	1.12712	1	1		22.7362	14.2337	31.2387	1396.88	1396.88		3.18996	46.024	146.815	6756.99	0.206731	0.206731	0.0593014	8013.98
							5.20692	2.2789	1.63945	0.714989	1.69426	28.9022	47.3837	20.7924	34.088	16116.2		17.0611	22.268	27.4749	23.0796	0.811638	1	1		33.6714	20.5382	46.8045	3019.95	3019.95		2.45466	41.9561	102.988	4320.99	0.698904	0.698904	0.23311	20145.3
							4.97168	2.82086	1.91043	0.504472	1.46952	28.8546	55.1248	19.5418	37.3333	16825.4		16.0772	21.0489	26.0206	25.5854	4.53654	1	1		15.2742	7.99514	22.5532	566.479	566.479		2.81432	40.9017	115.11	4708.21	0.120317	0.120317	0.223352	21031.7
							4.55916	2.07257	1.53628	0.535922	1.63146	32.8782	50.5102	24.3708	37.4405	17631.3		18.2449	22.8041	27.3632	21.5683	1.23575	1	1		36.039	23.4585	48.6194	3583.11	3583.11		3.80471	44.8542	170.657	7654.71	0.468092	0.468092	0.143958	22039.1
							5.8335	2.62801	1.814	0.754884	1.56917	24.7455	44.8884	17.0808	30.9846	14051.4		20.0631	25.8966	31.7301	22.3175	3.57907	1	1		24.4675	13.4881	35.4468	1502.03	1502.03		4.07563	43.9891	179.283	7886.51	0.190455	0.190455	0.111356	17564.3
							5.0228	1.98001	1.49	0.661562	1.60143	25.6956	38.2866	19.3366	28.8116	11682.1		16.3766	21.3994	26.4222	25.7763	4.37695	1	1		14.1333	9.4854	18.7812	559.665	559.665		3.56974	39.7405	141.863	5637.7	0.0992718	0.0992718	0.129509	14602.7
							4.79259	1.73111	1.36556	0.71127	1.57587	20.2145	27.604	15.9458	21.7749	6627.34		20.4662	25.2588	30.0514	16.3779	8.88092	0	0		#NUM!	#NUM!	#NUM!	#NUM!			3.13485	38.109	119.466	4552.72	#VALUE!		0.0909805	8284.18
							5.84768	2.72305	1.86153	0.636643	1.62499	36.7291	68.3721	25.1086	46.7404	31538.1		17.4521	23.2998	29.1475	22.7461	0.553656	1	1		46.5304	24.9958	68.0649	5344.92	5344.92		2.22241	44.6052	99.1307	4421.74			0.445781	39422.6
							5.04514	1.98321	1.49161	0.715576	1.45661	17.1999	25.6555	12.9363	19.2959	5260.33		18.2019	23.247	28.2921	26.3093	3.0623	1	1		15.3348	10.2807	20.3888	658.515	658.515		2.30412	46.861	107.973	5059.72	0.130148	0.130148	0.064978	6575.42
							4.60748	2.11984	1.55992	0.642132	1.42342	16.528	25.7823	12.1624	18.9724	4538.95		17.7179	22.3254	26.9328	24.256	1.93058	1	1		17.2266	11.0432	23.4099	812.168	812.168		4.04286	43.9695	177.763	7816.15	0.103909	0.103909	0.0362947	5673.69
							4.57106	1.92866	1.46433	0.682162	1.498	17.2798	25.3033	13.1196	19.2115	4767.23		19.4939	24.065	28.6361	20.1337	3.93133	1	1		9.80197	6.69382	12.9101	271.49	271.49		3.6348	42.3135	153.801	6507.86	0.0417173	0.0417173	0.0457834	5959.04
							4.55507	2.30661	1.6533	0.734347	1.61544	19.0717	31.5313	13.67	22.6006	6168.14		21.335	25.89	30.4451	22.2731	3.6169	1	1		13.7382	8.30955	19.1668	500.355	500.355		3.81876	39.9171	152.434	6084.72	0.0822313	0.0822313	0.0633568	7710.18
							5.40456	2.73386	1.86693	0.679515	1.69127	33.3499	62.2619	22.7744	42.5182	24075.7		15.9626	21.3672	26.7718	23.9226	2.55536	1	1		37.4654	20.0679	54.8628	3458.84	3458.84		2.43256	40.0708	97.4745	3905.88			0.385249	30094.7
							4.25165	2.13408	1.56704	0.725804	1.51739	14.6204	22.9109	10.7357	16.8233	3285.32		18.7572	23.0088	27.2605	25.3848	2.37596	1	1		13.9512	8.90289	18.9995	531.402	531.402		2.99994	44.5761	133.726	5960.97	0.0891469	0.0891469	0.0344462	4106.65
							4.88473	2.39589	1.69795	0.539834	1.65954	38.6793	65.6755	27.4117	46.5436	27626.7		20.2445	25.1292	30.014	23.4388	1.69038	1	1		43.6679	25.718	61.6177	4978.44	4978.44		4.08702	43.0135	175.797	7561.65	0.65838	0.65838	0.228346	34533.4
							4.03339	2.09839	1.54919	0.705213	1.47012	12.9836	20.1142	9.58554	14.8499	2443.09		19.2854	23.3188	27.3522	24.2839	0.965065	1	1		14.4185	9.30711	19.5299	571.039	571.039		3.23914	46.4629	150.499	6992.64	0.0816629	0.0816629	0.0218362	3053.86
							4.27737	2.31773	1.65886	0.562706	1.52196	21.9123	36.3495	15.6833	26.0164	7660.57		16.03	20.3073	24.5847	24.5959	4.28859	1	1		#NUM!	#NUM!	#NUM!	#NUM!			2.53938	44.8638	113.926	5111.16	#VALUE!		0.0936746	9575.71
							3.9611	1.96372	1.48186	0.620652	1.70485	23.5696	34.9269	17.786	26.3565	7730.44		17.8059	21.767	25.7281	22.0946	0.327596	1	1		26.2662	17.7251	34.8072	1938.24	1938.24		3.7752	41.0273	154.886	6354.57	0.305015	0.305015	0.0760323	9663.05
							4.80478	2.00096	1.50048	0.57576	1.54383	26.4567	39.6977	19.8393	29.7685	11888.2		16.8845	21.6893	26.4941	23.8287	2.13938	1	1		26.6548	17.7642	35.5454	1983.71	1983.71		3.05029	41.9271	127.89	5362.04	0.369954	0.369954	0.138569	14860.3
							4.89701	1.98509	1.49254	0.676358	1.57924	22.7909	34.0165	17.136	25.5763	8967.68		16.779	21.676	26.573	20.2343	1.4417	1	1		24.4427	16.3766	32.5089	1672.53	1672.53		2.75533	43.2408	119.143	5151.83	0.324649	0.324649	0.108792	11209.6
							5.11979	2.06503	1.53251	0.741984	1.67942	25.6324	39.282	19.0225	29.1523	12018.9		17.9649	23.0847	28.2045	24.3353	1.25059	1	1		28.2692	18.4463	38.0921	2207.47	2207.47		3.80154	41.3409	157.159	6497.11	0.339761	0.339761	0.115618	15023.6
							4.44427	2.11801	1.559	0.628446	1.47195	17.8021	27.7536	13.1036	20.4286	5077.63		15.8751	20.3194	24.7637	26.2443	5.92487	1	0		#NUM!	#NUM!	#NUM!	#NUM!			2.55577	44.7513	114.374	5118.38	#VALUE!		0.0620025	6347.04
							4.23727	2.13058	1.56529	0.501436	1.62977	32.403	50.72	23.8058	37.2629	16073		18.4175	22.6548	26.892	25.1607	2.50594	1	1		30.0478	19.1964	40.8993	2466.52	2466.52		3.58344	40.8374	146.338	5976.09	0.412732	0.412732	0.168097	20091.3
							4.52877	2.31448	1.65724	0.703105	1.49368	16.1558	26.7741	11.5681	19.1711	4406.62		18.3973	22.9261	27.4549	22.16	0.766058	1	1		18.8948	11.4014	26.3883	945.187	945.187		3.66487	42.3412	155.175	6570.3	0.143858	0.143858	0.041918	5508.27
							5.29375	2.71234	1.85617	0.640764	1.50391	23.9434	44.443	16.3855	30.4142	12110.9		17.3248	22.6185	27.9123	17.4443	5.17427	1	1		6.42538	3.46163	9.38912	102.107	102.107		2.22502	41.0897	91.4256	3756.65	0.0271803	0.0271803	0.201491	15138.6
							5.70405	2.13164	1.56582	0.692066	1.57395	27.6564	43.3049	20.3153	31.8101	15765		15.8161	21.5201	27.2242	19.7544	1.7657	1	1		30.2477	19.3174	41.1779	2498.98	2498.98		3.19937	37.1229	118.77	4409.07	0.566782	0.566782	0.223473	19706.2
							4.97151	2.65398	1.82699	0.786056	1.50715	16.1168	29.4452	11.0947	20.2699	5102.34		18.7785	23.75	28.7215	20.4129	3.33703	1	1		15.0251	8.22395	21.8262	563.908	563.908		4.33423	43.7481	189.614	8295.26	0.0679796	0.0679796	0.0384432	6377.92
							5.50056	2.68765	1.84382	0.808396	1.65661	23.9661	44.1892	16.4416	30.3154	12555		18.4332	23.9338	29.4344	21.5044	2.42936	1	1		27.1985	14.7511	39.6458	1837.27	1837.27		3.2095	44.4401	142.63	6338.5	0.289859	0.289859	0.123797	15693.8
							4.92802	2.02928	1.51464	0.62247	1.5268	23.5457	35.6632	17.5743	26.6188	9703.35		16.997	21.925	26.8531	21.9039	0.0211881	1	1		26.6185	17.5742	35.6629	1968.98	1968.98		2.74861	40.0432	110.063	4407.28	0.446757	0.446757	0.137604	12129.2
							5.27566	1.56953	1.28477	0.673934	1.55931	24.745	31.7916	20.2554	26.0235	10672.8		18.1485	23.4242	28.6998	20.4901	2.93408	1	1		21.6276	16.8339	26.4213	1397.29	1397.29		3.81998	38.2533	146.127	5589.83	0.249971	0.249971	0.119333	13341.1
							4.78218	2.41883	1.70941	0.65351	1.64092	26.2039	44.7934	18.5186	31.656	12462.3		19.4143	24.1965	28.9787	24.1595	0.0370397	1	1		31.655	18.5181	44.792	2605.83	2605.83		2.99618	44.6427	133.757	5971.29	0.436393	0.436393	0.13044	15577.9
							5.45812	2.3161	1.65805	0.500674	1.57593	43.1522	71.5485	30.8918	51.2202	37899.8		17.8186	23.2767	28.7348	21.7117	1.56498	1	1		49.0696	29.5948	68.5444	6372.9	6372.9		4.07579	44.5668	181.645	8095.34	0.787231	0.787231	0.292605	47374.7
							5.0528	2.06419	1.53209	0.586095	1.6273	33.3001	51.019	24.7162	37.8676	20016.9		17.1572	22.21	27.2628	21.4196	0.790453	1	1		37.4014	24.4119	50.3908	3864.59	3864.59		2.84104	44.5958	126.698	5650.21	0.683972	0.683972	0.221417	25021.1
							4.54174	2.08013	1.54007	0.578919	1.50789	22.3341	34.3959	16.5354	25.4657	8115.11		17.6585	22.2002	26.742	21.537	0.663267	1	1		25.1927	16.3582	34.0271	1748.68	1748.68		3.6664	41.5718	152.419	6336.31	0.275977	0.275977	0.0800457	10143.9
							4.7006	2.29033	1.64517	0.47721	1.69671	48.4825	79.7617	34.8254	57.2936	41019.9		19.4167	24.1173	28.8179	23.6831	0.434198	1	1		57.0486	34.6765	79.4207	8652.05	8652.05		2.39062	37.307	89.1871	3327.31			0.770516	51274.8
							4.69002	2.2685	1.63425	0.600893	1.59127	26.3032	42.986	18.9491	30.9675	12001.6		18.2004	22.8904	27.5804	24.852	1.96164	1	1		28.1287	17.212	39.0453	2111.3	2111.3		2.44174	43.3029	105.734	4578.6	0.461124	0.461124	0.163828	15002
							4.03723	1.89879	1.4494	0.768966	1.50611	12.1525	17.6138	9.27633	13.4451	2072.35		19.5902	23.6275	27.6647	20.0275	3.59992	1	1		6.08614	4.19909	7.9732	105.181	105.181		2.86516	44.1516	126.501	5585.24	0.018832	0.018832	0.02319	2590.44
							5.72191	1.94015	1.47008	0.511782	1.64309	52.809	77.6332	40.014	58.8236	55840.6		19.4507	25.1726	30.8945	21.7244	3.44816	1	1		46.9427	31.9322	61.9532	6215.02	6215.02		4.757	42.9646	204.383	8781.21	0.707763	0.707763	0.397444	69800.7
							4.37589	1.76356	1.38178	0.664115	1.79292	29.3822	40.5997	23.0215	31.8106	12849.1		18.8372	23.2131	27.589	23.7862	0.573076	1	1		31.5366	22.8232	40.25	2885.97	2885.97		2.56163	47.6944	122.175	5827.08	0.495269	0.495269	0.137816	16061.3
							4.93833	1.64256	1.32128	0.696636	1.77727	32.4862	42.9233	26.132	34.5277	17401.9		19.5651	24.5034	29.4417	24.8403	0.336895	1	1		34.4472	26.0711	42.8233	3507.44	3507.44		2.54471	42.6549	108.544	4629.94	0.757555	0.757555	0.23491	21752.4
							4.52481	1.99229	1.49614	0.62996	1.60063	23.4745	35.1212	17.6286	26.3749	8801.11		18.5081	23.033	27.5578	23.078	0.0450121	1	1		26.3736	17.6277	35.1195	1944.88	1944.88		3.23679	41.0951	133.016	5466.32	0.355794	0.355794	0.100629	11001.4
							4.22029	2.01827	1.50914	0.557994	1.72278	32.6456	49.2667	24.4103	36.8385	15944.8		18.8254	23.0457	27.266	21.4898	1.55586	1	1		34.2437	22.6909	45.7965	3264.63	3264.63		2.61708	45.4523	118.952	5406.65	0.603818	0.603818	0.184319	19931
							5.01899	2.29064	1.64532	0.691201	1.73501	31.1792	51.2997	22.3954	36.8476	18115.1		19.5216	24.5406	29.5596	21.9907	2.54993	1	1		31.7377	19.2897	44.1857	2677.67	2677.67		3.12653	40.7306	127.346	5186.87	0.516239	0.516239	0.21828	22643.8
							4.40065	2.06656	1.53328	0.646668	1.56749	20.205	30.9798	14.991	22.9854	6420.63		17.4038	21.8044	26.2051	24.7518	2.94734	1	1		17.0686	11.1321	23.0051	804.549	804.549		2.43602	47.2721	115.156	5443.66	0.147795	0.147795	0.0737167	8025.78
							4.72665	2.37301	1.68651	0.697112	1.75623	28.8316	48.6247	20.4907	34.5577	14795.1		17.8524	22.5791	27.3057	24.0509	1.4718	1	1		32.8397	19.472	46.2073	2826.64	2826.64		3.58611	40.7896	146.276	5966.53	0.47375	0.47375	0.15498	18493.8
							4.90294	2.1277	1.56385	0.533541	1.53181	29.8932	46.7486	21.9714	34.36	15821		20.2232	25.1261	30.0291	25.3673	0.241175	1	1		34.3184	21.9448	46.692	3219.02	3219.02		2.44704	42.1777	103.21	4353.18	0.739465	0.739465	0.227147	19776.2
							4.27217	1.79919	1.39959	0.754949	1.87757	25.9005	36.2502	20.1481	28.1991	9802.63		17.5262	21.7984	26.0706	23.3646	1.56626	1	1		26.2357	18.7452	33.7261	1986.12	1986.12		3.96493	42.5167	168.576	7167.29	0.277109	0.277109	0.0854806	12253.3
							4.13597	1.99675	1.49837	0.68185	1.63711	19.1283	28.6614	14.354	21.5077	5345.61		17.6146	21.7506	25.8866	23.5212	1.77054	1	1		19.4373	12.9723	25.9024	1055.62	1055.62		4.11244	42.7234	175.697	7506.37	0.140629	0.140629	0.044509	6682.01
							5.46241	2.14685	1.57342	0.650066	1.60357	30.3659	47.7784	22.2552	35.0168	18247.2		16.8589	22.3213	27.7837	21.7642	0.557019	1	1		34.8342	22.1391	47.5293	3305.77	3305.77		3.46089	37.8036	130.834	4945.99	0.668373	0.668373	0.230581	22809
							5.19786	2.21723	1.60861	0.555656	1.60043	35.8134	57.6099	25.9828	41.7964	24443.2		19.1538	24.3516	29.5495	22.2677	2.08394	1	1		38.2901	23.8032	52.7771	3946.67	3946.67		3.77091	41.3374	155.88	6443.67	0.612488	0.612488	0.237085	30554
							6.16293	2.43224	1.71612	0.668542	1.79268	53.6196	92.0177	37.8325	64.9251	67402.2		16.5948	22.7577	28.9207	20.2221	2.53564	1	1		59.1753	34.4821	83.8686	9085.37	9085.37		2.70057	41.6187	112.394	4677.7			0.900578	84252.8
							4.58302	1.76288	1.38144	0.687146	1.52078	17.9177	24.7522	14.0408	19.3965	5003.88		16.9219	21.505	26.088	22.5357	1.03074	1	1		18.8996	13.6811	24.1181	1036.6	1036.6		2.63393	41.3955	109.033	4513.45	0.229669	0.229669	0.0692911	6254.85
							3.81205	1.86407	1.43204	0.750518	1.61004	13.6887	19.6027	10.5161	15.0594	2468.75		17.3175	21.1296	24.9416	21.6423	0.512702	1	1		14.9226	10.4205	19.4246	635.904	635.904		4.69311	42.7986	200.859	8596.46	0.0739727	0.0739727	0.0179489	3085.94
							4.41144	1.60914	1.30457	0.521234	1.5855	29.5547	38.5561	23.9607	31.2584	12803.3		18.1489	22.5603	26.9718	23.4708	0.910475	1	1		30.5854	23.4448	37.726	2778.68	2778.68		3.3275	45.0573	149.928	6755.36	0.411329	0.411329	0.118455	16004.2
							4.67162	2.45149	1.72574	0.621572	1.54156	22.4064	38.6678	15.7732	27.2205	8951.31		18.5471	23.2188	27.8904	22.573	0.645735	1	1		26.9592	15.6218	38.2966	1879.49	1879.49		2.50355	38.0778	95.3297	3629.94	0.517775	0.517775	0.154123	11189.1
							4.4027	2.65741	1.8287	0.54943	1.50136	22.7479	41.5991	15.654	28.6266	9006.97		17.8307	22.2334	26.6361	22.3384	0.105003	1	1		28.6184	15.6496	41.5873	2044.62	2044.62		4.36038	38.5757	168.205	6488.61	0.315109	0.315109	0.0867575	11258.7
							5.21778	1.93592	1.46796	0.785176	1.66261	23.309	34.2167	17.6746	25.9457	9913.45		20.8677	26.0855	31.3032	25.9565	0.128988	1	1		25.9378	17.6692	34.2063	1898.78	1898.78		3.13586	39.1373	122.729	4803.28	0.395308	0.395308	0.128993	12391.8
							4.08684	1.75153	1.37577	0.637366	1.69582	23.3628	32.1417	18.3506	25.2462	7572.81		18.2541	22.3409	26.4278	24.1526	1.81168	1	1		22.63	16.4491	28.811	1488.84	1488.84		2.30115	42.129	96.9449	4084.19	0.364539	0.364539	0.115886	9466.02
							4.92077	1.99274	1.49637	0.715377	1.49859	17.9914	26.9219	13.51	20.2159	5622.66		19.6428	24.5636	29.4843	24.0205	0.543049	1	1		20.0924	13.4274	26.7574	1128.72	1128.72		3.04858	42.0206	128.103	5382.97	0.209684	0.209684	0.0652829	7028.32
							4.74049	2.64273	1.82137	0.635441	1.71685	31.5045	57.3813	21.7129	39.5471	18555		17.753	22.4935	27.234	23.8614	1.36788	1	1		37.8649	20.7893	54.9406	3588.25	3588.25		3.66493	43.9218	160.97	7070.12	0.507524	0.507524	0.164027	23193.7
							5.77142	1.81754	1.40877	0.722927	1.43167	19.5721	27.5726	15.1703	21.3715	7584.12		18.8262	24.5976	30.369	24.6461	0.048467	1	1		21.3707	15.1698	27.5717	1313.99	1313.99		3.76151	41.1929	154.948	6382.73	0.205866	0.205866	0.0742641	9480.15
							4.18762	2.93001	1.96501	0.537206	1.45994	20.0454	39.3894	13.4434	26.4164	6966.36		20.0292	24.2168	28.4044	21.8099	2.40691	1	1		21.617	11.001	32.233	1113.99	1113.99		1.70189	44.1918	75.2096	3323.65	0.335171	0.335171	0.131	8707.95
							4.37919	2.61339	1.8067	0.599678	1.68047	28.2519	51.0426	19.5312	35.2869	13715.3		20.8988	25.278	29.6572	21.9565	3.32147	1	1		22.9969	12.7287	33.2651	1330.22	1330.22		3.92063	39.7325	155.776	6189.38	0.214919	0.214919	0.138496	17144.1
							4.46366	1.8676	1.4338	0.738698	1.70914	21.6382	31.0249	16.6122	23.8185	7227.33		18.9664	23.43	27.8937	22.0212	1.40884	1	1		22.6011	15.763	29.4391	1457.85	1457.85		2.3928	43.6374	104.415	4556.42	0.319956	0.319956	0.0991367	9034.16
							4.63521	2.38813	1.69407	0.728608	1.64337	20.9206	35.4409	14.8404	25.1407	7658.97		19.6429	24.2782	28.9134	20.8722	3.40595	1	1		17.0525	10.066	24.039	760.193	760.193		4.59833	39.4137	181.237	7143.21	0.106422	0.106422	0.0670127	9573.71
							4.15297	2.39197	1.69599	0.683944	1.56184	16.7281	28.3706	11.8608	20.1157	4390.25		18.455	22.608	26.761	21.2203	1.38769	1	1		18.9595	11.179	26.7399	939.104	939.104		4.88825	44.3096	216.596	9597.29	0.0978509	0.0978509	0.0285904	5487.81
							5.03235	2.40307	1.70154	0.486703	1.4968	32.9999	56.1505	23.3661	39.7583	20742.5		17.9406	22.9729	28.0053	21.1869	1.78604	1	1		37.17	21.845	52.4951	3602.63	3602.63		3.10036	45.5143	141.111	6422.56	0.560934	0.560934	0.201852	25928.1
							5.45397	2.52345	1.76173	0.600006	1.44418	24.2285	42.684	16.9149	29.7994	12370.8		20.4872	25.9411	31.3951	23.6701	2.27106	1	1		27.093	15.3787	38.8074	1874.92	1874.92		4.82994	44.7761	216.266	9683.55	0.193619	0.193619	0.0798441	15463.5
							4.96801	1.87161	1.43581	0.500883	1.53196	33.6135	48.2624	25.7866	37.0245	19423.9		17.2684	22.2364	27.2044	24.3072	2.07082	1	1		33.6547	23.4396	43.8698	3230.47	3230.47		2.18093	36.381	79.3444	2886.63			0.420557	24279.8
							3.98613	2.00837	1.50418	0.626487	1.65351	21.3219	32.0721	15.9692	24.0206	6413.75		16.6451	20.6313	24.6174	20.4052	0.226041	1	1		23.982	15.9435	32.0205	1603.84	1603.84		1.66612	44.5636	74.2483	3308.77	0.484724	0.484724	0.121151	8017.19
							4.74836	1.97134	1.48567	0.698368	1.50016	17.7348	26.3481	13.3655	19.8568	5253.25		15.7755	20.5238	25.2722	22.029	1.50521	1	1		18.8327	12.6762	24.9892	995.158	995.158		2.44571	41.2192	100.81	4155.31	0.239491	0.239491	0.0790141	6566.57
							4.73313	2.37748	1.68874	0.585916	1.68824	34.0219	57.4541	24.166	40.81	20645.4		16.4607	21.1939	25.927	25.9114	4.71752	1	1		3.31187	1.96115	4.66259	28.7269	28.7269		3.53849	44.2161	156.458	6917.98	0.00415249	0.00415249	0.186519	25806.7
							5.26737	2.198	1.599	0.658096	1.52791	23.9975	38.372	17.4577	27.9149	11085.2		20.2292	25.4966	30.7639	23.6629	1.8337	1	1		26.1687	16.3657	35.9718	1849.46	1849.46		1.83924	38.356	70.5461	2705.87	0.683501	0.683501	0.256046	13856.5
							4.79561	2.67205	1.83602	0.733098	1.76717	27.6344	50.7375	18.9882	34.8628	14514.7		16.7735	21.5692	26.3648	20.2749	1.29427	1	1		33.5691	18.2836	48.8547	2806.2	2806.2		4.20128	40.4408	169.903	6871.02	0.40841	0.40841	0.132028	18143.3
							4.98198	1.71979	1.35989	0.671043	1.58605	24.038	32.6891	19.0076	25.8484	9724.85		18.0309	23.0128	27.9948	23.8148	0.801917	1	1		25.5113	18.7598	32.2628	1901.43	1901.43		4.10956	43.262	177.787	7691.44	0.247214	0.247214	0.0790234	12156.1
							4.66477	2.5296	1.7648	0.596952	1.57794	25.6407	45.2507	17.8885	31.5696	11862.6		16.7985	21.4633	26.128	26.1187	4.65545	1	1		1.99518	1.13054	2.85981	10.1572	10.1572		3.47762	43.7312	152.08	6650.65	0.00152725	0.00152725	0.11148	14828.3
							4.86431	2.11412	1.55706	0.838108	1.75048	21.7208	33.8205	15.9975	24.909	8268.03		18.723	23.5873	28.4516	20.1831	3.40422	1	1		17.7926	11.427	24.1581	867.253	867.253		3.92657	43.2321	169.754	7338.83	0.118173	0.118173	0.0704134	10335
							4.79415	2.03209	1.51605	0.51463	1.72495	46.9735	71.214	35.0446	53.1293	37587.9		18.4998	23.294	28.0881	22.1092	1.18478	1	1		51.4813	33.9576	69.0051	7361.53	7361.53		3.99755	38.0904	152.268	5799.97			0.405044	46984.8
							4.50277	1.77519	1.38759	0.680676	1.58657	20.0376	27.8041	15.6626	21.7333	6160.3		18.31	22.8128	27.3155	22.4457	0.367027	1	1		21.661	15.6105	27.7116	1359.02	1359.02		3.6752	39.9524	146.833	5866.32	0.231665	0.231665	0.0656321	7700.37
							5.48595	2.5043	1.75215	0.615024	1.63815	36.044	63.1546	25.2184	44.1865	27448.9		20.9509	26.4369	31.9229	20.5575	5.87944	0	0		#NUM!	#NUM!	#NUM!	#NUM!			3.1691	45.154	143.097	6461.41	#VALUE!		0.265508	34311.1
							4.30234	2.11407	1.55704	0.607416	1.62035	23.8591	37.1494	17.5725	27.3609	8823.47		19.5752	23.8776	28.1799	23.1702	0.707346	1	1		26.9886	17.3333	36.6439	1995.42	1995.42		2.42121	36.9563	89.4789	3306.81	0.603426	0.603426	0.166767	11029.3
							5.34182	2.44735	1.72367	0.790852	1.67907	24.7142	42.5993	17.4063	30.0028	12443.6		18.3015	23.6433	28.9851	20.2091	3.43426	1	1		22.9806	13.3323	32.6288	1366.65	1366.65		5.04056	38.8169	195.659	7594.9	0.179943	0.179943	0.102401	15554.5
							5.54577	1.84773	1.42386	0.763533	1.6899	28.5253	40.6162	21.9817	31.2989	15555.1		17.9822	23.5279	29.0737	25.275	1.74712	1	1		29.7052	20.8624	38.548	2526.48	2526.48		2.94608	46.4791	136.931	6364.42	0.396968	0.396968	0.152754	19443.8
							5.20443	2.92853	1.96426	0.466012	1.57893	45.1524	88.6912	30.2853	59.4882	43917.2		18.3006	23.505	28.7094	17.781	5.72396	0	0		#NUM!	#NUM!	#NUM!	#NUM!			3.52789	44.0689	155.47	6851.4	#VALUE!		0.400623	54896.5
							5.70226	2.01443	1.50722	0.596547	1.71213	47.7069	71.9047	35.6947	53.7997	45978.9		20.8959	26.5981	32.3004	24.6139	1.9842	1	1		50.4376	33.464	67.4111	7086.96	7086.96		2.31001	44.8402	103.581	4644.61			0.618713	57473.6
							4.13355	2.27891	1.63945	0.535685	1.61128	26.9076	44.1138	19.3575	31.7356	11089.1		15.9913	20.1248	24.2584	26.0827	5.95782	1	0		#NUM!	#NUM!	#NUM!	#NUM!			2.09905	41.5452	87.2053	3622.96	#VALUE!		0.191299	13861.4
							5.0244	1.85965	1.42983	0.813654	1.59066	18.0985	25.8777	13.9154	19.8965	5684.01		18.3914	23.4158	28.4402	21.8626	1.55313	1	1		18.9221	13.2338	24.6103	1023.18	1023.18		3.99513	46.7474	186.762	8730.66	0.117194	0.117194	0.04069	7105.01
							5.09281	1.86449	1.43224	0.744816	1.616	22.3465	32.0056	17.1659	24.5858	8790.23		18.5654	23.6582	28.751	25.4451	1.7869	1	1		23.0227	16.0746	29.9709	1513.52	1513.52		4.1856	42.4677	177.753	7548.76	0.2005	0.2005	0.0727788	10987.8
							4.72571	1.66002	1.33001	0.686781	1.71779	27.4728	36.539	22.0112	29.2751	11940.4		17.5323	22.258	26.9837	21.7846	0.473377	1	1		29.1279	21.9005	36.3552	2501.33	2501.33		2.85537	39.6826	113.308	4496.37	0.556301	0.556301	0.165973	14925.5
							5.46276	2.55178	1.77589	0.612098	1.59783	33.0282	58.6544	22.9857	40.82	23137.7		17.5481	23.0109	28.4737	21.909	1.10189	1	1		39.981	22.5132	57.4488	4063.2	4063.2		3.02549	44.0549	133.287	5871.97	0.691966	0.691966	0.246273	28922.1
							5.16657	1.75743	1.37872	0.662927	1.3818	17.0687	23.5329	13.3905	18.4617	5114.74		15.9284	21.0949	26.2615	24.3328	3.23783	1	1		14.3866	10.4348	18.3385	601.169	601.169		2.25466	40.606	91.5527	3717.59	0.161709	0.161709	0.0859889	6393.43
							4.70656	1.918	1.459	0.540147	1.56647	29.7019	43.3351	22.5939	32.9645	14477.2		18.1469	22.8535	27.5601	19.6837	3.16974	1	1		24.3678	16.7017	32.0338	1680.81	1680.81		4.24891	42.6759	181.326	7738.26	0.217208	0.217208	0.116929	18096.5
							5.35721	2.10458	1.55229	0.707228	1.56276	23.6732	36.7476	17.4608	27.1042	10799		16.0606	21.4178	26.775	20.2878	1.12996	1	1		26.4944	17.068	35.9209	1926.1	1926.1		4.07743	44.1529	180.03	7948.85	0.242312	0.242312	0.0849098	13498.7
							4.9883	2.43067	1.71533	0.615123	1.51863	24.0117	41.1881	16.9452	29.0667	10937.6		17.9199	22.9082	27.8964	25.2621	2.35393	1	1		25.6268	14.9398	36.3138	1704.38	1704.38		3.29311	44.9651	148.075	6658.21	0.255983	0.255983	0.10267	13672
							4.76291	1.80766	1.40383	0.625483	1.65335	28.687	40.2717	22.2783	31.275	13424.7		19.8526	24.6155	29.3784	22.7649	1.85056	1	1		28.8178	20.528	37.1077	2393.1	2393.1		2.11296	39.5335	83.5328	3302.35	0.724666	0.724666	0.254075	16780.9
							4.35356	1.93915	1.46958	0.65562	1.49209	16.8571	24.7728	12.7751	18.7739	4328.45		17.4799	21.8335	26.1871	25.1772	3.34375	1	1		12.0227	8.18104	15.8643	407.735	407.735		2.49729	44.7899	111.853	5009.89	0.0813861	0.0813861	0.0539988	5410.56
							4.81019	1.78849	1.39424	0.628811	1.54415	23.1459	32.271	18.0438	25.1574	8799.38		20.0231	24.8333	29.6435	22.8297	2.00359	1	1		22.8712	16.404	29.3383	1511.94	1511.94		3.84312	42.7554	164.314	7025.3	0.215214	0.215214	0.078283	10999.2
							4.94897	1.55927	1.27964	0.608459	1.73514	37.9721	48.5905	31.1623	39.8764	23542		16.667	21.616	26.5649	20.0775	1.53852	1	1		37.9005	29.6182	46.1828	4297.23	4297.23		2.30285	37.4952	86.3458	3237.55			0.454473	29427.6
							5.25476	1.78645	1.39322	0.734691	1.61763	24.109	33.5891	18.8022	26.1957	10425.8		19.5931	24.8479	30.1026	27.0232	2.17534	1	1		23.8456	17.1154	30.5758	1644.05	1644.05		2.43926	48.6816	118.747	5780.81	0.284398	0.284398	0.11272	13032.3
							5.09632	2.02547	1.51274	0.616739	1.80407	45.1455	68.2933	33.7172	51.0053	36866.9		19.6744	24.7707	29.867	23.6617	1.10904	1	1		49.7829	32.9092	66.6566	6891.44	6891.44		3.11915	42.0669	131.213	5519.72			0.417446	46083.6
							4.48172	1.79135	1.39568	0.661398	1.68073	24.9263	34.789	19.4206	27.1048	9512.6		19.7396	24.2213	28.7031	26.7828	2.56147	1	1		22.2416	15.9361	28.5471	1429.2	1429.2		3.22387	45.7342	147.441	6743.1	0.21195	0.21195	0.0881697	11890.7
							5.15182	2.4574	1.7287	0.694375	1.50276	20.3215	35.1298	14.2955	24.7127	8128.05		17.4692	22.621	27.7728	23.6098	0.988868	1	1		24.2531	14.0297	34.4766	1519.58	1519.58		3.3114	43.4669	143.936	6256.46	0.242881	0.242881	0.0811965	10160.1
							4.90329	2.31184	1.65592	0.723087	1.56715	20.08	33.2509	14.3829	23.8169	7366.93		16.9236	21.8269	26.7302	19.8015	2.02533	1	1		21.6902	13.0986	30.2818	1246.11	1246.11		4.7276	46.0954	217.921	10045.1	0.124051	0.124051	0.0458365	9208.67
							4.56224	1.61932	1.30966	0.500355	1.72206	44.9782	58.9062	36.3771	47.6416	30712.6		18.5057	23.068	27.6302	24.057	0.988998	1	1		46.5087	35.512	57.5054	6415.56	6415.56		3.0069	40.0669	120.477	4827.16			0.397654	38390.7
							5.05019	2.17204	1.58602	0.631113	1.69723	34.1147	54.1065	24.9105	39.5085	21384		16.5134	21.5636	26.6138	21.719	0.155419	1	1		39.4898	24.8987	54.0809	4230.29	4230.29		1.93075	45.7612	88.3535	4043.16			0.330559	26730.1
							4.00207	2.11899	1.5595	0.692071	1.53894	14.8894	23.2199	10.958	17.0889	3199.08		18.5208	22.5229	26.525	21.2872	1.23567	1	1		16.254	10.4226	22.0854	723.153	723.153		3.69629	44.711	165.265	7389.14	0.097867	0.097867	0.027059	3998.85
							4.5661	2.27943	1.63971	0.67967	1.70112	25.5417	41.881	18.3735	30.1272	11038.3		18.0809	22.647	27.2131	21.0869	1.56016	1	1		28.314	17.2677	39.3604	2135.22	2135.22		4.58945	40.8919	187.671	7674.24	0.278232	0.278232	0.0898976	13797.9
							4.29798	1.90289	1.45144	0.701248	1.4732	14.4539	20.979	11.0248	16.0019	3123		17.827	22.125	26.423	25.0053	2.88033	1	1		11.8769	8.18282	15.571	400.285	400.285		2.03576	39.9643	81.3578	3251.41	0.123112	0.123112	0.0600318	3903.75
							4.56764	2.01247	1.50623	0.779212	1.60313	17.0319	25.6541	12.7476	19.2008	4692.74		15.9711	20.5388	25.1064	24.3636	3.82487	1	1		10.4955	6.96802	14.0229	306.971	306.971		3.7918	43.9747	166.743	7332.49	0.0418646	0.0418646	0.0399995	5865.92
							5.33179	1.6467	1.32335	0.812543	1.69176	24.1107	31.9069	19.3763	25.6416	10355.6		16.4379	21.7697	27.1014	25.5194	3.74978	1	1		18.2287	13.7747	22.6827	981.583	981.583		2.70082	45.9082	123.99	5692.15	0.172445	0.172445	0.113705	12944.6
							5.72427	2.76429	1.88215	0.688858	1.51044	24.49	46.0938	16.6747	31.3842	13822		19.341	25.0653	30.7895	25.2573	0.192077	1	1		31.3666	16.6653	46.0678	2411.91	2411.91		3.67525	40.9206	150.394	6154.2	0.391913	0.391913	0.140372	17277.5
							4.5891	2.91456	1.95728	0.67495	1.66282	24.2227	47.4105	16.2668	31.8387	11118.7		18.1299	22.719	27.3081	23.3941	0.675085	1	1		31.4923	16.0898	46.8948	2370.42	2370.42		3.11996	44.8094	139.804	6264.51	0.378389	0.378389	0.11093	13898.4
							5.17851	1.78179	1.3909	0.694834	1.41076	17.0074	23.6555	13.2762	18.4659	5109.31		18.178	23.3566	28.5351	19.9725	3.38409	1	1		13.9775	10.0493	17.9057	565.297	565.297		2.80785	38.274	107.467	4113.21	0.137434	0.137434	0.0776356	6386.63
							5.3817	2.93601	1.968	0.723079	1.52837	21.4945	42.3013	14.4078	28.3545	10304.3		17.097	22.4787	27.8604	23.3147	0.836028	1	1		28.0103	14.2329	41.7878	1868.49	1868.49		4.71272	41.5453	195.792	8134.23	0.229707	0.229707	0.0791741	12880.4
							4.05961	2.18593	1.59296	0.706947	1.59293	16.188	25.7869	11.7968	18.7918	3879.67		18.2227	22.2823	26.3419	18.0797	4.20262	0	1		#NUM!	#NUM!	#NUM!	#NUM!			4.24423	41.3986	175.705	7273.95	#VALUE!		0.0333354	4849.59
							3.79931	2.32081	1.6604	0.668974	1.78448	22.1831	36.8328	15.8707	26.3518	6977.27		16.6119	20.4112	24.2105	20.426	0.0147811	1	1		26.3516	15.8706	36.8326	1836.43	1836.43		2.30237	41.5123	95.5765	3967.6	0.462857	0.462857	0.10991	8721.58
							4.64432	1.7318	1.3659	0.555591	1.69771	36.7768	50.2335	29.0065	39.62	21259.9		19.3986	24.0429	28.6873	22.3773	1.66561	1	1		36.9844	27.077	46.8919	3988.84	3988.84		3.7781	42.1947	159.415	6726.48	0.593006	0.593006	0.197539	26574.9
							3.82785	2.09115	1.54558	0.748989	1.64366	14.605	22.5731	10.7946	16.6839	2930.24		15.4095	19.2374	23.0652	20.4786	1.24124	1	1		15.7824	10.2113	21.3534	685.015	685.015		3.84952	46.883	180.477	8461.3	0.0809586	0.0809586	0.0216444	3662.8
[truncated: 8,352 more rows]
[truncated: 31 more columns]

## Sheet: Info
Appendix S3: File with Monte Carlo model used to calculate the pluton area:lower plate area and the inferred
[truncated: 6 more rows]
